# Supplementary material for: Machine learning driven by environmental covariates to estimate high-resolution PM2.5 in data-poor regions
Source: PeerJ journal article supplement (doi:10.7717/peerj.13203), 2022-03-30
Supplement: data.xlsx [file data.xlsx]

## Sheet: 15
y	x1	x2	x3	x4	x5	x6	x7	x8	x9
100.954		772.448	208.844	0.0171099	444.5	137.625	93126.6	3.9068	0.00198325
51.683		772.448	238.125	0.0391707	444.625	62.125	93305.9	3.9068	0.00279541
53.0197	0.224333	772.448	245.781	0.0521012	443.25	49.0938	93177.8	3.9068	0.00321784
36.5755	0.114	772.448	274.312	0.0148966	492.5	39.3438	92848.1	3.9068	0.00391375
49.1113	0.182944	772.448	250.312	0.0560394	442.5	68.375	93139.4	4.44189	0.00350309
36.7281	0.130067	772.448	294.719	0.114465	454.5	49.6562	92888.1	4.44189	0.00438372
33.1597	0.152042	772.448	300.438	0.149672	499	61	92755.9	4.44189	0.00519797
50.7858	0.0947	772.448	300.188	0.150364	506.625	56.375	92898.1	4.44189	0.00476212
39.7004	0.1239	772.448	326.375	0.207898	527.25	59.2188	92266.2	4.67982	0.00729734
38.2701	0.143333	772.448	333.844	0.174377	499.375	55.0625	92537.2	4.67982	0.0071775
34.2401	0.11425	772.448	331.594	0.255263	476.375	56.3438	92561.2	4.67982	0.00738303
40.8976	0.140417	772.448	307.812	0.196178	497.75	70.0625	92587.2	4.67982	0.00507053
27.4631	0.24475	772.448	349.812	0.143027	435.125	63.0938	92349.1	4.55159	0.00774156
26.8357	0.187467	772.448	336.25	0.186656	350.875	61.0312	92213.4	4.55159	0.00716375
26.5815	0.25225	772.448	365.719	0.160254	270.625	59.125	91503.4	4.55159	0.0100615
21.9228	0.177972	772.448	346.75	0.222853	301.5	67.8125	92119.1	4.55159	0.00804237
32.7496	0.0968335	772.448	340.938	0.296608	424.875	68.625	92066.9	4.506	0.00808987
29.4538	0.11081	772.448	359.438	0.244623	451.625	74.3125	91691.9	4.506	0.00679284
23.9167	0.1955	772.448	381.375	0.181105	490	55	91877.5	4.506	0.0110612
22.6875	0.113567	772.448	351.281	0.208807	433.875	67.7812	91946.6	4.506	0.00674431
	0.235125	772.448	341.469	0.257259	476.375	52.8438	92460.3	4.76348	0.00682581
32.4314	0.138024	772.448	325.281	0.171911	519.75	65	92252.2	4.76348	0.00595256
25.6299	0.414667	772.448	347.562	0.140978	495	52.875	92570.6	4.76348	0.00838822
22.5854	0.185195	772.448	324.844	0.205984	476.375	49.6562	92870.6	4.46458	0.0072585
	0.13595	772.448	302	0.179776	498.375	52.875	93020.3	4.46458	0.00560459
	0.177111	772.448	304.406	0.234056	500.375	45.9688	92645.9	4.46458	0.00603872
	0.204233	772.448	278.406	0.212914	517.75	40.0938	93368.8	4.46458	0.00404822
	0.165	772.448	285.188	0.144892	533.625	43.8125	93052.8	4.79031	0.00372169
32.2974	0.190375	772.448	291.719	0.0925563	497.625	34.9688	93071.6	4.79031	0.00477978
39.619	0.220333	772.448	262.781	0.112781	420	32.6562	93459.4	4.79031	0.00365009
32.6957	0.194083	772.448	256.656	0.0375389	398	26.75	93412.2	4.79031	0.00277216
85.056		772.448	240.438	0.0195277	329.875	39.8125	92990.3	3.48634	0.00308309
64.793		772.448	254.938	0.00920788	277.875	24.875	92792.5	3.48634	0.00318291
103.445		772.448	236.375	0.0139011	268.875	34.4375	93654.1	3.48634	0.00257
113.095		772.448	243.062	0.00213451	249	21.9375	93241.6	3.48634	0.00248094
54.4938		772.448	235.625	-0.00227359	221.375	40.6562	93573.8	4.75308	0.00225184
220.286		772.448	195.219	0.0101309	192.875	66.0938	93514.7	4.75308	0.00164566
227.567		772.448	213.5	0.0252627	170.125	62.625	93566.6	4.75308	0.00229562
204.84		772.448	221.75	0.00323784	143.857	63.5	93336.6	4.75308	0.0023285
192.272		772.448	208.438	-4.53871e-06	115.429	67.8438	93389.7	3.01529	0.00163425
160.16		772.448	198.625	0.00192145	76.75	72.6875	94010.6	3.01529	0.00118819
247.569		772.448	188.344	-0.00450805	45.75	85.8125	93588.1	3.01529	0.00123794
275.933		772.448	205.719	0.0294183	13.5	94.375	93872.2	3.01529	0.00180997
182.938		772.448	201.625	0.00931499	3	106.656	93695.9	3.17647	0.00152506
183.375		772.448	202.938	0.0034844	10	122.688	94071.9	3.17647	0.00141872
55.7966		1197.15	200.312	0.0168233	573.125	121.625	88367.5	3.89771	0.00184837
27.0927		1197.15	228.375	0.0236017	574.5	59.875	88555.9	3.89771	0.00250987
37.3496	0.171875	1197.15	234.531	0.0610935	573.875	47.375	88528.1	3.89771	0.00291009
22.9708	0.329	1197.15	269.938	0.0210632	573.875	34.7188	88131.2	3.89771	0.00362997
34.85	0.180167	1197.15	235.062	0.0832969	576.75	75.75	88458.4	4.39912	0.00317594
22.3368	0.150433	1197.15	279	0.106754	608.875	47.9688	88364.7	4.39912	0.00404134
16.8746	0.143528	1197.15	283.312	0.118365	643.375	58.0625	88286.9	4.39912	0.00482878
25.4381	0.1175	1197.15	283.5	0.185192	642.5	54.5625	88393.8	4.39912	0.0042655
20.4236	0.1196	1197.15	305.844	0.221102	649.625	59	87860	4.63823	0.00652284
22.5359	0.120875	1197.15	315.562	0.242785	617.125	54.4688	88086.2	4.63823	0.00653781
14.9029	0.13865	1197.15	315.375	0.193028	586.5	50.9375	88085	4.63823	0.00683387
21.4464	0.101667	1197.15	289.938	0.260146	606.25	68.1562	88133.1	4.63823	0.00469612
19.4551	0.195667	1197.15	328.375	0.127533	543	62.6875	87955.3	4.34959	0.00713737
19.3466	0.168533	1197.15	320.75	0.192931	466.625	56.5312	87803.8	4.34959	0.00684372
18.992	0.208667	1197.15	348.531	0.186798	395.625	56.5625	87176.9	4.34959	0.00959566
11.8824	0.130944	1197.15	328.406	0.235013	414.5	65.2812	87769.7	4.34959	0.00788347
14.407	0.0796458	1197.15	321.781	0.339157	530	67.0938	87722.5	4.29689	0.00784309
71.837	0.116104	1197.15	338.812	0.215727	553.375	73.25	87476.9	4.29689	0.00659225
76.125	0.258625	1197.15	363.344	0.171233	584	51.2188	87578.8	4.29689	0.0105723
46.872	0.0945334	1197.15	332.25	0.238595	524	66.1875	87665.6	4.29689	0.00650803
34.8719	0.185125	1197.15	323.781	0.269168	573.875	52.7188	88059.7	4.68128	0.00652191
47.1078	0.118119	1197.15	309.25	0.130302	615.5	62.7188	87905.9	4.68128	0.005858
43.1742	0.3755	1197.15	334	0.167361	589.25	48.7812	88123.1	4.68128	0.00797613
31.3983	0.176472	1197.15	308.156	0.235165	570.625	48	88377.5	4.4113	0.00690113
31.7881	0.147139	1197.15	286.312	0.233709	592.25	52	88527.5	4.4113	0.00540147
36.2308	0.157389	1197.15	290.969	0.190929	594.5	44.75	88132.5	4.4113	0.00580119
35.901	0.200767	1197.15	269.625	0.197888	607	37.25	88733.1	4.4113	0.00386328
63.0037	0.157	1197.15	271.594	0.109124	620.375	42.9062	88556.2	4.82831	0.00368053
34.9232	0.152333	1197.15	280.188	0.0475806	576.875	32.6875	88504.1	4.82831	0.00462503
57.7525	0.23025	1197.15	254.375	0.0883899	499.75	31.0625	88771.9	4.82831	0.00343728
79.8429	0.142584	1197.15	245.188	0.0386876	486.125	27.6562	88735.9	4.82831	0.00265884
63.2004	0.122	1197.15	232.438	0.0246036	373.625	45.8125	88309.7	3.48903	0.00292009
62.0287		1197.15	246.062	0.0167211	302.375	29.8125	88121.2	3.48903	0.00295963
96.3734		1197.15	226.062	0.0167771	295.375	40.5312	88919.4	3.48903	0.00253
125.593		1197.15	230.781	0.00818448	279.25	20.4375	88584.4	3.48903	0.002221
44.3239		1197.15	226.188	-0.0037595	252.75	31.625	88764.1	5.05502	0.00211147
114.642		1197.15	186.062	0.0263458	226.75	68.75	88676.2	5.05502	0.00160744
136.297		1197.15	203.406	0.0205548	205.625	65.625	88815.9	5.05502	0.00210791
108.257		1197.15	213.031	0.00616136	183.571	66.6562	88602.5	5.05502	0.00219537
125.884		1197.15	199.281	0.0025331	157.143	71.9375	88577.5	3.27957	0.00160047
160.958		1197.15	189.344	0.00399328	126.5	75.3438	89089.1	3.27957	0.00118919
270.604		1197.15	183.344	0.0145595	100.125	84.9375	88705.9	3.27957	0.00142828
223.26		1197.15	199.375	0.0141643	73.375	92.9688	89028.4	3.27957	0.00184853
78.4896		1197.15	193.625	0.0165068	69.3333	105.625	88796.6	3.59126	0.0016425
126.381		1197.15	190.719	0.0266577	85	120.562	89222.5	3.59126	0.00132478
151.876		763.744	212.719	0.0294798	0	139.25	92955	3.98142	0.00201213
77.0234	0.235	763.744	241.281	0.0780931	1.125	79.3438	93142.2	3.98142	0.00288825
96.1574	0.141333	763.744	249.312	0.085282	0.625	46.875	92997.8	3.98142	0.00338244
58.7232		763.744	278.156	0.0279135	7.75	36.4688	92704.1	3.98142	0.00403131
97.0834	0.133375	763.744	253.125	0.108997	20.25	66.4375	92963.4	4.5384	0.00357956
82.4814	0.128433	763.744	296.594	0.130169	11.625	46.4062	92710.3	4.5384	0.00457225
44.1326	0.107972	763.744	303	0.205944	63	59	92576.6	4.5384	0.00537456
71.4545	0.1084	763.744	302.812	0.181223	60.625	53.75	92724.1	4.5384	0.00485897
61.9565	0.187833	763.744	328.812	0.211475	78.875	57.1562	92081.6	4.80715	0.00739412
49.8409	0.141	763.744	335.031	0.178209	40.25	52.5625	92361.6	4.80715	0.00728491
48.3042	0.110583	763.744	334.312	0.26701	35	54.0312	92393.1	4.80715	0.007474
45.6719	0.161278	763.744	311.188	0.287056	23.125	67.4062	92404.1	4.80715	0.00536703
65.9452	0.2055	763.744	352.344	0.217941	9.5	61.0938	92170.6	4.76038	0.00780875
59.2081	0.2387	763.744	336.812	0.36437	10.375	59.5	92043.1	4.76038	0.00731478
37.2862	0.22775	763.744	367.156	0.297663	24.75	59.9375	91340.6	4.76038	0.0102667
30.1146	0.127389	763.744	352.188	0.439399	55.125	65.9062	91950.3	4.76038	0.00834953
	0.1254	763.744	343.125	0.469582	148.875	66	91895.9	4.70059	0.00836734
76.6618	0.106542	763.744	362.062	0.387584	175.875	73.4375	91519.7	4.70059	0.00712478
83.3125	0.22475	763.744	385.562	0.262533	215.375	52.7812	91720.3	4.70059	0.0117231
	0.1074	763.744	355.062	0.377981	163.25	65.8438	91779.7	4.70059	0.00710069
88.4583	0.09975	763.744	342.469	0.487964	186.875	52.3125	92297.5	4.89115	0.00713575
75.5652	0.111548	763.744	329.25	0.316117	232.875	62.625	92079.1	4.89115	0.00640766
52.4492	0.4475	763.744	349.594	0.287703	214.75	50.9062	92417.8	4.89115	0.00863203
39	0.0989666	763.744	327.906	0.403428	210	48.1875	92709.4	4.58198	0.00749322
30.8261	0.129264	763.744	305.406	0.301026	229.5	50.75	92851.2	4.58198	0.00580838
104.292	0.124952	763.744	307.625	0.238369	216.375	43.9688	92480.6	4.58198	0.00628022
25.2538	0.140433	763.744	282.094	0.294124	228.375	37	93206.9	4.58198	0.00429844
98.6984	0.142833	763.744	286.594	0.205297	237.875	42.4688	92877.8	4.73998	0.00403841
57.6592	0.186583	763.744	295.938	0.137738	185.625	33	92912.5	4.73998	0.00496634
30.9082	0.217125	763.744	264.281	0.170523	85.125	31.5625	93296.9	4.73998	0.00375791
121.805	0.169167	763.744	258.031	0.113489	33.375	26	93250.6	4.73998	0.0030145
123.03	0.402	763.744	242.188	0.00987988	5	40	92826.6	3.51148	0.0032055
115.415		763.744	258.219	0.00405593	0	28.0625	92626.9	3.51148	0.00325528
112.597		763.744	238.25	0.000370315	0	34.8438	93486.9	3.51148	0.00257272
133.835		763.744	244.469	-0.00733011	0	21.4375	93065.6	3.51148	0.0025915
115.436		763.744	236.719	0.00117798	0	41.3125	93410	4.38769	0.00233728
310.141		763.744	194.781	0.00487691	0	65.75	93345	4.38769	0.00141887
376.089		763.744	215.219	0.0088766	0	62.3438	93386.9	4.38769	0.00213691
210.446		763.744	224.219	0.00669801	0	62.5312	93165	4.38769	0.00222819
163.678		763.744	209.906	0.00261245	0	67.0938	93224.7	2.78986	0.00157181
192.323		763.744	200.531	0.010842	0	71.4375	93840	2.78986	0.00120994
262.682		763.744	188.656	0.00633665	0	85.1562	93426.6	2.78986	0.001111
274.667		763.744	206.594	0.0118186	0	94.2188	93704.1	2.78986	0.00160762
142.262		763.744	201.969	0.0137973	0	106.094	93534.7	2.88808	0.00143503
200.87		763.744	205.875	0.0103012	0	120.531	93895.6	2.88808	0.00140559
140.487		772.448	208.844	0.0101521	100.5	137.625	93126.6	3.9068	0.00198325
80.0221		772.448	238.125	0.0338765	90.5	62.125	93305.9	3.9068	0.00279541
68.9962	0.232	772.448	245.781	0.0492556	83.625	49.0938	93177.8	3.9068	0.00321784
49.745	0.133	772.448	274.312	0.0159952	67.375	39.3438	92848.1	3.9068	0.00391375
62.3864	0.1145	772.448	250.312	0.0557032	87.375	68.375	93139.4	4.44189	0.00350309
47.609	0.139433	772.448	294.719	0.0956625	66.75	49.6562	92888.1	4.44189	0.00438372
38.3179	0.12695	772.448	300.438	0.137821	139.875	61	92755.9	4.44189	0.00519797
37.0126	0.0574	772.448	300.188	0.139613	164.25	56.375	92898.1	4.44189	0.00476212
45.936	0.1497	772.448	326.375	0.186243	200	59.2188	92266.2	4.67982	0.00729734
52.6669	0.102	772.448	333.844	0.161586	180.125	55.0625	92537.2	4.67982	0.0071775
57.9293	0.130979	772.448	331.594	0.232668	180.125	56.3438	92561.2	4.67982	0.00738303
66.6413	0.127333	772.448	307.812	0.23579	201.5	70.0625	92587.2	4.67982	0.00507053
35.588	0.2198	772.448	349.812	0.191934	147.25	63.0938	92349.1	4.55159	0.00774156
29.1565	0.221	772.448	336.25	0.189428	86.25	61.0312	92213.4	4.55159	0.00716375
32.8562	0.2415	772.448	365.719	0.210957	35.625	59.125	91503.4	4.55159	0.0100615
13.7224	0.167833	772.448	346.75	0.192765	79.75	67.8125	92119.1	4.55159	0.00804237
27.0348	0.112812	772.448	340.938	0.277511	210.625	68.625	92066.9	4.506	0.00808987
25.9408	0.128958	772.448	359.438	0.212392	245.125	74.3125	91691.9	4.506	0.00679284
33.4205	0.167	772.448	381.375	0.130342	292.375	55	91877.5	4.506	0.0110612
22.5811	0.1122	772.448	351.281	0.233233	250.25	67.7812	91946.6	4.506	0.00674431
22.2769	0.117	772.448	341.469	0.280191	296.75	52.8438	92460.3	4.76348	0.00682581
23.1844	0.135643	772.448	325.281	0.102739	345.125	65	92252.2	4.76348	0.00595256
20.4683	0.472333	772.448	347.562	0.165966	326.75	52.875	92570.6	4.76348	0.00838822
17.6587	0.174861	772.448	324.844	0.223769	321.375	49.6562	92870.6	4.46458	0.0072585
20.1397	0.164556	772.448	302	0.193237	348.875	52.875	93020.3	4.46458	0.00560459
21.2798	0.182452	772.448	304.406	0.186797	349	45.9688	92645.9	4.46458	0.00603872
20.9867	0.1853	772.448	278.406	0.16758	366.375	40.0938	93368.8	4.46458	0.00404822
26.8002	0.185917	772.448	285.188	0.113631	382.75	43.8125	93052.8	4.79031	0.00372169
34.965	0.216833	772.448	291.719	0.0686721	348.125	34.9688	93071.6	4.79031	0.00477978
26.9754	0.231625	772.448	262.781	0.0597903	249.375	32.6562	93459.4	4.79031	0.00365009
52.3215	0.26	772.448	256.656	0.0257126	217.25	26.75	93412.2	4.79031	0.00277216
57.2289		772.448	240.438	0.0119047	166.75	39.8125	92990.3	3.48634	0.00308309
59.5679	0.3	772.448	254.938	-0.000695156	106.5	24.875	92792.5	3.48634	0.00318291
77.6882		772.448	236.375	-0.00190583	87.875	34.4375	93654.1	3.48634	0.00257
88.4341		772.448	243.062	-0.00519352	53.875	21.9375	93241.6	3.48634	0.00248094
43.8865		772.448	235.625	-0.0144269	12.875	40.6562	93573.8	4.75308	0.00225184
203.043		772.448	195.219	0.0385424	0	66.0938	93514.7	4.75308	0.00164566
192.104		772.448	213.5	-0.00211875	0	62.625	93566.6	4.75308	0.00229562
184.458		772.448	221.75	0.000402906	0	63.5	93336.6	4.75308	0.0023285
151.563		772.448	208.438	-0.00500961	0	67.8438	93389.7	3.01529	0.00163425
148.576		772.448	198.625	-0.0066605	0	72.6875	94010.6	3.01529	0.00118819
203.238		772.448	188.344	-0.00525394	0	85.8125	93588.1	3.01529	0.00123794
225.833		772.448	205.719	-0.00141409	0	94.375	93872.2	3.01529	0.00180997
146.219		772.448	201.625	0.00124655	0	106.656	93695.9	3.17647	0.00152506
131.631		772.448	202.938	-0.0016489	0	122.688	94071.9	3.17647	0.00141872
93.1096		772.448	208.844	0.0284643	447.5	137.625	93126.6	3.88708	0.00198325
73.936		772.448	238.125	0.0414328	447.375	62.125	93305.9	3.88708	0.00279541
43.3144	0.216	772.448	245.781	0.0643368	445.5	49.0938	93177.8	3.88708	0.00321784
38.0324	0.122	772.448	274.312	0.0162553	494.5	39.3438	92848.1	3.88708	0.00391375
51.7917	0.190278	772.448	250.312	0.0824417	437.5	68.375	93139.4	4.43865	0.00350309
33.9772	0.135	772.448	294.719	0.115473	450.25	49.6562	92888.1	4.43865	0.00438372
29.3051	0.14843	772.448	300.438	0.173868	494	61	92755.9	4.43865	0.00519797
39.2844	0.108	772.448	300.188	0.179863	499.125	56.375	92898.1	4.43865	0.00476212
35.5282	0.1357	772.448	326.375	0.202723	517.25	59.2188	92266.2	4.63941	0.00729734
48.7727	0.111	772.448	333.844	0.190688	487.5	55.0625	92537.2	4.63941	0.0071775
31.1739	0.168767	772.448	331.594	0.234452	459.625	56.3438	92561.2	4.63941	0.00738303
47.2392	0.143139	772.448	307.812	0.158799	478.625	70.0625	92587.2	4.63941	0.00507053
13.2893	0.181667	772.448	349.812	0.110373	405.625	63.0938	92349.1	4.46379	0.00774156
17.8011	0.220667	772.448	336.25	0.201564	312.375	61.0312	92213.4	4.46379	0.00716375
24.615	0.28575	772.448	365.719	0.184929	239.375	59.125	91503.4	4.46379	0.0100615
14.9208	0.158	772.448	346.75	0.264218	271	67.8125	92119.1	4.46379	0.00804237
25.8339	0.0980625	772.448	340.938	0.307353	399.625	68.625	92066.9	4.41107	0.00808987
27.3382	0.126979	772.448	359.438	0.161011	428.875	74.3125	91691.9	4.41107	0.00679284
43.6875	0.228	772.448	381.375	0.199265	469.5	55	91877.5	4.41107	0.0110612
20.2083	0.100333	772.448	351.281	0.247619	413	67.7812	91946.6	4.41107	0.00674431
17.7397	0.215875	772.448	341.469	0.248627	457.5	52.8438	92460.3	4.72429	0.00682581
30.0817	0.137139	772.448	325.281	0.144891	501.75	65	92252.2	4.72429	0.00595256
27.5515	0.383125	772.448	347.562	0.211153	473	52.875	92570.6	4.72429	0.00838822
17.4848	0.196833	772.448	324.844	0.278289	449.875	49.6562	92870.6	4.41844	0.0072585
15.8264	0.174155	772.448	302	0.176032	479	52.875	93020.3	4.41844	0.00560459
17.7033	0.166767	772.448	304.406	0.189388	486.625	45.9688	92645.9	4.41844	0.00603872
18.9314	0.217467	772.448	278.406	0.187716	507	40.0938	93368.8	4.41844	0.00404822
34.4683	0.1785	772.448	285.188	0.113142	524.625	43.8125	93052.8	4.83967	0.00372169
27.4069	0.197458	772.448	291.719	0.097277	484.375	34.9688	93071.6	4.83967	0.00477978
39.7917	0.232583	772.448	262.781	0.0663368	406.5	32.6562	93459.4	4.83967	0.00365009
38.1304	0.194833	772.448	256.656	0.0523491	385	26.75	93412.2	4.83967	0.00277216
62.1738		772.448	240.438	0.00391664	316.75	39.8125	92990.3	3.50683	0.00308309
62.8591	0.279	772.448	254.938	0.00599451	267.75	24.875	92792.5	3.50683	0.00318291
86.896		772.448	236.375	0.00454966	258.875	34.4375	93654.1	3.50683	0.00257
83.2612		772.448	243.062	0.00213422	238	21.9375	93241.6	3.50683	0.00248094
47.3571		772.448	235.625	-0.00828996	210.375	40.6562	93573.8	4.9766	0.00225184
197.732		772.448	195.219	0.00373061	181.375	66.0938	93514.7	4.9766	0.00164566
160.317		772.448	213.5	0.00315478	158.125	62.625	93566.6	4.9766	0.00229562
137.911		772.448	221.75	0.0024454	131.857	63.5	93336.6	4.9766	0.0023285
164.263		772.448	208.438	-0.00439897	103.429	67.8438	93389.7	3.13991	0.00163425
146.385		772.448	198.625	-0.00715038	71.5	72.6875	94010.6	3.13991	0.00118819
213.708		772.448	188.344	0.00622323	42.75	85.8125	93588.1	3.13991	0.00123794
239.174		772.448	205.719	0.00762022	10.75	94.375	93872.2	3.13991	0.00180997
98.1		772.448	201.625	0.00344621	3	106.656	93695.9	3.37627	0.00152506
161.047		772.448	202.938	0.00624361	10	122.688	94071.9	3.37627	0.00141872
127.513		763.744	212.719	0.0230611	257.25	139.25	92955	3.83758	0.00201213
57.5647	0.127	763.744	241.281	0.0698147	253.125	79.3438	93142.2	3.83758	0.00288825
73.6501	0.136667	763.744	249.312	0.0809339	250.125	46.875	92997.8	3.83758	0.00338244
43.1144	0.124	763.744	278.156	0.0324613	238.25	36.4688	92704.1	3.83758	0.00403131
64.3244	0.145	763.744	253.125	0.086037	277.375	66.4375	92963.4	4.37966	0.00357956
47.7257	0.123567	763.744	296.594	0.106635	257.5	46.4062	92710.3	4.37966	0.00457225
32.8732	0.103528	763.744	303	0.174803	337.125	59	92576.6	4.37966	0.00537456
50.1043	0.089	763.744	302.812	0.151932	354.375	53.75	92724.1	4.37966	0.00485897
33.7478	0.1445	763.744	328.812	0.24056	391.5	57.1562	92081.6	4.66659	0.00739412
39.4796	0.1865	763.744	335.031	0.181711	378.875	52.5625	92361.6	4.66659	0.00728491
31.4827	0.134333	763.744	334.312	0.266662	393.875	54.0312	92393.1	4.66659	0.007474
51.8501	0.144	763.744	311.188	0.26577	432.75	67.4062	92404.1	4.66659	0.00536703
42.4993	0.1685	763.744	352.344	0.168623	411.75	61.0938	92170.6	4.55913	0.00780875
40.9853	0.2567	763.744	336.812	0.231206	371.625	59.5	92043.1	4.55913	0.00731478
38.587	0.257125	763.744	367.156	0.184589	287.375	59.9375	91340.6	4.55913	0.0102667
17.1058	0.154306	763.744	352.188	0.311963	328.125	65.9062	91950.3	4.55913	0.00834953
26.9183	0.108667	763.744	343.125	0.344691	455	66	91895.9	4.51497	0.00836734
24.8379	0.143458	763.744	362.062	0.267343	478.75	73.4375	91519.7	4.51497	0.00712478
35.3034	0.2302	763.744	385.562	0.214189	508.75	52.7812	91720.3	4.51497	0.0117231
21.0888	0.1449	763.744	355.062	0.251362	454.625	65.8438	91779.7	4.51497	0.00710069
28.625	0.219	763.744	342.469	0.319373	489.375	52.3125	92297.5	4.72679	0.00713575
25.0608	0.149667	763.744	329.25	0.226879	530.875	62.625	92079.1	4.72679	0.00640766
18.9617	0.435167	763.744	349.594	0.189539	515.75	50.9062	92417.8	4.72679	0.00863203
17.7677	0.196167	763.744	327.906	0.307756	508.625	48.1875	92709.4	4.41743	0.00749322
18.8117	0.163267	763.744	305.406	0.246101	510	50.75	92851.2	4.41743	0.00580838
17.6432	0.160119	763.744	307.625	0.200108	492.125	43.9688	92480.6	4.41743	0.00628022
20.9924	0.210433	763.744	282.094	0.26016	497	37	93206.9	4.41743	0.00429844
38.6522	0.191167	763.744	286.594	0.189445	504.25	42.4688	92877.8	4.61374	0.00403841
38.0521	0.224972	763.744	295.938	0.104206	476.75	33	92912.5	4.61374	0.00496634
34.4948	0.236667	763.744	264.281	0.133962	393.625	31.5625	93296.9	4.61374	0.00375791
49.8557	0.246333	763.744	258.031	0.0406343	352.625	26	93250.6	4.61374	0.0030145
68.6528		763.744	242.188	0.0188401	300.5	40	92826.6	3.38408	0.0032055
64.0662	0.341	763.744	258.219	0.00383401	239.5	28.0625	92626.9	3.38408	0.00325528
79.4692		763.744	238.25	0.00301414	225.75	34.8438	93486.9	3.38408	0.00257272
82.7062		763.744	244.469	-0.0109705	196.75	21.4375	93065.6	3.38408	0.0025915
51.3579		763.744	236.719	-0.0019679	162.25	41.3125	93410	4.44173	0.00233728
151.294		763.744	194.781	0.0110868	128.375	65.75	93345	4.44173	0.00141887
192.589		763.744	215.219	0.0188232	95.875	62.3438	93386.9	4.44173	0.00213691
163.069		763.744	224.219	0.00351656	61	62.5312	93165	4.44173	0.00222819
162.841		763.744	209.906	-0.00291528	25.1429	67.0938	93224.7	2.8333	0.00157181
165.531		763.744	200.531	0.00737723	0.625	71.4375	93840	2.8333	0.00120994
200.807		763.744	188.656	0.00794469	0	85.1562	93426.6	2.8333	0.001111
233.021		763.744	206.594	0.0102203	0	94.2188	93704.1	2.8333	0.00160762
117.812		763.744	201.969	0.00913699	0	106.094	93534.7	2.98092	0.00143503
144.798		763.744	205.875	0.00742645	0	120.531	93895.6	2.98092	0.00140559
79.2614		772.448	208.844	0.0719387	0	137.625	93126.6	4.00219	0.00198325
68.6814	0.22475	772.448	238.125	0.0537302	0.5	62.125	93305.9	4.00219	0.00279541
50.1801	0.2305	772.448	245.781	0.0624221	0.25	49.0938	93177.8	4.00219	0.00321784
28.1396	0.194	772.448	274.312	0.0244383	3	39.3438	92848.1	4.00219	0.00391375
36.021	0.206733	772.448	250.312	0.0912279	10.25	68.375	93139.4	4.58645	0.00350309
33.2573	0.128967	772.448	294.719	0.0979426	5.375	49.6562	92888.1	4.58645	0.00438372
38.824	0.1305	772.448	300.438	0.141014	27.75	61	92755.9	4.58645	0.00519797
43.5909	0.054	772.448	300.188	0.121981	12.75	56.375	92898.1	4.58645	0.00476212
35.5163	0.176167	772.448	326.375	0.186911	8.125	59.2188	92266.2	4.74328	0.00729734
40.2605	0.195625	772.448	333.844	0.156534	0.375	55.0625	92537.2	4.74328	0.0071775
33.2408	0.138917	772.448	331.594	0.178697	6.375	56.3438	92561.2	4.74328	0.00738303
	0.161861	772.448	307.812	0.276102	1.125	70.0625	92587.2	4.74328	0.00507053
	0.101833	772.448	349.812	0.171275	0.25	63.0938	92349.1	4.67302	0.00774156
48.484	0.223933	772.448	336.25	0.197714	1.25	61.0312	92213.4	4.67302	0.00716375
35.6522	0.212333	772.448	365.719	0.177517	11.375	59.125	91503.4	4.67302	0.0100615
31.75	0.12875	772.448	346.75	0.224647	20.5	67.8125	92119.1	4.67302	0.00804237
34.6134	0.104396	772.448	340.938	0.28563	85.75	68.625	92066.9	4.60825	0.00808987
33.7003	0.116548	772.448	359.438	0.226609	102.625	74.3125	91691.9	4.60825	0.00679284
60.9398	0.208375	772.448	381.375	0.168929	123.625	55	91877.5	4.60825	0.0110612
39.8592	0.1234	772.448	351.281	0.238455	49.5	67.7812	91946.6	4.60825	0.00674431
33.1134	0.22025	772.448	341.469	0.205052	65.125	52.8438	92460.3	4.86327	0.00682581
36.4475	0.161048	772.448	325.281	0.173997	105.875	65	92252.2	4.86327	0.00595256
29.7195	0.47925	772.448	347.562	0.181257	71	52.875	92570.6	4.86327	0.00838822
30.3242	0.1979	772.448	324.844	0.178545	46.25	49.6562	92870.6	4.54575	0.0072585
29.8676	0.183417	772.448	302	0.178655	63.375	52.875	93020.3	4.54575	0.00560459
22.4344	0.174333	772.448	304.406	0.174645	51.875	45.9688	92645.9	4.54575	0.00603872
10.9565	0.2071	772.448	278.406	0.204596	63.875	40.0938	93368.8	4.54575	0.00404822
80.3873	0.195	772.448	285.188	0.162372	78.125	43.8125	93052.8	4.95374	0.00372169
151.875	0.22145	772.448	291.719	0.0884231	32.25	34.9688	93071.6	4.95374	0.00477978
12.5417	0.25225	772.448	262.781	0.155308	0	32.6562	93459.4	4.95374	0.00365009
101.652	0.198667	772.448	256.656	0.0169356	0	26.75	93412.2	4.95374	0.00277216
115.833	0.37575	772.448	240.438	0.0201444	0	39.8125	92990.3	3.65075	0.00308309
34.8886		772.448	254.938	-0.000671971	0	24.875	92792.5	3.65075	0.00318291
39.8478		772.448	236.375	-0.00239683	0	34.4375	93654.1	3.65075	0.00257
95.5217		772.448	243.062	-0.00775245	0	21.9375	93241.6	3.65075	0.00248094
70.4617		772.448	235.625	-0.00889562	0	40.6562	93573.8	4.9986	0.00225184
339.583		772.448	195.219	-0.0137416	0	66.0938	93514.7	4.9986	0.00164566
352.125		772.448	213.5	0.000980136	0	62.625	93566.6	4.9986	0.00229562
183.458		772.448	221.75	0.00290569	0	63.5	93336.6	4.9986	0.0023285
138.098		772.448	208.438	-0.000441179	0	67.8438	93389.7	3.10112	0.00163425
211.438		772.448	198.625	-0.0119341	0	72.6875	94010.6	3.10112	0.00118819
328.613		772.448	188.344	-0.000148595	0	85.8125	93588.1	3.10112	0.00123794
258.125		772.448	205.719	-0.00900748	0	94.375	93872.2	3.10112	0.00180997
247.583		772.448	201.625	0.00358464	0	106.656	93695.9	3.26449	0.00152506
222.825		772.448	202.938	-0.00296176	0	122.688	94071.9	3.26449	0.00141872
19.2787	0.0977778	426.848	218.625	0.113679	0.375	42.125	97295	6.04161	0.00189872
18.9911	0.168333	426.848	260.625	0.0519174	3.625	37.3438	97392.2	6.04161	0.00257441
18.7498	0.16	426.848	264.594	0.0605798	2	43.4062	97184.1	6.04161	0.00303638
17.2114		426.848	286.062	0.0165715	12.625	38.7812	96877.2	6.04161	0.00323794
22.3337	0.195933	426.848	260.5	0.11501	95.125	90.5625	97155.9	6.03263	0.00380619
21.9932	0.0789443	426.848	311.625	0.0743098	85.75	43	96720.9	6.03263	0.00506856
22.0532	0.0980834	426.848	319.625	0.113938	172.5	64.5312	96456.2	6.03263	0.00588247
22.046	0.100667	426.848	319.281	0.222514	306.125	60.2188	96640.9	6.03263	0.00479337
20.2548	0.0942223	426.848	340.406	0.141589	337.875	56.875	95928.1	6.62913	0.00576066
20.7136	0.101	426.848	349.906	0.0915276	342	55.0312	96173.1	6.62913	0.00659653
20.4323		426.848	343.094	0.160394	408.625	53.8438	96270.9	6.62913	0.00622009
43.3656	0.078375	426.848	328.438	0.194288	462	74.1562	96245.3	6.62913	0.00484709
37.1204		426.848	373.906	0.168468	463.25	59.625	95951.2	5.69725	0.00753269
36.5592	0.14625	426.848	364.188	0.263954	450.625	64.5938	95814.1	5.69725	0.00706606
24.9719	0.192611	426.848	391.375	0.162781	415.75	58.7188	95022.5	5.69725	0.00974606
18.7708	0.14675	426.848	375.656	0.227672	403.375	60.7188	95720	5.69725	0.00884847
16.9586	0.126083	426.848	363.781	0.340154	515.625	72.125	95664.1	5.83798	0.00837688
18.868	0.179357	426.848	398.094	0.229332	533.125	74.3438	95198.8	5.83798	0.00770528
20.7179	0.2184	426.848	401.344	0.225806	584.5	65.2812	95406.2	5.83798	0.00829622
15.6178	0.127286	426.848	373.719	0.289131	590.625	69.8125	95476.9	5.83798	0.00583581
20.8656	0.15425	426.848	360.25	0.31018	605.875	59.1562	96085.3	5.96934	0.00588331
21.9545	0.106667	426.848	352.062	0.145646	614.125	60.4062	95873.4	5.96934	0.00555656
20.5922	0.19	426.848	357.688	0.216522	615.75	50.375	96326.2	5.96934	0.00827669
19.1161	0.1688	426.848	343.969	0.179462	592.125	49.6562	96613.8	6.25501	0.00675866
19.3387	0.164125	426.848	335.062	0.12208	551.75	41.8125	96813.1	6.25501	0.00569028
17.9511	0.137	426.848	327.781	0.146296	528.125	32.9062	96446.2	6.25501	0.0059105
17.7441	0.0958333	426.848	297.5	0.231554	536.875	31	97325.6	6.25501	0.00446006
19.2517	0.161067	426.848	306.438	0.100457	523	33.375	96930.9	6.63892	0.00515675
15.363	0.209333	426.848	307.812	0.129596	409	30.0938	97029.4	6.63892	0.00470831
12.1819	0.15945	426.848	260.719	0.121816	371.25	30.75	97460	6.63892	0.00364197
11.5435	0.238375	426.848	278	0.116437	344	24.875	97487.8	6.63892	0.00368419
13.4227	0.27125	426.848	249.344	0.0681983	326.125	24.9688	97057.5	4.91472	0.00320366
13.9094	0.249	426.848	282.875	0.0145867	240.625	19.125	96819.7	4.91472	0.00374359
13.512	0.288	426.848	246.25	0.00901662	214.5	30.7188	97805.9	4.91472	0.00260906
15.9878		426.848	253.25	0.00826556	88.25	19.9688	97346.6	4.91472	0.00305175
12.6972		426.848	250.531	0.0186171	47.25	44.4375	97710.6	4.74907	0.00261987
53.7492		426.848	200.156	0.00351691	6	62.0625	97790	4.74907	0.00129656
55.9821		426.848	229.594	-0.00282983	0	54.0312	97743.4	4.74907	0.00171244
28.2431		426.848	246.375	0.00281675	0	52.0625	97533.4	4.74907	0.00212947
24.4352		426.848	229.969	0.00304657	0	61.9062	97666.6	4.68608	0.0017035
20.1094		426.848	209.031	0.00550964	0	70.75	98371.2	4.68608	0.00120256
35.6597		426.848	196.844	0.00394588	0	86.375	97985	4.68608	0.00104581
37.4219		426.848	219.406	0.00711974	0	93.1562	98192.5	4.68608	0.00136834
28.0469		426.848	196.594	0.00921994	0	111.656	98018.8	5.05698	0.00117162
30.7708		426.848	194.156	0.0213996	0	128.906	98376.2	5.05698	0.00109453
16.5851	0.0953666	426.848	206.469	0.134923	1.25	42.125	97295	6.30579	0.00189872
13.0639	0.168333	426.848	247.406	0.0522427	6.375	37.3438	97392.2	6.30579	0.00257441
12.1139	0.1482	426.848	249.25	0.0778693	4.375	43.4062	97184.1	6.30579	0.00303638
7.4821		426.848	263.938	0.0169688	42.125	38.7812	96877.2	6.30579	0.00323794
19.7015	0.211722	426.848	234.188	0.137817	108.75	90.5625	97155.9	6.16018	0.00380619
9.78723	0.0982708	426.848	279.156	0.0981325	96.5	43	96720.9	6.16018	0.00506856
13.2617	0.133	426.848	285.219	0.113784	190.125	64.5312	96456.2	6.16018	0.00588247
11.6341	0.106611	426.848	282.5	0.265231	337.125	60.2188	96640.9	6.16018	0.00479337
9.64493	0.102833	426.848	300.594	0.211494	369.5	56.875	95928.1	6.60464	0.00576066
8.42381	0.116	426.848	304.188	0.0934996	384.625	55.0312	96173.1	6.60464	0.00659653
6.668		426.848	307.344	0.159821	466.5	53.8438	96270.9	6.60464	0.00622009
6.13533	0.104667	426.848	277.094	0.287238	517.125	74.1562	96245.3	6.60464	0.00484709
9.03551	0.16075	426.848	319.906	0.160448	519.875	59.625	95951.2	5.67925	0.00753269
8.39594	0.149792	426.848	323.594	0.378826	505.875	64.5938	95814.1	5.67925	0.00706606
11.3364	0.139125	426.848	342.719	0.227194	475.125	58.7188	95022.5	5.67925	0.00974606
8.92079	0.150667	426.848	328.906	0.249073	470.25	60.7188	95720	5.67925	0.00884847
10.2178	0.119024	426.848	316.438	0.412965	574.625	72.125	95664.1	5.91391	0.00837688
12.487	0.177214	426.848	349	0.194738	587.625	74.3438	95198.8	5.91391	0.00770528
15.8297	0.2004	426.848	346.656	0.333264	636.875	65.2812	95406.2	5.91391	0.00829622
10.5278	0.139786	426.848	317.125	0.343663	638.5	69.8125	95476.9	5.91391	0.00583581
11.2206	0.12225	426.848	316.219	0.328266	649.375	59.1562	96085.3	6.06854	0.00588331
13.2599	0.131792	426.848	310.656	0.178129	657.125	60.4062	95873.4	6.06854	0.00555656
10.6227	0.208	426.848	319.469	0.260513	657.75	50.375	96326.2	6.06854	0.00827669
11.0672	0.14165	426.848	298.438	0.27151	635	49.6562	96613.8	6.24414	0.00675866
11.3493	0.14825	426.848	300.562	0.157277	586.125	41.8125	96813.1	6.24414	0.00569028
10.3194	0.151625	426.848	290.219	0.221527	560.875	32.9062	96446.2	6.24414	0.0059105
9.55781	0.08525	426.848	268.438	0.286003	569.125	31	97325.6	6.24414	0.00446006
19.0375	0.143667	426.848	280.656	0.171768	555.25	33.375	96930.9	6.93254	0.00515675
11.4019	0.163833	426.848	290.25	0.12623	431.125	30.0938	97029.4	6.93254	0.00470831
11.2478	0.13285	426.848	237.969	0.205886	386.25	30.75	97460	6.93254	0.00364197
14.1013	0.224625	426.848	272.438	0.118614	355.25	24.875	97487.8	6.93254	0.00368419
22.3462	0.228125	426.848	243.906	0.0894512	338.125	24.9688	97057.5	5.26338	0.00320366
22.4762	0.2125	426.848	262.656	0.0198185	238.625	19.125	96819.7	5.26338	0.00374359
19.7692	0.221	426.848	229.219	0.015282	210.625	30.7188	97805.9	5.26338	0.00260906
24.3023		426.848	251.438	-0.00397974	74.25	19.9688	97346.6	5.26338	0.00305175
17.9178		426.848	229.5	0.0587818	33.25	44.4375	97710.6	5.26181	0.00261987
108.942		426.848	202.469	-0.00152652	1	62.0625	97790	5.26181	0.00129656
102.575		426.848	241.562	0.00300019	0	54.0312	97743.4	5.26181	0.00171244
51.5469		426.848	237.812	0.00491766	0	52.0625	97533.4	5.26181	0.00212947
49.0401		426.848	239.375	0.0172423	0	61.9062	97666.6	5.33842	0.0017035
40.9427		426.848	205.094	0.0314089	0	70.75	98371.2	5.33842	0.00120256
86.5938		426.848	196.562	0.0121689	0	86.375	97985	5.33842	0.00104581
79.9427		426.848	226.25	0.0190728	0	93.1562	98192.5	5.33842	0.00136834
61.0365		426.848	191.938	0.0229295	0	111.656	98018.8	5.62022	0.00117162
66.8073		426.848	189.531	0.0351757	0	128.906	98376.2	5.62022	0.00109453
26.3037	0.136875	1547.74	223.094	0.0818694	0.25	46.375	84691.6	5.51455	0.00201225
26.0096	0.148	1547.74	262.188	0.0583589	0.875	50.4688	84911.6	5.51455	0.00251678
28.1554	0.153833	1547.74	273.062	0.0440812	0	47.0625	84896.2	5.51455	0.00328084
23.2964		1547.74	290.812	0.0191245	10	54.8438	84590	5.51455	0.00300953
37.4665	0.205472	1547.74	268.5	0.054839	59.875	154.906	84839.4	5.53719	0.00316903
30.1548	0.081861	1547.74	320.25	0.0484792	54.625	60.875	84817.2	5.53719	0.00505213
32.8551	0.105267	1547.74	326.188	0.09971	135.75	66.5312	84753.8	5.53719	0.00547638
37.6726	0.117028	1547.74	328.438	0.106874	273	67.125	84881.6	5.53719	0.00468075
34.2401	0.109278	1547.74	351.25	0.117763	272.5	56.7188	84431.2	6.44693	0.00604194
29.4279	0.11	1547.74	360	0.0905689	204.625	55.875	84609.1	6.44693	0.00659537
33.3982		1547.74	354.781	0.134388	265.125	36.5312	84630.6	6.44693	0.00655928
31.7016	0.119017	1547.74	339.531	0.158182	334.5	81.6875	84644.4	6.44693	0.00500569
33.6497	0.166222	1547.74	381.875	0.0401316	247.75	66.6875	84529.1	5.75583	0.00758047
32.9983	0.108	1547.74	366.188	0.121311	231.125	60.7188	84360.9	5.75583	0.00717188
36.0803	0.183	1547.74	397.219	0.0747277	185.625	59.1562	83811.9	5.75583	0.00972653
31.7884	0.183	1547.74	382.312	0.186055	197.125	67.625	84337.8	5.75583	0.00804791
32.1449	0.123583	1547.74	372.656	0.14503	337.75	75.8125	84313.1	5.79817	0.00791009
34.1284	0.1834	1547.74	405.75	0.0653852	355	76.2188	84185.3	5.79817	0.00878397
41.8417	0.1779	1547.74	411.562	0.114003	444.75	63.2188	84232.2	5.79817	0.00847603
44.6624	0.143625	1547.74	382.719	0.0942408	484.75	76.25	84310	5.79817	0.00590625
44.1742	0.192125	1547.74	369.094	0.0806111	513.25	59.0625	84638.1	5.77719	0.00637675
29.0698	0.122867	1547.74	360.938	0.0601883	513.25	63.1875	84499.4	5.77719	0.006394
22.0555	0.195167	1547.74	366.562	0.0683293	515	46	84742.5	5.77719	0.00754269
20.7052	0.136267	1547.74	353.719	0.0796001	496	49.9688	84917.2	6.07204	0.00622656
25.1585	0.135267	1547.74	340.344	0.0381057	462.5	37.5625	85017.2	6.07204	0.0057055
17.8513	0.0825	1547.74	333.375	0.0746138	431.125	33.375	84617.2	6.07204	0.00537638
25.0619	0.109437	1547.74	302.031	0.0846496	441	36.0312	85169.4	6.07204	0.00356603
40.3914	0.192375	1547.74	308.562	0.0449211	420.875	30.9688	85016.9	6.02894	0.00511872
31.7581	0.1825	1547.74	313.656	0.0650321	374.875	29.4688	85007.5	6.02894	0.00477888
33.7802	0.137292	1547.74	269.469	0.041379	356.375	35.75	85160.6	6.02894	0.00321331
31.7593	0.19075	1547.74	281.156	0.0387656	338.75	31.9688	85130.6	6.02894	0.00359534
37.5728	0.265167	1547.74	250.812	0.00214101	300.125	61.3438	84665.6	4.42511	0.00294069
44.0855	0.215167	1547.74	284.75	-0.00207339	264.75	51	84503.1	4.42511	0.00326728
39.8493	0.262	1547.74	252.344	0.00651741	242.75	69.7188	85245.6	4.42511	0.00220934
34.301		1547.74	254.875	-0.00112062	201.375	56.6875	84906.2	4.42511	0.00296872
26.928		1547.74	258.688	0.00153274	166.75	54.25	85060.6	3.99183	0.00189291
101.864		1547.74	200.844	0.000984706	128	61.125	84891.2	3.99183	0.00120859
129.974		1547.74	225.375	-0.00318871	89.125	50.5625	85019.4	3.99183	0.00213937
64.2865		1547.74	245.75	-0.0221306	45.8571	54.5312	84879.7	3.99183	0.00212456
56.2953		1547.74	225.312	-0.0201314	2	57.1562	84845	3.8729	0.00199666
45.9167		1547.74	211.719	-0.0222736	0	70.3438	85279.7	3.8729	0.00129572
94.3802		1547.74	196.906	-0.0235148	0	82.9062	84935	3.8729	0.00113025
91.9531		1547.74	214.531	-0.0173968	0	87.2812	85230.9	3.8729	0.00154484
74.6548		1547.74	200.625	-0.0075492	0	108.906	85019.1	4.31647	0.001081
74.2031		1547.74	196.938	0.0226747	0	130.438	85435	4.31647	0.001297
102.411		245.728	213.875	0.0590314	0	77.25	99600	3.07906	0.0019475
44.4117		245.728	251.781	0.0461111	0.25	36.5625	99683.1	3.07906	0.00279559
60.9087		245.728	250.531	0.061735	0	42.1562	99423.8	3.07906	0.00329181
32.8279		245.728	286.188	0.000461664	10.125	33.4062	99129.1	3.07906	0.00369256
44.8063	0.18775	245.728	254	0.0614145	69.625	69.5625	99405.6	3.78739	0.00406669
24.9775	0.145	245.728	302.625	0.0773587	93.125	39.6875	98892.5	3.78739	0.00533819
13.6454	0.0688332	245.728	317.344	0.11796	170	59.5	98597.5	3.78739	0.00589944
21.1715	0.1607	245.728	313.25	0.171803	226.375	54.375	98789.7	3.78739	0.00482331
11.7222	0.0984167	245.728	333.531	0.183404	158.25	54.7188	98046.9	3.96593	0.00617003
13.6116	0.1145	245.728	345.75	0.124729	108.125	53.5	98311.2	3.96593	0.00675531
9.6152	0.102542	245.728	344.469	0.203781	170.125	50.9375	98409.7	3.96593	0.00647303
11.5367	0.0816	245.728	326.062	0.315299	194.125	68.5	98379.4	3.96593	0.00496091
9.58111	0.113333	245.728	372.062	0.294185	206.625	55.1562	98064.1	4.11129	0.00774197
12.0808	0.121958	245.728	367.438	0.237619	234.25	65.75	97911.6	4.11129	0.00689878
13.0571	0.174333	245.728	391.219	0.239437	228.375	57.3438	97079.4	4.11129	0.00978541
7.80714	0.130417	245.728	367.062	0.269186	245	58.3125	97803.1	4.11129	0.00949959
13.1467	0.1311	245.728	362.688	0.365532	383.5	66.375	97736.2	3.85049	0.00864644
15.9068	0.149635	245.728	396.75	0.34818	387.125	72.2188	97199.4	3.85049	0.00779669
16.5512	0.217917	245.728	395.688	0.279176	435	61.8125	97451.9	3.85049	0.00879728
10.4699	0.115867	245.728	370.438	0.242348	463.875	67.5	97526.9	3.85049	0.00608356
14.0334	0.1504	245.728	366.531	0.336731	499.125	56.3438	98190.3	4.02052	0.00609612
3.4375	0.125667	245.728	353.031	0.157264	468.25	57.8125	97935.3	4.02052	0.005817
2	0.383833	245.728	362.312	0.213978	411.625	45.6875	98435.9	4.02052	0.008499
8.2646	0.194833	245.728	339.875	0.265053	435	46.6562	98746.6	3.73059	0.00680297
16.4957	0.194805	245.728	325.406	0.124555	429.625	42.8438	98951.2	3.73059	0.00571066
10.5714	0.103	245.728	316.438	0.178294	401.875	35.9375	98604.1	3.73059	0.00608372
	0.173567	245.728	287.094	0.254817	422	31.125	99551.6	3.73059	0.00472478
28.8665	0.157444	245.728	302.031	0.139823	431.875	37.3438	99090.3	3.19618	0.00519647
27.9332	0.276417	245.728	307.469	0.0335944	420	28.9688	99216.6	3.19618	0.00488025
29.9467	0.1995	245.728	261.281	0.140568	408.625	28.5312	99708.1	3.19618	0.00387906
38.9068	0.21725	245.728	273.156	0.0953636	388.375	24.7188	99736.6	3.19618	0.00381378
48.1312	0.238	245.728	253.25	0.0505896	368	25.5	99313.4	2.49256	0.00330963
37.5424		245.728	278.188	-0.00616575	341.375	17.4062	99077.2	2.49256	0.00395803
48.6718		245.728	235.656	0.00228304	320.5	20.5	100111	2.49256	0.00272272
48.8854		245.728	245.406	-0.00683108	118	18.9688	99626.6	2.49256	0.00307194
24.1733		245.728	257.344	-0.00836667	0	40.5938	100048	2.13673	0.00277737
93.5764		245.728	203.75	-0.0118197	0	60.75	100155	2.13673	0.00129562
160.339		245.728	233.469	-0.00874951	0	56.375	100085	2.13673	0.00163369
115.992		245.728	251.094	-0.00558673	0	53.2188	99855	2.13673	0.00205981
132.089		245.728	229.125	-0.00165713	0	62.5	100020	2.29639	0.00157822
108.005		245.728	206.969	-0.00750458	0	70.875	100772	2.29639	0.001192
190.354		245.728	191.094	-0.00499909	0	87.2188	100373	2.29639	0.000942031
164.885		245.728	232.125	-0.00683486	0	96.0938	100572	2.29639	0.00122912
82.0937		245.728	206.625	-0.00669189	0	110.312	100411	2.49486	0.00116275
114.151		245.728	194.406	-0.00823782	0	129.75	100767	2.49486	0.00101744
15.9207	0.060375	432.096	235.188	0.139555	212.625	49.0938	97414.7	5.08301	0.00190447
15.1838	0.0815417	432.096	242.688	0.0906669	212.875	41.4375	97464.7	5.08301	0.00239872
15.6936	0.157	432.096	250.188	0.106982	212.375	52.4062	97283.4	5.08301	0.00282313
11.9163	0.119	432.096	285.094	0.0446317	207.5	39.9062	96906.6	5.08301	0.00329553
21.9744	0.1875	432.096	264.812	0.123551	268.75	102.375	97241.2	5.04017	0.00372228
15.2972	0.128083	432.096	300.312	0.0739708	288.875	53.0625	96770.3	5.04017	0.00467466
17.7267	0.1753	432.096	295.562	0.150719	349.875	71.0312	96479.1	5.04017	0.00525672
17.208	0.132083	432.096	310.688	0.164495	441.25	67.2188	96666.6	5.04017	0.00473172
19.2775	0.125542	432.096	323.5	0.147009	432.125	64.625	95915.9	5.60866	0.00487603
16.0094	0.132	432.096	349.594	0.142521	427.125	62.1562	96156.2	5.60866	0.00647372
16.2184	0.167	432.096	338.156	0.123954	488.125	63.4688	96247.5	5.60866	0.00640897
17.4124	0.1395	432.096	320.688	0.240418	523.875	79.125	96274.4	5.60866	0.00497497
18.3621	0.1865	432.096	352.219	0.203154	525.5	68.7812	95935.6	4.97966	0.00780216
15.8327	0.1835	432.096	343.969	0.252502	561.375	68.9375	95823.4	4.97966	0.00815353
17.9808	0.177	432.096	372.156	0.201138	546.125	73.8125	95047.5	4.97966	0.0102403
18.3741	0.139667	432.096	362.656	0.280113	526.75	72.8438	95719.7	4.97966	0.00814444
21.4601	0.118333	432.096	349.781	0.273422	596	78.1875	95680.9	5.34994	0.00739344
25.4283	0.155958	432.096	362.406	0.292106	608.875	80.875	95217.2	5.34994	0.00713328
25.4798	0.227167	432.096	389.312	0.235379	650.625	70.7812	95409.7	5.34994	0.00813713
20.0729	0.139071	432.096	381.812	0.324552	678.75	77.5938	95474.1	5.34994	0.00546653
21.3304	0.173	432.096	360.219	0.234263	697.25	60.8438	96061.2	4.81289	0.00600934
19.8654	0.137619	432.096	328.469	0.289039	691.875	66.5625	95907.5	4.81289	0.00563938
20.9271	0.1425	432.096	365	0.282186	682.625	56.0312	96347.2	4.81289	0.00910306
21.1043	0.159625	432.096	343.688	0.255456	656.875	53.8438	96645.6	4.96091	0.00718878
19.8766	0.175167	432.096	306.688	0.249593	613.875	48.5625	96854.7	4.96091	0.00565588
17.5543	0.084375	432.096	305.25	0.170543	579.625	37.9688	96488.4	4.96091	0.00557753
14.1949	0.128833	432.096	280.594	0.222666	582	44.875	97375.6	4.96091	0.00420322
18.9202	0.1348	432.096	282.531	0.246965	561.25	37.625	97013.4	5.33214	0.00468066
13.5839	0.14	432.096	288.406	0.187636	405.125	33.5625	97090.6	5.33214	0.00438212
10.18	0.1418	432.096	272.312	0.17445	297.75	34.5938	97520	5.33214	0.00350394
13.8493	0.153	432.096	259.25	0.173959	270.75	23.25	97599.4	5.33214	0.0033795
17.3502	0.19125	432.096	252.781	0.164498	62.375	24.1562	97137.2	4.04023	0.00298647
19.7974	0.162	432.096	250.469	0.0798724	1.125	21.4688	96891.2	4.04023	0.00363506
18.0447	0.2325	432.096	231	0.0209775	0	55.6875	97919.7	4.04023	0.00237378
18.7002	0.117	432.096	232.781	0.0519006	0	23.0938	97455.3	4.04023	0.00274962
14.3924		432.096	239.719	0.0804495	0	39.4688	97772.5	3.86191	0.00248816
78.5951		432.096	207.281	0.0288739	0	54.3438	97891.2	3.86191	0.00117566
75.3177		432.096	196.75	0.00658275	0	50.375	97840.6	3.86191	0.00159244
35.2857		432.096	213.625	0.0191455	0	50.5312	97651.2	3.86191	0.00197931
31.8585		432.096	206.438	0.00465316	0	60.0625	97778.8	4.42178	0.00146122
29.2135		432.096	209.594	0.0126885	0	70.875	98481.2	4.42178	0.000960406
61.2812		432.096	203.812	0.00933362	0	87	98110	4.42178	0.0008
58.8906		432.096	209.062	0.0107403	0	88.0312	98299.4	4.42178	0.00136556
43.0573		432.096	204.719	0.0167343	0	105.188	98120.3	3.80075	0.00108994
34.35		432.096	210.812	0.0143373	0	126.312	98485.9	3.80075	0.000833906
110.384	0.3181	905.056	235.188	0.0372049	417.375	30.4375	90884.1	4.32918	0.00192644
84.261	0.22825	905.056	242.688	0.0334628	414.125	30.1875	91029.4	4.32918	0.00200644
68.8885	0.299643	905.056	250.188	0.0541393	411.25	36.1562	91025	4.32918	0.00190269
58.0563	0.28375	905.056	285.094	0.0437871	404.375	34.375	90139.4	4.32918	0.00291844
91.8541	0.167567	905.056	264.812	0.080825	379.125	40.2812	90758.4	4.50112	0.00240003
78.0228	0.4537	905.056	300.312	0.0537604	409	39.4062	90736.9	4.50112	0.00340672
38.7982	0.0828571	905.056	295.562	0.151655	412.25	44.9375	90698.8	4.50112	0.00377266
39.4079	0.217	905.056	310.688	0.0956632	430.625	39.75	90576.2	4.50112	0.00383156
	0.179429	905.056	323.5	0.194425	420.5	47.0938	90129.7	5.04242	0.00425416
	0.12575	905.056	349.594	0.138178	121	39.7812	90166.9	5.04242	0.00610719
	0.0998333	905.056	338.156	0.12773	90.125	41.9375	90214.7	5.04242	0.00651725
	0.121583	905.056	320.688	0.20729	163.125	47.375	90439.7	5.04242	0.00543125
47.7609	0.166222	905.056	352.219	0.164444	179	43.25	90105.6	4.67311	0.00672863
28.8395	0.128333	905.056	343.969	0.197106	175.125	45.0312	90005.6	4.67311	0.00695087
27.0729	0.223333	905.056	372.156	0.183892	159	37.5312	89473.1	4.67311	0.00868347
27.7243	0.1466	905.056	362.656	0.199246	193.75	49.5625	89982.2	4.67311	0.00705944
34.0156	0.143167	905.056	349.781	0.253888	335.875	50.3438	89884.4	4.66488	0.00543878
22.971	0.173333	905.056	362.406	0.208454	411	54.75	89692.8	4.66488	0.00505103
29.3023	0.231	905.056	389.312	0.177098	411.125	36.375	89574.7	4.66488	0.00774003
25.1476	0.195125	905.056	381.812	0.20999	423.625	41.4688	89868.4	4.66488	0.00739609
28.2636	0.18225	905.056	360.219	0.172963	448	41.7188	90130	4.70865	0.00648388
65.6366	0.689111	905.056	328.469	0.181522	488.625	48.1562	90135.3	4.70865	0.00407597
36.8098	0.3723	905.056	365	0.170505	487.125	34.0625	90075.9	4.70865	0.00662388
25.5839	0.1533	905.056	343.688	0.242493	449.375	31.625	90605.9	4.31599	0.00786709
24.2129	0.167083	905.056	306.688	0.209806	444.75	37.5625	90956.2	4.31599	0.00507541
30.3916	0.175524	905.056	305.25	0.138155	448.375	33.7812	90451.6	4.31599	0.00491497
51.5153	0.443083	905.056	280.594	0.172786	464.875	30.8125	91066.2	4.31599	0.00315941
86.485	0.250812	905.056	282.531	0.186194	489.125	32.7188	91104.1	3.86276	0.00295581
57.2545	0.1757	905.056	288.406	0.129163	489.625	27.25	90886.2	3.86276	0.00343784
52.5367	0.249125	905.056	272.312	0.135414	476.625	22.75	91144.1	3.86276	0.00374178
40.5327	0.148375	905.056	259.25	0.107213	465.5	21.375	91294.1	3.86276	0.00300009
48.116	0.1756	905.056	252.781	0.104877	461.125	20	91029.7	2.98042	0.00349797
62.5816	0.140333	905.056	250.469	0.113567	457.5	15.9062	90728.4	2.98042	0.00285197
68.0295	0.230048	905.056	231	0.113128	454.875	18.3438	91596.2	2.98042	0.00290431
79.6998	0.219333	905.056	232.781	0.0549005	446.25	16.6562	91401.6	2.98042	0.00257419
58.7908	0.213167	905.056	239.719	0.000601348	431	13.0312	91290.3	2.45226	0.00233906
44.2158		905.056	207.281	0.00657791	415	28.1562	91840.3	2.45226	0.00153872
93.9107		905.056	196.75	0.00590627	399.625	36.4688	91960	2.45226	0.00138803
101.725		905.056	213.625	0.0103961	386.857	34.9688	91535.9	2.45226	0.00187216
106.346		905.056	206.438	0.0150808	373	39.0625	91436.9	2.45396	0.00178219
68.4792		905.056	209.594	0.0168113	357.25	36.5312	91773.4	2.45396	0.0017645
65.2798		905.056	203.812	0.0226305	341	32.2812	91710	2.45396	0.00147925
63.881		905.056	209.062	0.0279269	324	38.7812	92078.8	2.45396	0.00172891
77.7865		905.056	204.719	0.0254126	314.333	23.2812	91505	2.8339	0.00167438
123.993	0.403	905.056	210.812	0.0481304	317	27.4375	91930.6	2.8339	0.0017875
84.6125	0.36025	905.056	235.188	0.0426289	414.375	30.4375	90884.1	4.41744	0.00192644
62.7443	0.2385	905.056	242.688	0.0352175	411.125	30.1875	91029.4	4.41744	0.00200644
73.6148	0.302333	905.056	250.188	0.057056	408.25	36.1562	91025	4.41744	0.00190269
50.6454	0.36	905.056	285.094	0.0348402	401.125	34.375	90139.4	4.41744	0.00291844
81.0187	0.199417	905.056	264.812	0.0677552	381	40.2812	90758.4	4.57952	0.00240003
90.2421	0.717375	905.056	300.312	0.0470529	413.125	39.4062	90736.9	4.57952	0.00340672
44.4661	0.0743055	905.056	295.562	0.11493	422	44.9375	90698.8	4.57952	0.00377266
49.8701	0.25425	905.056	310.688	0.0987129	440.875	39.75	90576.2	4.57952	0.00383156
54.6228	0.194583	905.056	323.5	0.135446	430.625	47.0938	90129.7	5.12272	0.00425416
51.7585	0.141	905.056	349.594	0.093556	140.25	39.7812	90166.9	5.12272	0.00610719
27.107	0.133167	905.056	338.156	0.112431	143.125	41.9375	90214.7	5.12272	0.00651725
37.8665	0.168333	905.056	320.688	0.198262	198	47.375	90439.7	5.12272	0.00543125
43.0842	0.165417	905.056	352.219	0.169482	208.25	43.25	90105.6	4.73141	0.00672863
31.3376	0.190333	905.056	343.969	0.115024	198	45.0312	90005.6	4.73141	0.00695087
28.0809	0.228	905.056	372.156	0.180718	184.125	37.5312	89473.1	4.73141	0.00868347
42.4688	0.16	905.056	362.656	0.129813	218.25	49.5625	89982.2	4.73141	0.00705944
31.3931	0.156875	905.056	349.781	0.194676	350.875	50.3438	89884.4	4.69742	0.00543878
22.4056	0.185625	905.056	362.406	0.194923	421.25	54.75	89692.8	4.69742	0.00505103
29.0917	0.276875	905.056	389.312	0.157467	420.25	36.375	89574.7	4.69742	0.00774003
26.2207	0.202292	905.056	381.812	0.180738	429.5	41.4688	89868.4	4.69742	0.00739609
28.8284	0.191833	905.056	360.219	0.148919	452.875	41.7188	90130	4.79339	0.00648388
72.8403	0.721071	905.056	328.469	0.16303	489.375	48.1562	90135.3	4.79339	0.00407597
38.5294	0.4013	905.056	365	0.176025	484.25	34.0625	90075.9	4.79339	0.00662388
21.189	0.1886	905.056	343.688	0.144569	439.125	31.625	90605.9	4.33511	0.00786709
25.3925	0.191	905.056	306.688	0.141032	441.875	37.5625	90956.2	4.33511	0.00507541
28.7427	0.195952	905.056	305.25	0.149549	447.25	33.7812	90451.6	4.33511	0.00491497
60.8191	0.468738	905.056	280.594	0.11902	462.5	30.8125	91066.2	4.33511	0.00315941
74.7676	0.325375	905.056	282.531	0.155957	484.75	32.7188	91104.1	3.90177	0.00295581
42.7432	0.227952	905.056	288.406	0.0778886	483.5	27.25	90886.2	3.90177	0.00343784
49.9995	0.327709	905.056	272.312	0.150595	468.625	22.75	91144.1	3.90177	0.00374178
39.4281	0.176125	905.056	259.25	0.0661107	459.5	21.375	91294.1	3.90177	0.00300009
43.2389	0.211	905.056	252.781	0.0699198	455.125	20	91029.7	3.04146	0.00349797
49.495	0.16625	905.056	250.469	0.0899502	451.5	15.9062	90728.4	3.04146	0.00285197
55.1711	0.229929	905.056	231	0.0967201	449.375	18.3438	91596.2	3.04146	0.00290431
60.6586	0.197333	905.056	232.781	0.0688329	441.75	16.6562	91401.6	3.04146	0.00257419
46.6501	0.190875	905.056	239.719	0.00197125	427	13.0312	91290.3	2.49298	0.00233906
24.8926		905.056	207.281	0.00739883	411	28.1562	91840.3	2.49298	0.00153872
81.0556		905.056	196.75	0.0130946	396.875	36.4688	91960	2.49298	0.00138803
72.3869		905.056	213.625	0.0102412	384.857	34.9688	91535.9	2.49298	0.00187216
75.9518		905.056	206.438	0.0178613	371	39.0625	91436.9	2.51786	0.00178219
41.2292		905.056	209.594	0.0205366	354.5	36.5312	91773.4	2.51786	0.0017645
52.4323		905.056	203.812	0.0133752	339.5	32.2812	91710	2.51786	0.00147925
47.1667		905.056	209.062	0.0292131	325.125	38.7812	92078.8	2.51786	0.00172891
67.3333		905.056	204.719	0.0381647	317	23.2812	91505	2.86051	0.00167438
110.542	0.379	905.056	210.812	0.0499655	320.5	27.4375	91930.6	2.86051	0.0017875
89.8893	0.385	905.056	247.781	0.0540101	418.375	30.4375	90884.1	4.41744	0.00192644
64.3286	0.19575	905.056	263.719	0.0429271	415.125	30.1875	91029.4	4.41744	0.00200644
71.6426	0.250083	905.056	275.531	0.0617916	412.25	36.1562	91025	4.41744	0.00190269
48.7351	0.358667	905.056	312.438	0.0376553	405.125	34.375	90139.4	4.41744	0.00291844
76.1454	0.221571	905.056	281.219	0.0808323	385.625	40.2812	90758.4	4.57952	0.00240003
75.3377	0.69725	905.056	324.781	0.0477442	418.125	39.4062	90736.9	4.57952	0.00340672
20.9384	0.0614524	905.056	331.719	0.115825	428.5	44.9375	90698.8	4.57952	0.00377266
31.8565	0.226667	905.056	334.5	0.0980815	447.75	39.75	90576.2	4.57952	0.00383156
36.8619	0.195583	905.056	349.25	0.146127	436.875	47.0938	90129.7	5.12272	0.00425416
42.1128	0.142917	905.056	378.312	0.104261	147.25	39.7812	90166.9	5.12272	0.00610719
25.75	0.141722	905.056	376.969	0.12927	126.75	41.9375	90214.7	5.12272	0.00651725
23.7161	0.1429	905.056	351.656	0.178609	209.625	47.375	90439.7	5.12272	0.00543125
33.0097	0.157139	905.056	390.281	0.165168	218.5	43.25	90105.6	4.73141	0.00672863
16.7805	0.163083	905.056	386.062	0.151867	204.125	45.0312	90005.6	4.73141	0.00695087
21.9348	0.166333	905.056	408.875	0.23242	189.375	37.5312	89473.1	4.73141	0.00868347
27.6	0.187625	905.056	403.562	0.114289	223.25	49.5625	89982.2	4.73141	0.00705944
23.4384	0.1595	905.056	391.938	0.246232	354.75	50.3438	89884.4	4.69742	0.00543878
21.0197	0.179396	905.056	401.312	0.200888	424.375	54.75	89692.8	4.69742	0.00505103
25.9443	0.288375	905.056	434.156	0.174945	424.375	36.375	89574.7	4.69742	0.00774003
22.6837	0.234958	905.056	396.75	0.188851	435.25	41.4688	89868.4	4.69742	0.00739609
25.2228	0.190833	905.056	386.594	0.184319	459	41.7188	90130	4.79339	0.00648388
75.4654	0.700524	905.056	361.938	0.166049	494.875	48.1562	90135.3	4.79339	0.00407597
34.7039	0.37675	905.056	395.594	0.200019	490	34.0625	90075.9	4.79339	0.00662388
17.5737	0.198033	905.056	372.5	0.158151	447.5	31.625	90605.9	4.33511	0.00786709
20.2867	0.196	905.056	335.406	0.211836	449.625	37.5625	90956.2	4.33511	0.00507541
21.6892	0.197738	905.056	334.219	0.161961	454.25	33.7812	90451.6	4.33511	0.00491497
54.7045	0.491714	905.056	305.5	0.173352	467.75	30.8125	91066.2	4.33511	0.00315941
75.32	0.33	905.056	308.219	0.159806	488.75	32.7188	91104.1	3.90177	0.00295581
31.0295	0.229972	905.056	317.438	0.129533	486.5	27.25	90886.2	3.90177	0.00343784
42.9572	0.334	905.056	296.062	0.167834	471.625	22.75	91144.1	3.90177	0.00374178
30.0321	0.2021	905.056	274.938	0.0963984	463.5	21.375	91294.1	3.90177	0.00300009
30.2152	0.1883	905.056	270.594	0.0898553	459.125	20	91029.7	3.04146	0.00349797
37.0729	0.184	905.056	274.062	0.126258	455.5	15.9062	90728.4	3.04146	0.00285197
38.7603	0.220857	905.056	263.812	0.142208	453.375	18.3438	91596.2	3.04146	0.00290431
42.1159	0.173445	905.056	260.875	0.0810526	445.75	16.6562	91401.6	3.04146	0.00257419
35.2309	0.180625	905.056	254.844	0.00277144	431	13.0312	91290.3	2.49298	0.00233906
17.6645		905.056	217.75	0.0107838	415	28.1562	91840.3	2.49298	0.00153872
54.0052		905.056	231.062	0.0120757	400.875	36.4688	91960	2.49298	0.00138803
53.2448		905.056	241.281	0.0168779	388.857	34.9688	91535.9	2.49298	0.00187216
59.345		905.056	231.625	0.0179383	375	39.0625	91436.9	2.51786	0.00178219
38.276		905.056	222.125	0.0223406	358.5	36.5312	91773.4	2.51786	0.0017645
46.901		905.056	215.688	0.0183345	343.5	32.2812	91710	2.51786	0.00147925
43.4306		905.056	225.625	0.0291049	329.125	38.7812	92078.8	2.51786	0.00172891
77.2083		905.056	222.906	0.0436073	321	23.2812	91505	2.86051	0.00167438
143.399		905.056	232.625	0.0684867	324.5	27.4375	91930.6	2.86051	0.0017875
51.3576	0.164024	-292	340.469	0.104185	625.75	57.9688	105802	4.00154	0.00170269
50.9671	0.171667	-292	359.5	0.0633363	631.875	61.9062	105797	4.00154	0.00193388
46.2131	0.168381	-292	370.844	0.0875282	633.75	66.7812	105722	4.00154	0.00280119
66.5442	0.12	-292	405.312	0.0271882	636.25	61.4062	104527	4.00154	0.0032145
70.9766	0.193467	-292	381.156	0.0945912	652.375	75.1875	105453	4.47797	0.00256953
43.2378	0.182833	-292	429.938	0.161928	666.5	75.7188	104936	4.47797	0.00335616
28.4168	0.127542	-292	430.125	0.18111	692.875	80.2812	104892	4.47797	0.00462834
82.5983	0.151967	-292	446.656	0.188177	690.375	82.75	104617	4.47797	0.00372531
40.4383	0.132889	-292	445.938	0.202953	703	83.625	104117	4.74863	0.00553816
57.5388	0.22025	-292	467.594	0.248129	692.125	77.9375	104064	4.74863	0.00648153
46.4938	0.128389	-292	466.969	0.21891	696.75	80.4375	104095	4.74863	0.00671756
38.8655	0.175771	-292	458.062	0.275554	717.25	88.7188	104411	4.74863	0.00536141
58.2113	0.143625	-292	484.344	0.205072	683.625	83.8125	103931	4.33844	0.00762894
23.1635	0.1753	-292	474.938	0.190548	641.375	77.6875	103789	4.33844	0.00740678
16.712	0.1925	-292	492.656	0.134689	605.75	79.625	103004	4.33844	0.00877647
13.5196	0.1704	-292	502.438	0.260724	630	88.0625	103637	4.33844	0.00873994
21.6741	0.1512	-292	496.688	0.250407	684.875	87.75	103498	4.43708	0.00706606
15.619	0.170583	-292	514.938	0.266416	706.5	91.5312	103153	4.43708	0.00683003
42.5774	0.214967	-292	527.469	0.215123	712.125	78	102892	4.43708	0.00912609
21.6114	0.1635	-292	508.219	0.148116	696.25	86.6562	103357	4.43708	0.00681978
30.7565	0.172	-292	489.312	0.268514	679.75	79.0938	103797	5.48743	0.00621656
33.3619	0.113267	-292	473.562	0.221668	702.875	82.9062	103847	5.48743	0.00565766
67.9936		-292	498.656	0.152248	703.5	70.7188	103722	5.48743	0.00644341
23.554	0.2116	-292	454.219	0.24932	685.5	61.4688	104498	4.62631	0.00657231
43.7819	0.177571	-292	430.812	0.263987	661.625	68.9062	105038	4.62631	0.00517369
21.8228	0.137786	-292	421.219	0.199182	658.625	64.5938	104526	4.62631	0.00570397
26.7868	0.177167	-292	397.406	0.167302	668	58.8438	105450	4.62631	0.00382359
51.3642	0.242667	-292	401.562	0.218145	678.25	58.6875	105356	3.9368	0.00469625
41.0589	0.177233	-292	396.656	0.138193	679	50.6875	105173	3.9368	0.00501822
49.2855	0.233458	-292	372.5	0.153923	678	44.0625	105646	3.9368	0.00388194
53.0755	0.160042	-292	351.406	0.0772444	673.375	43.5625	105972	3.9368	0.00306213
68.3669	0.2633	-292	337.938	0.103356	662.5	37.0938	105749	2.94026	0.00308194
73.6596	0.283	-292	339.719	0.0512873	654.25	31.875	105393	2.94026	0.00335966
95.2489	0.257542	-292	330.438	0.116165	651.375	30.25	106407	2.94026	0.00289675
103.278	0.186056	-292	328.656	0.0885169	644.5	31.375	106169	2.94026	0.00297019
85.5022	0.156033	-292	323.781	0.0956261	636.5	27.5	106222	3.56616	0.00237206
73.5447	0.194833	-292	294.031	0.0862684	628.5	29.9688	107116	3.56616	0.00145909
121.875	0.352833	-292	300.781	0.0508091	620	28.125	107094	3.56616	0.00195734
191.146	0.3612	-292	310.812	0.0670033	611	28.2812	106566	3.56616	0.00226825
146.179	0.222944	-292	307.031	0.0951492	604	31.8438	106581	2.33133	0.001927
98.6875	0.222416	-292	299.844	0.0345988	596.5	35.2812	107200	2.33133	0.00153806
74.1597		-292	293.031	0.0331139	588.5	37.0938	107217	2.33133	0.00174528
71.0573		-292	300.625	0.108412	580.875	40.875	107452	2.33133	0.00211591
83.901	0.341833	-292	309.438	0.0626101	578.333	46.4688	106862	3.23158	0.00186875
83.3229	0.140333	-292	317.406	0.100297	578.5	51.125	107108	3.23158	0.00199363
54.5817	0.153062	-183.456	245.969	0.112182	625.75	55.6562	104368	4.00154	0.00166331
62.1637	0.155267	-183.456	261.969	0.07209	631.875	59.3438	104378	4.00154	0.00183303
59.9817	0.15931	-183.456	273.906	0.0908172	633.75	64.1562	104307	4.00154	0.00261212
85.908	0.113	-183.456	310.594	0.0281522	636.25	58.5	103164	4.00154	0.00311084
93.91	0.207	-183.456	280.625	0.102234	652.375	72.0938	104042	4.47797	0.00250419
60.8658	0.190083	-183.456	323.062	0.170437	666.5	72.0625	103572	4.47797	0.00337706
39.5419	0.1651	-183.456	329.719	0.228569	692.875	77.5	103524	4.47797	0.00466503
117.138	0.1507	-183.456	332.344	0.224801	690.375	79.4688	103272	4.47797	0.0036925
62.8705	0.178445	-183.456	349.156	0.247623	703	81	102765	4.74863	0.00527709
121.547	0.239875	-183.456	377.812	0.294895	692.125	73.9688	102734	4.74863	0.00635459
43.9866	0.144833	-183.456	374.969	0.270359	696.75	76.4688	102762	4.74863	0.00659506
42.0956	0.158	-183.456	348.812	0.339944	717.25	84.4062	103054	4.74863	0.00509906
31.8261	0.1495	-183.456	387	0.237994	683.625	82	102607	4.33844	0.00753713
25.0525	0.245958	-183.456	383.781	0.249662	641.375	75.625	102467	4.33844	0.00735138
16.9287	0.172	-183.456	407.594	0.170592	605.75	74.9375	101700	4.33844	0.00897419
17.975	0.146125	-183.456	398.281	0.366862	630	85.2812	102325	4.33844	0.00856981
24.3059	0.151533	-183.456	389.375	0.319459	684.875	84.5312	102184	4.43708	0.00700116
26.3624	0.160167	-183.456	396.625	0.364178	706.5	89.5938	101862	4.43708	0.00658191
51.2111	0.2086	-183.456	433.5	0.311201	712.125	73.7812	101622	4.43708	0.0091705
26.9914	0.1404	-183.456	394.594	0.165679	696.25	84.3438	102060	4.43708	0.00665281
41.3962	0.174625	-183.456	383.812	0.309111	679.75	76.375	102495	5.48743	0.00607056
33.4056	0.156167	-183.456	360.562	0.274559	702.875	80.5938	102532	5.48743	0.00532641
64.2375	0.3615	-183.456	394.5	0.187176	703.5	67.1562	102432	5.48743	0.00640112
25.309	0.204267	-183.456	371.656	0.341859	685.5	59.0625	103157	4.62631	0.00648156
42.2482	0.172071	-183.456	334.906	0.295373	661.625	66.1875	103682	4.62631	0.00488897
24.0738	0.125571	-183.456	334.094	0.228559	658.625	62.2188	103169	4.62631	0.00503834
26.6147	0.163917	-183.456	305.969	0.23681	668	56.0312	104075	4.62631	0.00328991
53.5983	0.223357	-183.456	306.219	0.218109	678.25	56.7812	103988	3.9368	0.00349378
44.7538	0.168767	-183.456	317	0.16038	679	48.4062	103808	3.9368	0.004165
50.9816	0.198792	-183.456	295.656	0.170569	678	42.0625	104258	3.9368	0.00329944
49.3096	0.1355	-183.456	273.938	0.0592594	673.375	41.9688	104566	3.9368	0.00262666
78.9642	0.225333	-183.456	269.594	0.122189	662.5	35.6562	104333	2.94026	0.00315222
79.7572	0.279	-183.456	273.781	0.0576648	654.25	30.0938	103975	2.94026	0.00329413
100.223	0.243167	-183.456	263.656	0.128568	651.375	28.8125	104972	2.94026	0.00265175
125.361	0.211262	-183.456	259.281	0.0870762	644.5	30.1562	104738	2.94026	0.00297181
120.805	0.135833	-183.456	254.344	0.100033	636.5	26.1875	104790	3.56616	0.00212922
78.9583	0.210889	-183.456	214.625	0.0644057	628.5	28.875	105638	3.56616	0.00135778
145.682	0.361333	-183.456	229.25	0.0788138	620	26.9062	105619	3.56616	0.00187863
205.78	0.362	-183.456	239.656	0.0775009	611	26.875	105108	3.56616	0.00212691
175.602	0.232167	-183.456	229.438	0.102537	604	30.625	105118	2.33133	0.00181516
109.399	0.211084	-183.456	220.5	0.0153125	596.5	32.4688	105711	2.33133	0.00149181
86.119		-183.456	213.688	0.0196654	588.5	35.4375	105726	2.33133	0.00167675
77.3073		-183.456	223.906	0.0708255	580.875	39.1875	105963	2.33133	0.0020185
96.9323	0.261	-183.456	220.094	0.0871534	578.333	44.6562	105395	3.23158	0.00184022
88.4167	0.062	-183.456	230.688	0.126094	578.5	49.2812	105635	3.23158	0.00186087
33.3197	0.0968334	675.168	217.812	0.108013	659.125	51.6875	94000.9	4.1967	0.00126994
54.3535	0.243929	675.168	237.531	0.102475	663.375	56.75	94030.9	4.1967	0.00152975
32.3435	0.148667	675.168	248.469	0.101034	672.875	59.7188	94079.1	4.1967	0.00173522
89.1325	0.101167	675.168	291.719	0.0578355	671.875	59.0625	93077.8	4.1967	0.00305716
41.9103	0.1036	675.168	260.094	0.105316	684.5	63.7188	93817.8	4.5563	0.00228941
42.3287	0.223778	675.168	295.094	0.118295	689.125	66.5	93645	4.5563	0.00289991
26.8779	0.1292	675.168	298.031	0.175206	696.75	69.9062	93671.2	4.5563	0.00388262
72.3634	0.112861	675.168	299.562	0.20962	702.125	78.4062	93398.1	4.5563	0.00276191
31.806	0.11775	675.168	310.688	0.167468	718.75	70.4375	93087.5	4.828	0.00364572
25.0678	0.127667	675.168	342.031	0.191732	725.875	72.75	92970.6	4.828	0.00544175
26.3659	0.165433	675.168	340.906	0.212624	719.75	78.8125	92980.9	4.828	0.005728
21.6162	0.1484	675.168	322.219	0.257424	724.25	79.5625	93267.5	4.828	0.00456138
20.2592	0.1186	675.168	348.562	0.238022	675.25	79.25	92963.8	4.3572	0.00568944
26.794	0.231625	675.168	353.688	0.1887	588.375	78.1562	92769.1	4.3572	0.00627356
31.1046	0.172625	675.168	376.125	0.162844	554	73.4375	92210.3	4.3572	0.00831259
25.3035	0.225	675.168	377.312	0.256063	579.375	70.2188	92815.9	4.3572	0.00924334
17.4746	0.126429	675.168	344.562	0.351561	641.875	81.1875	92658.1	4.80577	0.00530459
14.3587	0.153095	675.168	367.125	0.271708	668.375	81.5625	92603.1	4.80577	0.0060775
20.0668	0.111167	675.168	395.625	0.248632	680.875	76.8125	92236.9	4.80577	0.00687325
19.9198	0.17075	675.168	362.375	0.310428	709.75	77.1875	92633.1	4.80577	0.00517638
23.4335	0.167444	675.168	353.781	0.308189	731.625	76.375	92823.4	5.51647	0.00534559
50.8663	0.167437	675.168	325.5	0.241832	750.5	76.875	93026.2	5.51647	0.00346997
25.7354	0.196917	675.168	362.312	0.237394	753	67.7812	92787.2	5.51647	0.00537519
27.939	0.15425	675.168	349.875	0.312757	742.5	56.9375	93381.9	3.90321	0.00586741
19.7878	0.143389	675.168	309.375	0.281771	751.375	57.25	93834.1	3.90321	0.00404125
19.863	0.13425	675.168	301.719	0.262607	753.625	57.4062	93314.7	3.90321	0.00333138
28.2932	0.142533	675.168	278.219	0.234103	755.25	55.3125	93965.3	3.90321	0.00256709
44.4837	0.192809	675.168	276.312	0.271147	759	52.4062	94085.3	3.57509	0.00232547
26.542	0.123429	675.168	282.656	0.23005	758.125	47.0625	93849.1	3.57509	0.00251269
28.3886	0.166333	675.168	272.812	0.19516	757.125	41.25	94071.2	3.57509	0.00294028
38.7649	0.125467	675.168	261.875	0.154575	754.375	33.4688	94326.2	3.57509	0.00264963
46.6467	0.152375	675.168	253.281	0.0948125	751.25	33.3438	94039.4	2.37124	0.00225694
48.9676	0.14675	675.168	257.281	0.106763	743.875	26.75	93725.6	2.37124	0.00285497
48.5105	0.1935	675.168	240.844	0.146539	738.25	24.7188	94625.6	2.37124	0.00243806
57.1555	0.142945	675.168	227.875	0.122939	730.5	25.7188	94450	2.37124	0.00202669
48.319	0.126028	675.168	225.031	0.153217	722.5	24.9062	94324.4	1.9557	0.00195609
31.6806	0.129767	675.168	194.094	0.12795	714.5	25.25	94960	1.9557	0.00128363
57.0938	0.213222	675.168	200.156	0.106504	706.5	24.75	95014.7	1.9557	0.00133138
67.776	0.176875	675.168	210.625	0.0939728	696.429	25	94629.7	1.9557	0.00151616
47.812	0.118375	675.168	206.562	0.113732	689	26.25	94555.3	2.30668	0.00156497
34.3073	0.168333	675.168	203.156	0.106505	681.5	30	94957.2	2.30668	0.00122747
45.5	0.151694	675.168	184.281	0.0679595	673.5	33.3438	94973.1	2.30668	0.00096175
43.5208	0.15825	675.168	202.312	0.096348	665.625	55.4688	95237.2	2.30668	0.00136922
48.25	0.194733	675.168	195.688	0.104706	662.333	39.6875	94680.9	2.49025	0.00109263
46.5625	0.143429	675.168	201.5	0.0925107	662	45.125	95006.6	2.49025	0.0010785
34.1603	0.091881	675.168	217.812	0.0979694	659.375	51.6875	94000.9	4.26545	0.00126994
47.9099	0.242286	675.168	237.531	0.0794103	662.5	56.75	94030.9	4.26545	0.00152975
31.7353	0.0919168	675.168	248.469	0.0680972	671.875	59.7188	94079.1	4.26545	0.00173522
89.2042	0.158389	675.168	291.719	0.042814	670.875	59.0625	93077.8	4.26545	0.00305716
35.6646	0.119033	675.168	260.094	0.0681946	683	63.7188	93817.8	4.66326	0.00228941
40.469	0.229778	675.168	295.094	0.0904124	687.125	66.5	93645	4.66326	0.00289991
25.8688	0.1398	675.168	298.031	0.12977	693.75	69.9062	93671.2	4.66326	0.00388262
43.7716	0.120305	675.168	299.562	0.122661	699.75	78.4062	93398.1	4.66326	0.00276191
26.1616	0.140125	675.168	310.688	0.130054	716.125	70.4375	93087.5	4.90232	0.00364572
22.8224	0.150833	675.168	342.031	0.128312	720.875	72.75	92970.6	4.90232	0.00544175
20.6069	0.180767	675.168	340.906	0.151169	715.375	78.8125	92980.9	4.90232	0.005728
19.7269	0.1439	675.168	322.219	0.173051	718.75	79.5625	93267.5	4.90232	0.00456138
22.0139	0.1371	675.168	348.562	0.155223	672.25	79.25	92963.8	4.39787	0.00568944
23.0183	0.193333	675.168	353.688	0.115911	590.75	78.1562	92769.1	4.39787	0.00627356
29.9988	0.166292	675.168	376.125	0.143368	558	73.4375	92210.3	4.39787	0.00831259
25.5372	0.222666	675.168	377.312	0.198731	581.125	70.2188	92815.9	4.39787	0.00924334
18.2689	0.122476	675.168	344.562	0.244632	640.75	81.1875	92658.1	4.85184	0.00530459
20.8526	0.15875	675.168	367.125	0.17182	667.125	81.5625	92603.1	4.85184	0.0060775
25.1771	0.156	675.168	395.625	0.169821	678.25	76.8125	92236.9	4.85184	0.00687325
23.8167	0.170805	675.168	362.375	0.220312	705.75	77.1875	92633.1	4.85184	0.00517638
22.2971	0.178095	675.168	353.781	0.199753	728.5	76.375	92823.4	5.50654	0.00534559
44.1112	0.158375	675.168	325.5	0.217191	747.5	76.875	93026.2	5.50654	0.00346997
8.72628	0.208733	675.168	362.312	0.180704	750	67.7812	92787.2	5.50654	0.00537519
10.2497	0.158583	675.168	349.875	0.219144	738.5	56.9375	93381.9	3.99778	0.00586741
11.8646	0.160024	675.168	309.375	0.208999	747.375	57.25	93834.1	3.99778	0.00404125
13.9487	0.138405	675.168	301.719	0.190139	749.625	57.4062	93314.7	3.99778	0.00333138
28.4059	0.173667	675.168	278.219	0.163169	751.25	55.3125	93965.3	3.99778	0.00256709
48.5816	0.196524	675.168	276.312	0.15702	755	52.4062	94085.3	3.66869	0.00232547
26.273	0.127452	675.168	282.656	0.158765	754.125	47.0625	93849.1	3.66869	0.00251269
26.7492	0.17625	675.168	272.812	0.163922	753.125	41.25	94071.2	3.66869	0.00294028
38.5556	0.149694	675.168	261.875	0.108026	750.375	33.4688	94326.2	3.66869	0.00264963
43.0601	0.160458	675.168	253.281	0.0919531	747.25	33.3438	94039.4	2.4083	0.00225694
51.8802	0.164	675.168	257.281	0.0781525	739.875	26.75	93725.6	2.4083	0.00285497
52.1542	0.199625	675.168	240.844	0.112332	734.25	24.7188	94625.6	2.4083	0.00243806
52.024	0.0989167	675.168	227.875	0.0947248	726.5	25.7188	94450	2.4083	0.00202669
51.2974	0.123555	675.168	225.031	0.113316	718.5	24.9062	94324.4	2.0399	0.00195609
35.5299	0.142633	675.168	194.094	0.106008	710.5	25.25	94960	2.0399	0.00128363
61.1562	0.221917	675.168	200.156	0.0660718	702.5	24.75	95014.7	2.0399	0.00133138
69.3125	0.1699	675.168	210.625	0.079482	692.429	25	94629.7	2.0399	0.00151616
47.2645	0.10225	675.168	206.562	0.0761205	685	26.25	94555.3	2.30566	0.00156497
33.5417	0.21875	675.168	203.156	0.104416	677.5	30	94957.2	2.30566	0.00122747
42.8631	0.153139	675.168	184.281	0.0447892	669.5	33.3438	94973.1	2.30566	0.00096175
40.5521	0.16075	675.168	202.312	0.0766969	661.625	55.4688	95237.2	2.30566	0.00136922
50.9792	0.171667	675.168	195.688	0.0741318	658.333	39.6875	94680.9	2.54487	0.00109263
42.3594	0.156429	675.168	201.5	0.0896947	658	45.125	95006.6	2.54487	0.0010785
13.5833	0.345	1499.74	210.438	0.131872	138.5	133.531	89789.1	4.0383	0.00194825
18.7741	0.131556	1499.74	236.156	0.0761598	126.75	86.0625	89965.6	4.0383	0.00272503
15.3312	0.1066	1499.74	248.906	0.11836	125.625	61.875	89889.4	4.0383	0.00307334
20.6522	0.061	1499.74	275.219	0.059237	107.25	41.75	89532.8	4.0383	0.00375962
20.9697	0.184667	1499.74	249.219	0.136952	131.25	76.625	89821.9	4.72017	0.00347334
21.4128	0.126767	1499.74	291.5	0.15383	143.875	54.9375	89660	4.72017	0.00443644
16.2307	0.167597	1499.74	296.75	0.200853	191	65.9375	89545.3	4.72017	0.00537975
8.89425	0.129033	1499.74	292.625	0.152544	212.875	63.125	89666.2	4.72017	0.00500356
12.7747	0.123333	1499.74	324.781	0.193788	236.125	60.1562	89097.2	4.67464	0.00748856
16.0261	0.15725	1499.74	336.531	0.23171	215.5	51.8438	89356.6	4.67464	0.00758706
10.7895	0.152312	1499.74	331.656	0.235348	188	57.0312	89350	4.67464	0.00749963
10.7032	0.184945	1499.74	304	0.293405	209.625	74.1875	89387.5	4.67464	0.00539219
6.3913	0.192333	1499.74	354.531	0.224017	141.625	55.5	89190.6	4.64281	0.008399
10.9185	0.245472	1499.74	333.594	0.341354	63.75	62.5312	89043.1	4.64281	0.00740297
8.88406	0.209333	1499.74	364.219	0.31654	30.875	54.8125	88386.9	4.64281	0.0103418
	0.176667	1499.74	339.062	0.343525	60.375	74.25	88992.5	4.64281	0.00807087
11.3229	0.1345	1499.74	334.594	0.389964	149.75	75.6562	88945.3	4.4241	0.00791375
10.2139	0.145048	1499.74	347.688	0.197139	177.5	83.375	88640.3	4.4241	0.00651516
13.5359	0.227875	1499.74	374.25	0.325057	228.625	58.6875	88785	4.4241	0.0103852
8.12681	0.1332	1499.74	342.406	0.278975	170.75	75.75	88858.1	4.4241	0.00678603
41.9167	0.2387	1499.74	338.031	0.369619	187.75	52.3438	89298.1	4.79909	0.00697709
9.69565	0.127881	1499.74	313.75	0.220861	252.75	73.5625	89134.4	4.79909	0.00536869
14.1869	0.3635	1499.74	348.156	0.209536	235.125	57.1875	89391.6	4.79909	0.00839009
13.2464	0.133	1499.74	325.25	0.33816	253.25	50.4062	89655.9	4.4166	0.00739538
	0.132036	1499.74	298.25	0.310174	287.875	58.3438	89804.7	4.4166	0.00554525
	0.104056	1499.74	298.812	0.366925	280	52.1875	89440.3	4.4166	0.00585647
10.6858	0.205833	1499.74	273.469	0.297414	298.5	45.9062	90085.3	4.4166	0.00385656
12.3409	0.138396	1499.74	276.625	0.169283	332.75	50.1875	89855.6	5.01349	0.00363684
17.8889	0.13225	1499.74	288.562	0.168356	255.75	39.7812	89836.2	5.01349	0.00471313
6.30435	0.202133	1499.74	263.5	0.142646	138.875	36.6875	90150.6	5.01349	0.00360303
11.0227	0.212	1499.74	253.719	0.0984983	105.625	29.3125	90116.6	5.01349	0.00281666
18.9167	0.341	1499.74	241.094	0.0129816	58.625	48.5	89688.1	3.86981	0.00308553
10.8387		1499.74	256.812	0.0416901	1.625	23.4375	89505	3.86981	0.003195
10.5543		1499.74	239.156	0.0369296	0	27.375	90342.2	3.86981	0.00257291
7.49811		1499.74	238.594	0.00387429	0	33.4062	89970.3	3.86981	0.00280419
11.7905		1499.74	233.844	-0.00151289	0	43.0625	90191.2	5.33622	0.00239081
12.0417		1499.74	195.781	0.0100846	0	59.9688	90116.2	5.33622	0.00166734
7.79167		1499.74	214.125	0.0015476	0	58.1875	90215	5.33622	0.00218047
		1499.74	219.906	0.00566456	0	60.0625	90023.8	5.33622	0.00224891
10.7292		1499.74	216.156	0.000359102	0	59.875	90025	3.56342	0.00180756
23.25		1499.74	207.094	0.000480139	0	67.6875	90567.5	3.56342	0.00133075
15.7361		1499.74	188.156	0.00612923	0	82.9062	90185	3.56342	0.00129156
23.8125		1499.74	211.156	0.00988776	0	86.375	90482.5	3.56342	0.00174094
19.2292		1499.74	200.906	0.00749099	0.333333	101.125	90270.9	3.63827	0.00151756
		1499.74	207.906	0.00906127	0	111.188	90679.7	3.63827	0.00147172
69.2811		535.904	223.438	0.0835959	0.125	154.312	94924.7	3.82775	0.00206625
29.8606	0.186333	535.904	252.031	0.0689872	1.75	65.5312	95096.2	3.82775	0.00299569
31.1798	0.193722	535.904	264.812	0.0817855	0.75	44.125	94895	3.82775	0.0037655
26.8733	0.204	535.904	288.812	0.0454366	126.25	33.8125	94640.3	3.82775	0.00444131
29.8483	0.135625	535.904	269.688	0.0933588	46.625	58.6875	94850.3	4.41097	0.00405638
27.0775	0.111667	535.904	307.844	0.131651	24.125	41.7812	94524.1	4.41097	0.00524725
21.4706	0.105833	535.904	319.625	0.153668	98.375	55.7188	94349.4	4.41097	0.00590188
40.7597	0.0601	535.904	316.844	0.155289	122.875	50.4688	94503.4	4.41097	0.00556866
21.0014	0.1298	535.904	344.812	0.194887	148.5	51.375	93832.2	4.81426	0.00851916
23.516	0.17475	535.904	351.219	0.170202	113	43.6875	94125	4.81426	0.00836012
26.3563	0.105125	535.904	354.156	0.184249	127.625	45.9688	94169.4	4.81426	0.00850569
30.4903	0.137033	535.904	324.375	0.28112	150.875	62.5	94164.1	4.81426	0.00646509
20.2682	0.159875	535.904	369.688	0.203861	147.25	52.1875	93905	4.77292	0.00876325
18.7138	0.220967	535.904	351.875	0.219394	132.625	54.3125	93780.9	4.77292	0.00831844
20.7527	0.1925	535.904	382.375	0.198531	66.5	52.75	93057.2	4.77292	0.0112156
16.4999	0.139667	535.904	369.375	0.307135	108.625	62.0938	93676.2	4.77292	0.00927144
22.4314	0.158333	535.904	355.688	0.334059	228	62.4062	93616.6	4.61747	0.00925431
24.2444	0.133937	535.904	376.812	0.263499	256.625	72.25	93174.4	4.61747	0.00782825
33.6817	0.23475	535.904	402.031	0.198729	296.75	46.3438	93419.4	4.61747	0.0130503
24.4762	0.115533	535.904	370.312	0.208582	268.625	62.7812	93467.5	4.61747	0.00788569
27.0756	0.1684	535.904	356.875	0.287229	307.75	45.9062	94040	4.83877	0.00798797
30.023	0.143119	535.904	340.812	0.264994	349	59.75	93804.1	4.83877	0.00721794
23.7352	0.4477	535.904	363.938	0.207046	340.375	47.5	94197.8	4.83877	0.00949356
22.5881	0.165267	535.904	348.406	0.233468	358.75	42.1562	94500.3	4.44855	0.00843588
25.6462	0.191458	535.904	323.031	0.224426	378.875	44.5625	94653.4	4.44855	0.00664778
12.5272	0.155333	535.904	318.094	0.245323	379.125	41.3438	94300.9	4.44855	0.006975
10.6339	0.203267	535.904	294.594	0.213701	394.875	33.375	95093.1	4.44855	0.00488962
23.8946	0.1695	535.904	292.875	0.203235	404.25	40.6875	94708.8	4.32179	0.00482419
22.8709	0.232367	535.904	309.188	0.118113	367.375	30.8438	94788.4	4.32179	0.00551791
16.7953	0.234667	535.904	273.438	0.113359	325.375	27.5312	95208.8	4.32179	0.0041835
25.6901	0.1795	535.904	265.594	0.137709	271.75	24.125	95191.2	4.32179	0.00342372
32.7046	0.3605	535.904	252.906	0.0453983	226.625	38.1875	94758.1	3.22833	0.00347378
32.8232		535.904	270.031	-0.00114543	184.625	17.8438	94551.6	3.22833	0.00367984
33.215		535.904	249.562	0.0412031	163.5	21.3438	95459.1	3.22833	0.00274634
45.0851		535.904	249.031	0.026368	127.125	21.375	95001.6	3.22833	0.00288075
31.2131		535.904	244.094	-0.0035764	85.25	42.75	95387.5	3.52508	0.00256638
107.271		535.904	199.688	-0.00994009	44	68.75	95370	3.52508	0.00124322
144.396		535.904	220.625	0.00347002	6.375	63.625	95360.6	3.52508	0.00185987
91.0476		535.904	230.562	-0.00383531	0	65.0938	95147.8	3.52508	0.00206553
78.9185		535.904	220.125	-0.00348761	0	70.3438	95249.1	2.32006	0.00162828
89.9219		535.904	212.75	-0.0144195	0	75.8438	95891.2	2.32006	0.00130653
109.5		535.904	193.531	-0.00633872	0	92.4688	95503.8	2.32006	0.00106803
123.359		535.904	217.062	-0.000234034	0	99.6562	95749.4	2.32006	0.00145316
89.9219		535.904	205.812	0.00190671	0	113.906	95583.8	2.58359	0.00134859
100.264		535.904	217.156	-0.00407006	0	128.031	95921.9	2.58359	0.00144775
54.1137		535.904	223.438	0.0851494	0.125	154.312	94924.7	3.82775	0.00206625
27.5951	0.331	535.904	252.031	0.0682122	1.75	65.5312	95096.2	3.82775	0.00299569
25.565	0.182444	535.904	264.812	0.0896746	0.75	44.125	94895	3.82775	0.0037655
20.9127	0.184	535.904	288.812	0.0603135	126.25	33.8125	94640.3	3.82775	0.00444131
28.5345	0.1545	535.904	269.688	0.107937	46.625	58.6875	94850.3	4.41097	0.00405638
25.1052	0.1386	535.904	307.844	0.118587	24.125	41.7812	94524.1	4.41097	0.00524725
19.8107	0.119542	535.904	319.625	0.173634	98.375	55.7188	94349.4	4.41097	0.00590188
33.6476	0.1003	535.904	316.844	0.156933	122.875	50.4688	94503.4	4.41097	0.00556866
17.2684	0.1666	535.904	344.812	0.17032	148.5	51.375	93832.2	4.81426	0.00851916
22.4166	0.1335	535.904	351.219	0.184024	113	43.6875	94125	4.81426	0.00836012
24.1847	0.104666	535.904	354.156	0.303692	127.625	45.9688	94169.4	4.81426	0.00850569
27.5258	0.181278	535.904	324.375	0.265859	150.875	62.5	94164.1	4.81426	0.00646509
20.2193	0.17025	535.904	369.688	0.175825	147.25	52.1875	93905	4.77292	0.00876325
18.324	0.2376	535.904	351.875	0.199912	132.625	54.3125	93780.9	4.77292	0.00831844
17.1639	0.1857	535.904	382.375	0.254599	66.5	52.75	93057.2	4.77292	0.0112156
17.7329	0.139139	535.904	369.375	0.342001	108.625	62.0938	93676.2	4.77292	0.00927144
24.6138	0.145611	535.904	355.688	0.31572	228	62.4062	93616.6	4.61747	0.00925431
27.713	0.139458	535.904	376.812	0.276405	256.625	72.25	93174.4	4.61747	0.00782825
40.8929	0.170833	535.904	402.031	0.271847	296.75	46.3438	93419.4	4.61747	0.0130503
27.5145	0.1234	535.904	370.312	0.258635	268.625	62.7812	93467.5	4.61747	0.00788569
27.8492	0.165125	535.904	356.875	0.358259	307.75	45.9062	94040	4.83877	0.00798797
21.3537	0.144762	535.904	340.812	0.233628	349	59.75	93804.1	4.83877	0.00721794
19.9707	0.426533	535.904	363.938	0.223187	340.375	47.5	94197.8	4.83877	0.00949356
16.7548	0.139958	535.904	348.406	0.295671	358.75	42.1562	94500.3	4.44855	0.00843588
21.4762	0.174646	535.904	323.031	0.208703	378.875	44.5625	94653.4	4.44855	0.00664778
16.7076	0.154972	535.904	318.094	0.249051	379.125	41.3438	94300.9	4.44855	0.006975
17.073	0.2014	535.904	294.594	0.268698	394.875	33.375	95093.1	4.44855	0.00488962
27.2166	0.180479	535.904	292.875	0.178151	404.25	40.6875	94708.8	4.32179	0.00482419
37.2508	0.2192	535.904	309.188	0.104174	367.375	30.8438	94788.4	4.32179	0.00551791
32.1619	0.229333	535.904	273.438	0.143827	325.375	27.5312	95208.8	4.32179	0.0041835
51.0852	0.176222	535.904	265.594	0.111465	271.75	24.125	95191.2	4.32179	0.00342372
65.3902	0.408778	535.904	252.906	0.0177243	226.625	38.1875	94758.1	3.22833	0.00347378
60.7144		535.904	270.031	0.0247869	184.625	17.8438	94551.6	3.22833	0.00367984
57.0082		535.904	249.562	0.0549164	163.5	21.3438	95459.1	3.22833	0.00274634
72.4782		535.904	249.031	0.00154985	127.125	21.375	95001.6	3.22833	0.00288075
53.1108		535.904	244.094	-0.00569635	85.25	42.75	95387.5	3.52508	0.00256638
203.181		535.904	199.688	0.00245996	44	68.75	95370	3.52508	0.00124322
269.875		535.904	220.625	0.0072952	6.375	63.625	95360.6	3.52508	0.00185987
176.776		535.904	230.562	2.11416e-06	0	65.0938	95147.8	3.52508	0.00206553
144.472		535.904	220.125	-0.00285104	0	70.3438	95249.1	2.32006	0.00162828
190.863		535.904	212.75	0.00502742	0	75.8438	95891.2	2.32006	0.00130653
216.757		535.904	193.531	0.00570219	0	92.4688	95503.8	2.32006	0.00106803
248.177		535.904	217.062	0.00171629	0	99.6562	95749.4	2.32006	0.00145316
134.344		535.904	205.812	0.00607331	0	113.906	95583.8	2.58359	0.00134859
154.056		535.904	217.156	0.00302309	0	128.031	95921.9	2.58359	0.00144775
33.0362		401.888	235.031	0.0673643	0	73.9062	95300.9	2.27536	0.00282212
25.4686		401.888	248.938	0.087218	0	62.5312	95512.8	2.27536	0.0028975
24.0851	0.172	401.888	269.594	0.0610303	0	45.9688	95300	2.27536	0.00358909
17.4343	0.0495	401.888	257.438	0.0593354	8.875	53	95065.3	2.27536	0.00303519
23.3604	0.211	401.888	266.25	0.076561	25.25	59.5938	95244.7	2.65841	0.00356572
24.213	0.189233	401.888	306.125	0.100875	46.25	47.125	94957.8	2.65841	0.00482272
18.9074	0.145267	401.888	311.156	0.126224	101	53.8125	94805.3	2.65841	0.00446241
17.3948	0.133833	401.888	308.625	0.147139	138.375	60.9688	94965.6	2.65841	0.00399094
14.5888	0.1802	401.888	343.5	0.183734	121.125	59.5312	94326.9	2.8672	0.00628775
14.3772	0.139778	401.888	345.125	0.14332	18.375	54.0625	94577.5	2.8672	0.00623831
11.4884	0.161	401.888	335.469	0.203553	52.375	59.9688	94616.6	2.8672	0.0056885
13.5359	0.128444	401.888	322.375	0.286393	52.75	72.3125	94623.1	2.8672	0.00473859
14.8963	0.160875	401.888	360.25	0.174074	31.125	61.3438	94393.4	2.88244	0.00689475
13.4443	0.170033	401.888	340.75	0.282501	37.625	67.25	94222.2	2.88244	0.00590741
12.5322	0.2057	401.888	372.531	0.274853	38.375	65.875	93482.2	2.88244	0.00789516
15.084	0.113764	401.888	362.531	0.322574	35.375	71.4062	94063.1	2.88244	0.00672925
18.9438	0.14525	401.888	357.625	0.377762	148.625	67.75	94018.1	3.21771	0.00697087
18.1512	0.194073	401.888	386.406	0.29008	154	76.9375	93634.1	3.21771	0.00737
24.5208	0.2241	401.888	392.094	0.256922	219.25	64.6562	93862.5	3.21771	0.00829872
14.9092	0.130375	401.888	356.344	0.296279	252.25	70.7812	93925.3	3.21771	0.00553203
14.1533	0.189	401.888	353.562	0.320112	260.5	59.5938	94514.7	2.93599	0.00619003
16.7883	0.178476	401.888	344.906	0.22147	183.75	62.3125	94194.4	2.93599	0.00567359
12.2085	0.1546	401.888	339.031	0.201724	160.5	51.4375	94646.9	2.93599	0.00644753
12.6709	0.146467	401.888	326.438	0.252422	187.25	51.6562	94907.8	3.01332	0.00526431
13.6864	0.174417	401.888	320.75	0.25652	185	48.5	95035.6	3.01332	0.00504409
14.2251	0.160396	401.888	321.375	0.139648	173.75	38.9375	94729.4	3.01332	0.00500903
11.3103	0.12575	401.888	298.688	0.200436	180.25	34.75	95519.4	3.01332	0.00400528
23.1987	0.174867	401.888	301.594	0.179913	170.25	38.9375	95125.9	2.73089	0.00534606
21.6939	0.25825	401.888	303.625	0.0773112	133.125	32.5	95224.1	2.73089	0.00510669
15.2462	0.172778	401.888	254.219	0.11725	96.25	34.9375	95579.1	2.73089	0.00300094
29.679	0.29	401.888	281.438	0.0269087	41.375	31.3125	95559.1	2.73089	0.00382522
24.6174		401.888	241.969	0.12565	6.25	57.8125	95152.8	1.85536	0.00305766
27.0293	0.2615	401.888	268.281	0.00756253	0	29.8438	94960.6	1.85536	0.00341084
20.9973		401.888	249.438	0.00212421	0	31.6875	95816.6	1.85536	0.0027945
27.5296	0.1615	401.888	256.062	0.019893	0	21.2188	95394.4	1.85536	0.00343953
16.4716		401.888	232.594	-0.00404568	0	43.9375	95804.7	1.69568	0.00232372
39.1729		401.888	202.719	-0.00640524	0	55.9688	95734.4	1.69568	0.00152309
56.3802		401.888	220.906	-0.000919169	0	59.625	95763.4	1.69568	0.00213091
32.276		401.888	235.469	-0.00329749	0	59.5625	95528.1	1.69568	0.00247481
43.1069		401.888	228.031	0.00138405	0	62.5	95598.4	1.86816	0.00187488
37.4115		401.888	206.969	0.00400606	0	77.5625	96261.2	1.86816	0.00132594
66.4524		401.888	195.906	-0.00178091	0	88.9062	95873.8	1.86816	0.00108309
52.3646		401.888	210.719	0.000465986	0	100.281	96118.8	1.86816	0.0014735
36.4896		401.888	203.375	0.00585342	0	113.281	95964.4	2.05829	0.00140981
41.6771		401.888	209.312	0.00793183	0	130.469	96316.9	2.05829	0.00171091
43.9896	0.295	401.888	235.031	0.0884323	0	73.9062	95300.9	1.892	0.00282212
33.6437		401.888	248.938	0.0431573	0	62.5312	95512.8	1.892	0.0028975
33.9185	0.151667	401.888	269.594	0.0638982	0	45.9688	95300	1.892	0.00358909
21.0274	0.122167	401.888	257.438	0.0584425	16.5	53	95065.3	1.892	0.00303519
40.5182	0.24875	401.888	266.25	0.0936359	26.75	59.5938	95244.7	2.43633	0.00356572
26.6156	0.184306	401.888	306.125	0.10065	49.125	47.125	94957.8	2.43633	0.00482272
25.5644	0.118367	401.888	311.156	0.125324	102.25	53.8125	94805.3	2.43633	0.00446241
21.0686	0.119729	401.888	308.625	0.151146	139.125	60.9688	94965.6	2.43633	0.00399094
17.6744	0.176	401.888	343.5	0.190128	123.875	59.5312	94326.9	2.57305	0.00628775
18.8354	0.103833	401.888	345.125	0.128964	20	54.0625	94577.5	2.57305	0.00623831
14.8848	0.208	401.888	335.469	0.210063	48.875	59.9688	94616.6	2.57305	0.0056885
15.8678	0.123976	401.888	322.375	0.28496	51.5	72.3125	94623.1	2.57305	0.00473859
16.2735	0.14375	401.888	360.25	0.193512	33	61.3438	94393.4	2.59493	0.00689475
16.257	0.155056	401.888	340.75	0.265823	40	67.25	94222.2	2.59493	0.00590741
15.8564	0.2006	401.888	372.531	0.247224	37.875	65.875	93482.2	2.59493	0.00789516
15.9441	0.139012	401.888	362.531	0.309305	34.125	71.4062	94063.1	2.59493	0.00672925
20.9413	0.153976	401.888	357.625	0.322138	148.5	67.75	94018.1	2.93085	0.00697087
24.2065	0.179917	401.888	386.406	0.250101	155.375	76.9375	93634.1	2.93085	0.00737
21.1927	0.2399	401.888	392.094	0.244832	220.125	64.6562	93862.5	2.93085	0.00829872
22.1678	0.138194	401.888	356.344	0.28127	252.25	70.7812	93925.3	2.93085	0.00553203
20.0349	0.171333	401.888	353.562	0.267192	258.5	59.5938	94514.7	2.66966	0.00619003
22.3096	0.15775	401.888	344.906	0.219604	179	62.3125	94194.4	2.66966	0.00567359
17.5735	0.1796	401.888	339.031	0.185311	161.25	51.4375	94646.9	2.66966	0.00644753
18.7794	0.166583	401.888	326.438	0.252742	192.75	51.6562	94907.8	2.75083	0.00526431
19.1626	0.1815	401.888	320.75	0.200643	194.5	48.5	95035.6	2.75083	0.00504409
20.2163	0.158625	401.888	321.375	0.15062	184.75	38.9375	94729.4	2.75083	0.00500903
16.1278	0.148375	401.888	298.688	0.193306	190.5	34.75	95519.4	2.75083	0.00400528
34.1592	0.160333	401.888	301.594	0.18062	177.375	38.9375	95125.9	2.49056	0.00534606
32.0369	0.25275	401.888	303.625	0.0643565	127.625	32.5	95224.1	2.49056	0.00510669
22.4563	0.161167	401.888	254.219	0.11624	71.75	34.9375	95579.1	2.49056	0.00300094
40.5687	0.282	401.888	281.438	0.0454866	1.25	31.3125	95559.1	2.49056	0.00382522
33.0158		401.888	241.969	0.0871546	0	57.8125	95152.8	1.69518	0.00305766
37.2546	0.268	401.888	268.281	0.0434123	0	29.8438	94960.6	1.69518	0.00341084
28.6566		401.888	249.438	0.0266915	0	31.6875	95816.6	1.69518	0.0027945
36.5644	0.1605	401.888	256.062	-0.00556757	0	21.2188	95394.4	1.69518	0.00343953
22.6171		401.888	232.594	-6.33996e-05	0	43.9375	95804.7	1.55856	0.00232372
68.3667		401.888	202.719	-0.00329662	0	55.9688	95734.4	1.55856	0.00152309
103.37		401.888	220.906	0.00314657	0	59.625	95763.4	1.55856	0.00213091
57.5521		401.888	235.469	-0.00269569	0	59.5625	95528.1	1.55856	0.00247481
71.043		401.888	228.031	-0.00168082	0	62.5	95598.4	1.5776	0.00187488
57.9479		401.888	206.969	-0.000799676	0	77.5625	96261.2	1.5776	0.00132594
98.6012		401.888	195.906	-0.0037466	0	88.9062	95873.8	1.5776	0.00108309
79.974		401.888	210.719	0.000935649	0	100.281	96118.8	1.5776	0.0014735
29.4167		401.888	203.375	0.00668109	0	113.281	95964.4	1.7851	0.00140981
61.9583		401.888	209.312	0.0102586	0	130.469	96316.9	1.7851	0.00171091
75.1667	0.4326	1099.36	245.469	0.037705	0	30.875	89223.4	3.33487	0.00207628
174.061	0.812857	1099.36	244.594	0.0469772	0	35.6562	89394.1	3.33487	0.00166816
143.28	0.5275	1099.36	255.062	0.0628769	0.375	39.7812	89379.1	3.33487	0.00178147
276.14	0.203667	1099.36	288.875	0.0355803	26.25	33.9375	88551.2	3.33487	0.00228066
357.386	0.347	1099.36	274.031	0.071725	5.5	41.9688	89095	4.01677	0.00253228
318.185	0.4402	1099.36	302.531	0.0806424	12.375	37.8438	89173.4	4.01677	0.00277238
81.0924	0.0798334	1099.36	297.719	0.137947	40.625	44.7812	89168.1	4.01677	0.00288347
46.455	0.7483	1099.36	315.125	0.11107	68.25	40.5625	89038.8	4.01677	0.00354187
59.5564	0.782056	1099.36	325.875	0.156482	53.625	45.5312	88616.2	3.91865	0.00410931
138.812	0.1963	1099.36	342.062	0.150887	16.75	43.5625	88677.2	3.91865	0.00542959
12.8903	0.164	1099.36	325.75	0.129169	12.75	47.4062	88705.9	3.91865	0.00423919
60.9883	0.208286	1099.36	315.844	0.201025	61.5	53.7812	88869.1	3.91865	0.00370412
70.3495	0.4125	1099.36	347.375	0.166758	37.5	46	88622.5	3.95265	0.00609547
53.7075	0.19475	1099.36	330.938	0.141109	1.5	52.2812	88488.4	3.95265	0.00515431
39.3744	0.207	1099.36	353.469	0.181883	20.25	45.8438	88072.8	3.95265	0.00687844
50.6269	0.17331	1099.36	354.906	0.206383	30.625	54.875	88488.1	3.95265	0.00590781
79.0947	0.436188	1099.36	353.781	0.238938	102.25	51.6562	88388.1	3.92074	0.00577619
68.6552	0.30725	1099.36	371.031	0.198692	117.375	53.3438	88193.8	3.92074	0.00539281
92.5663	0.2175	1099.36	394.125	0.0961809	65	36.3125	88158.8	3.92074	0.00937059
100.374	0.26	1099.36	383.688	0.205564	22.5	34.875	88495.9	3.92074	0.0106555
36.8822	0.184528	1099.36	345.219	0.121582	45.5	43.5938	88688.4	3.74925	0.00715853
117.185	1.25503	1099.36	347.438	0.130232	38.375	44.4062	88617.2	3.74925	0.00543016
54.1196	0.25775	1099.36	347.625	0.146243	13.875	36.375	88620	3.74925	0.00475341
22.0718	0.192867	1099.36	334.094	0.228732	9.75	37.125	89080	3.62791	0.00549688
34.6192	0.214952	1099.36	325.562	0.187464	10.625	37	89390.9	3.62791	0.00545872
	0.157267	1099.36	310.812	0.172488	17.875	36.5625	88905	3.62791	0.00428053
	0.868042	1099.36	276.062	0.147709	21.875	37.1875	89430.6	3.62791	0.00254884
	0.372771	1099.36	290.125	0.171423	35.125	33.4062	89498.4	3.36732	0.00309831
57.6364	0.195143	1099.36	289.062	0.0916579	9.75	29.6562	89306.2	3.36732	0.00262037
61.993	0.08475	1099.36	279.5	0.145955	0	23.3125	89547.8	3.36732	0.00260566
57.2139	0.143933	1099.36	265.625	0.0822963	0	24.5312	89629.4	3.36732	0.00247087
63.7012	0.20975	1099.36	246.625	0.100043	0.625	21.25	89427.2	2.74015	0.00210406
67.7584	0.19225	1099.36	250.75	0.0971549	0	20.9688	89100.6	2.74015	0.00275513
117.833	0.227714	1099.36	243.719	0.0813307	0	18.75	89940.9	2.74015	0.00291594
122.756	0.168278	1099.36	241.625	0.0445453	0	18.125	89769.1	2.74015	0.00292322
84.6344	0.183125	1099.36	232.156	0.00889399	0	16.3125	89676.6	2.60998	0.00209306
51.337		1099.36	194.656	0.0212843	0	19.1562	90099.4	2.60998	0.00113753
85.4881		1099.36	209.156	0.0286224	0	22.7812	90231.9	2.60998	0.00168847
121.222		1099.36	226.281	0.060969	0	23.8438	89861.6	2.60998	0.00213841
93.9244		1099.36	228.781	0.0390148	0	35.9375	89745	2.74623	0.00216756
74.7292		1099.36	215.5	0.0540851	0	41	90068.1	2.74623	0.00193822
74.381		1099.36	204.156	0.0656182	0	45.3125	90008.1	2.74623	0.00145981
54.5312		1099.36	219.625	0.0427562	0	47.625	90376.2	2.74623	0.00188022
121.774		1099.36	223.719	0.0403891	0.333333	38.0625	89800.3	2.9287	0.00203306
112.797	0.321	1099.36	221.875	0.0815416	3.5	28.75	90227.8	2.9287	0.00176884
103.926	0.3314	1099.36	245.469	0.0577096	0	30.875	89223.4	3.33487	0.00207628
155.728	0.767762	1099.36	244.594	0.0638879	0	35.6562	89394.1	3.33487	0.00166816
106.42	0.474854	1099.36	255.062	0.0887471	0.375	39.7812	89379.1	3.33487	0.00178147
72.3943	0.214067	1099.36	288.875	0.043507	0	33.9375	88551.2	3.33487	0.00228066
173.2	0.3045	1099.36	274.031	0.0728944	5.375	41.9688	89095	4.01677	0.00253228
96.8098	0.4216	1099.36	302.531	0.076744	12.125	37.8438	89173.4	4.01677	0.00277238
40	0.0982	1099.36	297.719	0.135681	38.25	44.7812	89168.1	4.01677	0.00288347
128.202	0.360375	1099.36	315.125	0.117048	63.5	40.5625	89038.8	4.01677	0.00354187
143.306	0.744861	1099.36	325.875	0.152171	48.75	45.5312	88616.2	3.91865	0.00410931
135.494	0.201889	1099.36	342.062	0.139117	13.875	43.5625	88677.2	3.91865	0.00542959
21.4477	0.213	1099.36	325.75	0.175511	12	47.4062	88705.9	3.91865	0.00423919
57.8571	0.237452	1099.36	315.844	0.217021	59.375	53.7812	88869.1	3.91865	0.00370412
94.1964	0.274083	1099.36	347.375	0.133719	35.625	46	88622.5	3.95265	0.00609547
67.8304	0.2425	1099.36	330.938	0.153014	2.5	52.2812	88488.4	3.95265	0.00515431
72.3333	0.2595	1099.36	353.469	0.181408	19.5	45.8438	88072.8	3.95265	0.00687844
59.1063	0.222095	1099.36	354.906	0.221373	29.125	54.875	88488.1	3.95265	0.00590781
81.063	0.505238	1099.36	353.781	0.216745	101.125	51.6562	88388.1	3.92074	0.00577619
69.735	0.3535	1099.36	371.031	0.216783	116.25	53.3438	88193.8	3.92074	0.00539281
68.4167	0.225	1099.36	394.125	0.0737654	64.75	36.3125	88158.8	3.92074	0.00937059
	0.2955	1099.36	383.688	0.176492	20.25	34.875	88495.9	3.92074	0.0106555
57.077	0.237533	1099.36	345.219	0.194112	43.75	43.5938	88688.4	3.74925	0.00715853
164.771	1.28175	1099.36	347.438	0.122597	38	44.4062	88617.2	3.74925	0.00543016
61.4864	0.3355	1099.36	347.625	0.133045	13.75	36.375	88620	3.74925	0.00475341
34.1538	0.197708	1099.36	334.094	0.215697	9	37.125	89080	3.62791	0.00549688
46.979	0.186786	1099.36	325.562	0.1874	10.375	37	89390.9	3.62791	0.00545872
52.5833	0.225972	1099.36	310.812	0.173642	16.75	36.5625	88905	3.62791	0.00428053
31.4167	0.859812	1099.36	276.062	0.172562	19.875	37.1875	89430.6	3.62791	0.00254884
	0.364083	1099.36	290.125	0.155392	34.125	33.4062	89498.4	3.36732	0.00309831
94.0217	0.196119	1099.36	289.062	0.110327	10.25	29.6562	89306.2	3.36732	0.00262037
73.0965	0.149	1099.36	279.5	0.165258	0	23.3125	89547.8	3.36732	0.00260566
59.6663	0.140945	1099.36	265.625	0.0882333	0	24.5312	89629.4	3.36732	0.00247087
66.9325	0.197417	1099.36	246.625	0.101719	0	21.25	89427.2	2.74015	0.00210406
76.2358	0.1667	1099.36	250.75	0.126958	0	20.9688	89100.6	2.74015	0.00275513
84.8253	0.209119	1099.36	243.719	0.106694	0	18.75	89940.9	2.74015	0.00291594
101.568	0.137976	1099.36	241.625	0.0831502	0	18.125	89769.1	2.74015	0.00292322
78.0646	0.141	1099.36	232.156	0.00777875	0	16.3125	89676.6	2.60998	0.00209306
51.5798		1099.36	194.656	0.0216386	0	19.1562	90099.4	2.60998	0.00113753
92.5677		1099.36	209.156	0.0304919	0	22.7812	90231.9	2.60998	0.00168847
127.328		1099.36	226.281	0.0260858	0	23.8438	89861.6	2.60998	0.00213841
91.1415		1099.36	228.781	0.0271127	0	35.9375	89745	2.74623	0.00216756
80.0417		1099.36	215.5	0.0333199	0	41	90068.1	2.74623	0.00193822
70.5781		1099.36	204.156	0.0406861	0	45.3125	90008.1	2.74623	0.00145981
54.3646		1099.36	219.625	0.0495591	0	47.625	90376.2	2.74623	0.00188022
117.208		1099.36	223.719	0.0682415	0	38.0625	89800.3	2.9287	0.00203306
133.995	0.354667	1099.36	221.875	0.107538	1	28.75	90227.8	2.9287	0.00176884
81.1452	0.338167	1487.46	260.719	0.061001	0	51.6875	84964.4	4.36954	0.00311912
163.921	0.742646	1487.46	240.312	0.0768447	1.125	65.8125	85131.2	4.36954	0.00210197
59.0598	0.232972	1487.46	260.438	0.0956688	6	68.0938	85204.7	4.36954	0.00203112
54.523	0.225333	1487.46	287.156	0.042548	108.125	66.125	84388.1	4.36954	0.00264819
105.182	0.586583	1487.46	273.812	0.100637	19.125	75.1562	84891.6	5.11477	0.00276512
61.652	0.351667	1487.46	289.031	0.0656704	14.875	75.5938	85128.4	5.11477	0.00310819
47.0914	0.126533	1487.46	295.188	0.125857	52.25	68	85111.9	5.11477	0.00392659
71.5652	0.144	1487.46	294.406	0.104982	77.125	76.4062	85007.2	5.11477	0.00322016
69.2724	0.253833	1487.46	324.719	0.144424	23.5	79.5625	84623.1	4.96275	0.00477
47.4203	0.173733	1487.46	320.625	0.198773	43.5	84.25	84705.3	4.96275	0.00462797
20.072	0.214233	1487.46	306	0.19247	55.75	88.1562	84701.2	4.96275	0.00339559
26.249	0.201083	1487.46	312.656	0.226178	107.625	89.0938	84883.4	4.96275	0.00410528
35.9786	0.244521	1487.46	315.875	0.218229	128.125	92.5938	84676.9	5.06743	0.00413603
33.0483	0.19175	1487.46	320.156	0.182683	109.625	92.6562	84464.1	5.06743	0.00371712
17.8157	0.165208	1487.46	334.844	0.176255	93	79.8125	84111.6	5.06743	0.00561759
16.3806	0.151452	1487.46	342.469	0.208403	113.25	93.8438	84559.4	5.06743	0.00531225
79.3237	0.553429	1487.46	337.875	0.242377	150.75	96.3125	84425.6	5.02535	0.00456566
49.7501	0.3424	1487.46	366.969	0.140304	150.375	86.8438	84287.5	5.02535	0.00450634
58.8683	0.348	1487.46	377.219	0.130351	122.125	81.5938	84223.8	5.02535	0.00702228
48.8095	0.267834	1487.46	374.531	0.268779	15.375	54.8125	84575	5.02535	0.0108153
20.5214	0.173167	1487.46	328.969	0.269696	51.25	84.0625	84716.9	4.39256	0.00625716
100.676	1.08208	1487.46	336	0.245923	35.75	82.5625	84691.6	4.39256	0.00466794
16.3785	0.18175	1487.46	334.156	0.293811	28.5	75.25	84669.4	4.39256	0.0058455
20.2642	0.1581	1487.46	315.312	0.287381	29.25	76.25	85007.8	4.76933	0.00526444
15.4607	0.3801	1487.46	312.594	0.243382	37.5	67.75	85295.3	4.76933	0.00507122
40.3672	0.240278	1487.46	298.094	0.214188	55.5	68.3438	84856.2	4.76933	0.00369041
70.8822	0.3561	1487.46	289.312	0.193848	64	61.6875	85273.4	4.76933	0.00226819
78.4225	0.32531	1487.46	286.438	0.207318	75.75	61.1875	85386.9	3.69683	0.00334141
54.6325	0.249	1487.46	285.688	0.138885	66.125	56.625	85177.2	3.69683	0.00343694
71.5414	0.209625	1487.46	280.75	0.152718	50.625	40.4375	85368.8	3.69683	0.00356122
35.1835	0.130528	1487.46	263.812	0.0993208	0	48.0625	85374.1	3.69683	0.00289856
54.8344	0.199033	1487.46	250.125	0.139044	0	38.9375	85159.7	2.98354	0.00340169
48.951	0.1275	1487.46	252.688	0.157388	0	40.1562	84856.2	2.98354	0.00309791
47.0634	0.169433	1487.46	242.062	0.0944909	0	38.2188	85646.2	2.98354	0.00350519
60.9717	0.163667	1487.46	248.156	0.124416	0	33.5938	85482.5	2.98354	0.00340931
54.1034	0.153167	1487.46	219.531	0.0968708	0	33.4375	85352.5	2.72609	0.00204316
55.7513	0.230167	1487.46	188.25	0.0689122	0	35.375	85625.9	2.72609	0.00110384
95.2969	0.303583	1487.46	202.375	0.0858351	0	34.7812	85793.4	2.72609	0.00152697
88.6719	0.206917	1487.46	219.406	0.0898766	0	32.75	85479.4	2.72609	0.00187947
68.0827	0.17625	1487.46	216.688	0.0767535	0	35.4375	85322.8	2.50706	0.00214372
73.7865	0.0704583	1487.46	212.062	0.0185861	0	39.4688	85588.4	2.50706	0.00164397
76.8438		1487.46	220.969	0.0203761	0	53.4062	85486.9	2.50706	0.00170328
55.8611	0.159	1487.46	207.125	0.0707583	0	73.1875	85895.3	2.50706	0.00179256
169.12	0.1775	1487.46	226.188	0.0479097	0.666667	57.625	85357.8	2.87885	0.00230431
210.583	0.1915	1487.46	223.469	0.0972583	4.5	54.5938	85838.8	2.87885	0.00212356
142.624	0.277625	1550.94	268.281	0.0563339	0	55.4375	84434.7	4.16785	0.00342463
215.473	0.744167	1550.94	243.969	0.0503667	1	68.7812	84603.4	4.16785	0.00244503
137.555	0.261722	1550.94	263.125	0.0674215	2.5	71.8125	84672.8	4.16785	0.00229844
117.244	0.231	1550.94	288.625	0.0311133	5.5	68.875	83872.5	4.16785	0.00289459
190.058	0.4999	1550.94	280.312	0.0756635	14.5	77.4688	84345.3	4.71389	0.00277475
117.124	0.349	1550.94	293.5	0.0544343	13.25	79.5312	84595.6	4.71389	0.00331725
105.846	0.113433	1550.94	296.812	0.0886982	44	69.125	84583.8	4.71389	0.00401053
273.466	0.3805	1550.94	298.25	0.0738473	64.875	78.375	84481.9	4.71389	0.00334619
59.1142	0.512125	1550.94	328.125	0.0951732	20.625	80.5625	84097.5	4.60817	0.00521819
53.4574	0.124867	1550.94	321.719	0.105565	29.375	86.5312	84180.9	4.60817	0.00471819
50.2028	0.071611	1550.94	308	0.109226	38.125	91.8125	84171.2	4.60817	0.00352678
66.0426	0.252143	1550.94	312.75	0.149303	81.5	94.1562	84346.9	4.60817	0.00393881
78.6554	0.280357	1550.94	315.906	0.120875	100.25	96	84147.2	4.82227	0.00360763
62.225	0.276167	1550.94	320.969	0.115966	80.875	95.6875	83927.8	4.82227	0.00330897
42.4722	0.2237	1550.94	336.031	0.118246	60.75	82.5625	83586.2	4.82227	0.00516578
53.8944	0.180306	1550.94	347.781	0.124774	80.25	96.5938	84037.2	4.82227	0.00514647
124.865	0.807813	1550.94	339.031	0.114608	116.875	99.8125	83906.2	4.73702	0.00455219
92.2655	0.419167	1550.94	372.281	0.0805088	117.25	85.6875	83772.2	4.73702	0.0047255
122.09	0.442	1550.94	383.625	0.0811339	91.25	80.3438	83720.9	4.73702	0.00696056
74.654	0.24525	1550.94	378.281	0.119292	13.875	52.25	84081.6	4.73702	0.0106912
40.2948	0.200476	1550.94	331.469	0.133499	48.5	86.25	84201.2	4.04823	0.00608425
170.312	1.10433	1550.94	336.844	0.122226	30.875	85.5	84171.2	4.04823	0.00464113
27.5275	0.166583	1550.94	333	0.125737	19	79.2188	84151.6	4.04823	0.00604847
37.4274	0.204861	1550.94	316.906	0.134421	16.125	79.0938	84479.4	4.38598	0.0053755
54.9429	0.37731	1550.94	314.094	0.0955166	21.375	70.5312	84774.7	4.38598	0.00530803
82.6746	0.331714	1550.94	298.875	0.109437	35.125	72.1562	84339.7	4.38598	0.003853
123.335	0.3359	1550.94	291.344	0.109369	41.875	62.875	84750.6	4.38598	0.00247628
173.618	0.343604	1550.94	287.938	0.104049	51.25	64.375	84856.2	3.56778	0.00372966
109.705	0.277417	1550.94	287.531	0.0744625	19.625	60.3125	84659.1	3.56778	0.00382781
64.7159	0.2325	1550.94	283.75	0.0863161	8	42.3438	84848.8	3.56778	0.00390016
95.0235	0.195133	1550.94	264.844	0.0608201	0	50.9375	84872.8	3.56778	0.00304406
121.929	0.2437	1550.94	257.562	0.0873829	1.5	38.2188	84648.1	2.64659	0.00374431
122.324	0.1862	1550.94	255.438	0.0888927	0	41.7188	84346.2	2.64659	0.00333372
138.106	0.214389	1550.94	246.406	0.0492119	0	39.3438	85130.9	2.64659	0.00368803
176.501	0.204389	1550.94	255.375	0.0711019	0	34.4688	84975.6	2.64659	0.00357178
120.879	0.19325	1550.94	221.812	0.0489342	0	34.9375	84850.9	2.50183	0.00218622
98.4785	0.285875	1550.94	189.688	0.0472502	0	37.5	85140.3	2.50183	0.00121528
198.995	0.2716	1550.94	204.156	0.0648193	0	36.4062	85292.5	2.50183	0.00155619
195.104	0.189	1550.94	221.875	0.0607637	0	34.1875	84985.9	2.50183	0.00197247
135.163	0.182125	1550.94	222.594	0.0496629	0	36.3125	84835.3	2.37728	0.00229741
136.505	0.0807777	1550.94	221.438	0.0224425	0	41.6875	85073.4	2.37728	0.00166384
112.446		1550.94	233.406	0.00846013	0	73.0312	85012.2	2.37728	0.00177034
95.8646		1550.94	226.844	0.0609317	0	99.25	85405.9	2.37728	0.00191547
224.24	0.1695	1550.94	231.344	0.0366826	0.333333	51	84843.1	2.65619	0.00206375
236.771	0.27175	1550.94	226.594	0.073215	1	55.2812	85310.6	2.65619	0.00219391
106.269	0.225667	1346.53	269.344	0.0447676	0	62.3438	86634.4	4.08131	0.00339872
217.673	0.750929	1346.53	249.219	0.0456367	1.625	71.1562	86772.5	4.08131	0.00251622
105.942	0.213556	1346.53	268.594	0.0661017	1.75	74.25	86817.8	4.08131	0.00248428
123.381	0.2345	1346.53	289.875	0.0332026	1.75	70.8438	85998.4	4.08131	0.00308362
136.696	0.522	1346.53	285.344	0.0743701	19	78.3125	86482.8	4.53162	0.00288822
77.174	0.3885	1346.53	300.438	0.0484093	14.375	81.9688	86703.1	4.53162	0.00337278
66.4763	0.105667	1346.53	300.969	0.107956	53.5	75.8125	86694.1	4.53162	0.00403262
179.299	0.4308	1346.53	302.625	0.103667	77	81.2812	86595.9	4.53162	0.00347394
210.041	0.54575	1346.53	334.156	0.110122	30.75	82.4062	86146.6	4.45522	0.00530953
151.97	0.136867	1346.53	327.469	0.126528	30.875	89.3438	86246.6	4.45522	0.00466069
47.4339	0.128292	1346.53	313.938	0.142741	42.875	91.4375	86260.3	4.45522	0.003585
55.9077	0.205583	1346.53	318.938	0.169018	99.25	97.4688	86413.4	4.45522	0.00384481
71.6998	0.253643	1346.53	322.688	0.162645	124.625	98.1875	86187.2	4.70418	0.00334834
48.0846	0.221611	1346.53	328.906	0.116329	106.25	95.6875	85973.8	4.70418	0.00324894
39.0245	0.1991	1346.53	343.594	0.160842	82.25	84.8438	85625	4.70418	0.00494028
35.9773	0.167548	1346.53	355.562	0.158787	104	97.5312	86057.2	4.70418	0.00504809
110.637	0.748979	1346.53	348.469	0.150806	151.5	100.812	85919.1	4.55859	0.00473756
107.563	0.4045	1346.53	374.812	0.118918	154.75	90.8438	85765.9	4.55859	0.00482331
128.889	0.427	1346.53	386.781	0.0535426	128.625	83.2812	85731.9	4.55859	0.00685525
83.926	0.216833	1346.53	384.688	0.133077	14.125	57.8125	86118.8	4.55859	0.0103234
52.9466	0.144806	1346.53	342.094	0.167563	52.75	85.0312	86246.2	3.89364	0.00591903
214.257	1.23743	1346.53	341.719	0.145794	39.375	88	86206.6	3.89364	0.00474291
39.7724	0.171143	1346.53	336.875	0.162556	28	81.9062	86217.5	3.89364	0.00593056
48.3192	0.19425	1346.53	322.938	0.146786	25.125	79.6562	86555.9	4.1774	0.00533259
50.0417	0.355357	1346.53	319.656	0.145603	26.75	73.75	86857.5	4.1774	0.00547875
	0.263119	1346.53	302.969	0.146697	43.25	74.1875	86421.6	4.1774	0.00400656
	0.2756	1346.53	293.062	0.114819	55.75	65.9375	86868.1	4.1774	0.00273497
	0.298396	1346.53	295.594	0.123751	70.875	65.9688	86946.2	3.48708	0.00401328
	0.231271	1346.53	292.406	0.0938345	49.125	62.375	86758.4	3.48708	0.00395459
	0.1995	1346.53	288.094	0.0751752	38.5	45.875	87008.8	3.48708	0.00408156
152.91	0.135778	1346.53	269.344	0.0771154	2.875	52.6562	87010	3.48708	0.00300606
197.834	0.228	1346.53	258.312	0.100774	0.25	40.6875	86827.8	2.61593	0.00390841
215.272	0.140667	1346.53	259.094	0.097512	0	43.25	86502.5	2.61593	0.00341284
197.292	0.188467	1346.53	253.156	0.0540852	0.25	39.6875	87318.1	2.61593	0.00384056
241.154	0.192139	1346.53	260.281	0.0683118	0	36.0625	87151.6	2.61593	0.00374662
175.15	0.163	1346.53	226.5	0.0480811	0	36.5938	87083.1	2.48758	0.00231741
152.62	0.281625	1346.53	192	0.0357994	0	39.125	87421.9	2.48758	0.00130966
244.036	0.287	1346.53	207.844	0.0397403	0	37.7188	87552.5	2.48758	0.00163872
234.744	0.227333	1346.53	224.469	0.0530735	0	35.7812	87208.1	2.48758	0.00214041
187.168	0.225	1346.53	226.75	0.036546	0	37.4688	87062.8	2.38293	0.00237881
184.018	0.117458	1346.53	224.938	0.0328665	0	45.6875	87301.9	2.38293	0.00182403
171.964		1346.53	230.875	0.0179981	0	80.9688	87291.6	2.38293	0.00177863
140.807		1346.53	231.75	0.0422138	0	82.625	87671.9	2.38293	0.00220819
334.417	0.1	1346.53	233.062	0.0298591	0	55.875	87094.1	2.64114	0.00211847
326.869	0.1665	1346.53	230.188	0.0555109	0	57.5312	87524.7	2.64114	0.00221297
164.956	0.28975	1346.53	269.344	0.0916696	0	62.3438	86634.4	4.08131	0.00339872
299.097	0.862444	1346.53	249.219	0.109926	0.625	71.1562	86772.5	4.08131	0.00251622
185.112	0.263028	1346.53	268.594	0.142587	1.125	74.25	86817.8	4.08131	0.00248428
150.206	0.28275	1346.53	289.875	0.0457602	1.5	70.8438	85998.4	4.08131	0.00308362
194.376	0.579833	1346.53	285.344	0.133507	10	78.3125	86482.8	4.53162	0.00288822
109.567	0.445	1346.53	300.438	0.107329	13.25	81.9688	86703.1	4.53162	0.00337278
88.1816	0.144467	1346.53	300.969	0.169313	39.125	75.8125	86694.1	4.53162	0.00403262
91.8995	0.3782	1346.53	302.625	0.157102	55.625	81.2812	86595.9	4.53162	0.00347394
63.4042	0.5085	1346.53	334.156	0.201128	19.25	82.4062	86146.6	4.45522	0.00530953
257.298	0.194733	1346.53	327.469	0.241407	17.25	89.3438	86246.6	4.45522	0.00466069
139.083	0.189375	1346.53	313.938	0.246932	19.875	91.4375	86260.3	4.45522	0.003585
120.803	0.2175	1346.53	318.938	0.34485	50.25	97.4688	86413.4	4.45522	0.00384481
99.8692	0.285714	1346.53	322.688	0.372465	67.75	98.1875	86187.2	4.70418	0.00334834
59.0334	0.2183	1346.53	328.906	0.32523	46.25	95.6875	85973.8	4.70418	0.00324894
33.1839	0.179917	1346.53	343.594	0.43063	23.625	84.8438	85625	4.70418	0.00494028
32.1947	0.123771	1346.53	355.562	0.476633	39	97.5312	86057.2	4.70418	0.00504809
129.101	0.847063	1346.53	348.469	0.478737	63.625	100.812	85919.1	4.55859	0.00473756
114.325	0.3765	1346.53	374.812	0.223625	61	90.8438	85765.9	4.55859	0.00482331
115.96	0.226	1346.53	386.781	0.19672	32.625	83.2812	85731.9	4.55859	0.00685525
73.4418	0.177167	1346.53	384.688	0.562241	10.375	57.8125	86118.8	4.55859	0.0103234
43.9247	0.123286	1346.53	342.094	0.457168	33.125	85.0312	86246.2	3.89364	0.00591903
138.296	1.12819	1346.53	341.719	0.470064	15.125	88	86206.6	3.89364	0.00474291
17.5249	0.0893333	1346.53	336.875	0.551185	5.375	81.9062	86217.5	3.89364	0.00593056
42.9786	0.145867	1346.53	322.938	0.551575	4	79.6562	86555.9	4.1774	0.00533259
56.2961	0.336	1346.53	319.656	0.433204	2.125	73.75	86857.5	4.1774	0.00547875
95.3845	0.241024	1346.53	302.969	0.378986	10.5	74.1875	86421.6	4.1774	0.00400656
94.695	0.2566	1346.53	293.062	0.28384	15	65.9375	86868.1	4.1774	0.00273497
172.029	0.293854	1346.53	295.594	0.267316	21.375	65.9688	86946.2	3.48708	0.00401328
119.819	0.204375	1346.53	292.406	0.169212	1	62.375	86758.4	3.48708	0.00395459
113.106	0.298125	1346.53	288.094	0.166109	0	45.875	87008.8	3.48708	0.00408156
120.004	0.0948333	1346.53	269.344	0.133618	0	52.6562	87010	3.48708	0.00300606
142.936	0.195278	1346.53	258.312	0.2086	3.5	40.6875	86827.8	2.61593	0.00390841
158.651	0.1367	1346.53	259.094	0.212971	0	43.25	86502.5	2.61593	0.00341284
163.909	0.1566	1346.53	253.156	0.134774	0	39.6875	87318.1	2.61593	0.00384056
230.12	0.192667	1346.53	260.281	0.118031	0	36.0625	87151.6	2.61593	0.00374662
158.287	0.19275	1346.53	226.5	0.120594	0	36.5938	87083.1	2.48758	0.00231741
106.558	0.296	1346.53	192	0.0837425	0	39.125	87421.9	2.48758	0.00130966
215.917	0.3099	1346.53	207.844	0.154177	0	37.7188	87552.5	2.48758	0.00163872
219.047	0.21	1346.53	224.469	0.138096	0	35.7812	87208.1	2.48758	0.00214041
145.298	0.174667	1346.53	226.75	0.10458	0	37.4688	87062.8	2.38293	0.00237881
147.026	0.109292	1346.53	224.938	0.069593	0	45.6875	87301.9	2.38293	0.00182403
106.512		1346.53	230.875	0.0388947	0	80.9688	87291.6	2.38293	0.00177863
96.401	0.106	1346.53	231.75	0.10751	0	82.625	87671.9	2.38293	0.00220819
235.656	0.1235	1346.53	233.062	0.0880699	0.333333	55.875	87094.1	2.64114	0.00211847
222.917	0.175167	1346.53	230.188	0.151182	1.5	57.5312	87524.7	2.64114	0.00221297
128.531	0.534542	1399.26	255.469	0.0440657	28.125	63.1875	85815.9	4.2531	0.00291694
285.472	1.55967	1399.26	255.781	0.0396131	25	70.125	85980	4.2531	0.00243569
80	0.209889	1399.26	257.031	0.0810971	30.375	78.3438	86046.2	4.2531	0.00195466
95.8836	0.364875	1399.26	279.656	0.0847931	21.625	78	85194.1	4.2531	0.00312413
182.656	0.7775	1399.26	284.719	0.077495	27.875	76.1875	85702.2	4.81519	0.00268928
70.2533	0.226889	1399.26	284.375	0.131055	17.125	84.25	85968.1	4.81519	0.00215019
125.291	0.225417	1399.26	285.812	0.15868	41.125	95.8125	85897.5	4.81519	0.00262544
113.346	0.354375	1399.26	303.156	0.138931	67.75	86.2188	85761.2	4.81519	0.00273481
127.469	1.07088	1399.26	318.906	0.135015	82.75	96.9688	85391.2	4.80814	0.00327519
174.265	0.1585	1399.26	332.75	0.144834	92.125	86.3125	85533.4	4.80814	0.00401309
60.9826	0.29925	1399.26	322.531	0.160832	94.5	92.75	85542.5	4.80814	0.00400791
77.8621	0.202833	1399.26	328.125	0.190464	108.375	96.5312	85688.4	4.80814	0.00372159
64.5762	0.673119	1399.26	332.906	0.186118	70.125	98.8438	85497.2	4.64344	0.003943
122.929	0.3598	1399.26	331.344	0.145467	59.125	99.8125	85281.9	4.64344	0.00355106
127.246	0.1565	1399.26	349.406	0.145785	47.625	89.8125	84961.9	4.64344	0.00543478
103.667	0.15225	1399.26	348.688	0.187677	62.75	94.8125	85419.1	4.64344	0.00509459
175.101	0.753125	1399.26	358.094	0.162749	133.5	95.1562	85176.6	5.32777	0.00443244
98.7091	0.200967	1399.26	356.844	0.160082	153.875	99.625	84961.9	5.32777	0.00327297
198.498	1.4365	1399.26	380.875	0.130835	138.375	86.0312	84965.3	5.32777	0.00826291
127.543	0.571	1399.26	395.781	0.11592	134.5	61	85346.2	5.32777	0.012127
89.1848	0.081	1399.26	375.969	0.123566	140.625	73.3438	85530	4.61201	0.00876138
218.33	0.7618	1399.26	340.469	0.147794	126	88	85482.8	4.61201	0.00422437
104.208	0.623167	1399.26	357.438	0.115852	117	66.3125	85529.4	4.61201	0.00709828
46.131	0.156375	1399.26	338.125	0.147276	116.75	72.25	85851.9	4.38575	0.00635269
36.603	0.1488	1399.26	323.625	0.17655	120.375	73	86107.2	4.38575	0.005255
75.5361	0.3834	1399.26	329.375	0.121465	119	69.9062	85674.4	4.38575	0.00541659
99.4588	0.515458	1399.26	308.625	0.153266	136.5	68.375	86138.8	4.38575	0.00398609
78.9972	0.245271	1399.26	286.062	0.172625	165.125	70.7812	86233.4	3.7986	0.00321059
54.505	0.139714	1399.26	284.156	0.137013	171.625	66.1562	86001.2	3.7986	0.00340022
63.587	0.2723	1399.26	292.219	0.116432	175.5	48.4062	86204.4	3.7986	0.00439003
50.003	0.14869	1399.26	267.5	0.113578	174.375	53.1562	86234.4	3.7986	0.00323075
85.0209	0.2826	1399.26	261.781	0.111	177.375	49.4375	86047.2	3.46817	0.00354703
67.8098	0.143708	1399.26	251.969	0.142832	180.5	50.1562	85736.9	3.46817	0.00297538
49.7451	0.178695	1399.26	256.031	0.096826	179.25	43.625	86573.4	3.46817	0.00388169
55.4363	0.092	1399.26	243.188	0.117905	175.625	45.0625	86378.1	3.46817	0.00311109
52.0828	0.1485	1399.26	234.25	0.0791286	163	42.5625	86253.8	3.54656	0.00293178
41.9631	0.163	1399.26	196.594	0.0427382	150.625	43.0312	86586.2	3.54656	0.00148425
57.9531	0.238792	1399.26	211.281	0.0843402	110.5	41.625	86750.9	3.54656	0.001316
78.2708	0.1847	1399.26	221.406	0.0785901	84.2857	38.4062	86389.4	3.54656	0.00178153
59.5181	0.189071	1399.26	216.969	0.0955628	74.8571	44.9688	86243.4	3.46148	0.0021435
85.9531	0.205583	1399.26	216.312	0.0600606	34.75	46.3125	86461.6	3.46148	0.00186816
95.6964	0.432167	1399.26	208.094	0.0526758	8.125	81.3438	86395.3	3.46148	0.00160594
57.744	0.263667	1399.26	217.125	0.0723078	0.25	54.5625	86843.1	3.46148	0.00198825
232.893	0.162	1399.26	231.875	0.0323645	0.666667	59.0312	86257.5	3.46421	0.00206047
142.025	0.6095	1399.26	234.938	0.0588416	6	61.1562	86756.9	3.46421	0.00176334
114.136	0.403792	1399.26	255.469	0.0423079	1.125	63.1875	85815.9	4.2531	0.00291694
243.78	1.42367	1399.26	255.781	0.0432489	6.75	70.125	85980	4.2531	0.00243569
68.5005	0.207167	1399.26	257.031	0.0819494	12.375	78.3438	86046.2	4.2531	0.00195466
91.7146	0.303	1399.26	279.656	0.0869386	4.625	78	85194.1	4.2531	0.00312413
221.622	0.77525	1399.26	284.719	0.0773315	12.125	76.1875	85702.2	4.81519	0.00268928
61.0035	0.243472	1399.26	284.375	0.141224	8.5	84.25	85968.1	4.81519	0.00215019
46.4091	0.224905	1399.26	285.812	0.1712	35.125	95.8125	85897.5	4.81519	0.00262544
105.998	0.349125	1399.26	303.156	0.147612	62.5	86.2188	85761.2	4.81519	0.00273481
96.3356	0.8591	1399.26	318.906	0.153284	77.375	96.9688	85391.2	4.80814	0.00327519
150.337	0.17575	1399.26	332.75	0.136956	86.625	86.3125	85533.4	4.80814	0.00401309
69.7296	0.2495	1399.26	322.531	0.172702	99.5	92.75	85542.5	4.80814	0.00400791
62.3262	0.356867	1399.26	328.125	0.175708	107.375	96.5312	85688.4	4.80814	0.00372159
151.973	0.818778	1399.26	332.906	0.192005	64.125	98.8438	85497.2	4.64344	0.003943
85.1403	0.4001	1399.26	331.344	0.145674	51.75	99.8125	85281.9	4.64344	0.00355106
68.9547	0.1741	1399.26	349.406	0.176202	38.625	89.8125	84961.9	4.64344	0.00543478
26.7714	0.1654	1399.26	348.688	0.158774	53.75	94.8125	85419.1	4.64344	0.00509459
147.41	0.5496	1399.26	358.094	0.190125	125.875	95.1562	85176.6	5.32777	0.00443244
47.4718	0.2136	1399.26	356.844	0.156287	146.375	99.625	84961.9	5.32777	0.00327297
	1.10337	1399.26	380.875	0.118498	132.375	86.0312	84965.3	5.32777	0.00826291
116.266	0.53275	1399.26	395.781	0.131168	128.5	61	85346.2	5.32777	0.012127
94.2729	0.22475	1399.26	375.969	0.118377	134.625	73.3438	85530	4.61201	0.00876138
79.5694	0.7519	1399.26	340.469	0.160813	117.5	88	85482.8	4.61201	0.00422437
92.9645	0.704333	1399.26	357.438	0.134897	108.5	66.3125	85529.4	4.61201	0.00709828
50.9414	0.1735	1399.26	338.125	0.164505	108.75	72.25	85851.9	4.38575	0.00635269
32.6036	0.17125	1399.26	323.625	0.205354	112.375	73	86107.2	4.38575	0.005255
74.4595	0.351444	1399.26	329.375	0.137091	110.875	69.9062	85674.4	4.38575	0.00541659
147.72	0.372452	1399.26	308.625	0.16215	128.5	68.375	86138.8	4.38575	0.00398609
86.5122	0.268188	1399.26	286.062	0.169691	157.125	70.7812	86233.4	3.7986	0.00321059
63.2604	0.165143	1399.26	284.156	0.149839	162.75	66.1562	86001.2	3.7986	0.00340022
73.6848	0.2907	1399.26	292.219	0.135762	166.5	48.4062	86204.4	3.7986	0.00439003
73.4852	0.157286	1399.26	267.5	0.10535	165.375	53.1562	86234.4	3.7986	0.00323075
116.874	0.2919	1399.26	261.781	0.115166	168.375	49.4375	86047.2	3.46817	0.00354703
105.013	0.169333	1399.26	251.969	0.131218	171.5	50.1562	85736.9	3.46817	0.00297538
84.913	0.1653	1399.26	256.031	0.103738	170.25	43.625	86573.4	3.46817	0.00388169
98.6322	0.134857	1399.26	243.188	0.111591	166.625	45.0625	86378.1	3.46817	0.00311109
72.9332	0.155389	1399.26	234.25	0.0543685	154	42.5625	86253.8	3.54656	0.00293178
45.9613	0.177	1399.26	196.594	0.0516379	141.625	43.0312	86586.2	3.54656	0.00148425
68.2333	0.246708	1399.26	211.281	0.0816866	102.5	41.625	86750.9	3.54656	0.001316
99.6823	0.1822	1399.26	221.406	0.0778433	78.2857	38.4062	86389.4	3.54656	0.00178153
87.9807	0.16625	1399.26	216.969	0.0829232	68.8571	44.9688	86243.4	3.46148	0.0021435
106.333	0.200067	1399.26	216.312	0.0536566	29.375	46.3125	86461.6	3.46148	0.00186816
136.745	0.441333	1399.26	208.094	0.0507306	3.25	81.3438	86395.3	3.46148	0.00160594
93.9271	0.260429	1399.26	217.125	0.0636029	0	54.5625	86843.1	3.46148	0.00198825
343.946	0.17675	1399.26	231.875	0.0329408	0.666667	59.0312	86257.5	3.46421	0.00206047
168.99	0.4549	1399.26	234.938	0.0621789	6	61.1562	86756.9	3.46421	0.00176334
45.66	0.295	539.488	251.969	0.109769	0	40.1875	95752.8	4.89382	0.00264025
26.6513	0.21925	539.488	244.719	0.0609513	0.875	45.875	96286.6	4.89382	0.00251641
31.2663	0.201778	539.488	261.562	0.0887371	0	49.125	96005	4.89382	0.00308947
19.2091	0.178	539.488	264.094	0.0591269	3.75	61.7188	95800.3	4.89382	0.00282744
30.3804	0.2213	539.488	265.062	0.143231	60	74.25	95883.1	4.4149	0.00354631
40.2269	0.202875	539.488	303.031	0.0858743	10	52.2812	95647.2	4.4149	0.00435522
25.3184	0.145958	539.488	311.688	0.158087	37.875	56.375	95490.3	4.4149	0.00458544
33.7143	0.148778	539.488	312.75	0.245251	27.125	56.0625	95713.1	4.4149	0.00504106
34.7701	0.09775	539.488	332	0.150122	3.5	57.6875	95104.4	3.99283	0.00616588
24.2366	0.107533	539.488	340.844	0.300278	5.25	60.4062	95345.6	3.99283	0.00670462
20.8208	0.241125	539.488	329.156	0.294592	32.75	62.4375	95367.2	3.99283	0.00541884
26.0903	0.0719643	539.488	316.719	0.349582	44.375	74.0625	95299.1	3.99283	0.00493225
27.82	0.1051	539.488	350.844	0.240819	22.625	61.8438	95197.5	3.96548	0.00657941
23.6293	0.122583	539.488	326.969	0.360471	27.25	75.2188	94945.9	3.96548	0.00527156
19.7446	0.150875	539.488	364.188	0.267055	16.5	61.2812	94329.1	3.96548	0.00808291
20.7191	0.124813	539.488	342.875	0.291911	21.25	76.4688	94876.2	3.96548	0.00646091
27.2745	0.0977222	539.488	343.156	0.343714	116.375	74	94680.3	3.8605	0.00594756
56.5397	0.202833	539.488	377	0.24922	112.25	72.3125	94303.4	3.8605	0.00684488
36.8279	0.195033	539.488	388.031	0.277588	148.375	63.6562	94455.9	3.8605	0.009829
26.7851	0.191333	539.488	370.719	0.271603	166.875	65.0312	94554.7	3.8605	0.00775038
32.8822	0.176222	539.488	340.156	0.284829	176.875	61.625	95202.5	3.95971	0.00582306
30.5181	0.162345	539.488	336.031	0.160449	51	63.4688	94858.4	3.95971	0.00463822
27.2566	0.222333	539.488	339.188	0.237406	34.5	47.9688	95246.9	3.95971	0.00669644
40.7609	0.142361	539.488	314.938	0.28498	74.625	51.0938	95632.5	4.35539	0.00518709
40.5244	0.16881	539.488	304.125	0.221648	64.25	53.9062	95693.4	4.35539	0.00449062
31.1329	0.2413	539.488	308.531	0.203852	33.5	44.4062	95551.2	4.35539	0.00501159
31.8669	0.14125	539.488	280.969	0.229512	56.75	48.2188	96053.1	4.35539	0.00364922
47.8643	0.135714	539.488	309.656	0.130656	49.25	41.125	95652.8	5.18386	0.00463506
34.5185	0.221167	539.488	307.875	0.0885755	7	28.5625	95849.4	5.18386	0.00495897
35.2939	0.112708	539.488	257.719	0.14558	0.125	36.5625	96256.6	5.18386	0.00279253
57.3695	0.19775	539.488	286.844	0.077727	0	36.6562	96033.8	5.18386	0.00408266
52.5418	0.152667	539.488	249.406	0.134126	0	28.5938	95810	4.56788	0.00273006
30.5702	0.15725	539.488	268.875	0.0607292	0	33.8125	95769.4	4.56788	0.00347687
45.5015	0.17575	539.488	244.156	0.0911106	0	42.125	96483.1	4.56788	0.00266972
56.1094	0.106133	539.488	255.906	0.144682	0	21.8125	96065.3	4.56788	0.00288069
24.3801	0.143	539.488	233.531	0.0236398	0	32.875	96550.9	5.6009	0.00212975
64.3363		539.488	217.719	0.0169926	0	61.9062	96262.5	5.6009	0.00189759
62.2153		539.488	228.719	0.0106625	0	52.6875	96536.6	5.6009	0.00218769
67.3854		539.488	243.094	0.00917969	0	45.4375	96097.8	5.6009	0.00278794
108.039		539.488	232.562	0.00935753	0	61.2188	96026.2	6.49003	0.00256047
61.8512		539.488	212.562	0.13638	0	80.7812	96766.9	6.49003	0.00200128
59.4844		539.488	225.938	0.000563995	0	90.5938	96064.7	6.49003	0.00236725
70.9219		539.488	219.094	0.026795	0	106.469	96561.2	6.49003	0.0023555
51.825		539.488	212.625	0.0409946	0	120.781	96470.6	6.03497	0.00192794
65.5885		539.488	218.594	0.166089	0.5	139.656	96956.6	6.03497	0.00244484
51.2476	0.245	539.488	251.969	0.156059	0.25	40.1875	95752.8	4.47109	0.00264025
36.3674	0.1985	539.488	244.719	0.11905	0.875	45.875	96286.6	4.47109	0.00251641
28.0757	0.120611	539.488	261.562	0.153183	0	49.125	96005	4.47109	0.00308947
18.119	0.13	539.488	264.094	0.103771	4	61.7188	95800.3	4.47109	0.00282744
33.9832	0.154167	539.488	265.062	0.198071	22	74.25	95883.1	4.01995	0.00354631
38.197	0.2551	539.488	303.031	0.0881076	24.125	52.2812	95647.2	4.01995	0.00435522
27.5302	0.130389	539.488	311.688	0.242602	43.125	56.375	95490.3	4.01995	0.00458544
24.2748	0.157667	539.488	312.75	0.321254	36.375	56.0625	95713.1	4.01995	0.00504106
20.5878	0.1225	539.488	332	0.173517	7.5	57.6875	95104.4	3.82154	0.00616588
19.3156	0.135	539.488	340.844	0.48931	5.5	60.4062	95345.6	3.82154	0.00670462
18.9445	0.2144	539.488	329.156	0.477779	32.5	62.4375	95367.2	3.82154	0.00541884
16.3188	0.0832976	539.488	316.719	0.540724	40.625	74.0625	95299.1	3.82154	0.00493225
16.3289	0.1156	539.488	350.844	0.285725	17.375	61.8438	95197.5	3.75747	0.00657941
14.9959	0.105653	539.488	326.969	0.544741	23.5	75.2188	94945.9	3.75747	0.00527156
16.4545	0.138708	539.488	364.188	0.336742	16.875	61.2812	94329.1	3.75747	0.00808291
16.6906	0.137667	539.488	342.875	0.457971	25.75	76.4688	94876.2	3.75747	0.00646091
22.4829	0.1055	539.488	343.156	0.5444	122.25	74	94680.3	3.6027	0.00594756
32.9962	0.215	539.488	377	0.380892	116.125	72.3125	94303.4	3.6027	0.00684488
26.6951	0.184583	539.488	388.031	0.360604	153	63.6562	94455.9	3.6027	0.009829
26.1762	0.1888	539.488	370.719	0.404363	173	65.0312	94554.7	3.6027	0.00775038
21.4066	0.184733	539.488	340.156	0.500372	176.75	61.625	95202.5	3.64242	0.00582306
25.3474	0.16231	539.488	336.031	0.370696	38.625	63.4688	94858.4	3.64242	0.00463822
18.9312	0.19275	539.488	339.188	0.376581	18.625	47.9688	95246.9	3.64242	0.00669644
31.75	0.139528	539.488	314.938	0.387343	53.25	51.0938	95632.5	4.09218	0.00518709
26.6301	0.129305	539.488	304.125	0.377193	43	53.9062	95693.4	4.09218	0.00449062
	0.212357	539.488	308.531	0.407223	19.625	44.4062	95551.2	4.09218	0.00501159
40.8067	0.175583	539.488	280.969	0.335436	48.625	48.2188	96053.1	4.09218	0.00364922
	0.135071	539.488	309.656	0.152515	38	41.125	95652.8	4.58234	0.00463506
23.0184	0.1955	539.488	307.875	0.182631	2.125	28.5625	95849.4	4.58234	0.00495897
25.2129	0.1186	539.488	257.719	0.190982	0.375	36.5625	96256.6	4.58234	0.00279253
42.3105	0.237	539.488	286.844	0.143139	0	36.6562	96033.8	4.58234	0.00408266
59.0691	0.150967	539.488	249.406	0.122027	0	28.5938	95810	3.969	0.00273006
33.6116	0.14525	539.488	268.875	0.101898	0	33.8125	95769.4	3.969	0.00347687
57.3326	0.166194	539.488	244.156	0.153771	0	42.125	96483.1	3.969	0.00266972
73.1617	0.0963668	539.488	255.906	0.0893519	0	21.8125	96065.3	3.969	0.00288069
29.8236	0.189	539.488	233.531	0.0635103	0	32.875	96550.9	4.66202	0.00212975
61.7385		539.488	217.719	0.0456093	0	61.9062	96262.5	4.66202	0.00189759
62.375		539.488	228.719	0.0627803	0	52.6875	96536.6	4.66202	0.00218769
69.5833		539.488	243.094	0.0175402	0	45.4375	96097.8	4.66202	0.00278794
115.91		539.488	232.562	0.0346487	0	61.2188	96026.2	5.34989	0.00256047
68.4427		539.488	212.562	0.0422309	0	80.7812	96766.9	5.34989	0.00200128
74.0312		539.488	225.938	0.0185332	0	90.5938	96064.7	5.34989	0.00236725
84.7083		539.488	219.094	0.0392453	0	106.469	96561.2	5.34989	0.0023555
81.6845		539.488	212.625	0.0456912	0	120.781	96470.6	5.05106	0.00192794
82.6667		539.488	218.594	0.109368	1	139.656	96956.6	5.05106	0.00244484
40.6513	0.27725	539.488	251.969	0.156596	0	40.1875	95752.8	4.79968	0.00264025
25.9734	0.254875	539.488	244.719	0.0784838	2.125	45.875	96286.6	4.79968	0.00251641
26.006	0.167208	539.488	261.562	0.12102	0	49.125	96005	4.79968	0.00308947
12.7738	0.121	539.488	264.094	0.0794474	3.875	61.7188	95800.3	4.79968	0.00282744
	0.23025	539.488	265.062	0.157858	18.875	74.25	95883.1	4.2748	0.00354631
	0.2415	539.488	303.031	0.103028	10	52.2812	95647.2	4.2748	0.00435522
14.2308	0.105667	539.488	311.688	0.206488	35.375	56.375	95490.3	4.2748	0.00458544
19.1739	0.119166	539.488	312.75	0.364548	25.5	56.0625	95713.1	4.2748	0.00504106
	0.127333	539.488	332	0.173587	2.5	57.6875	95104.4	3.84488	0.00616588
	0.109833	539.488	340.844	0.368312	4.25	60.4062	95345.6	3.84488	0.00670462
	0.174125	539.488	329.156	0.303897	29	62.4375	95367.2	3.84488	0.00541884
	0.0645476	539.488	316.719	0.399426	54.625	74.0625	95299.1	3.84488	0.00493225
	0.1034	539.488	350.844	0.20729	37.125	61.8438	95197.5	3.83511	0.00657941
	0.122667	539.488	326.969	0.351877	46.25	75.2188	94945.9	3.83511	0.00527156
	0.143542	539.488	364.188	0.348177	17.5	61.2812	94329.1	3.83511	0.00808291
	0.126021	539.488	342.875	0.330673	28.5	76.4688	94876.2	3.83511	0.00646091
24.2112	0.122857	539.488	343.156	0.383625	158	74	94680.3	3.77365	0.00594756
38.1573	0.196833	539.488	377	0.323708	159.25	72.3125	94303.4	3.77365	0.00684488
34.5616	0.211533	539.488	388.031	0.303801	200.125	63.6562	94455.9	3.77365	0.009829
32.8626	0.157583	539.488	370.719	0.302261	226.375	65.0312	94554.7	3.77365	0.00775038
24.7765	0.153306	539.488	340.156	0.346261	249.5	61.625	95202.5	3.87014	0.00582306
33.9471	0.142929	539.488	336.031	0.19835	124.75	63.4688	94858.4	3.87014	0.00463822
27.4301	0.180333	539.488	339.188	0.256831	108.25	47.9688	95246.9	3.87014	0.00669644
26.4514	0.118014	539.488	314.938	0.317547	149.625	51.0938	95632.5	4.23615	0.00518709
27.2087	0.129944	539.488	304.125	0.236245	140.375	53.9062	95693.4	4.23615	0.00449062
25.676	0.232417	539.488	308.531	0.258475	112.125	44.4062	95551.2	4.23615	0.00501159
28.7116	0.114833	539.488	280.969	0.231137	137.75	48.2188	96053.1	4.23615	0.00364922
39.6127	0.13275	539.488	309.656	0.137667	129.125	41.125	95652.8	5.0808	0.00463506
40.9166	0.215333	539.488	307.875	0.0880996	85.875	28.5625	95849.4	5.0808	0.00495897
42.0586	0.100167	539.488	257.719	0.19395	60.625	36.5625	96256.6	5.0808	0.00279253
89.4219	0.18825	539.488	286.844	0.073673	21.125	36.6562	96033.8	5.0808	0.00408266
72	0.157	539.488	249.406	0.128445	2.25	28.5938	95810	4.42665	0.00273006
36.5605	0.1355	539.488	268.875	0.0610363	0	33.8125	95769.4	4.42665	0.00347687
77.914	0.173917	539.488	244.156	0.108382	0	42.125	96483.1	4.42665	0.00266972
97.7228	0.10375	539.488	255.906	0.0893431	0	21.8125	96065.3	4.42665	0.00288069
43.2043		539.488	233.531	0.0167962	0	32.875	96550.9	5.40214	0.00212975
95.6615		539.488	217.719	0.0134196	0	61.9062	96262.5	5.40214	0.00189759
111.44		539.488	228.719	0.0168534	0	52.6875	96536.6	5.40214	0.00218769
98.7135		539.488	243.094	0.00428606	0	45.4375	96097.8	5.40214	0.00278794
183.484		539.488	232.562	0.00929913	0	61.2188	96026.2	6.31284	0.00256047
105.724		539.488	212.562	0.00877891	0	80.7812	96766.9	6.31284	0.00200128
129.883		539.488	225.938	0.0077311	0	90.5938	96064.7	6.31284	0.00236725
81.4167		539.488	219.094	0.00719717	0	106.469	96561.2	6.31284	0.0023555
69.9167		539.488	212.625	0.0157923	0	120.781	96470.6	5.85009	0.00192794
102.422		539.488	218.594	0.0550385	1	139.656	96956.6	5.85009	0.00244484
18.5458		438.624	220.938	0.0224448	0	85.125	96965.9	5.13587	0.00238813
21.6175		438.624	234.188	0.0155846	0	52.6562	97353.4	5.13587	0.00273072
22.0374		438.624	252.25	0.0382241	0	47.4375	97055.9	5.13587	0.00358687
17.2663		438.624	243.844	0.0729958	6.625	74.1562	96989.1	5.13587	0.00310266
26.7927	0.1775	438.624	254.312	0.157802	27.375	69.875	97010.3	5.28003	0.00341169
26.4504	0.1185	438.624	303.719	0.0767054	62.5	49.7188	96629.4	5.28003	0.00510159
24.2974	0.152333	438.624	308.062	0.178773	46.75	68.875	96405	5.28003	0.00611062
15.695	0.125429	438.624	305.094	0.292877	134.25	63.5625	96720.9	5.28003	0.00530709
14.5009	0.168083	438.624	325	0.213875	101.875	66.2188	96008.8	4.88684	0.00650462
18.3847	0.196937	438.624	335.438	0.217351	22.875	61.375	96258.1	4.88684	0.0076055
17.8946	0.192625	438.624	324.062	0.229166	39.75	64.9062	96325.9	4.88684	0.00724481
15.033	0.127417	438.624	313.219	0.356458	29.5	78.6875	96315.3	4.88684	0.00566078
15.6145	0.1761	438.624	352.156	0.310933	20.75	72.6875	96015	4.54119	0.00833406
17.511	0.181095	438.624	341.719	0.342992	35.625	73	95904.4	4.54119	0.00736472
20.1343	0.194867	438.624	373.281	0.335312	50.75	71.3438	95116.2	4.54119	0.00959113
18.2065	0.1808	438.624	354.312	0.32966	38.75	69.1562	95701.6	4.54119	0.00762419
16.1821	0.160107	438.624	349.156	0.46017	93.5	75.8125	95651.6	5.29511	0.00736844
20.7824	0.213667	438.624	384.219	0.340419	106.875	78.75	95283.8	5.29511	0.00864297
18.933	0.183143	438.624	367.688	0.429169	197	72.875	95421.9	5.29511	0.00758484
18.0265	0.118381	438.624	356.656	0.30785	230.875	73.5312	95534.1	5.29511	0.00605197
15.596	0.210733	438.624	341.312	0.279276	260.625	64	96127.8	4.67043	0.00589844
20.5534	0.0818666	438.624	340.156	0.235605	246.625	62.75	95840.3	4.67043	0.00564572
15.9502	0.127125	438.624	325.719	0.278906	191.5	58.3438	96301.2	4.67043	0.00596769
15.07	0.114306	438.624	325.094	0.264246	177	50.2188	96659.4	4.89489	0.00631734
15.2695	0.1325	438.624	311.562	0.180033	79.5	46.375	96717.5	4.89489	0.00550128
16.1715	0.0815417	438.624	311.406	0.267513	3.125	39.0938	96428.4	4.89489	0.00592262
18.1294	0.10175	438.624	272.656	0.186802	10.5	46.5625	97201.6	4.89489	0.0036895
25.7946	0.148319	438.624	299.625	0.114789	3.75	38.9688	96644.4	6.32364	0.00432353
22.6549	0.05675	438.624	302.281	0.15293	0.125	21.6875	97014.7	6.32364	0.00480178
22.1245	0.110167	438.624	258.094	0.109254	0	32.6875	97365.9	6.32364	0.00329366
24.4268	0.111	438.624	272.969	0.133292	0	31.3438	97209.1	6.32364	0.00350863
25.5541	0.1705	438.624	248.219	0.0393586	0	31.3125	96820	4.32222	0.00304412
24.4534	0.109	438.624	280.906	0.0133608	0	15.2812	96703.8	4.32222	0.00372284
26.9822		438.624	245.781	0.0251792	0	53.5938	97561.6	4.32222	0.00274463
27.4569		438.624	256.219	-0.000676666	0	47.1875	97019.1	4.32222	0.00334794
17.419		438.624	243.156	0.018621	0	44.875	97573.8	5.18392	0.00258109
31.7893		438.624	212.438	0.00187973	0	51.7188	97355	5.18392	0.0018745
26.6615		438.624	256.125	-0.00952028	0	42.875	97412.8	5.18392	0.00271431
29.1667		438.624	248.062	-0.00532297	0	46.5312	97171.9	5.18392	0.00290641
31.3019		438.624	231.031	0.00270471	0	52.6562	97201.2	6.17932	0.00246963
26.1094		438.624	210.531	0.0417396	0	61.8125	97909.7	6.17932	0.00169934
24.1548		438.624	208.531	0.00669639	0	71.9375	97329.1	6.17932	0.00184812
21.5885		438.624	225.219	0.00900651	0	78.0312	97679.7	6.17932	0.00224772
19.0052		438.624	204.656	0.0208042	0	94.7812	97655.3	5.74574	0.00178488
19.375		438.624	209.531	0.0211797	0	114.125	97983.4	5.74574	0.00192881
10.6045		1483.74	194.344	-0.0248816	0	77.5938	85272.5	4.45304	0.00176741
10.1785		1483.74	237.438	-0.0267018	0	62.4375	85390	4.45304	0.00223784
9.968		1483.74	226.469	-0.0300296	0	81.5	85440.9	4.45304	0.00278997
15.375		1483.74	256.625	-0.0049564	0.375	29.625	85064.4	4.45304	0.00312222
15.0417		1483.74	233.906	0.163529	7.625	54.7812	85374.4	4.62371	0.00313475
11.3309		1483.74	261.75	0.0977793	8	30.5	85308.1	4.62371	0.0043145
10.5221	0.208	1483.74	267.781	0.138396	17.75	37.75	85283.8	4.62371	0.00431641
10.5228	0.120875	1483.74	264.969	0.177849	75.5	37.8438	85288.1	4.62371	0.00431428
9.75443	0.125028	1483.74	271.031	0.3066	81.875	42.8125	84755.6	5.07085	0.00391075
9.99108	0.123167	1483.74	299.75	0.264015	56	33.9688	84930.6	5.07085	0.00563812
9.86826	0.2105	1483.74	286	0.203631	29.625	38.7812	84995.3	5.07085	0.00566581
9.78332	0.124875	1483.74	284.781	0.342498	60.625	41.125	84980.6	5.07085	0.00521091
9.87068	0.0918335	1483.74	314.781	0.253801	43.875	40.7812	84864.1	4.56535	0.00782359
9.65543	0.238333	1483.74	313.188	0.244324	28.375	40.8125	84808.1	4.56535	0.0078445
11.0725	0.136733	1483.74	337.406	0.318309	4	42.875	84334.4	4.56535	0.0100932
15.6348	0.1485	1483.74	321.156	0.439293	12.875	38.1875	84758.1	4.56535	0.00966628
10.7225	0.0908	1483.74	304.188	0.409067	100.875	47.0938	84738.1	4.61499	0.00707678
12.7171	0.167345	1483.74	332.125	0.427782	140.75	49.2188	84680	4.61499	0.00733519
10.8021	0.121938	1483.74	318.438	0.339175	232.625	44.375	84625	4.61499	0.00664825
11.1905	0.0824524	1483.74	304.844	0.25961	276.5	47.3438	84735.9	4.61499	0.00553297
12.2955	0.2145	1483.74	321.438	0.224305	269.25	29.0625	85014.4	4.83832	0.00666062
10.0002	0.0753333	1483.74	307.344	0.23685	286.5	35.25	85038.4	4.83832	0.00637603
8.52174	0.0890557	1483.74	300.188	0.295069	282.875	35.375	85222.5	4.83832	0.00658638
11.5828	0.04775	1483.74	290.188	0.149081	248.75	31.7188	85382.2	3.99304	0.00585344
9.36001	0.0369723	1483.74	268.062	0.0628359	159.75	31.3438	85528.1	3.99304	0.00441225
8.70942	0.121	1483.74	288.406	0.120623	107.25	18.8438	85004.4	3.99304	0.00460509
8.34478	0.149	1483.74	244.625	0.239995	48.125	25.0938	85642.8	3.99304	0.00332419
11.0157	0.0683332	1483.74	265.906	0.14106	6.625	21.0312	85619.4	4.35181	0.00456291
8.31248	0.08875	1483.74	264.906	0.110517	0	17.875	85544.4	4.35181	0.00377612
7.9485		1483.74	233.156	0.113593	0	18.1562	85643.8	4.35181	0.00285294
8.00016		1483.74	246.469	-0.00146756	0	12.5938	85735	4.35181	0.00277175
8.1681		1483.74	249.344	-0.00939471	0	12.6875	85317.8	3.48505	0.00273791
7.81077		1483.74	261.344	-0.0077098	0	10.3438	84985	3.48505	0.00276116
6.712		1483.74	222.094	-0.0153652	0	23.875	85738.1	3.48505	0.00177375
9.67194		1483.74	223.406	-0.0172584	0	26.25	85494.7	3.48505	0.00261209
7.25093		1483.74	229.156	-0.0225984	0	20.3438	85560.6	4.00896	0.00192922
9.4692		1483.74	200.219	-0.0221421	0	26.3125	85601.2	4.00896	0.00164334
8.46354		1483.74	252.969	-0.0184998	0	15.1875	85638.1	4.00896	0.002119
8.09375		1483.74	233	-0.0190685	0	23.75	85501.9	4.00896	0.00201869
13.1286		1483.74	208.688	-0.0197997	0	26.375	85529.4	4.86592	0.00175706
13.5774		1483.74	178.969	-0.0222132	0	32.6562	85900.6	4.86592	0.001162
5.74167		1483.74	163.938	-0.0252453	0	40.3438	85734.1	4.86592	0.00134259
7.89286		1483.74	206.656	-0.0152603	0	35.9375	85953.1	4.86592	0.0017135
9.99405		1483.74	187.969	-0.0262174	0	44.9062	85667.5	4.32619	0.00145316
17.1875		1483.74	193.031	-0.0471227	0	52.2188	85975.6	4.32619	0.00142122
24.1932		801.12	200.094	-0.0170036	0	74.3125	92953.4	4.46729	0.00195812
13.7009		801.12	231.781	-0.019197	0	65.8125	93051.9	4.46729	0.00259241
14.9215		801.12	226.656	0.0171601	0	85.0312	93002.8	4.46729	0.00311631
12.095		801.12	260.781	0.0155007	160.5	40.0625	92561.2	4.46729	0.00358025
19.9047		801.12	234.844	0.0658631	18	65.0625	92910	4.68961	0.00344931
12.1748		801.12	270.188	0.0968871	24.875	40.5625	92603.4	4.68961	0.00416838
9.06221	0.17	801.12	287.188	0.131558	51.125	46.3438	92449.1	4.68961	0.00415244
14.0425	0.102292	801.12	281.625	0.124049	123	48.0312	92523.1	4.68961	0.00441575
12.6111	0.0905	801.12	292.906	0.220364	141.25	51.2812	91847.8	5.11917	0.00398531
9.55072	0.125875	801.12	310.406	0.192986	125.75	48.25	92049.4	5.11917	0.00560269
7.07609	0.12025	801.12	307.094	0.192484	97.625	48.5	92138.1	5.11917	0.00561709
8.38095	0.154833	801.12	293.062	0.259208	141.375	55.0625	92164.7	5.11917	0.00489153
7.65332	0.102722	801.12	334.5	0.165384	128	53.4375	91878.1	4.61505	0.00752241
8.24949	0.245167	801.12	335.156	0.195119	111.375	52.3125	91826.6	4.61505	0.00744191
7.43556	0.134194	801.12	360.906	0.244848	85.125	56.5625	91187.8	4.61505	0.0094025
13.7892	0.1985	801.12	342.25	0.24577	59.875	50.6562	91752.5	4.61505	0.00906353
7.24728	0.139375	801.12	326.281	0.31745	151.875	56.75	91729.1	4.60549	0.00695428
11.2398	0.153115	801.12	357.531	0.2142	197.125	58.7188	91464.7	4.60549	0.00687122
12.1736	0.162653	801.12	346.562	0.220304	288.625	52.4688	91499.7	4.60549	0.00660925
10.298	0.0948451	801.12	329.812	0.227673	332.125	56.4062	91622.2	4.60549	0.00536419
12.1664	0.213	801.12	337.375	0.25385	339.125	39.2188	92060	4.92819	0.00662066
11.0536	0.0819166	801.12	328.594	0.203362	359.5	44.0938	91998.8	4.92819	0.00615609
11.5544	0.1593	801.12	318.156	0.25487	358.625	44.2188	92271.9	4.92819	0.00640822
9.53272	0.12775	801.12	304.031	0.190738	329.75	41.2812	92553.8	4.00427	0.00583037
8.96186	0.0724723	801.12	287.656	0.0608574	245.375	37.4688	92745	4.00427	0.00454684
8.25621	0.12375	801.12	289.719	0.140621	198.75	27.7188	92302.8	4.00427	0.00499806
10.2994	0.174833	801.12	256.156	0.186415	149.5	32.4688	93091.2	4.00427	0.00350984
13.2013	0.115117	801.12	275.5	0.11547	155.75	27.5625	92900.6	4.37508	0.00478153
9.10772	0.0906875	801.12	278.156	0.0904263	131.625	22.4375	92895.9	4.37508	0.00398903
11.5769	0.111	801.12	243.969	0.0992697	93.25	22.25	93157.5	4.37508	0.00302791
15.2399	0.096	801.12	255	0.0318589	61.625	16.2812	93256.6	4.37508	0.00305259
11.9261	0.1415	801.12	252.594	-0.00456115	13	17.0312	92840	3.42648	0.00308091
10.1955		801.12	251.562	-0.0168768	0	13.5	92546.9	3.42648	0.00316334
14.8184		801.12	222.25	-0.0136886	0	20	93428.4	3.42648	0.00222019
20.9113		801.12	232.094	-0.0240318	0	18.8438	93071.9	3.42648	0.00281309
15.3338		801.12	230.25	-0.0349745	0	19.4375	93260.9	3.9893	0.00239519
24.55		801.12	206.562	-0.0190183	0	21.1875	93345.9	3.9893	0.00183194
21.2031		801.12	245.156	-0.0249954	0	18.8438	93357.8	3.9893	0.00237206
19.0469		801.12	232.562	-0.015422	0	21.75	93195.9	3.9893	0.00227547
23.4429		801.12	209.125	-0.0227243	0	27.5625	93247.2	4.5652	0.00181347
34.375		801.12	181.844	-0.0207042	0	38.9688	93810.3	4.5652	0.00109141
18.1607		801.12	176.406	-0.02548	0	44.9688	93547.8	4.5652	0.00136184
16.1369		801.12	209.375	-0.0195157	0	42.7188	93742.2	4.5652	0.00179991
13.9236		801.12	193.688	-0.016127	0	60.9688	93509.4	4.10392	0.00152606
25.3583		801.12	192.625	-0.0266719	0	78.375	93829.4	4.10392	0.00123016
82.6462		529.376	223.719	0.0288727	135.75	125.531	96122.2	3.46164	0.00209063
35.8056		529.376	245.031	0.070284	119.5	59.5625	96294.7	3.46164	0.00304122
34.7636	0.24	529.376	256.781	0.101115	106.5	69.4062	96078.4	3.46164	0.00438456
21.1555		529.376	285.25	0.0125708	142.25	30.6562	95815.6	3.46164	0.00458716
29.7376	0.192	529.376	262.562	0.0866959	185.625	51.0625	96029.1	4.11338	0.00420337
30.4667	0.12145	529.376	305.031	0.143371	175	40.4375	95677.2	4.11338	0.00512247
21.7266	0.147229	529.376	312.188	0.237517	272.25	49	95469.7	4.11338	0.00453516
32.0743	0.0877	529.376	316.688	0.258324	306.125	46.4688	95651.2	4.11338	0.00486738
47.3431	0.151	529.376	342.281	0.268745	280.75	48.9688	94974.1	4.57893	0.00652291
51.3818	0.20575	529.376	344.375	0.152386	259.125	43.0625	95254.7	4.57893	0.00644309
23.7788	0.115867	529.376	343.031	0.28932	267	44.875	95319.4	4.57893	0.00708137
28.1001	0.08735	529.376	320.969	0.296518	322.625	58.4375	95311.2	4.57893	0.005121
20.2243	0.0895557	529.376	361.219	0.28022	291.25	55.4688	95048.4	4.57362	0.00712756
22.4103	0.163133	529.376	349.188	0.321596	267.375	52	94904.1	4.57362	0.00716103
26.5645	0.132944	529.376	377.438	0.221818	267.5	54.9375	94149.4	4.57362	0.00948544
17.176	0.108111	529.376	365.594	0.395348	294.625	55.25	94783.4	4.57362	0.00822766
25.9846	0.1092	529.376	357.438	0.327214	402	59.5312	94702.5	4.2041	0.00783078
31.2064	0.150958	529.376	383.344	0.424885	416.25	64.2188	94253.8	4.2041	0.00697747
28.6216	0.224167	529.376	402.656	0.271219	456.125	49.75	94512.8	4.2041	0.0118157
25.9793	0.134833	529.376	370.125	0.316502	425.625	54.8438	94572.2	4.2041	0.00672006
33.529	0.1634	529.376	357.094	0.389145	437	51.0625	95166.2	4.55792	0.00734103
25.7558	0.126375	529.376	348.031	0.302203	410.5	53.2812	94888.8	4.55792	0.00656903
20.6678	0.404722	529.376	361.094	0.286903	373	40.5938	95346.6	4.55792	0.00962128
18.0025	0.1894	529.376	343.031	0.344541	403	40.2188	95643.4	4.13041	0.00743169
42.9298	0.191643	529.376	320.812	0.365562	330.75	42.875	95771.2	4.13041	0.00608034
21.5432	0.206067	529.376	312.688	0.220955	282.5	38.3438	95429.4	4.13041	0.00619581
17.4091	0.174833	529.376	291.875	0.249386	308.75	33.3125	96260.6	4.13041	0.00458928
34.755	0.153722	529.376	298.219	0.239513	292.5	35.6875	95840	3.55034	0.00473891
24.3243	0.226333	529.376	306.156	0.109506	271	27.125	95943.8	3.55034	0.00530716
20.343	0.185833	529.376	275.281	0.173156	240.25	25.0312	96378.4	3.55034	0.00413009
29.9772	0.205	529.376	268.438	0.190257	182.25	21.0625	96359.4	3.55034	0.00361028
27.1955	0.31725	529.376	250.5	0.0672534	158.25	29.75	95925.9	2.7906	0.00342697
27.532	0.19	529.376	266.625	0.00499846	121.5	16.0938	95717.5	2.7906	0.0037155
28.3155	0.2275	529.376	238.5	0.0312189	94.75	20.0625	96639.4	2.7906	0.002914
28.14		529.376	248.531	0.00586754	0	17.8125	96187.8	2.7906	0.00297428
31.1916		529.376	241.562	0.000516725	0	32.6562	96610.3	2.40313	0.00253547
109.994		529.376	199.438	-0.00110433	0	49.3125	96588.1	2.40313	0.00127809
138.984		529.376	219.156	-0.00233953	0	45.3125	96569.1	2.40313	0.00173862
92.8056		529.376	223.812	0.00486352	0	46.75	96340.9	2.40313	0.00197313
72.3281		529.376	212.375	0.00209995	0	53.5625	96456.2	2.00776	0.00142637
86.6719		529.376	203.594	-0.000371268	0	64.1875	97135.6	2.00776	0.00115041
150.88		529.376	189.062	0.00290887	0	77	96738.4	2.00776	0.000837781
133.604		529.376	210.438	-0.00107646	0	84.6562	96976.6	2.00776	0.00119628
97.099		529.376	203.094	0.00554328	0	96.6562	96829.1	2.6502	0.00123016
120.536		529.376	206.938	-0.00185115	0	111.125	97159.4	2.6502	0.00124237
		529.376	223.719	0.0355195	166.875	125.531	96122.2	3.73703	0.00209063
		529.376	245.031	0.0644844	151.625	59.5625	96294.7	3.73703	0.00304122
	0.151	529.376	256.781	0.0970176	139.25	69.4062	96078.4	3.73703	0.00438456
	0.272	529.376	285.25	0.0133799	118.875	30.6562	95815.6	3.73703	0.00458716
	0.051	529.376	262.562	0.0880634	182.375	51.0625	96029.1	4.28297	0.00420337
	0.1288	529.376	305.031	0.132359	196.375	40.4375	95677.2	4.28297	0.00512247
	0.145958	529.376	312.188	0.217365	289.25	49	95469.7	4.28297	0.00453516
	0.0751	529.376	316.688	0.236475	321	46.4688	95651.2	4.28297	0.00486738
27.2451	0.1657	529.376	342.281	0.237935	301.875	48.9688	94974.1	4.79459	0.00652291
34.712	0.224	529.376	344.375	0.142019	281.75	43.0625	95254.7	4.79459	0.00644309
28.5114	0.094125	529.376	343.031	0.274001	284.125	44.875	95319.4	4.79459	0.00708137
37.2789	0.0991334	529.376	320.969	0.294374	345.5	58.4375	95311.2	4.79459	0.005121
23.5998	0.102389	529.376	361.219	0.260783	315.625	55.4688	95048.4	4.73099	0.00712756
24.4872	0.204111	529.376	349.188	0.292996	297.5	52	94904.1	4.73099	0.00716103
27.7314	0.147389	529.376	377.438	0.207313	291.5	54.9375	94149.4	4.73099	0.00948544
24.8361	0.123194	529.376	365.594	0.36935	313.125	55.25	94783.4	4.73099	0.00822766
28.3558	0.111	529.376	357.438	0.299714	416.125	59.5312	94702.5	4.27428	0.00783078
27.7034	0.168792	529.376	383.344	0.3822	429.5	64.2188	94253.8	4.27428	0.00697747
34.8125	0.197833	529.376	402.656	0.237144	467.125	49.75	94512.8	4.27428	0.0118157
22.7928	0.152639	529.376	370.125	0.276187	429.125	54.8438	94572.2	4.27428	0.00672006
26.6558	0.198667	529.376	357.094	0.321914	441	51.0625	95166.2	4.6734	0.00734103
31.0451	0.148097	529.376	348.031	0.284136	415.75	53.2812	94888.8	4.6734	0.00656903
25.1391	0.403875	529.376	361.094	0.258483	382.625	40.5938	95346.6	4.6734	0.00962128
23.524	0.1797	529.376	343.031	0.315333	415.75	40.2188	95643.4	4.30214	0.00743169
48.2663	0.201643	529.376	320.812	0.355634	342.125	42.875	95771.2	4.30214	0.00608034
21.8762	0.204033	529.376	312.688	0.224754	292.625	38.3438	95429.4	4.30214	0.00619581
19.0968	0.151834	529.376	291.875	0.183207	318.75	33.3125	96260.6	4.30214	0.00458928
34.332	0.154111	529.376	298.219	0.247867	306.125	35.6875	95840	3.75577	0.00473891
31.0023	0.234533	529.376	306.156	0.109907	281	27.125	95943.8	3.75577	0.00530716
26.3574	0.184083	529.376	275.281	0.176578	248.875	25.0312	96378.4	3.75577	0.00413009
42.2642	0.2065	529.376	268.438	0.150111	196.625	21.0625	96359.4	3.75577	0.00361028
41.1101	0.261	529.376	250.5	0.0728562	174.125	29.75	95925.9	3.03591	0.00342697
45.0955	0.189	529.376	266.625	0.00356122	139.375	16.0938	95717.5	3.03591	0.0037155
48.3889	0.239	529.376	238.5	0.0270414	114.875	20.0625	96639.4	3.03591	0.002914
51.3589		529.376	248.531	0.0101114	1.375	17.8125	96187.8	3.03591	0.00297428
47.4029		529.376	241.562	-0.0055647	0	32.6562	96610.3	2.6754	0.00253547
192.582		529.376	199.438	-0.00132305	0	49.3125	96588.1	2.6754	0.00127809
243.948		529.376	219.156	-0.00345461	0	45.3125	96569.1	2.6754	0.00173862
149.229		529.376	223.812	-0.00202564	0	46.75	96340.9	2.6754	0.00197313
146.134		529.376	212.375	0.0014234	0	53.5625	96456.2	2.33257	0.00142637
138.49		529.376	203.594	-0.00335547	0	64.1875	97135.6	2.33257	0.00115041
241.922		529.376	189.062	0.000839043	0	77	96738.4	2.33257	0.000837781
224.938		529.376	210.438	-0.00586497	0	84.6562	96976.6	2.33257	0.00119628
178.946		529.376	203.094	0.003413	0	96.6562	96829.1	2.93375	0.00123016
206.196		529.376	206.938	-0.00124959	0	111.125	97159.4	2.93375	0.00124237
39.2477		505.056	217.938	0.092341	0.25	161.969	96315.9	3.54095	0.00206641
22.6298	0.171333	505.056	247.188	0.0633904	2.625	68.1562	96467.8	3.54095	0.002845
40.6248	0.180958	505.056	259.094	0.0775108	0.5	49.9062	96268.8	3.54095	0.00341713
39.5912	0.192	505.056	282.844	0.040054	51	39.7812	95985.6	3.54095	0.00424416
36.0753	0.2197	505.056	264	0.097255	78.125	64.9688	96236.6	4.21183	0.00379959
37.5685	0.1523	505.056	307.094	0.109795	104.375	48.9062	95878.4	4.21183	0.00481937
28.623	0.128833	505.056	313.719	0.153818	209.25	62.4062	95704.1	4.21183	0.00592319
37.3434	0.1153	505.056	313.062	0.10531	246.375	56.5312	95858.4	4.21183	0.00539197
44.8748	0.1638	505.056	341.844	0.137337	231.25	58.4688	95158.1	4.71274	0.00810756
34.9476	0.17225	505.056	351.656	0.148876	211.375	52.1562	95462.5	4.71274	0.00787997
31.6765	0.15725	505.056	346.344	0.206144	223.5	56.1875	95504.4	4.71274	0.00807269
35.476	0.147167	505.056	323.719	0.211913	285.625	69.2188	95506.6	4.71274	0.00564153
31.4185	0.153667	505.056	371	0.180532	256.625	57.9375	95229.4	4.6622	0.00845178
29.3239	0.24425	505.056	349.375	0.215045	216.625	63.25	95111.2	4.6622	0.00764672
28.5858	0.191416	505.056	381.031	0.181568	186.625	59.6562	94352.2	4.6622	0.0106072
19.9304	0.1366	505.056	365.562	0.244756	205.375	68.8438	94973.1	4.6622	0.00837922
34.4941	0.0888334	505.056	356.969	0.280869	302.625	68.9062	94921.6	4.38425	0.00836878
40.9968	0.114604	505.056	376.656	0.254368	321.875	75.7812	94459.7	4.38425	0.00684772
51.5735	0.2499	505.056	399.531	0.206679	369.625	53.5938	94695	4.38425	0.0114649
35.0894	0.1224	505.056	369.344	0.178775	349.75	68.0938	94756.6	4.38425	0.00702194
27.3974	0.14675	505.056	356.469	0.226218	374.75	52.3125	95347.5	4.72367	0.00720125
35.1169	0.0978333	505.056	339.281	0.264571	365.5	66.0625	95114.7	4.72367	0.005873
27.6396	0.324667	505.056	361.031	0.192372	342.5	54.3438	95500.6	4.72367	0.00869862
34.4847	0.1425	505.056	341.438	0.22002	372	50.9688	95827.8	4.18598	0.00770469
45.4403	0.135119	505.056	317.812	0.204578	369.5	52.1875	95988.8	4.18598	0.00595991
27.4387	0.1395	505.056	315.969	0.176707	338.625	46.5625	95626.6	4.18598	0.00631397
28.5269	0.142167	505.056	287.312	0.204948	359.375	40.9688	96440.9	4.18598	0.00427991
61.4731	0.123125	505.056	294.406	0.167944	358	44.3125	96042.5	3.77504	0.00390513
51.9713	0.156208	505.056	304.688	0.149146	324.125	35.8438	96108.1	3.77504	0.00491697
35.7432	0.167542	505.056	271.719	0.124471	271.5	31.5938	96578.4	3.77504	0.00381675
68.1704	0.12725	505.056	264.75	0.0827355	217	26.6875	96537.2	3.77504	0.00301466
90.515	0.28625	505.056	247.406	0.0740053	188.375	43.0625	96123.1	2.80286	0.00333022
67.3948		505.056	264.156	0.0271197	147.25	20.7188	95905	2.80286	0.00345956
48.5043		505.056	245.625	0.0416394	124.375	24.3125	96827.8	2.80286	0.00267494
77.6572		505.056	249.312	-0.00586968	36	25	96367.5	2.80286	0.00284941
63.2329		505.056	243	-0.0171528	0	44.6875	96789.1	2.52108	0.0026185
276.32		505.056	200.938	-0.0175889	0	68.2188	96783.1	2.52108	0.00152784
329.568		505.056	219.094	-0.00855061	0	67.4688	96760	2.52108	0.00206106
188.927		505.056	227.594	-0.000269769	0	67.75	96524.4	2.52108	0.00217922
145.45		505.056	217	-0.00600673	0	71.6875	96639.4	1.93441	0.00163469
164.774		505.056	207.281	-0.0104001	0	80.3125	97324.1	1.93441	0.00131997
246.13		505.056	189.812	-0.00471464	0	97.4375	96903.8	1.93441	0.00105313
253.839		505.056	209.812	-0.00818043	0	106.25	97147.8	1.93441	0.00148203
196.953		505.056	207.219	-0.00364907	0	119.562	96998.1	2.47294	0.00144294
182.756		505.056	213.438	-0.00306889	0	133.812	97333.4	2.47294	0.00149834

## Sheet: 16
y	x1	x2	x3	x4	x5	x6	x7	x8	x9
107.155		772.448	233.688	0.00571151	4.5	122.562	93370	4.04016	0.00254284
101.127		772.448	232.219	0.0188754	0.125	119.656	92763.4	4.04016	0.00287859
72.1528	0.027	772.448	267.469	0.00991011	8.25	41.9688	92976.2	4.04016	0.00379872
50.8347	0.15	772.448	297.562	0.0724364	15.375	45.125	92649.1	4.04016	0.00563581
32.7431	0.157625	772.448	302.688	0.0587682	28.5	48.125	92725.9	4.72749	0.00622909
21.6806	0.116833	772.448	278.969	0.0826087	40	55.1875	92763.4	4.72749	0.00437691
23.3361	0.07975	772.448	289.281	0.183585	120	63.0625	92669.1	4.72749	0.00389181
20.1622	0.1735	772.448	311.125	0.16218	62.875	53.125	92475.6	4.72749	0.00557466
24.0109	0.1805	772.448	313.688	0.211076	25.25	54.375	92513.8	5.22823	0.00628109
21.663	0.1977	772.448	307.094	0.247646	25	58.1562	92577.2	5.22823	0.00570347
21.2623	0.127854	772.448	284.75	0.322466	84.375	75.0312	92635	5.22823	0.00416725
20.4028	0.1903	772.448	335.875	0.25818	128.375	62.6875	92214.4	5.22823	0.00690206
26.4617	0.128042	772.448	352.688	0.324204	269.25	70.3438	92232.8	4.50164	0.00722372
30.5	0.1357	772.448	359.969	0.284932	265	59.25	92092.8	4.50164	0.0095215
20.2333	0.175667	772.448	344.406	0.34305	198.375	62.75	92350.9	4.50164	0.00905725
25.0583	0.166944	772.448	359.906	0.251112	226	64.4375	91758.4	4.50164	0.0104955
18.1667	0.143945	772.448	351.281	0.335171	209.375	66.2188	92072.2	4.20759	0.00834631
19.9598	0.112267	772.448	366.5	0.284392	234.875	62.25	91847.8	4.20759	0.0107995
25.4107	0.211028	772.448	375.031	0.258227	249.625	56.6875	92027.2	4.20759	0.0110777
25.5574	0.27975	772.448	371.5	0.226221	235.875	49.1875	92283.4	4.20759	0.0111634
25.9094	0.182133	772.448	360.031	0.0786212	247.875	56.4062	92138.1	3.90653	0.0101881
22.2708	0.256167	772.448	358.844	0.248222	257.125	55.2188	92364.7	3.90653	0.0102352
33.4964	0.1886	772.448	345.594	0.260088	324.875	53.5312	92485	3.90653	0.00806194
26.4219	0.125381	772.448	327.5	0.232526	401.125	55.1875	92404.7	3.9035	0.00619884
26.15	0.126429	772.448	333.438	0.245168	467.375	48.625	92550.9	3.9035	0.00771087
28.6643	0.152556	772.448	333.219	0.198268	520.75	47.4062	92565.3	3.9035	0.00774006
34.5332	0.18225	772.448	318.125	0.193674	502.75	37.875	92701.6	3.9035	0.00658753
36.7099	0.221533	772.448	267.875	0.202615	490.875	40.7812	93268.8	3.80594	0.00437459
78.5587	0.265722	772.448	279.781	0.0352449	473.875	35.3438	92714.1	3.80594	0.00428816
43.1583	0.39	772.448	255.188	0.0785211	422.875	27.1562	93534.4	3.80594	0.00339872
92.4534	0.259917	772.448	239.094	0.074989	367	33.5	93433.4	3.80594	0.00238738
54.2014	0.2015	772.448	246.469	0.0685875	342.125	26.875	93470.9	3.72812	0.00275991
85.1263	0.1875	772.448	233.125	0.0155676	296.875	30.5	93006.9	3.72812	0.00275853
99.4226		772.448	204.094	0.0189816	276.125	49.1875	94149.7	3.72812	0.00151491
254.343		772.448	221.875	0.00949746	252.125	52.4062	93543.1	3.72812	0.002584
106.808		772.448	240.969	0.0046906	200.25	48.3125	93083.1	3.32685	0.00268841
109.469		772.448	227	0.0053461	122.625	35.125	93336.6	3.32685	0.00200531
143.518		772.448	214.281	0.00226962	73.875	53.625	93570.9	3.32685	0.00183312
205.333		772.448	212	0.00880208	24.875	58.5938	93365.6	3.32685	0.00185322
241.179		772.448	198.312	0.00750246	0	65.875	93583.4	3.39273	0.00145981
293.016		772.448	192.906	0.00741471	0	75.625	93688.1	3.39273	0.00130019
185.194		772.448	215.062	0.00484686	0	76.3438	93368.8	3.39273	0.00165478
192.844		772.448	218.719	0.010701	0	87.375	93375.9	3.39273	0.00167187
200.482		772.448	213.5	0.00798525	0	102.156	93399.1	3.3464	0.00182887
129.323		772.448	225.531	-0.000506538	0	100.969	93393.1	3.3464	0.00221563
94.4429		1197.15	220.875	0.0204704	87.875	77.0938	88625	3.98018	0.00236166
99.6686		1197.15	226.75	0.00803077	82.75	94.9375	88066.6	3.98018	0.00287122
64.2326	0.0895	1197.15	257.531	0.034399	81.25	39.75	88334.4	3.98018	0.00362919
42.1741	0.156125	1197.15	284.969	0.0692897	76.375	42.5625	88107.8	3.98018	0.00521737
30.5774	0.110167	1197.15	289.531	0.0850836	76.125	46.5938	88172.5	4.5943	0.00564234
25.4514	0.071	1197.15	258.812	0.146234	118.625	54.5625	88207.2	4.5943	0.00389425
31.3183	0.115736	1197.15	268.562	0.176407	237.25	62.4062	88184.4	4.5943	0.00339244
31.46	0.131222	1197.15	291.406	0.147708	217.875	55.5312	87963.1	4.5943	0.00510525
30.4598	0.2025	1197.15	298.594	0.257376	206.125	51.9688	88007.8	5.35835	0.00586119
32.9873	0.184167	1197.15	292.656	0.248471	227.125	54.8125	88079.4	5.35835	0.00524641
30.1976	0.129	1197.15	268.5	0.195222	308.75	73.0625	88155.9	5.35835	0.00377009
39.8958	0.238917	1197.15	320.156	0.277369	354	59.5	87815.6	5.35835	0.00646934
40.3292	0.117708	1197.15	330.188	0.263951	487.625	68.6875	87917.5	4.43961	0.00680625
50.7708	0.12025	1197.15	344.469	0.277945	489.375	57.3125	87727.2	4.43961	0.00906609
22.7708	0.164905	1197.15	327.469	0.267902	437	59.9688	87939.4	4.43961	0.00858225
44.8929	0.168028	1197.15	340.344	0.304922	449.875	63.0312	87422.8	4.43961	0.00989178
38.0242	0.12875	1197.15	330.094	0.291655	425.875	63.4062	87733.4	3.95932	0.00787606
40.6001	0.143083	1197.15	350.094	0.297951	441.375	58.6562	87510	3.95932	0.0104267
47.2683	0.1965	1197.15	358.125	0.184962	453.875	53.5312	87698.8	3.95932	0.0107607
32.3182	0.23825	1197.15	355.25	0.196425	438.375	46.0938	87889.4	3.95932	0.0105773
37.9708	0.1561	1197.15	339.594	0.0933369	448.25	55.625	87785.6	3.70408	0.00975475
24.6344	0.22775	1197.15	347.281	0.152452	459.375	50.6562	87954.4	3.70408	0.00974519
52.1042	0.1525	1197.15	331.562	0.280559	518.375	50.4375	88116.9	3.70408	0.00782228
40.0486	0.114809	1197.15	308.719	0.209951	574.375	53.7188	88026.6	3.49115	0.00599291
30.5587	0.128429	1197.15	316.969	0.194515	618.75	46.5	88150	3.49115	0.00732269
42.4475	0.156476	1197.15	314.938	0.153427	653.875	45.9688	88163.1	3.49115	0.00746878
37.9031	0.163667	1197.15	303.156	0.152459	636.625	37.2188	88209.7	3.49115	0.00630772
53.7917	0.2098	1197.15	255.094	0.122502	628.625	39.5	88660.6	3.79047	0.00409022
	0.239278	1197.15	266.844	0.0090118	618.75	35.875	88151.6	3.79047	0.00394881
44.5833		1197.15	251.062	0.115313	596.75	26.25	88759.1	3.79047	0.003088
63.0857	0.23625	1197.15	226.781	0.0727276	582.375	39.125	88782.2	3.79047	0.00233309
35.2188	0.220167	1197.15	231.969	0.0504376	570.25	42.8125	88775	3.84768	0.00269291
41.491	0.216	1197.15	225.844	0.00514509	550.625	36.125	88234.7	3.84768	0.00259713
39.7417		1197.15	199.844	0.0503292	536.25	54.1875	89221.2	3.84768	0.00143516
		1197.15	212.5	0.0158312	520.75	54.0312	88838.1	3.84768	0.00246678
76.6667		1197.15	237.125	0.0104248	481.375	45.1562	88340.9	3.65139	0.00274038
82.9067		1197.15	219.844	0.00985634	423.25	36.75	88578.4	3.65139	0.00195469
96.602		1197.15	206.406	0.0165518	397.625	51.7188	88754.4	3.65139	0.0017505
120.25		1197.15	201.25	0.0208255	376.375	58.5625	88566.9	3.65139	0.00174187
253.312		1197.15	188.938	0.00335359	354.375	66.75	88731.9	3.7369	0.001389
207.619		1197.15	186.438	0.0107755	333.875	77.0938	88841.6	3.7369	0.00140875
201.863		1197.15	211.844	0.0105373	312.5	73.9062	88530.6	3.7369	0.00173778
157.819		1197.15	214.062	0.0113368	293.625	86.8125	88516.2	3.7369	0.00170953
182.125		1197.15	209.5	0.00640155	278.875	100.062	88593.1	3.69629	0.00192016
104.188		1197.15	219.719	0.00188317	271.5	102.031	88590	3.69629	0.00224616
150.5		763.744	233.938	-0.00481553	0	128.438	93197.2	4.11865	0.00230956
156.59		763.744	233.094	-0.00569595	0	127.219	92598.1	4.11865	0.00266656
105.731	0.158667	763.744	268.688	0.0415839	6.375	41.1562	92804.7	4.11865	0.00385634
68.5655	0.222	763.744	300.5	0.0830611	13.875	42.1875	92476.2	4.11865	0.00570406
45.8333	0.174	763.744	306.062	0.101743	18.875	46.2812	92561.2	4.90261	0.00634619
21.875	0.133875	763.744	281.719	0.136485	23.5	53.1875	92580.6	4.90261	0.00459803
36.0556	0.149952	763.744	292.188	0.194155	104.875	61.4375	92485.3	4.90261	0.00399372
48.5417	0.215333	763.744	315.188	0.206392	45.125	49.4062	92304.4	4.90261	0.00586512
31.4722	0.16825	763.744	319.906	0.226233	11.625	48.75	92345.3	5.16524	0.00662263
32.2292	0.225625	763.744	311.156	0.286052	7.875	56.0312	92398.8	5.16524	0.00598837
24.1495	0.137729	763.744	288.594	0.294474	47.125	72.8438	92456.6	5.16524	0.00451837
28.5417	0.2144	763.744	338.406	0.347209	94.625	61.5	92042.8	5.16524	0.00719634
44.2429	0.141167	763.744	355.594	0.290619	207.5	68.75	92054.1	4.63843	0.00755556
38.5476	0.1562	763.744	364.531	0.362183	169.25	55.7812	91923.4	4.63843	0.00989706
25.7798	0.13169	763.744	346.375	0.463526	50.375	60.875	92185	4.63843	0.00942691
40.5476	0.166286	763.744	361.688	0.459009	82.375	63.1875	91598.4	4.63843	0.0109769
26.0972	0.134014	763.744	353.25	0.423067	69.75	65.125	91899.7	4.45996	0.0086055
32.994	0.1207	763.744	368.125	0.474422	109.875	61.0312	91685.6	4.45996	0.0110811
30.9688	0.208556	763.744	376.719	0.514888	108.625	56.875	91861.9	4.45996	0.011339
32.8591	0.2226	763.744	371.531	0.485157	82.5	50.5	92136.2	4.45996	0.0112189
38.1626	0.1411	763.744	363.375	0.269838	105.25	55.375	91977.8	4.09241	0.0104603
32.8754	0.2525	763.744	361.25	0.360322	122.75	52.5	92216.9	4.09241	0.01044
52.8125	0.148708	763.744	349.125	0.36087	196.125	50.75	92324.7	4.09241	0.00848384
66.0417	0.101643	763.744	331.125	0.273547	287.375	53.4062	92233.1	4.22976	0.00651466
47.0393	0.102208	763.744	337.406	0.389265	359.375	46.4688	92381.9	4.22976	0.008108
43.0195	0.149	763.744	339.094	0.332087	408.125	45.4062	92392.5	4.22976	0.00796969
48.9565	0.157667	763.744	321.25	0.199311	365.25	36.125	92534.4	4.22976	0.00689619
39.3315	0.204133	763.744	271.469	0.223689	348.5	39.4375	93091.6	3.89828	0.00451331
75.6576	0.2735	763.744	281	0.0299999	327	33.8438	92551.6	3.89828	0.00439512
49.3224		763.744	261.656	0.147941	276.875	25.75	93379.7	3.89828	0.00347781
118.947	0.265133	763.744	240.406	0.122261	194.375	32.7188	93255	3.89828	0.00257891
80.2604	0.24625	763.744	247.594	0.0651754	142.5	28	93293.4	3.67316	0.00292144
66.2819	0.1375	763.744	239.75	0.032657	83.5	30.375	92854.4	3.67316	0.00282672
174.435		763.744	205.625	0.016427	47.75	49.4688	93998.1	3.67316	0.00154344
289.861		763.744	222.344	0.00513614	10	53.2812	93371.6	3.67316	0.00255988
97.872		763.744	244.406	0.00684672	0	47.2812	92930.6	3.098	0.002645
140.098		763.744	228.875	0.00477423	0	34.5	93176.6	3.098	0.0019685
164.941		763.744	215.406	0.00915958	0	53	93403.8	3.098	0.00170988
203.45		763.744	213.688	0.00849896	0	57.6875	93195.6	3.098	0.00176369
274.449		763.744	197.875	0.0109441	0	66.375	93411.6	3.10407	0.00138622
305.764		763.744	193.281	0.0167991	0	75.6875	93518.1	3.10407	0.00119619
350.729		763.744	216.625	0.0124478	0	75.6562	93215.6	3.10407	0.00159969
313.025		763.744	220.062	0.0167109	0	86.8125	93227.2	3.10407	0.00164981
288.708		763.744	215.875	0.00755313	0	102.25	93242.2	3.15169	0.00172341
124.708		763.744	225.5	0.00182532	0	104.875	93232.5	3.15169	0.00205472
112.476		772.448	233.688	-0.00684827	0.125	122.562	93370	4.04016	0.00254284
95.0985		772.448	232.219	-0.00138455	0	119.656	92763.4	4.04016	0.00287859
72.8547	0.265333	772.448	267.469	0.0243809	6.625	41.9688	92976.2	4.04016	0.00379872
42.9876	0.1515	772.448	297.562	0.0578983	13.75	45.125	92649.1	4.04016	0.00563581
27.9722	0.1605	772.448	302.688	0.0746843	23.25	48.125	92725.9	4.72749	0.00622909
18.8542	0.143667	772.448	278.969	0.103462	24.625	55.1875	92763.4	4.72749	0.00437691
24.189	0.122226	772.448	289.281	0.151065	105	63.0625	92669.1	4.72749	0.00389181
21.7045	0.1665	772.448	311.125	0.176053	40.625	53.125	92475.6	4.72749	0.00557466
22.9048	0.197	772.448	313.688	0.230777	5.5	54.375	92513.8	5.22823	0.00628109
32.2482	0.21775	772.448	307.094	0.257173	3.875	58.1562	92577.2	5.22823	0.00570347
31.7896	0.118583	772.448	284.75	0.236356	49.375	75.0312	92635	5.22823	0.00416725
31.8889	0.191	772.448	335.875	0.281368	96.625	62.6875	92214.4	5.22823	0.00690206
30.2917	0.11119	772.448	352.688	0.261232	222.125	70.3438	92232.8	4.50164	0.00722372
17.7953	0.115875	772.448	359.969	0.181211	197.5	59.25	92092.8	4.50164	0.0095215
13.9583	0.162619	772.448	344.406	0.327864	99.75	62.75	92350.9	4.50164	0.00905725
25.6875	0.154472	772.448	359.906	0.244716	129.625	64.4375	91758.4	4.50164	0.0104955
20.2722	0.150319	772.448	351.281	0.324253	116.25	66.2188	92072.2	4.20759	0.00834631
18.786	0.1051	772.448	366.5	0.265128	146.625	62.25	91847.8	4.20759	0.0107995
29.9883	0.206667	772.448	375.031	0.249393	156.5	56.6875	92027.2	4.20759	0.0110777
28.8333	0.2385	772.448	371.5	0.224863	137	49.1875	92283.4	4.20759	0.0111634
30.6265	0.1648	772.448	360.031	0.169131	154.625	56.4062	92138.1	3.90653	0.0101881
26.6111	0.262875	772.448	358.844	0.199505	170.375	55.2188	92364.7	3.90653	0.0102352
28.0678	0.156208	772.448	345.594	0.265964	240.75	53.5312	92485	3.90653	0.00806194
25.2857	0.123021	772.448	327.5	0.212399	330.375	55.1875	92404.7	3.9035	0.00619884
26.3354	0.125125	772.448	333.438	0.216655	403.5	48.625	92550.9	3.9035	0.00771087
26.438	0.143133	772.448	333.219	0.139435	455.5	47.4062	92565.3	3.9035	0.00774006
30.8373	0.172708	772.448	318.125	0.185778	428.625	37.875	92701.6	3.9035	0.00658753
24.1832	0.2222	772.448	267.875	0.119929	405.875	40.7812	93268.8	3.80594	0.00437459
50.375	0.2855	772.448	279.781	0.0159968	376.125	35.3438	92714.1	3.80594	0.00428816
39.9981	0.325	772.448	255.188	0.102797	329	27.1562	93534.4	3.80594	0.00339872
70.6865	0.2367	772.448	239.094	0.0652431	276.875	33.5	93433.4	3.80594	0.00238738
40.0452	0.196292	772.448	246.469	0.0152943	238.375	26.875	93470.9	3.72812	0.00275991
51.3772	0.18	772.448	233.125	0.000731666	205.625	30.5	93006.9	3.72812	0.00275853
		772.448	204.094	0.00939512	177.75	49.1875	94149.7	3.72812	0.00151491
		772.448	221.875	-0.00381522	147.375	52.4062	93543.1	3.72812	0.002584
105.75		772.448	240.969	0.00453458	87.875	48.3125	93083.1	3.32685	0.00268841
106.906		772.448	227	-0.00019976	13	35.125	93336.6	3.32685	0.00200531
121.75		772.448	214.281	-0.00192991	0	53.625	93570.9	3.32685	0.00183312
238.042		772.448	212	-0.00135805	0	58.5938	93365.6	3.32685	0.00185322
171.875		772.448	198.312	-0.00100098	0	65.875	93583.4	3.39273	0.00145981
297.219		772.448	192.906	-0.00165822	0	75.625	93688.1	3.39273	0.00130019
223.556		772.448	215.062	0.00182698	0	76.3438	93368.8	3.39273	0.00165478
186.725		772.448	218.719	0.000560352	0	87.375	93375.9	3.39273	0.00167187
131.347		772.448	213.5	0.00329403	0	102.156	93399.1	3.3464	0.00182887
49.6875		772.448	225.531	-0.00710755	0	100.969	93393.1	3.3464	0.00221563
102.239		772.448	233.688	0.00383475	4.5	122.562	93370	4.05721	0.00254284
103.317		772.448	232.219	0.0117873	0.125	119.656	92763.4	4.05721	0.00287859
59.6271	0.1965	772.448	267.469	0.0623184	8.25	41.9688	92976.2	4.05721	0.00379872
39.4583	0.1665	772.448	297.562	0.0841497	15.375	45.125	92649.1	4.05721	0.00563581
19.9792	0.168167	772.448	302.688	0.1107	28.5	48.125	92725.9	4.6478	0.00622909
17.1083	0.068	772.448	278.969	0.151159	36.875	55.1875	92763.4	4.6478	0.00437691
17.125	0.0946	772.448	289.281	0.188769	114.375	63.0625	92669.1	4.6478	0.00389181
17.4251	0.204	772.448	311.125	0.11354	37.125	53.125	92475.6	4.6478	0.00557466
16.4375	0.163	772.448	313.688	0.292867	13.25	54.375	92513.8	5.26934	0.00628109
16.5652	0.130833	772.448	307.094	0.293067	13.625	58.1562	92577.2	5.26934	0.00570347
15.4581	0.142417	772.448	284.75	0.216223	77	75.0312	92635	5.26934	0.00416725
16.8681	0.2318	772.448	335.875	0.280999	119.75	62.6875	92214.4	5.26934	0.00690206
17.1931	0.138021	772.448	352.688	0.242237	260.25	70.3438	92232.8	4.47111	0.00722372
19.0713	0.124875	772.448	359.969	0.271636	260	59.25	92092.8	4.47111	0.0095215
16.1369	0.192976	772.448	344.406	0.268595	208.75	62.75	92350.9	4.47111	0.00905725
14.119	0.182472	772.448	359.906	0.29998	237	64.4375	91758.4	4.47111	0.0104955
14.4413	0.160722	772.448	351.281	0.252712	217.125	66.2188	92072.2	4.11778	0.00834631
14.5658	0.133567	772.448	366.5	0.309695	242.375	62.25	91847.8	4.11778	0.0107995
14.2976	0.21675	772.448	375.031	0.223206	257.75	56.6875	92027.2	4.11778	0.0110777
24.2064	0.245	772.448	371.5	0.234288	239.875	49.1875	92283.4	4.11778	0.0111634
21.5104	0.19	772.448	360.031	0.140361	252.25	56.4062	92138.1	3.82787	0.0101881
19.6046	0.24625	772.448	358.844	0.207829	261.25	55.2188	92364.7	3.82787	0.0102352
30.3533	0.141875	772.448	345.594	0.267995	327.25	53.5312	92485	3.82787	0.00806194
27.8417	0.117111	772.448	327.5	0.239024	401.375	55.1875	92404.7	3.75549	0.00619884
22.9291	0.125381	772.448	333.438	0.265399	466.375	48.625	92550.9	3.75549	0.00771087
23.9236	0.159861	772.448	333.219	0.194226	521	47.4062	92565.3	3.75549	0.00774006
23.0719	0.162167	772.448	318.125	0.187619	502.5	37.875	92701.6	3.75549	0.00658753
17.9249	0.2399	772.448	267.875	0.149255	483.75	40.7812	93268.8	3.77912	0.00437459
59.4	0.261111	772.448	279.781	0.0168576	459.375	35.3438	92714.1	3.77912	0.00428816
35.3646	0.397	772.448	255.188	0.14722	426	27.1562	93534.4	3.77912	0.00339872
57.2222	0.253528	772.448	239.094	0.0906152	396	33.5	93433.4	3.77912	0.00238738
39.9583	0.1535	772.448	246.469	0.0315197	367.5	26.875	93470.9	3.75538	0.00275991
42.5312	0.204	772.448	233.125	0.0123858	332.5	30.5	93006.9	3.75538	0.00275853
60.225		772.448	204.094	0.0231758	313.375	49.1875	94149.7	3.75538	0.00151491
137.067		772.448	221.875	0.0048032	291.25	52.4062	93543.1	3.75538	0.002584
77.125		772.448	240.969	0.00630686	247.25	48.3125	93083.1	3.48665	0.00268841
101.688		772.448	227	-0.00209223	181.5	35.125	93336.6	3.48665	0.00200531
162.498		772.448	214.281	0.00524081	133.875	53.625	93570.9	3.48665	0.00183312
191.915		772.448	212	0.00458717	90.875	58.5938	93365.6	3.48665	0.00185322
219.031		772.448	198.312	0.0055497	45	65.875	93583.4	3.57852	0.00145981
253.896		772.448	192.906	0.00212213	10.625	75.625	93688.1	3.57852	0.00130019
171.03		772.448	215.062	0.00601612	0	76.3438	93368.8	3.57852	0.00165478
174.292		772.448	218.719	-0.00145482	0	87.375	93375.9	3.57852	0.00167187
181.094		772.448	213.5	0.00288526	0	102.156	93399.1	3.44023	0.00182887
142.438		772.448	225.531	0.00277518	0	100.969	93393.1	3.44023	0.00221563
35.7702		763.744	233.938	0.00400004	0	128.438	93197.2	3.91215	0.00230956
135.581		763.744	233.094	0.00970177	0	127.219	92598.1	3.91215	0.00266656
102.37	0.354	763.744	268.688	0.0687497	6	41.1562	92804.7	3.91215	0.00385634
61.3527	0.175333	763.744	300.5	0.0776829	12	42.1875	92476.2	3.91215	0.00570406
37.5833	0.2044	763.744	306.062	0.156676	26.5	46.2812	92561.2	4.71492	0.00634619
23.3889	0.1425	763.744	281.719	0.119508	42.875	53.1875	92580.6	4.71492	0.00459803
29.0275	0.114767	763.744	292.188	0.191065	140.5	61.4375	92485.3	4.71492	0.00399372
27.2899	0.178333	763.744	315.188	0.191942	103	49.4062	92304.4	4.71492	0.00586512
24.3333	0.1285	763.744	319.906	0.233951	45.125	48.75	92345.3	5.12734	0.00662263
44.5	0.2065	763.744	311.156	0.255734	35	56.0312	92398.8	5.12734	0.00598837
21.9167	0.146875	763.744	288.594	0.297943	88	72.8438	92456.6	5.12734	0.00451837
14.4	0.192333	763.744	338.406	0.200867	149.75	61.5	92042.8	5.12734	0.00719634
16.0139	0.154417	763.744	355.594	0.338482	280.75	68.75	92054.1	4.48595	0.00755556
24.5	0.1824	763.744	364.531	0.294652	248.875	55.7812	91923.4	4.48595	0.00989706
18.05	0.178262	763.744	346.375	0.378016	132.75	60.875	92185	4.48595	0.00942691
22.369	0.175083	763.744	361.688	0.283281	169.875	63.1875	91598.4	4.48595	0.0109769
18.625	0.153222	763.744	353.25	0.360519	169	65.125	91899.7	4.20545	0.0086055
22.8163	0.1353	763.744	368.125	0.349508	216	61.0312	91685.6	4.20545	0.0110811
21.0639	0.236833	763.744	376.719	0.355324	230.5	56.875	91861.9	4.20545	0.011339
21.3991	0.233056	763.744	371.531	0.362636	215.75	50.5	92136.2	4.20545	0.0112189
23.1489	0.156625	763.744	363.375	0.243919	243.25	55.375	91977.8	3.90225	0.0104603
17.4127	0.234	763.744	361.25	0.248802	265.875	52.5	92216.9	3.90225	0.01044
26.5628	0.166958	763.744	349.125	0.293208	335.75	50.75	92324.7	3.90225	0.00848384
22.849	0.128458	763.744	331.125	0.33912	419.25	53.4062	92233.1	3.93769	0.00651466
23.8125	0.117889	763.744	337.406	0.272816	481.25	46.4688	92381.9	3.93769	0.008108
30.4692	0.157333	763.744	339.094	0.241465	515	45.4062	92392.5	3.93769	0.00796969
49.75	0.171805	763.744	321.25	0.230901	482.75	36.125	92534.4	3.93769	0.00689619
31.9173	0.224767	763.744	271.469	0.268074	461	39.4375	93091.6	3.75997	0.00451331
57.4783	0.292972	763.744	281	0.0652949	431.375	33.8438	92551.6	3.75997	0.00439512
52.5833	0.352	763.744	261.656	0.0971085	330.375	25.75	93379.7	3.75997	0.00347781
86.6667	0.2715	763.744	240.406	0.141442	167.5	32.7188	93255	3.75997	0.00257891
48.1458	0.136833	763.744	247.594	0.109206	121.75	28	93293.4	3.60247	0.00292144
69.3362	0.183	763.744	239.75	0.018788	84.125	30.375	92854.4	3.60247	0.00282672
135.604		763.744	205.625	0.0131122	48.875	49.4688	93998.1	3.60247	0.00154344
255.479		763.744	222.344	0.0204565	14.25	53.2812	93371.6	3.60247	0.00255988
99.875		763.744	244.406	0.0156999	0	47.2812	92930.6	3.13269	0.002645
127.803		763.744	228.875	0.00350486	0	34.5	93176.6	3.13269	0.0019685
159.317		763.744	215.406	0.00727944	0	53	93403.8	3.13269	0.00170988
230.754		763.744	213.688	0.00494645	0	57.6875	93195.6	3.13269	0.00176369
208.89		763.744	197.875	0.0107984	0	66.375	93411.6	3.17852	0.00138622
198.014		763.744	193.281	0.00992829	0	75.6875	93518.1	3.17852	0.00119619
160.792		763.744	216.625	0.00927854	0	75.6562	93215.6	3.17852	0.00159969
111.708		763.744	220.062	0.0101137	0	86.8125	93227.2	3.17852	0.00164981
82.7083		763.744	215.875	0.00793569	0	102.25	93242.2	3.20089	0.00172341
		763.744	225.5	0.00978611	0	104.875	93232.5	3.20089	0.00205472
101.627		772.448	233.688	-0.00389492	0	122.562	93370	4.26862	0.00254284
104.079		772.448	232.219	-0.00892833	0	119.656	92763.4	4.26862	0.00287859
65.7347	0.246	772.448	267.469	0.0258307	3.75	41.9688	92976.2	4.26862	0.00379872
31.587	0.1125	772.448	297.562	0.0728499	7.875	45.125	92649.1	4.26862	0.00563581
21.8917	0.1865	772.448	302.688	0.108685	9.375	48.125	92725.9	4.81723	0.00622909
28.7917	0.132875	772.448	278.969	0.126428	8.125	55.1875	92763.4	4.81723	0.00437691
32.7663	0.129375	772.448	289.281	0.21229	42.375	63.0625	92669.1	4.81723	0.00389181
24.0249	0.128333	772.448	311.125	0.186784	4.375	53.125	92475.6	4.81723	0.00557466
35.3707	0.193	772.448	313.688	0.183948	2.5	54.375	92513.8	5.28267	0.00628109
27.0833	0.176875	772.448	307.094	0.21825	1.375	58.1562	92577.2	5.28267	0.00570347
17.9751	0.133979	772.448	284.75	0.314072	13.5	75.0312	92635	5.28267	0.00416725
18.3125	0.1894	772.448	335.875	0.218234	20.375	62.6875	92214.4	5.28267	0.00690206
	0.125198	772.448	352.688	0.297897	88	70.3438	92232.8	4.60194	0.00722372
28.0694	0.118875	772.448	359.969	0.28355	49.125	59.25	92092.8	4.60194	0.0095215
11.5833	0.173857	772.448	344.406	0.323531	15.25	62.75	92350.9	4.60194	0.00905725
27.325	0.15031	772.448	359.906	0.235057	33.125	64.4375	91758.4	4.60194	0.0104955
21.905	0.141833	772.448	351.281	0.305219	28.375	66.2188	92072.2	4.36043	0.00834631
24.8988	0.120467	772.448	366.5	0.288068	37.75	62.25	91847.8	4.36043	0.0107995
30.505	0.212472	772.448	375.031	0.243212	30.875	56.6875	92027.2	4.36043	0.0110777
18.1361	0.235833	772.448	371.5	0.265407	8.125	49.1875	92283.4	4.36043	0.0111634
25.4583	0.185733	772.448	360.031	0.193727	19.625	56.4062	92138.1	4.02952	0.0101881
25.2083	0.227111	772.448	358.844	0.194006	16.25	55.2188	92364.7	4.02952	0.0102352
34.6335	0.13725	772.448	345.594	0.238121	61.125	53.5312	92485	4.02952	0.00806194
31.9271	0.110357	772.448	327.5	0.182719	129.25	55.1875	92404.7	4.08736	0.00619884
21.3333	0.122333	772.448	333.438	0.234512	191.125	48.625	92550.9	4.08736	0.00771087
	0.159214	772.448	333.219	0.194825	238.125	47.4062	92565.3	4.08736	0.00774006
24.3333	0.185033	772.448	318.125	0.174513	193.625	37.875	92701.6	4.08736	0.00658753
26.3333	0.254555	772.448	267.875	0.158836	164.125	40.7812	93268.8	3.91199	0.00437459
44.6458	0.3104	772.448	279.781	0.0551981	128.25	35.3438	92714.1	3.91199	0.00428816
24.7292		772.448	255.188	0.0966357	77.125	27.1562	93534.4	3.91199	0.00339872
26.7659	0.2647	772.448	239.094	0.0876968	20	33.5	93433.4	3.91199	0.00238738
44.6875	0.250208	772.448	246.469	0.0753787	0	26.875	93470.9	3.79586	0.00275991
39.0166	0.176	772.448	233.125	0.0570887	0	30.5	93006.9	3.79586	0.00275853
37.1562		772.448	204.094	0.00889707	0	49.1875	94149.7	3.79586	0.00151491
124.417		772.448	221.875	0.0055324	0	52.4062	93543.1	3.79586	0.002584
78.5625		772.448	240.969	0.00548938	0	48.3125	93083.1	3.44266	0.00268841
99.0779		772.448	227	0.0011689	0	35.125	93336.6	3.44266	0.00200531
34.6667		772.448	214.281	-0.00564262	0	53.625	93570.9	3.44266	0.00183312
91.1053		772.448	212	-0.00197716	0	58.5938	93365.6	3.44266	0.00185322
225.319		772.448	198.312	0.000770904	0	65.875	93583.4	3.5362	0.00145981
293.556		772.448	192.906	0.00192892	0	75.625	93688.1	3.5362	0.00130019
238.5		772.448	215.062	-0.00718671	0	76.3438	93368.8	3.5362	0.00165478
271.717		772.448	218.719	0.0030825	0	87.375	93375.9	3.5362	0.00167187
202.115		772.448	213.5	-0.0031953	0	102.156	93399.1	3.36044	0.00182887
183.333		772.448	225.531	-0.00723417	0	100.969	93393.1	3.36044	0.00221563
15.6084		426.848	232.812	0.0293519	0	150.094	97558.4	5.94777	0.00218934
13.5895		426.848	242.688	0.0962152	0	47.7812	96913.4	5.94777	0.00244078
12.8046	0.148333	426.848	285.5	0.0337478	3.25	44.125	96961.2	5.94777	0.00472866
10.8634	0.14125	426.848	313.625	0.0761885	5.375	38.6875	96550	5.94777	0.00573153
11.1458	0.0859666	426.848	306.312	0.0938259	47.875	51.6875	96576.6	6.65325	0.00551953
10.8125	0.0919	426.848	291.312	0.129853	122.75	56.6875	96596.6	6.65325	0.00396444
10.4123	0.122333	426.848	307.062	0.229463	227.125	63.1562	96373.8	6.65325	0.00481894
11.1975	0.1745	426.848	327.562	0.139031	129.125	44.75	96264.7	6.65325	0.00596534
10.5301	0.0948333	426.848	336.094	0.229214	58.375	42.3438	96299.4	6.30483	0.00710647
12.7871	0.131125	426.848	318.219	0.347206	32.125	57.2188	96351.9	6.30483	0.00606803
9.89715	0.129429	426.848	305.188	0.258419	196.25	73.75	96399.7	6.30483	0.00461838
11.5208	0.19725	426.848	354.625	0.385276	263.25	64.875	95833.8	6.30483	0.00736625
12.3531	0.126667	426.848	377.844	0.202419	301.625	72.3125	95796.9	6.20567	0.00810259
12.3417	0.173056	426.848	379.781	0.250124	351	56.8438	95663.4	6.20567	0.00862022
10.6667	0.131167	426.848	368.094	0.378684	304.375	65.0625	95968.8	6.20567	0.00858747
11.4583	0.116361	426.848	389.125	0.252816	299.75	69.8438	95344.1	6.20567	0.00944216
12.9376	0.126375	426.848	381.562	0.166637	309.625	69.5312	95591.2	5.30649	0.00835487
10.0227	0.150167	426.848	390.688	0.271612	262.125	61.0625	95393.1	5.30649	0.00861844
11.4333	0.1833	426.848	401.688	0.285269	245.125	59.875	95605	5.30649	0.0101057
11.518	0.188667	426.848	387.688	0.261596	254.125	55.8125	95921.9	5.30649	0.0096975
9.54801	0.0970417	426.848	369.469	0.281641	346.75	63.5312	95780.9	5.43505	0.00838716
11.4715	0.181667	426.848	373.969	0.316857	441.375	49.5938	96044.1	5.43505	0.00711516
13.7202	0.177958	426.848	363.031	0.242451	500.75	56.9062	96099.4	5.43505	0.00640344
12.0625	0.0906	426.848	348.844	0.257347	542.75	56.9688	96038.4	5.46225	0.00590291
12.2629	0.15635	426.848	358.531	0.275159	573.75	44.3438	96240.3	5.46225	0.00837006
14.6069	0.15669	426.848	355.031	0.17674	556.625	41.5	96274.4	5.46225	0.00778409
14.6979	0.143833	426.848	338.969	0.33158	446.75	31.0625	96520.9	5.46225	0.00765847
15.6954	0.155	426.848	297.25	0.108496	441.375	37.9062	97193.1	5.95203	0.00513934
27.0139	0.213	426.848	298.844	0.0554826	389.875	25.5625	96650.9	5.95203	0.00499413
23.6333	0.2175	426.848	276.625	0.10241	358.875	27.1562	97608.4	5.95203	0.00309312
42.3234	0.325	426.848	252.5	0.0298999	86.875	28.9062	97530	5.95203	0.00311284
28.8988	0.117722	426.848	265.719	0.0211949	0	22.9062	97462.8	5.78327	0.0032
20.9418	0.109	426.848	268.812	0.0190699	0	39	97230	5.78327	0.00271103
35.9583		426.848	200.906	0.00270238	0	70.1875	98476.2	5.78327	0.00118991
70.9329		426.848	223.906	-0.00728699	0	64.4375	97714.1	5.78327	0.00169091
30.3304		426.848	261.594	0.00727871	0	49.5625	97255.3	4.84519	0.00260222
39.8618		426.848	239.031	0.00246159	0	52.25	97545.9	4.84519	0.00196244
33.9609		426.848	222.562	0.0134174	0	60.625	97813.1	4.84519	0.00139891
76.8984		426.848	223.406	0.00985461	0	62.6875	97567.8	4.84519	0.00149741
91.3841		426.848	205.562	0.00815718	0	70.875	97849.1	4.73843	0.00101134
106.292		426.848	188.656	0.0132042	0	83.0938	98025.3	4.73843	0.000832844
101.395		426.848	211.562	0.0149357	0	88.9688	97663.1	4.73843	0.00141553
101.732		426.848	216.375	0.00515796	0	97.25	97669.7	4.73843	0.001441
82.2857		426.848	217.844	0.0296552	0	110.844	97655	5.42126	0.00140641
48.4531		426.848	222.75	0.0127046	0	120.875	97604.4	5.42126	0.00162047
24.6363		426.848	220.562	0.042974	0	150.094	97558.4	6.27884	0.00218934
31.0368		426.848	231.375	0.122534	0	47.7812	96913.4	6.27884	0.00244078
15.4601	0.0866667	426.848	268.031	0.0397583	3.125	44.125	96961.2	6.27884	0.00472866
10.2126	0.127083	426.848	284.281	0.114026	5	38.6875	96550	6.27884	0.00573153
8.86111	0.0805	426.848	281.438	0.111031	49	51.6875	96576.6	6.77859	0.00551953
8.20833	0.0867362	426.848	250	0.16327	124.5	56.6875	96596.6	6.77859	0.00396444
10.1775	0.101167	426.848	270.438	0.282436	228.875	63.1562	96373.8	6.77859	0.00481894
9.38763	0.2055	426.848	290.719	0.171247	139.75	44.75	96264.7	6.77859	0.00596534
7.78986	0.1005	426.848	298.812	0.246264	66.625	42.3438	96299.4	6.27903	0.00710647
8.69565	0.143333	426.848	281.188	0.37676	33.25	57.2188	96351.9	6.27903	0.00606803
	0.1255	426.848	268.938	0.302752	182.25	73.75	96399.7	6.27903	0.00461838
8.94444	0.12425	426.848	312.875	0.383211	251.625	64.875	95833.8	6.27903	0.00736625
8.71944	0.111333	426.848	320.531	0.367413	285	72.3125	95796.9	6.16276	0.00810259
13.3958	0.15575	426.848	333.219	0.178952	326.625	56.8438	95663.4	6.16276	0.00862022
6	0.11825	426.848	327.562	0.428164	276.375	65.0625	95968.8	6.16276	0.00858747
10.0556	0.08075	426.848	349.344	0.36166	279.25	69.8438	95344.1	6.16276	0.00944216
7.125	0.1575	426.848	328.062	0.283126	291.875	69.5312	95591.2	5.30317	0.00835487
11.3512	0.121375	426.848	345.438	0.288746	247.625	61.0625	95393.1	5.30317	0.00861844
11.0833	0.153933	426.848	358.344	0.272989	231.25	59.875	95605	5.30317	0.0101057
10.054	0.195083	426.848	345.625	0.362475	234.625	55.8125	95921.9	5.30317	0.0096975
6.29167	0.0779167	426.848	313.906	0.314856	326	63.5312	95780.9	5.4837	0.00838716
10.5417	0.11325	426.848	327.875	0.407441	428	49.5938	96044.1	5.4837	0.00711516
13.5583	0.11531	426.848	316.906	0.317886	492.875	56.9062	96099.4	5.4837	0.00640344
11.6389	0.116375	426.848	307.656	0.353258	534.625	56.9688	96038.4	5.64977	0.00590291
14	0.0769583	426.848	314.812	0.383695	567.25	44.3438	96240.3	5.64977	0.00837006
14.0993	0.146214	426.848	309.25	0.210591	548.875	41.5	96274.4	5.64977	0.00778409
15.519	0.127875	426.848	304.656	0.386103	430	31.0625	96520.9	5.64977	0.00765847
11.9994	0.150357	426.848	268.281	0.13704	424.75	37.9062	97193.1	6.15761	0.00513934
22.3234	0.189667	426.848	285.406	0.133292	391	25.5625	96650.9	6.15761	0.00499413
17.2292	0.2145	426.848	262.062	0.0668081	362	27.1562	97608.4	6.15761	0.00309312
39.131	0.385333	426.848	246.844	0.111508	87.375	28.9062	97530	6.15761	0.00311284
26.2887	0.108389	426.848	244.156	0.0269766	0	22.9062	97462.8	6.02095	0.0032
19.321	0.337	426.848	248.562	0.0369352	0	39	97230	6.02095	0.00271103
55.9583		426.848	189.656	0.020033	0	70.1875	98476.2	6.02095	0.00118991
74.5893		426.848	220.875	0.000896008	0	64.4375	97714.1	6.02095	0.00169091
33.6071		426.848	255.188	-0.000160372	0	49.5625	97255.3	5.31169	0.00260222
43.9446		426.848	244.438	0.0199837	0	52.25	97545.9	5.31169	0.00196244
38.6897		426.848	221.562	0.0137509	0	60.625	97813.1	5.31169	0.00139891
87.2641		426.848	214.938	0.0277674	0	62.6875	97567.8	5.31169	0.00149741
99.796		426.848	193.969	0.0318178	0	70.875	97849.1	5.36702	0.00101134
122.203		426.848	195.75	0.0268684	0	83.0938	98025.3	5.36702	0.000832844
112.601		426.848	200.812	0.0201661	0	88.9688	97663.1	5.36702	0.00141553
89.0347		426.848	210.438	0.0183679	0	97.25	97669.7	5.36702	0.001441
58.8073		426.848	235.094	0.031465	0	110.844	97655	5.94843	0.00140641
28.0833		426.848	210.594	0.0379991	0	120.875	97604.4	5.94843	0.00162047
33.2647	0.14	1547.74	240.062	0.0493276	0	142.344	84930.6	5.50621	0.00218206
38.3609	0.1985	1547.74	241.062	0.0338162	0	130.594	84417.2	5.50621	0.00250806
26.7661	0.123875	1547.74	288.969	0.0459826	2.875	92.9375	84756.9	5.50621	0.00403563
23.9281	0.128333	1547.74	323.312	0.0389067	2.875	38.4688	84600.6	5.50621	0.00525047
22.8869	0.0774334	1547.74	317.031	0.0610939	26.625	44.9062	84663.8	6.64754	0.00505966
20.2917	0.0975833	1547.74	304.75	0.1237	71.625	59.375	84650.9	6.64754	0.00381069
18.5625	0.1481	1547.74	316.625	0.0588128	160.875	64.1875	84679.7	6.64754	0.00500806
22.9443	0.178	1547.74	337.656	0.0726272	40.875	46.0938	84450.3	6.64754	0.00569175
15.7381	0.127	1547.74	345.062	0.135436	9.625	44.7188	84490.6	6.29955	0.0059105
13.385	0.162	1547.74	325.625	0.173303	14.5	57.0312	84582.2	6.29955	0.00555459
7.38578	0.146437	1547.74	312.969	0.119483	114.875	75.7812	84666.9	6.29955	0.00483747
7.97917	0.1845	1547.74	364.75	0.132407	135.875	63.4375	84375.9	6.29955	0.00743741
6.90238	0.111833	1547.74	390.156	0.0360266	178.75	76.625	84526.2	5.92615	0.00846375
7.25249	0.2365	1547.74	389.969	0.15604	197.375	52.4375	84314.7	5.92615	0.00843259
5.90278	0.147933	1547.74	375.594	0.187652	56.625	57.8125	84497.8	5.92615	0.00817181
6.30357	0.120833	1547.74	397.875	0.186997	9.75	52.8125	84071.6	5.92615	0.00928216
8.20531	0.107	1547.74	389.812	0.127306	49.75	67	84329.4	4.90595	0.00829844
7.80952	0.138	1547.74	397.344	0.140985	40.25	51.5625	84117.2	4.90595	0.00913806
8.46333	0.1695	1547.74	408.156	0.248068	19.5	48.8125	84343.1	4.90595	0.0102766
5.60281	0.193458	1547.74	394.781	0.154286	32.25	48.0312	84545	4.90595	0.00898531
5.57563	0.099125	1547.74	381.344	0.218154	132.625	68.3125	84414.7	5.20604	0.00783375
5.04801	0.159	1547.74	384.781	0.158967	243.875	42.875	84586.6	5.20604	0.00670303
5.90399	0.1055	1547.74	373.938	0.170099	334.875	57.7188	84705.6	5.20604	0.00676266
5.5625	0.13475	1547.74	356.062	0.147487	393.375	59.2812	84592.5	5.17851	0.00594441
6.14156	0.113917	1547.74	366.812	0.0805995	442.375	41.6875	84735	5.17851	0.00802891
5.125	0.127333	1547.74	365.219	0.127394	444.625	40	84743.8	5.17851	0.00723044
	0.139667	1547.74	345.344	0.0631605	309.625	31.2812	84744.4	5.17851	0.00663022
10.1167	0.123333	1547.74	304.156	0.040379	298.5	40.5938	85066.6	5.35266	0.00444306
14.6458	0.216667	1547.74	301.375	0.0525107	183.625	25.7188	84613.1	5.35266	0.00457491
12.5424	0.136	1547.74	283.688	0.0765227	121.25	41.2812	85135.3	5.35266	0.00273872
13.5198	0.29475	1547.74	253.938	0.00659784	19.625	35.6562	85088.8	5.35266	0.00331453
17.9375	0.116833	1547.74	271.906	0.00294296	0	30.375	85067.2	5.62567	0.00275966
9.00483	0.205	1547.74	273.188	0.0095767	0	63.9062	84598.4	5.62567	0.00228838
49.9333		1547.74	202.219	-0.00199098	0	76.25	85438.8	5.62567	0.000965844
58.6751		1547.74	227.031	-0.00341099	0	70.3438	85101.6	5.62567	0.0017975
22.1339		1547.74	268.031	-0.00231964	0	46.9062	84693.8	4.17485	0.00260231
34.4612		1547.74	237.75	-0.00780859	0	46.625	84872.2	4.17485	0.00207028
27.9499		1547.74	218.812	-0.0053161	0	58.125	84971.6	4.17485	0.0015905
68.3488		1547.74	224.25	-0.00778478	0	61.4688	84816.9	4.17485	0.00161884
88.6107		1547.74	208.719	-0.00731763	0	69.7188	84928.1	3.43594	0.00108419
111.625		1547.74	190.844	0.00357868	0	77.6875	85037.5	3.43594	0.00104606
95.4369		1547.74	213.562	0.00479412	0	84.4062	84816.2	3.43594	0.00116369
76.9427		1547.74	217.781	0.013757	0	93.7188	84821.9	3.43594	0.00139131
53.7604		1547.74	217.594	0.0602245	0	98.0312	84897.5	4.54197	0.00187762
23.75		1547.74	222.062	0.0872287	0	121.781	84863.4	4.54197	0.00155178
140.736		245.728	235.156	-0.0162042	0	144.156	99880.9	2.98048	0.00215028
85.9479		245.728	239.062	-0.00988939	0	134.812	99202.8	2.98048	0.00232112
31.5062		245.728	290.469	0.0173083	0.25	41.375	99182.2	2.98048	0.00481719
29.0236	0.067	245.728	312.469	0.0507294	0.75	33.2188	98735.3	2.98048	0.00597484
23.4635	0.114125	245.728	304.094	0.101893	13.25	47.375	98754.7	3.68069	0.00583666
17.9375	0.0453055	245.728	279.219	0.124716	39.75	50.5	98780	3.68069	0.00428578
18.231	0.103292	245.728	308.281	0.235411	146.875	60.2812	98523.8	3.68069	0.00488575
18.1492	0.062	245.728	317.844	0.136748	70.375	41.7188	98430.9	3.68069	0.00648612
15.9124	0.257667	245.728	322.531	0.16831	6	38.75	98469.7	4.03559	0.00783297
13.0304	0.104556	245.728	316.312	0.274551	6.25	57.3438	98513.8	4.03559	0.00664594
14.0799	0.142687	245.728	305.906	0.382395	73.625	72.0625	98535.6	4.03559	0.00496394
13.1302	0.102583	245.728	361.156	0.299349	134.75	59.8125	97940.3	4.03559	0.00731316
19.4583	0.118702	245.728	377.5	0.325328	252.875	70.0625	97863.1	3.74712	0.00802134
17.2126	0.201875	245.728	379.344	0.200685	263.25	54.625	97753.8	3.74712	0.00880488
13.119	0.120042	245.728	370.906	0.296702	133.5	60.875	98071.2	3.74712	0.00856388
16	0.110433	245.728	388.125	0.282431	109.875	67.9375	97398.4	3.74712	0.00967494
13.6531	0.127889	245.728	382.688	0.319383	119.875	66.25	97665.3	3.46723	0.00836938
14.9938	0.0936667	245.728	388.656	0.226584	132.75	58.5625	97463.4	3.46723	0.00860803
18.7917	0.157133	245.728	396.688	0.317737	121.125	58.4375	97657.2	3.46723	0.0102041
19.1941	0.185067	245.728	395.031	0.345968	115.625	54.8125	98003.4	3.46723	0.0102666
17.8021	0.168024	245.728	366.438	0.249774	170.25	58.0312	97843.8	3.44694	0.00853113
19.6365	0.2365	245.728	362.688	0.281696	228.375	45.5312	98131.9	3.44694	0.00736938
22.952	0.158708	245.728	357.375	0.276905	316.625	54.875	98175.3	3.44694	0.00654531
21.224	0.128861	245.728	345.031	0.313849	403	54.1875	98125	3.2807	0.00605322
20.9672	0.124375	245.728	361.688	0.234933	462.5	42.5312	98330	3.2807	0.00830231
24.1771	0.1455	245.728	348.188	0.266841	494.625	41.0938	98373.1	3.2807	0.00787647
26.4436	0.201125	245.728	329.938	0.283657	400.75	31.9375	98670	3.2807	0.00808956
20.5693	0.170214	245.728	288.531	0.257948	383.75	36.5938	99405	3.03489	0.00541188
43.567	0.31825	245.728	297.125	0.0356453	350.625	27.2812	98842.5	3.03489	0.00519478
33.5019		245.728	263.719	0.00945703	316.125	23.0312	99890.9	3.03489	0.00345647
67.7188	0.32175	245.728	250.562	0.0868853	266.25	28.5312	99794.4	3.03489	0.00310494
39.2996	0.1315	245.728	264.688	0.0422602	225	21.375	99748.1	2.85932	0.00343381
39.1948	0.1405	245.728	257.094	0.00149876	170.875	30.0625	99535	2.85932	0.00296613
64.4097		245.728	195.719	0.011546	51.375	65.0938	100878	2.85932	0.00125938
174.72		245.728	220.719	0.00183628	0	61.0625	100033	2.85932	0.00171794
75.4385		245.728	274.594	-0.00317073	0	48.8125	99555.9	2.19961	0.00261056
51.9725		245.728	248.25	-0.00268169	0	54.5625	99874.4	2.19961	0.00181175
68.0755		245.728	220	0.000544065	0	61.8125	100178	2.19961	0.00131191
131.217		245.728	224.562	0.000658649	0	63.6875	99912.8	2.19961	0.00146441
93.7978		245.728	229.656	0.0123565	0	71.7812	100227	2.13087	0.00105153
105.109		245.728	210.969	0.00218911	0	83.9375	100419	2.13087	0.000763125
109.474		245.728	221.625	0.00485295	0	90.5312	100025	2.13087	0.00133884
68.7188		245.728	225.344	-0.000721668	0	97.9062	100032	2.13087	0.00135588
122.854		245.728	238.5	-0.00519349	0	112.781	100001	2.58976	0.00131466
81.6563		245.728	225.062	-0.00162291	0	124.688	99949.4	2.58976	0.00155741
14.5986		432.096	234.312	0.0170276	0	142.25	97677.2	5.04398	0.0020235
16.6992	0.0813333	432.096	242.469	0.140028	0	60.0312	97015.3	5.04398	0.00231509
12.7394	0.1745	432.096	268.219	0.0758507	2.5	42.6875	97047.8	5.04398	0.00456909
11.0779	0.09125	432.096	300.875	0.0779238	8.375	41.9375	96599.7	5.04398	0.00591575
9.99479	0.0919666	432.096	308.719	0.105974	42.75	55.0625	96610.3	4.91449	0.0053135
8.77083	0.08775	432.096	287.656	0.137982	123.125	66.25	96650	4.91449	0.00372872
10.2619	0.1325	432.096	290.656	0.207374	253.875	70.1875	96361.6	4.91449	0.00458153
9.36425	0.112389	432.096	309.938	0.105926	269.125	58.25	96288.1	4.91449	0.0052445
8.6589	0.163625	432.096	322.219	0.163253	200.375	63.2188	96323.8	5.34479	0.00620341
9.31522	0.180625	432.096	321.094	0.181947	155.375	65.0312	96346.2	5.34479	0.00521734
8.33316	0.156625	432.096	305.062	0.195263	281.5	80.2812	96424.7	5.34479	0.003688
9.05357	0.227	432.096	335.312	0.257066	357.25	71.5	95814.7	5.34479	0.00776006
8.79375	0.149	432.096	360.562	0.156024	411.5	81.625	95800	4.95528	0.00917347
9.52899	0.158875	432.096	364.969	0.323494	466.125	66.0312	95637.5	4.95528	0.00937709
7.28571	0.15475	432.096	343.469	0.190505	379.625	70.3438	95981.2	4.95528	0.00959212
7.90476	0.150067	432.096	364.312	0.287177	346.375	70.9688	95361.6	4.95528	0.010201
8.29167	0.15925	432.096	361.625	0.345297	361.875	75.1562	95600.6	4.13447	0.0107539
7.49087	0.149833	432.096	374.25	0.256464	355.125	66.9062	95378.1	4.13447	0.00977328
10.1736	0.2105	432.096	366.125	0.233015	320	64.4688	95621.2	4.13447	0.0116645
11.5547	0.181333	432.096	392.625	0.334653	353.125	58.5	95945.6	4.13447	0.0116638
11.858	0.120063	432.096	377.188	0.299048	440.25	71.9688	95837.8	4.12673	0.00966803
17.615	0.158667	432.096	375.375	0.284491	532.625	61.0625	96081.9	4.12673	0.00865747
19.4112	0.1295	432.096	360.688	0.396563	574.75	61.1875	96133.8	4.12673	0.00703038
16.7552	0.131208	432.096	347.969	0.320456	617.75	62.875	96080.3	4.25631	0.00664794
16.8214	0.132375	432.096	341.594	0.268147	642.5	47	96266.6	4.25631	0.00904503
16.8112	0.0968	432.096	330.531	0.342707	629.25	49.5	96325	4.25631	0.00886003
16.9236	0.15875	432.096	318.688	0.319142	459.5	36.3438	96549.1	4.25631	0.0072815
16.0285	0.15175	432.096	272.781	0.19609	432	37.9062	97249.1	4.8028	0.00489928
24.2319	0.262333	432.096	273.938	0.229666	295.125	26.6562	96724.7	4.8028	0.00481266
20.8611	0.1845	432.096	278.625	0.101635	241.5	29.4375	97651.9	4.8028	0.00289725
38.3333	0.2673	432.096	240.969	0.147705	57.875	31.6875	97657.5	4.8028	0.00286559
24	0.115333	432.096	237.562	0.150633	0	24.4062	97538.4	4.71897	0.00302469
17.875	0.074	432.096	234.688	0.0365287	0	40.4062	97364.7	4.71897	0.00231766
42.0625		432.096	237.906	0.0267673	0	68.2188	98601.2	4.71897	0.00107731
58.7382		432.096	218.875	0.027472	0	61.75	97815.6	4.71897	0.00160637
24.4762		432.096	235.875	0.00937345	0	43.125	97353.4	3.81911	0.00264322
30.971		432.096	216.812	0.00675436	0	43.625	97639.1	3.81911	0.00193744
23.0598		432.096	207.031	0.0236639	0	55.0625	97913.1	3.81911	0.00129259
58.6295		432.096	204.906	0.0179506	0	58.5625	97662.2	3.81911	0.00140034
		432.096	196.844	0.0155346	0	61.9375	97945.9	3.61648	0.00128466
97.7639		432.096	183.438	0.0235788	0	71.5312	98142.8	3.61648	0.000944094
92.279		432.096	233.281	0.0124266	0	81.5	97766.2	3.61648	0.00131663
81.1548		432.096	230.625	0.0162015	0	88.1562	97766.9	3.61648	0.00134997
51.1786		432.096	222.438	0.0188314	0	99.4062	97746.9	3.94131	0.00162575
24.6667		432.096	244.812	-0.00171725	0	117.531	97687.2	3.94131	0.00160775
165.89	0.24075	905.056	234.312	0.0393251	313.25	32.5312	91072.8	4.05416	0.00196959
132.05	0.54875	905.056	242.469	0.0235549	299.25	33.1562	90687.5	4.05416	0.00181488
79.0968	0.229	905.056	268.219	0.0459754	285.875	32	90665.6	4.05416	0.00222688
67.8807	0.118	905.056	300.875	0.0541393	276.375	30.6562	90479.4	4.05416	0.00402966
38.275	0.0745	905.056	308.719	0.0993141	272.25	34.875	90410	4.8866	0.00437069
74.4722	0.105778	905.056	287.656	0.101765	238.375	36.5625	90595.6	4.8866	0.00391644
54.0199	0.0992	905.056	290.656	0.203148	294.75	46.7188	90414.7	4.8866	0.00293888
131.924	0.799333	905.056	309.938	0.0823743	311.5	42.5625	90209.1	4.8866	0.00340137
54.4333	0.142	905.056	322.219	0.114063	331	40.4688	90215.3	5.1711	0.00472109
67.0356	0.157	905.056	321.094	0.164179	351.625	43.5	90319.4	5.1711	0.003735
69.7309	0.231111	905.056	305.062	0.149065	369.875	50.9688	90473.4	5.1711	0.0030625
35.9083	0.174	905.056	335.312	0.170625	367.75	45.0938	90047.5	5.1711	0.00553472
35.5069	0.154048	905.056	360.562	0.21432	421.75	48.5938	90042.2	4.72694	0.00593787
23.4312	0.173095	905.056	364.969	0.196787	461.5	48.9062	89741.9	4.72694	0.00604303
43.85	0.1395	905.056	343.469	0.203358	460.375	47	90053.1	4.72694	0.00536419
31.1146	0.244417	905.056	364.312	0.129654	473.375	53.4062	89422.5	4.72694	0.00529275
19.0833	0.133875	905.056	361.625	0.187444	434.5	47.1875	89891.9	4.0106	0.00704081
44.3601	0.179033	905.056	374.25	0.209671	460.875	44.9688	89625.3	4.0106	0.00671922
33.3611	0.177667	905.056	366.125	0.197997	513.875	50.5625	89742.5	4.0106	0.00608063
57.088	0.37725	905.056	392.625	0.214961	502	36.6562	89815.3	4.0106	0.00888653
26.9547	0.201	905.056	377.188	0.0897002	441.625	41.0312	89960.9	3.42271	0.008288
25.9028	0.245	905.056	375.375	0.100678	391.625	33.1562	90133.4	3.42271	0.00981784
28.0104	0.187555	905.056	360.688	0.180662	375.5	38.0625	90402.8	3.42271	0.00778278
33.901	0.1246	905.056	347.969	0.217338	386.625	37	90330.3	3.85884	0.00676044
32.2609	0.175306	905.056	341.594	0.225142	422.5	35.9688	90421.9	3.85884	0.00590062
32.1137	0.140071	905.056	330.531	0.217675	405.125	36.4062	90439.4	3.85884	0.00508206
26.85	0.134472	905.056	318.688	0.196013	405.75	32.75	90508.8	3.85884	0.00509459
35.7192	0.156972	905.056	272.781	0.212779	418.875	30.8125	91150.3	3.72203	0.00391828
64.3529	0.198146	905.056	273.938	0.0422037	423.375	29.75	90623.8	3.72203	0.00320303
35.4652	0.34525	905.056	278.625	0.150774	415.25	15.1875	91014.1	3.72203	0.00264459
60.2874	0.239063	905.056	240.969	0.119493	411.75	24.1562	91626.2	3.72203	0.00266838
55.5766	0.137583	905.056	237.562	0.139936	407.875	20.4062	91453.1	3.07976	0.00236097
53.901	0.151214	905.056	234.688	0.0203215	396.5	19.6562	90780	3.07976	0.00211934
44.2321	0.226	905.056	237.906	0.0515691	383	13.8125	91773.8	3.07976	0.00170728
91.215	0.216083	905.056	218.875	0.0412603	373	16.4062	91795	3.07976	0.00189313
66.8234	0.205125	905.056	235.875	0.0475626	361.5	14.1562	91048.8	2.37165	0.00241631
87.7853	0.211	905.056	216.812	0.0174062	346.125	14.5	91420.6	2.37165	0.00191378
66.5221		905.056	207.031	0.0292282	324.875	13.75	91658.4	2.37165	0.00134728
75.4549	0.21	905.056	204.906	0.0450222	296.75	15.3438	91411.9	2.37165	0.00127569
46.6839	0.18325	905.056	196.844	0.0551847	265	16.5312	91721.6	2.45046	0.00141331
60.2083	0.188833	905.056	183.438	0.0346777	240.5	19.125	91856.9	2.45046	0.00101028
56.7451	0.1695	905.056	233.281	0.034342	215	16.625	91255.6	2.45046	0.00162381
70.6094	0.11675	905.056	230.625	0.0404292	202.5	18.9062	91111.6	2.45046	0.00191697
75.6354	0.192125	905.056	222.438	0.024935	195.375	23.4375	91382.2	3.07049	0.00197934
46.1369	0.082	905.056	244.812	0.0678531	192	23.5	91171.6	3.07049	0.00222334
191.73	0.274167	905.056	234.312	0.0494079	319.125	32.5312	91072.8	4.11085	0.00196959
157.199	0.430167	905.056	242.469	0.029902	305.375	33.1562	90687.5	4.11085	0.00181488
78.5559	0.290375	905.056	268.219	0.0389245	291.5	32	90665.6	4.11085	0.00222688
65.8003	0.113	905.056	300.875	0.0563607	278.375	30.6562	90479.4	4.11085	0.00402966
34.9583	0.0682	905.056	308.719	0.0704038	278.375	34.875	90410	4.97598	0.00437069
45.8083	0.152111	905.056	287.656	0.0968969	245	36.5625	90595.6	4.97598	0.00391644
52.3288	0.111533	905.056	290.656	0.156536	300.625	46.7188	90414.7	4.97598	0.00293888
117.583	0.822833	905.056	309.938	0.0918671	323.125	42.5625	90209.1	4.97598	0.00340137
48.1372	0.184375	905.056	322.219	0.100464	348.75	40.4688	90215.3	5.24092	0.00472109
42.524	0.203778	905.056	321.094	0.120893	362	43.5	90319.4	5.24092	0.003735
48.4074	0.273633	905.056	305.062	0.121427	376.375	50.9688	90473.4	5.24092	0.0030625
24.2708	0.219	905.056	335.312	0.112878	376.25	45.0938	90047.5	5.24092	0.00553472
38.1219	0.185262	905.056	360.562	0.213014	434	48.5938	90042.2	4.77728	0.00593787
25.7159	0.181167	905.056	364.969	0.162677	474.25	48.9062	89741.9	4.77728	0.00604303
40.7024	0.155967	905.056	343.469	0.15213	471.875	47	90053.1	4.77728	0.00536419
36.3929	0.266222	905.056	364.312	0.175225	494.375	53.4062	89422.5	4.77728	0.00529275
23.554	0.157125	905.056	361.625	0.163868	455.125	47.1875	89891.9	4.05265	0.00704081
40.4909	0.231917	905.056	374.25	0.142874	480.75	44.9688	89625.3	4.05265	0.00671922
36.5033	0.212405	905.056	366.125	0.187927	530.875	50.5625	89742.5	4.05265	0.00608063
60.7141	0.44075	905.056	392.625	0.136012	524.125	36.6562	89815.3	4.05265	0.00888653
25.8829	0.23775	905.056	377.188	0.132965	479.625	41.0312	89960.9	3.47441	0.008288
25.0965	0.2755	905.056	375.375	0.0654819	439.875	33.1562	90133.4	3.47441	0.00981784
27.185	0.1395	905.056	360.688	0.12715	421.5	38.0625	90402.8	3.47441	0.00778278
34.7321	0.1377	905.056	347.969	0.196378	427.25	37	90330.3	3.85009	0.00676044
29.6221	0.200286	905.056	341.594	0.152151	459.125	35.9688	90421.9	3.85009	0.00590062
41.3611	0.199042	905.056	330.531	0.220467	434.25	36.4062	90439.4	3.85009	0.00508206
27.713	0.169861	905.056	318.688	0.175522	430.125	32.75	90508.8	3.85009	0.00509459
31.8367	0.171119	905.056	272.781	0.190856	444	30.8125	91150.3	3.77012	0.00391828
51.4988	0.234104	905.056	273.938	0.0745839	450.875	29.75	90623.8	3.77012	0.00320303
38.0995	0.343	905.056	278.625	0.118484	445.25	15.1875	91014.1	3.77012	0.00264459
59.1957	0.27631	905.056	240.969	0.0969484	441.625	24.1562	91626.2	3.77012	0.00266838
49.8699	0.149133	905.056	237.562	0.128927	438	20.4062	91453.1	3.13904	0.00236097
49.9633	0.169917	905.056	234.688	0.0697727	427.625	19.6562	90780	3.13904	0.00211934
41.9427	0.221	905.056	237.906	0.0552649	414.5	13.8125	91773.8	3.13904	0.00170728
82.089	0.247967	905.056	218.875	0.0605751	404	16.4062	91795	3.13904	0.00189313
61.252	0.205125	905.056	235.875	0.037249	393	14.1562	91048.8	2.41651	0.00241631
78.5885	0.266333	905.056	216.812	0.0308319	378.375	14.5	91420.6	2.41651	0.00191378
71.8356		905.056	207.031	0.059655	358.875	13.75	91658.4	2.41651	0.00134728
69.0572		905.056	204.906	0.0264906	330	15.3438	91411.9	2.41651	0.00127569
38.1596		905.056	196.844	0.0536321	274.625	16.5312	91721.6	2.48748	0.00141331
50.6771		905.056	183.438	0.0573882	244.25	19.125	91856.9	2.48748	0.00101028
48.8936	0.163	905.056	233.281	0.0516842	221	16.625	91255.6	2.48748	0.00162381
58.9167	0.09075	905.056	230.625	0.0521939	209.875	18.9062	91111.6	2.48748	0.00191697
60.0208	0.16975	905.056	222.438	0.0471697	202.625	23.4375	91382.2	3.09738	0.00197934
44.3274	0.0868333	905.056	244.812	0.0351766	199	23.5	91171.6	3.09738	0.00222334
203.903	0.266	905.056	260.125	0.0537616	323.125	32.5312	91072.8	4.11085	0.00196959
187.068	0.5315	905.056	261.25	0.0336294	309.375	33.1562	90687.5	4.11085	0.00181488
78.3644	0.25875	905.056	303.656	0.0478177	295.25	32	90665.6	4.11085	0.00222688
67.6406	0.132	905.056	326.594	0.0627951	280.375	30.6562	90479.4	4.11085	0.00402966
34.8681	0.108	905.056	328.156	0.0811445	280.125	34.875	90410	4.97598	0.00437069
39.4583	0.149528	905.056	312.031	0.087144	246	36.5625	90595.6	4.97598	0.00391644
36.3302	0.119533	905.056	323.969	0.191578	301.25	46.7188	90414.7	4.97598	0.00293888
122.551	0.815833	905.056	338.062	0.0670018	324	42.5625	90209.1	4.97598	0.00340137
44.6437	0.169875	905.056	354.344	0.104012	352.125	40.4688	90215.3	5.24092	0.00472109
40.6528	0.159833	905.056	341.969	0.158113	366.25	43.5	90319.4	5.24092	0.003735
50.2577	0.234357	905.056	319.938	0.134754	382	50.9688	90473.4	5.24092	0.0030625
34.6979	0.205667	905.056	381.25	0.141549	385.875	45.0938	90047.5	5.24092	0.00553472
32.4708	0.177214	905.056	397.562	0.20598	443.625	48.5938	90042.2	4.77728	0.00593787
19.853	0.214881	905.056	405.188	0.144125	486.75	48.9062	89741.9	4.77728	0.00604303
27.869	0.123767	905.056	388.344	0.189638	484.375	47	90053.1	4.77728	0.00536419
33.3125	0.263278	905.056	403.281	0.175656	506.875	53.4062	89422.5	4.77728	0.00529275
15.2717	0.141167	905.056	404.031	0.158932	461.375	47.1875	89891.9	4.05265	0.00704081
26.9482	0.199267	905.056	417.031	0.198465	484.875	44.9688	89625.3	4.05265	0.00671922
26.6458	0.212071	905.056	420.156	0.195314	535.375	50.5625	89742.5	4.05265	0.00608063
	0.47725	905.056	442.062	0.194989	529.875	36.6562	89815.3	4.05265	0.00888653
	0.25	905.056	412.875	0.101589	482.875	41.0312	89960.9	3.47441	0.008288
18.5867	0.27425	905.056	416.812	0.116913	440.125	33.1562	90133.4	3.47441	0.00981784
20.3507	0.133667	905.056	397.594	0.138527	419.375	38.0625	90402.8	3.47441	0.00778278
25.4722	0.127733	905.056	371.406	0.232785	423.25	37	90330.3	3.85009	0.00676044
22.397	0.18319	905.056	375.062	0.242162	455.875	35.9688	90421.9	3.85009	0.00590062
27.4775	0.191042	905.056	377.344	0.232372	428.625	36.4062	90439.4	3.85009	0.00508206
19.0523	0.165139	905.056	349.656	0.236093	424.375	32.75	90508.8	3.85009	0.00509459
24.3932	0.17069	905.056	298.875	0.197093	438	30.8125	91150.3	3.77012	0.00391828
49.2171	0.238875	905.056	308.75	0.0603608	444.875	29.75	90623.8	3.77012	0.00320303
25.7716	0.2685	905.056	286.188	0.138701	439.25	15.1875	91014.1	3.77012	0.00264459
52.5469	0.275191	905.056	259.844	0.102311	435.625	24.1562	91626.2	3.77012	0.00266838
35.9375	0.1423	905.056	270.594	0.13922	432	20.4062	91453.1	3.13904	0.00236097
34.8336	0.16225	905.056	261.719	0.0629044	421.625	19.6562	90780	3.13904	0.00211934
24.15	0.21	905.056	246.156	0.0805466	409	13.8125	91773.8	3.13904	0.00170728
69.5315	0.227625	905.056	244.062	0.0644883	399	16.4062	91795	3.13904	0.00189313
51.1538	0.248	905.056	268.719	0.0582028	388	14.1562	91048.8	2.41651	0.00241631
63.8566	0.210333	905.056	246.094	0.0581147	373.375	14.5	91420.6	2.41651	0.00191378
63.172		905.056	231.062	0.0340051	355.125	13.75	91658.4	2.41651	0.00134728
60.7268		905.056	230.062	0.0523459	326.5	15.3438	91411.9	2.41651	0.00127569
28.0433		905.056	219.031	0.0763074	271.875	16.5312	91721.6	2.48748	0.00141331
38		905.056	218.031	0.0604096	242.25	19.125	91856.9	2.48748	0.00101028
40.3214		905.056	244.969	0.0690879	219	16.625	91255.6	2.48748	0.00162381
58.1845	0.13075	905.056	247.562	0.0780205	207.875	18.9062	91111.6	2.48748	0.00191697
57.3646	0.1275	905.056	243.469	0.054407	200.625	23.4375	91382.2	3.09738	0.00197934
42.0069	0.05825	905.056	261.438	0.078103	197	23.5	91171.6	3.09738	0.00222334
148.812	0.246333	-292	355.062	0.0714508	576.75	58.6875	105905	3.70056	0.00212584
77.7308	0.193	-292	356.312	0.0547851	574.875	63.1562	105452	3.70056	0.00173344
71.123	0.2812	-292	393.188	0.0627211	576.25	57.4375	105095	3.70056	0.00320675
54.2027	0.171	-292	413.062	0.0795871	586.125	64.6875	104772	3.70056	0.00472778
48.5417	0.1368	-292	425	0.119899	604.875	71.4688	104652	4.48715	0.00441663
30.6181	0.107167	-292	408.625	0.144486	631.5	74.125	104901	4.48715	0.00349862
53.3725	0.143972	-292	433.938	0.219286	677	83.2188	104513	4.48715	0.00337434
51.0591	0.2606	-292	434.594	0.223292	688.875	80.4375	104324	4.48715	0.00423184
106.604	0.13875	-292	444.219	0.175655	679.75	79.8438	104294	5.01924	0.00572963
92.6706	0.223567	-292	448.594	0.234191	678.75	85.3438	104406	5.01924	0.00401531
33.7808	0.153976	-292	438.094	0.206626	702.875	95.5938	104649	5.01924	0.003078
29.3958	0.144833	-292	477	0.223772	701	85.7812	103760	5.01924	0.00695053
22.0208	0.124	-292	497.719	0.184312	735.625	89.2812	103624	4.68465	0.00720175
26.8874	0.138167	-292	504.062	0.244712	729.125	89.9375	103402	4.68465	0.00810294
48.25	0.161917	-292	488	0.186909	740.125	88.9062	103779	4.68465	0.00736284
44.75	0.202083	-292	514.125	0.260625	741.375	91.2812	102910	4.68465	0.00773531
24.8983	0.125533	-292	500.875	0.183232	703.75	86.75	103469	4.36583	0.00834084
27.1319	0.137633	-292	510.969	0.237631	719	82.25	103126	4.36583	0.00932191
32.6667	0.225905	-292	518.844	0.215292	724.5	83.7188	103211	4.36583	0.00937006
77.4272	0.2245	-292	518.438	0.197224	675.125	68.5312	103191	4.36583	0.0104057
21.4026	0.18425	-292	499.062	0.169932	617.125	76.375	103512	4.82643	0.00915869
30.9574	0.2145	-292	487.281	0.144319	606.25	63.1562	103739	4.82643	0.0100129
29.5714	0.163167	-292	479.875	0.220934	637.375	70.7812	104084	4.82643	0.00859984
26.5417	0.200375	-292	468.344	0.234213	664.75	70.75	104096	3.54401	0.00705681
28.2473	0.1474	-292	472.344	0.219226	689.375	66.5625	104199	3.54401	0.00668453
30.3518	0.185857	-292	463	0.248344	706.5	61.7812	104238	3.54401	0.00755106
25.9028	0.1095	-292	434.969	0.150437	710.875	57.5938	104538	3.54401	0.00643594
41.2345	0.1083	-292	386.281	0.187385	715.25	53.0938	105627	3.90462	0.00435519
54.7122	0.203733	-292	396.781	0.149093	715.125	52.1875	104863	3.90462	0.00466566
67.8473	0.31775	-292	366.406	0.0733914	698.375	44.2812	105684	3.90462	0.00312469
65.8646	0.195286	-292	339.281	0.158607	696.375	45	106365	3.90462	0.00254341
58.0476	0.153238	-292	348.281	0.154242	694.125	38.2812	106109	3.42982	0.00266987
73.3481	0.155125	-292	334.219	0.0876432	686.5	35.3438	105557	3.42982	0.00265634
75.9653	0.230967	-292	316.688	0.100567	678.25	30.1875	106978	3.42982	0.00145391
111.813	0.238333	-292	318.75	0.0880193	636.5	31.625	106659	3.42982	0.00211594
175.833		-292	332.406	0.0224709	608.75	25.1875	105807	2.84551	0.00276531
134.174	0.217	-292	316.75	0.0505265	577.125	27.7188	106362	2.84551	0.00220638
93.7082	0.351667	-292	304.625	0.0490179	566	27.0312	106786	2.84551	0.00144825
112.326	0.348889	-292	301.906	0.0909346	528	29.1562	106526	2.84551	0.00155994
125.09	0.432667	-292	295	0.0602007	512.375	32.8438	106990	2.93721	0.00155062
117.905	0.334437	-292	294.188	0.0941023	499.5	35.5625	107110	2.93721	0.00144003
95.6667	0.234167	-292	312.875	0.0344384	486.875	31.6562	106391	2.93721	0.00174138
75.2656	0.229	-292	321.844	0.0576255	478	38.375	106175	2.93721	0.00177888
93.125	0.2095	-292	325.781	0.0617521	474	44.5312	106342	3.82638	0.00156619
90.8571	0.0641667	-292	343.531	0.0428223	481.5	44.875	106054	3.82638	0.001849
143.441	0.2965	-183.456	257.281	0.0677872	576.75	56.5312	104476	3.70056	0.00202528
71.0945	0.158	-183.456	260	0.0675759	574.875	60.4375	104035	3.70056	0.00167453
68.4479	0.2611	-183.456	301.094	0.0536299	576.25	54.4375	103717	3.70056	0.00293978
47.8641	0.1785	-183.456	325.375	0.0973085	586.125	61.4688	103401	3.70056	0.00464975
35.3095	0.1492	-183.456	328.094	0.134421	604.875	67.8125	103289	4.48715	0.00455963
58.275	0.1085	-183.456	310.719	0.136875	631.5	70.8125	103518	4.48715	0.00345056
51.1971	0.164881	-183.456	323.562	0.287415	677	79.625	103155	4.48715	0.00336303
56.738	0.2786	-183.456	337.281	0.229679	688.875	75.9688	102971	4.48715	0.00417828
75.7153	0.179375	-183.456	353.281	0.164911	679.75	76.125	102944	5.01924	0.00543738
53.632	0.191	-183.456	340.375	0.320177	678.75	81.4375	103060	5.01924	0.0040455
45.2229	0.184071	-183.456	319.125	0.233902	702.875	92.3125	103281	5.01924	0.00299106
31.9762	0.153667	-183.456	379.375	0.217137	701	81.25	102434	5.01924	0.00678872
49.281	0.126	-183.456	395.906	0.310963	735.625	87.2812	102313	4.68465	0.00698359
29.2917	0.1578	-183.456	403.656	0.268691	729.125	86.0312	102096	4.68465	0.00811081
22.4583	0.1335	-183.456	387.906	0.350218	740.125	85.375	102457	4.68465	0.00740081
32.0357	0.200857	-183.456	402.438	0.291591	741.375	87.875	101617	4.68465	0.00783259
26.0993	0.1356	-183.456	401.375	0.288777	703.75	81.5938	102158	4.36583	0.00818738
32.941	0.109267	-183.456	415.062	0.343156	719	79.0312	101827	4.36583	0.00929544
31.5083	0.219875	-183.456	419.062	0.375751	724.5	77.625	101922	4.36583	0.00945475
78.0541	0.2525	-183.456	439.938	0.229649	675.125	64.25	101919	4.36583	0.0103388
24.9798	0.169083	-183.456	411.031	0.18019	617.125	73.7812	102202	4.82643	0.00907672
27.4682	0.191916	-183.456	417.062	0.192162	606.25	61.1875	102423	4.82643	0.00983662
26.266	0.155933	-183.456	396.344	0.236705	637.375	67.0625	102764	4.82643	0.00851503
32.8214	0.183167	-183.456	369.344	0.259375	664.75	67.9062	102765	3.54401	0.00696575
30.1421	0.122262	-183.456	372.188	0.266934	689.375	64.0625	102878	3.54401	0.00667178
34	0.152667	-183.456	375.781	0.274142	706.5	60.25	102904	3.54401	0.00756825
46.4444	0.109167	-183.456	348.938	0.200382	710.875	54.7812	103189	3.54401	0.00608209
62.4904	0.0973	-183.456	298.156	0.191836	715.25	51.0938	104228	3.90462	0.00387416
87.324	0.1895	-183.456	306.438	0.14899	715.125	50.2188	103498	3.90462	0.00395409
111.618	0.291	-183.456	286.938	0.124004	698.375	41.5312	104278	3.90462	0.00276872
65.1905	0.189095	-183.456	258.031	0.137293	696.375	43.7188	104938	3.90462	0.00199069
64.5595	0.153571	-183.456	269.031	0.172042	694.125	36.875	104693	3.42982	0.00230791
83.8142	0.1572	-183.456	261.438	0.10078	686.5	33.5	104133	3.42982	0.00246091
87.3571	0.2318	-183.456	245.781	0.101281	678.25	28.6562	105514	3.42982	0.00126731
117.064	0.233917	-183.456	242.406	0.0902337	636.5	30.5625	105215	3.42982	0.00192072
177.222		-183.456	268.344	0.0118565	608.75	23.7188	104383	2.84551	0.00260275
141.25	0.2205	-183.456	244.156	0.0532348	577.125	26.7188	104919	2.84551	0.001994
88.827	0.379	-183.456	229.906	0.0507733	566	25.5312	105322	2.84551	0.00132422
126.943	0.356333	-183.456	229	0.0931929	528	27.625	105066	2.84551	0.00136547
146.282	0.368	-183.456	216.688	0.0671426	512.375	31.5938	105511	2.93721	0.00147
126.833	0.350562	-183.456	215.531	0.0870375	499.5	34.3125	105628	2.93721	0.00144797
106.614	0.3045	-183.456	243.781	0.050082	486.875	29.875	104939	2.93721	0.00166778
81.8229	0.1818	-183.456	245.938	0.0606089	478	36.625	104733	2.93721	0.0016615
109.271	0.204	-183.456	241.219	0.0663178	474	42.7812	104898	3.82638	0.00147338
109.94	0.062375	-183.456	259.188	0.0479314	481.5	42.625	104633	3.82638	0.00172244
45.6933	0.123967	675.168	239.656	0.0766294	660.5	46.9375	94182.8	4.2336	0.00190413
41.423	0.0992222	675.168	232.188	0.0816648	657.375	56.875	93786.2	4.2336	0.00134519
56.7689	0.237208	675.168	272.156	0.0680069	656.75	58.875	93626.6	4.2336	0.00272947
34.1876	0.152333	675.168	293.406	0.0877418	668.75	58.25	93452.5	4.2336	0.00293259
21.125	0.06475	675.168	286.25	0.135343	680.875	66.1562	93367.8	4.74711	0.00260241
24.5	0.0744168	675.168	279.688	0.170018	693.75	69.0625	93462.8	4.74711	0.00248672
27.5519	0.0958612	675.168	288.469	0.263228	721.25	77.9375	93253.1	4.74711	0.00264506
27.3239	0.155917	675.168	309.094	0.196503	731.25	72	93114.7	4.74711	0.00321553
25.0587	0.13775	675.168	325.25	0.251273	683.375	68.0625	93170.9	4.72844	0.00430719
37.8028	0.253333	675.168	306.875	0.282979	644.5	81.0938	93204.4	4.72844	0.00319556
20.616	0.193542	675.168	295.906	0.175562	666.375	84.8125	93439.1	4.72844	0.00310084
24.3021	0.20925	675.168	350.25	0.204195	677	75.0625	92793.8	4.72844	0.00589141
18.1488	0.128714	675.168	358.25	0.295026	706.75	85.6562	92782.2	5.38891	0.00656203
16.9547	0.124583	675.168	364.938	0.281714	733.75	81.4062	92579.1	5.38891	0.00578669
57.4762	0.101611	675.168	345.312	0.282408	737.875	87.625	92805.9	5.38891	0.00479619
19.6719	0.14625	675.168	374.438	0.240972	746.25	81.0312	92193.8	5.38891	0.00652669
18.0836	0.1549	675.168	372.625	0.224371	723.375	76.8438	92645.9	4.17939	0.00896894
19.4526	0.160111	675.168	378.719	0.305454	690.125	74.5938	92362.2	4.17939	0.00696391
19.144	0.1357	675.168	378.188	0.274945	693.875	79.875	92504.1	4.17939	0.00719406
33.5838	0.3824	675.168	412.062	0.164723	707	67.125	92361.2	4.17939	0.00889216
25.2677	0.0715	675.168	373.062	0.197435	708.375	67.1875	92689.1	4.1194	0.00796309
22.1383	0.15525	675.168	386.312	0.237769	707.75	49.6562	92891.6	4.1194	0.00945216
32.2428	0.128375	675.168	361.062	0.199232	692.625	62.7188	93189.4	4.1194	0.00687212
24.0357	0.1158	675.168	335.75	0.292616	705.375	62.625	93133.8	3.75119	0.00533222
21.6033	0.100333	675.168	343.594	0.313332	722.375	58.625	93252.8	3.75119	0.00516647
30.2333	0.16225	675.168	340.594	0.282235	690.125	55.75	93268.4	3.75119	0.00607431
33.6888	0.151433	675.168	314.375	0.23988	679.125	51.5	93386.2	3.75119	0.00453444
21.6039	0.158694	675.168	275.656	0.309611	682	43.7812	94089.1	3.42588	0.00347444
37.0484	0.148167	675.168	279.688	0.238537	685.5	45.9062	93547.8	3.42588	0.00301753
32.4956	0.1443	675.168	273.531	0.193416	682.875	40.7188	93946.9	3.42588	0.00300122
45.0685	0.161055	675.168	235.844	0.206373	680.75	38.1875	94661.6	3.42588	0.00190066
42.8095	0.155083	675.168	250.469	0.172952	676.875	30.875	94361.9	2.83647	0.00251066
39.6476	0.123583	675.168	243.938	0.120759	669.5	29.4375	93810.3	2.83647	0.00203134
47.4271	0.175472	675.168	217.812	0.156739	661.5	26.8125	94911.6	2.83647	0.00127275
65.0846	0.1424	675.168	217	0.0977935	641	26.6562	94841.2	2.83647	0.00157494
61.3889	0.0926334	675.168	239.25	0.16059	625	22.5625	94073.4	1.90743	0.00221794
53.5769	0.0996667	675.168	221.188	0.111091	615.125	23.8125	94465.9	1.90743	0.00192128
57.318	0.163	675.168	211.594	0.0440622	597	31.8438	94722.2	1.90743	0.00148275
70.3483		675.168	199.938	0.0429808	570.75	57.0312	94508.4	1.90743	0.00122844
54.0478		675.168	189.219	0.063456	539	73.875	94843.8	1.82843	0.00106938
49.901		675.168	182.844	0.0604335	518	84.125	94986.2	1.82843	0.0008805
46.6975		675.168	217.219	0.0607799	500	35.2812	94396.6	1.82843	0.00124387
41.375	0.114	675.168	228.688	0.0926084	496.125	32.7812	94240.6	1.82843	0.00177169
40.0781	0.104048	675.168	224.312	0.0934667	491.75	39.9062	94447.2	2.50793	0.00162209
29.9271	0.0634722	675.168	242.75	0.102292	494	41.2812	94214.1	2.50793	0.00218406
41.8584	0.1153	675.168	239.656	0.0612809	656.625	46.9375	94182.8	4.20984	0.00190413
39.8915	0.101333	675.168	232.188	0.0784549	653.625	56.875	93786.2	4.20984	0.00134519
50.9504	0.22425	675.168	272.156	0.0441467	655.125	58.875	93626.6	4.20984	0.00272947
33.0758	0.160125	675.168	293.406	0.0737215	666.75	58.25	93452.5	4.20984	0.00293259
20.0469	0.1231	675.168	286.25	0.1027	677.875	66.1562	93367.8	4.84432	0.00260241
30.8958	0.0799582	675.168	279.688	0.10827	689.5	69.0625	93462.8	4.84432	0.00248672
43.5356	0.1185	675.168	288.469	0.166961	717	77.9375	93253.1	4.84432	0.00264506
30.462	0.160333	675.168	309.094	0.143136	727	72	93114.7	4.84432	0.00321553
32.0135	0.1377	675.168	325.25	0.142279	674.375	68.0625	93170.9	4.83253	0.00430719
47.8964	0.229833	675.168	306.875	0.150013	635.125	81.0938	93204.4	4.83253	0.00319556
21.8047	0.20925	675.168	295.906	0.174279	658.5	84.8125	93439.1	4.83253	0.00310084
31.8906	0.225083	675.168	350.25	0.132833	665.125	75.0625	92793.8	4.83253	0.00589141
28.0615	0.149083	675.168	358.25	0.164686	691.25	85.6562	92782.2	5.46168	0.00656203
23.2181	0.172048	675.168	364.938	0.168946	720.375	81.4062	92579.1	5.46168	0.00578669
43.8611	0.121805	675.168	345.312	0.176812	726.125	87.625	92805.9	5.46168	0.00479619
22.6302	0.160667	675.168	374.438	0.161566	737.625	81.0312	92193.8	5.46168	0.00652669
25.713	0.180233	675.168	372.625	0.15267	715.375	76.8438	92645.9	4.23387	0.00896894
18.5213	0.184278	675.168	378.719	0.191772	682.125	74.5938	92362.2	4.23387	0.00696391
19.1146	0.160694	675.168	378.188	0.183662	686.125	79.875	92504.1	4.23387	0.00719406
30.9534	0.3769	675.168	412.062	0.134317	698.125	67.125	92361.2	4.23387	0.00889216
23.4443	0.1485	675.168	373.062	0.13135	700.125	67.1875	92689.1	4.12783	0.00796309
22.0949	0.183625	675.168	386.312	0.148747	699.5	49.6562	92891.6	4.12783	0.00945216
24.9671	0.14375	675.168	361.062	0.151506	683	62.7188	93189.4	4.12783	0.00687212
24.7321	0.135933	675.168	335.75	0.208977	695.125	62.625	93133.8	3.79921	0.00533222
28.1447	0.1405	675.168	343.594	0.191743	714.25	58.625	93252.8	3.79921	0.00516647
36.49	0.187	675.168	340.594	0.152508	681.875	55.75	93268.4	3.79921	0.00607431
30.5018	0.179	675.168	314.375	0.115823	668.75	51.5	93386.2	3.79921	0.00453444
20.6229	0.138767	675.168	275.656	0.187873	672	43.7812	94089.1	3.58404	0.00347444
37.7188	0.160976	675.168	279.688	0.164027	675.5	45.9062	93547.8	3.58404	0.00301753
28.3854	0.18175	675.168	273.531	0.10139	672.875	40.7188	93946.9	3.58404	0.00300122
38.7448	0.156694	675.168	235.844	0.115706	670.75	38.1875	94661.6	3.58404	0.00190066
36.3333	0.1734	675.168	250.469	0.10561	666.875	30.875	94361.9	2.92052	0.00251066
34.1994	0.121167	675.168	243.938	0.0851586	659.5	29.4375	93810.3	2.92052	0.00203134
34.1094	0.194333	675.168	217.812	0.095076	651.5	26.8125	94911.6	2.92052	0.00127275
35.3623	0.154583	675.168	217	0.0590074	631	26.6562	94841.2	2.92052	0.00157494
65.1458	0.109733	675.168	239.25	0.10225	614.875	22.5625	94073.4	1.97875	0.00221794
47.6993	0.120611	675.168	221.188	0.0796002	604.125	23.8125	94465.9	1.97875	0.00192128
45.3171	0.1545	675.168	211.594	0.0185561	585.25	31.8438	94722.2	1.97875	0.00148275
37.9039		675.168	199.938	0.0152831	558	57.0312	94508.4	1.97875	0.00122844
24.3012		675.168	189.219	0.0454182	519.5	73.875	94843.8	1.88106	0.00106938
18.7083		675.168	182.844	0.0319823	498.375	84.125	94986.2	1.88106	0.0008805
19.8028		675.168	217.219	0.0448886	465.5	35.2812	94396.6	1.88106	0.00124387
18.0156	0.14175	675.168	228.688	0.0704104	459.125	32.7812	94240.6	1.88106	0.00177169
25.4286	0.159896	675.168	224.312	0.0699179	454.75	39.9062	94447.2	2.55482	0.00162209
19.401	0.0923612	675.168	242.75	0.0901838	457	41.2812	94214.1	2.55482	0.00218406
14.5652		1499.74	232.656	-0.00225757	0.375	125.094	90063.8	4.45603	0.00234906
28.7121		1499.74	229.344	0.0108136	0	141	89481.6	4.45603	0.00251294
22.9106	0.082333	1499.74	265.969	0.0663482	10	45.5938	89694.4	4.45603	0.00364663
18.2917	0.117	1499.74	301.406	0.0764624	22.75	45.4688	89424.7	4.45603	0.00581025
24.0833	0.1223	1499.74	306.094	0.153564	22.375	47.4062	89481.9	4.67018	0.00620784
9.70833	0.153333	1499.74	278.969	0.22753	45.875	52.8125	89516.9	4.67018	0.00458009
	0.146833	1499.74	288.656	0.247737	140.625	65.8125	89438.1	4.67018	0.00455259
	0.2302	1499.74	308.156	0.191882	25.375	53.6875	89266.2	4.67018	0.00575719
7.875	0.204	1499.74	307.625	0.258736	15.75	60.6562	89314.7	5.3846	0.00615797
7.56522	0.1968	1499.74	305.812	0.288215	37.75	61.5	89359.4	5.3846	0.00571341
11.5833	0.140976	1499.74	276	0.409024	90.875	83.2812	89421.6	5.3846	0.00405659
8.83333	0.2522	1499.74	333.844	0.402403	116.875	65.6562	89048.4	5.3846	0.007155
6.45833	0.156655	1499.74	345.062	0.390897	230	79.4375	89115	4.5788	0.00775216
15.4167	0.1754	1499.74	357.188	0.289409	249.5	63.5625	88951.9	4.5788	0.00937641
	0.201262	1499.74	341.469	0.382321	223.375	67.5312	89186.6	4.5788	0.00867734
10.7708	0.160571	1499.74	356.562	0.327435	250.25	65.625	88650	4.5788	0.0101163
7.25	0.144139	1499.74	353.125	0.381559	225.75	62.25	88945.6	4.29947	0.00898984
9.5	0.126167	1499.74	360.438	0.34245	270.25	68.0938	88732.5	4.29947	0.0104561
9.86111	0.215048	1499.74	370.25	0.367946	261.75	55.7188	88917.2	4.29947	0.0110167
10.4306	0.22	1499.74	371.156	0.408761	223.875	47.25	89138.1	4.29947	0.0115161
11.5208	0.141867	1499.74	351.25	0.288032	244.875	61.3125	89015.3	3.90488	0.0100646
10.1594	0.234611	1499.74	361.75	0.315656	271.25	54.4688	89209.7	3.90488	0.0102705
12.9028	0.1323	1499.74	338.375	0.336785	339.875	56.375	89350.9	3.90488	0.00805919
9.14583	0.114396	1499.74	319.688	0.331745	408.875	60.5	89262.8	3.93768	0.00639606
14.2708	0.108476	1499.74	328.75	0.346947	467.375	51.6562	89395.3	3.93768	0.00771847
14.0402	0.160944	1499.74	325.594	0.30346	513	54.3438	89410.6	3.93768	0.00790297
10.0229	0.12035	1499.74	311.562	0.186737	427.125	41	89506.9	3.93768	0.00631622
	0.232533	1499.74	265.625	0.315864	399	43.2188	89998.8	3.95561	0.00446609
	0.2322	1499.74	277.031	0.200113	359.375	38.0625	89496.2	3.95561	0.00437081
19.6341	0.1965	1499.74	259.75	0.106758	320.625	30.0312	90166.6	3.95561	0.00340938
	0.2126	1499.74	237.719	0.196317	234.75	36.8438	90157.5	3.95561	0.00241025
	0.151167	1499.74	248.594	0.102714	88	34.0938	90158.4	3.94799	0.00277556
13.1014	0.1755	1499.74	232.875	0.0209408	0	39	89699.7	3.94799	0.00276606
10.4722		1499.74	205.469	0.105064	0	57.8125	90725	3.94799	0.00152891
6.54045		1499.74	220.125	0.0258765	0	59.375	90242.2	3.94799	0.00247934
11.25		1499.74	239.031	0.00415101	0	48.875	89777.5	3.76006	0.00268937
		1499.74	223.531	0.00446475	0	44.0938	90007.5	3.76006	0.00216166
		1499.74	215.438	0.00785207	0	50.625	90200	3.76006	0.00177053
22.6291		1499.74	215.25	0.0061986	0	55.4062	89995.9	3.76006	0.00187334
6.70833		1499.74	207.906	0.0130067	0	61.1875	90169.1	3.97505	0.00153634
13.5833		1499.74	186.906	0.00631632	0	76.375	90314.4	3.97505	0.00126653
14.5978		1499.74	210.656	0.0128964	0	74.75	90004.1	3.97505	0.00163606
28.5595		1499.74	220.969	0.00544147	0	82.8438	89993.1	3.97505	0.00171184
23.7778		1499.74	211.844	0.00553263	0	98.3438	90059.4	3.55257	0.00175709
16.9896		1499.74	220.062	0.000967778	0	103.688	90043.1	3.55257	0.00201044
60.9459		535.904	243.438	-0.0024319	0	137.688	95190.3	3.82451	0.00233144
52.856		535.904	244.781	0.00381243	0	155.062	94568.4	3.82451	0.00267169
40.1793	0.1365	535.904	276	0.0138056	2.625	55.5938	94690.9	3.82451	0.00401191
19.8666	0.15975	535.904	319.906	0.109076	8.625	33.4062	94312.5	3.82451	0.00630131
17.0625	0.171875	535.904	323.562	0.0745097	26.625	41.625	94389.1	4.87648	0.007002
12.9688	0.117375	535.904	296.656	0.120485	59.125	45.5938	94408.1	4.87648	0.0054105
14.2889	0.122607	535.904	309.188	0.230507	163.75	57.1562	94252.2	4.87648	0.00497091
11.7168	0.1988	535.904	327.5	0.248274	106.125	43.8125	94119.1	4.87648	0.00690556
13.0944	0.2079	535.904	333.906	0.153709	43.75	42.0312	94162.8	4.94233	0.00750622
13.3184	0.176133	535.904	326.281	0.252394	35.875	51.1562	94193.8	4.94233	0.00687509
10.8611	0.110792	535.904	303.562	0.262255	100.125	68.1875	94234.4	4.94233	0.00544053
13.7448	0.231222	535.904	353.5	0.276371	169.75	57.0312	93775.3	4.94233	0.00804038
16.0708	0.107167	535.904	372.875	0.293073	286.375	65.25	93742.2	4.64919	0.00843425
16.8458	0.1305	535.904	379.531	0.291887	268.375	49.6562	93647.2	4.64919	0.0106929
9.85714	0.144952	535.904	362.75	0.255066	136.75	51.7188	93934.4	4.64919	0.0104377
12.4792	0.151357	535.904	377.156	0.364128	177.625	60.75	93322.5	4.64919	0.0124499
9.46332	0.105567	535.904	370.438	0.290606	182.875	61.125	93602.8	4.45376	0.00987869
11.3776	0.117233	535.904	381.344	0.290329	235.75	56.5938	93400.6	4.45376	0.0119962
15.8512	0.217722	535.904	388.938	0.337854	240	54.125	93573.1	4.45376	0.0123251
11.7727	0.2135	535.904	384.969	0.25505	221.5	48.25	93885.9	4.45376	0.0123067
13.8295	0.1768	535.904	379.312	0.355147	264.125	51.5	93701.9	4.01137	0.0115567
11.9651	0.207	535.904	382.125	0.175988	290	40.625	93980	4.01137	0.0115183
16.7743	0.152667	535.904	363.094	0.264886	353.375	45.5625	94061.6	4.01137	0.00986078
17.1719	0.123333	535.904	345.188	0.230212	426.125	50.125	93966.9	4.18763	0.00758878
18.3297	0.134524	535.904	352.625	0.264131	481	43.5938	94131.6	4.18763	0.009273
18.003	0.196805	535.904	356	0.307117	515.375	42	94143.1	4.18763	0.00900613
18.4035	0.152067	535.904	336.125	0.253709	447.875	32.375	94342.5	4.18763	0.00793759
18.0328	0.243767	535.904	284.5	0.183905	436.125	38.25	94950.3	3.78783	0.00524584
50.55	0.3153	535.904	292.219	0.2298	381.875	30.75	94427.8	3.78783	0.00513609
59.5392	0.254	535.904	279.031	0.0370042	340.75	22.3125	95329.4	3.78783	0.00397325
102.729	0.2953	535.904	248.188	0.126423	166.125	30.6875	95187.2	3.78783	0.00303434
68.3542	0.194056	535.904	257.562	0.104335	77.625	26.7188	95215.3	3.28636	0.00337978
75.1913	0.1915	535.904	254.688	0.056739	18.25	30.7812	94868.4	3.28636	0.00316266
110.736		535.904	210.906	0.0109092	0	54.7188	96068.8	3.28636	0.00161228
152.8		535.904	226.938	0.0112386	0	58.3438	95338.4	3.28636	0.00242266
82.55		535.904	256.312	0.00275317	0	46.375	94922.5	2.66363	0.00275659
73.9462		535.904	234.938	0.0110694	0	54.8125	95171.9	2.66363	0.00208681
175.243		535.904	221.25	0.00345	0	56.7188	95421.2	2.66363	0.00164334
214.579		535.904	221.875	-0.00769112	0	62.3438	95188.1	2.66363	0.00166391
204.46		535.904	210.969	-0.00441422	0	70	95423.4	2.60176	0.00132219
218.274		535.904	194	-0.0026334	0	83.625	95570	2.60176	0.00111587
202.06		535.904	217.812	-0.00616432	0	83.25	95258.4	2.60176	0.00160447
165.234		535.904	228.781	-0.00205613	0	94.3125	95271.6	2.60176	0.00172578
180.354		535.904	224.938	0.0034758	0	109.562	95270	2.83542	0.00168331
101.828		535.904	229.031	0.00493339	0	115.781	95243.8	2.83542	0.00191903
97.8879		535.904	243.438	-0.000754155	0	137.688	95190.3	3.82451	0.00233144
74.8123		535.904	244.781	0.00300582	0	155.062	94568.4	3.82451	0.00267169
58.043		535.904	276	0.0610325	2.625	55.5938	94690.9	3.82451	0.00401191
26.2464	0.189833	535.904	319.906	0.0873461	8.625	33.4062	94312.5	3.82451	0.00630131
19.8802	0.2027	535.904	323.562	0.120979	26.625	41.625	94389.1	4.87648	0.007002
13.9219	0.111625	535.904	296.656	0.15216	59.125	45.5938	94408.1	4.87648	0.0054105
16.8755	0.135714	535.904	309.188	0.250896	163.75	57.1562	94252.2	4.87648	0.00497091
14.6983	0.1915	535.904	327.5	0.281678	106.125	43.8125	94119.1	4.87648	0.00690556
15.341	0.259	535.904	333.906	0.196675	43.75	42.0312	94162.8	4.94233	0.00750622
14.3756	0.197375	535.904	326.281	0.304601	35.875	51.1562	94193.8	4.94233	0.00687509
10.732	0.119071	535.904	303.562	0.402682	100.125	68.1875	94234.4	4.94233	0.00544053
16.1406	0.204667	535.904	353.5	0.266736	169.75	57.0312	93775.3	4.94233	0.00804038
15.5229	0.124854	535.904	372.875	0.434471	286.375	65.25	93742.2	4.64919	0.00843425
16.728	0.1587	535.904	379.531	0.296757	268.375	49.6562	93647.2	4.64919	0.0106929
16.1786	0.142452	535.904	362.75	0.41824	136.75	51.7188	93934.4	4.64919	0.0104377
21.9702	0.155571	535.904	377.156	0.329735	177.625	60.75	93322.5	4.64919	0.0124499
16.587	0.110433	535.904	370.438	0.375296	182.875	61.125	93602.8	4.45376	0.00987869
18.9838	0.112167	535.904	381.344	0.334728	235.75	56.5938	93400.6	4.45376	0.0119962
25.6972	0.198367	535.904	388.938	0.307761	240	54.125	93573.1	4.45376	0.0123251
20.0473	0.24625	535.904	384.969	0.371806	221.5	48.25	93885.9	4.45376	0.0123067
19.4565	0.162967	535.904	379.312	0.285078	264.125	51.5	93701.9	4.01137	0.0115567
16.9228	0.205167	535.904	382.125	0.340255	290	40.625	93980	4.01137	0.0115183
18.1736	0.148458	535.904	363.094	0.229513	353.375	45.5625	94061.6	4.01137	0.00986078
15.6667	0.124357	535.904	345.188	0.319272	426.125	50.125	93966.9	4.18763	0.00758878
22.5127	0.139214	535.904	352.625	0.328538	481	43.5938	94131.6	4.18763	0.009273
18.2083	0.171472	535.904	356	0.332644	515.375	42	94143.1	4.18763	0.00900613
23.3397	0.161933	535.904	336.125	0.164226	447.875	32.375	94342.5	4.18763	0.00793759
21.9078	0.2474	535.904	284.5	0.308186	436.125	38.25	94950.3	3.78783	0.00524584
48.1165	0.346958	535.904	292.219	0.0966108	381.875	30.75	94427.8	3.78783	0.00513609
25.9753	0.232	535.904	279.031	0.0524113	340.75	22.3125	95329.4	3.78783	0.00397325
41.1726	0.268	535.904	248.188	0.207596	166.125	30.6875	95187.2	3.78783	0.00303434
37.2222	0.220444	535.904	257.562	0.121216	77.625	26.7188	95215.3	3.28636	0.00337978
35.9379	0.173	535.904	254.688	0.0375056	18.25	30.7812	94868.4	3.28636	0.00316266
83.2969		535.904	210.906	0.0761314	0	54.7188	96068.8	3.28636	0.00161228
153.267		535.904	226.938	0.0238496	0	58.3438	95338.4	3.28636	0.00242266
85.95		535.904	256.312	-0.000529398	0	46.375	94922.5	2.66363	0.00275659
78.8565		535.904	234.938	0.0113252	0	54.8125	95171.9	2.66363	0.00208681
135.799		535.904	221.25	0.00328101	0	56.7188	95421.2	2.66363	0.00164334
182.444		535.904	221.875	0.00197862	0	62.3438	95188.1	2.66363	0.00166391
181.067		535.904	210.969	0.010347	0	70	95423.4	2.60176	0.00132219
220.536		535.904	194	0.00442856	0	83.625	95570	2.60176	0.00111587
209.44		535.904	217.812	0.0131329	0	83.25	95258.4	2.60176	0.00160447
169.615		535.904	228.781	0.00984651	0	94.3125	95271.6	2.60176	0.00172578
172.542		535.904	224.938	0.0110614	0	109.562	95270	2.83542	0.00168331
102.969		535.904	229.031	0.00121846	0	115.781	95243.8	2.83542	0.00191903
39.1877		401.888	245.156	0.00973007	0	146.5	95550.9	2.58044	0.00284181
33.9352		401.888	265.188	0.0178952	0	137.75	94951.6	2.58044	0.00322834
18.9873		401.888	269.469	0.0484457	0.25	62.4688	95092.2	2.58044	0.00428581
17.9271	0.148	401.888	316.812	0.0542027	1	35.8438	94771.9	2.58044	0.00595594
12.3281	0.226333	401.888	296.438	0.0782633	3.125	52.2188	94844.7	2.79436	0.00478319
13.0156	0.10719	401.888	286.406	0.130101	49.25	59.1562	94834.4	2.79436	0.00403031
15.4429	0.163722	401.888	304.156	0.19884	56.5	62.625	94734.4	2.79436	0.00438363
12.661	0.172	401.888	325.781	0.204199	4.625	52.25	94530	2.79436	0.005441
11.8388	0.2345	401.888	340.531	0.106252	6.5	45.0938	94572.5	2.98501	0.00648856
10.4183	0.21625	401.888	315.125	0.239593	13.375	56.9375	94688.1	2.98501	0.00537653
13.3414	0.182233	401.888	300.312	0.218462	70.125	73.9688	94690	2.98501	0.00443781
10.8594	0.1741	401.888	343.156	0.246914	102.875	64.5	94267.2	2.98501	0.00650722
15.8469	0.157111	401.888	367.688	0.328197	164.125	70.6875	94255.3	2.60424	0.00719206
12.3881	0.181708	401.888	374.688	0.29098	79.375	52.0312	94146.9	2.60424	0.00809213
8.72619	0.1262	401.888	356.75	0.210574	11.25	63.9062	94355.3	2.60424	0.00792794
10.7381	0.122917	401.888	377	0.242563	5.875	65.25	93753.8	2.60424	0.00904578
11.2937	0.126639	401.888	367.906	0.323034	17.75	72.2188	94044.4	2.61364	0.00754572
10.6165	0.1436	401.888	375.844	0.323891	4.625	59.4062	93839.7	2.61364	0.00836109
12.6821	0.166459	401.888	386.781	0.288857	13	62.6562	93990.9	2.61364	0.00930625
12.6176	0.185	401.888	374.125	0.162749	8.75	57.0938	94321.9	2.61364	0.00924778
11.5072	0.139619	401.888	361.188	0.380745	13.125	65.1562	94101.2	2.99649	0.00733603
13.4429	0.140714	401.888	354.156	0.380153	70.125	62.8125	94370.9	2.99649	0.00662569
18.808	0.146214	401.888	349.031	0.365805	132.25	57.75	94483.4	2.99649	0.00578941
16.1354	0.123857	401.888	340.219	0.325866	168.625	54.8438	94398.8	2.76433	0.00540987
16.8616	0.140639	401.888	345.219	0.310313	157	47.875	94568.8	2.76433	0.00710359
15.2627	0.126048	401.888	348	0.287829	157.5	43.6875	94593.1	2.76433	0.00654053
15.3284	0.1875	401.888	333	0.180936	53	34.0938	94812.2	2.76433	0.00620478
13.0037	0.183083	401.888	283.906	0.312488	21.75	42.5938	95377.5	2.42213	0.00445862
24.565	0.198333	401.888	281.688	0.148445	0	35.2812	94843.1	2.42213	0.00418572
18.4729	0.073	401.888	248.375	0.0713349	0	32.7188	95738.8	2.42213	0.00243562
36.4792	0.38675	401.888	262.156	0.0671473	0	30.0625	95550.6	2.42213	0.00347512
23.6806	0.17175	401.888	253.469	0.137716	0	25.1562	95639.7	2.17939	0.00292972
17.5127	0.17125	401.888	261.688	0.0663375	0	32.0312	95257.8	2.17939	0.00301412
30.5625		401.888	204.5	0.0126703	0	64.1562	96387.2	2.17939	0.00155503
66.3497		401.888	232.188	0.0325382	0	60.4375	95693.8	2.17939	0.00255722
47.1833		401.888	250.25	-0.0022813	0	47.9375	95294.4	1.80556	0.002972
37.1111		401.888	233.312	0.00793112	0	52.625	95561.6	1.80556	0.00235228
38.3769		401.888	219.938	0.00785632	0	55.7812	95785.9	1.80556	0.00194912
61.1053		401.888	219.469	0.00868735	0	61.2812	95569.7	1.80556	0.00204344
48.6875		401.888	200.5	0.0058753	0	72.0625	95782.5	1.67359	0.00136484
		401.888	194.75	0.0204385	0	82.2812	95914.4	1.67359	0.00120169
49.4197		401.888	213.219	0.0128505	0	87.2188	95632.5	1.67359	0.00155766
41.1719		401.888	214.938	0.000517384	0	94.3125	95655.3	1.67359	0.00163434
48.3698		401.888	220.219	0.0114186	0	109.906	95644.4	2.06848	0.00191922
38.4219		401.888	223.938	0.00276254	0	123.125	95589.4	2.06848	0.00205091
49.1642		401.888	245.156	0.0155769	0	146.5	95550.9	2.28452	0.00284181
43.2758		401.888	265.188	0.0520634	0	137.75	94951.6	2.28452	0.00322834
27.9203	0.09	401.888	269.469	0.0225803	0.625	62.4688	95092.2	2.28452	0.00428581
27.8691	0.1475	401.888	316.812	0.0720299	1.375	35.8438	94771.9	2.28452	0.00595594
17.8698	0.166	401.888	296.438	0.0997506	13.75	52.2188	94844.7	2.48247	0.00478319
19.9479	0.0792977	401.888	286.406	0.143436	59.625	59.1562	94834.4	2.48247	0.00403031
24.0011	0.119861	401.888	304.156	0.218005	64.875	62.625	94734.4	2.48247	0.00438363
19.4852	0.213	401.888	325.781	0.21554	10	52.25	94530	2.48247	0.005441
15.9427	0.214833	401.888	340.531	0.0553613	6.875	45.0938	94572.5	2.74248	0.00648856
19.2935	0.184333	401.888	315.125	0.239546	14.75	56.9375	94688.1	2.74248	0.00537653
21.3561	0.177	401.888	300.312	0.255849	77.25	73.9688	94690	2.74248	0.00443781
16.526	0.16325	401.888	343.156	0.253865	117.25	64.5	94267.2	2.74248	0.00650722
17.1833	0.122417	401.888	367.688	0.294203	183.625	70.6875	94255.3	2.39645	0.00719206
17.3845	0.149042	401.888	374.688	0.173411	113	52.0312	94146.9	2.39645	0.00809213
12.9306	0.1233	401.888	356.75	0.276946	33.125	63.9062	94355.3	2.39645	0.00792794
13.6667	0.1246	401.888	377	0.185756	19.75	65.25	93753.8	2.39645	0.00904578
14.5917	0.117361	401.888	367.906	0.313271	18.75	72.2188	94044.4	2.48409	0.00754572
14.9892	0.1487	401.888	375.844	0.329576	4	59.4062	93839.7	2.48409	0.00836109
16.3512	0.16475	401.888	386.781	0.158711	11.625	62.6562	93990.9	2.48409	0.00930625
17.1201	0.203333	401.888	374.125	0.198094	9.125	57.0938	94321.9	2.48409	0.00924778
16.757	0.144714	401.888	361.188	0.369926	15.25	65.1562	94101.2	2.61031	0.00733603
17.5258	0.157929	401.888	354.156	0.313032	73.125	62.8125	94370.9	2.61031	0.00662569
22.5208	0.159905	401.888	349.031	0.331523	134.875	57.75	94483.4	2.61031	0.00578941
22.7917	0.135604	401.888	340.219	0.265886	173	54.8438	94398.8	2.43139	0.00540987
20.8965	0.161611	401.888	345.219	0.290538	167.125	47.875	94568.8	2.43139	0.00710359
23.0018	0.152167	401.888	348	0.285026	171.75	43.6875	94593.1	2.43139	0.00654053
22.9357	0.198	401.888	333	0.171749	70.125	34.0938	94812.2	2.43139	0.00620478
18.6619	0.16845	401.888	283.906	0.255354	36.25	42.5938	95377.5	2.07222	0.00445862
43.214	0.214333	401.888	281.688	0.142264	0	35.2812	94843.1	2.07222	0.00418572
29.5491	0.2225	401.888	248.375	0.0353382	0	32.7188	95738.8	2.07222	0.00243562
53.128	0.347	401.888	262.156	0.100776	0	30.0625	95550.6	2.07222	0.00347512
36.0595	0.155875	401.888	253.469	0.156544	0	25.1562	95639.7	2.20276	0.00292972
24.5054	0.16325	401.888	261.688	0.0421923	0	32.0312	95257.8	2.20276	0.00301412
32.6845		401.888	204.5	0.011165	0	64.1562	96387.2	2.20276	0.00155503
56.7097		401.888	232.188	0.0186733	0	60.4375	95693.8	2.20276	0.00255722
60.6583		401.888	250.25	-0.00273391	0	47.9375	95294.4	1.73202	0.002972
37.1514		401.888	233.312	0.00727149	0	52.625	95561.6	1.73202	0.00235228
38.5298		401.888	219.938	0.00549452	0	55.7812	95785.9	1.73202	0.00194912
61.86		401.888	219.469	-0.00111486	0	61.2812	95569.7	1.73202	0.00204344
96.3995		401.888	200.5	0.00295243	0	72.0625	95782.5	1.46227	0.00136484
85.5417		401.888	194.75	0.0103631	0	82.2812	95914.4	1.46227	0.00120169
74.925		401.888	213.219	0.0102149	0	87.2188	95632.5	1.46227	0.00155766
45.5		401.888	214.938	0.00493439	0	94.3125	95655.3	1.46227	0.00163434
		401.888	220.219	0.0102267	0	109.906	95644.4	1.74666	0.00191922
52.3333		401.888	223.938	0.00667701	0	123.125	95589.4	1.74666	0.00205091
218.463	2.03325	1099.36	242.281	0.0517927	4	35.0312	89399.1	3.14723	0.00195875
135.446	2.00325	1099.36	257.344	0.0280403	0	32.8438	89066.9	3.14723	0.00213519
55.2834	0.0847666	1099.36	269.031	0.0623885	3.75	31.9062	89109.4	3.14723	0.00169497
59.863	0.159416	1099.36	307.438	0.0565723	0.25	31.3125	88927.2	3.14723	0.00345344
54.5417	0.333	1099.36	317.562	0.0371407	1	27.7812	88914.7	3.65831	0.00467187
71.1597	0.362694	1099.36	288.594	0.112047	7.625	41.8438	88992.8	3.65831	0.00332609
62.2765	0.43375	1099.36	306.562	0.103237	2.625	45.5	88876.6	3.65831	0.00307841
171.269	2.012	1099.36	322.5	0.104776	9.5	43.7188	88657.2	3.65831	0.00414444
96.7058	0.183	1099.36	336.062	0.144892	16.5	44.25	88645	4.32631	0.00500072
105.412	0.217	1099.36	324.469	0.130582	5.125	42.7812	88812.5	4.32631	0.00454966
135.751	0.625875	1099.36	314.594	0.130193	2.75	48.875	88923.8	4.32631	0.00416537
45.881	0.206375	1099.36	335.312	0.154044	12.5	49.7188	88523.8	4.32631	0.00454937
77.1611	0.262286	1099.36	361.406	0.184806	56	53.0625	88562.8	4.11635	0.00564497
79.8046	0.102111	1099.36	359	0.15282	80.375	48.625	88270.3	4.11635	0.00506278
53.4107	0.186583	1099.36	347.719	0.141919	32	48.5312	88575.6	4.11635	0.00573216
99.9917	0.159611	1099.36	364.094	0.167648	42	48.5625	87981.9	4.11635	0.00519116
47.4167	0.182	1099.36	359.719	0.156054	33	52.25	88399.7	3.90258	0.00607509
40.656	0.182083	1099.36	359.719	0.194181	26.125	42.3125	88172.8	3.90258	0.00579634
29.7226	0.224778	1099.36	366.719	0.182918	48.375	46.125	88292.8	3.90258	0.00566256
40.3027	0.259417	1099.36	372.5	0.175952	39.875	38.9375	88422.8	3.90258	0.00778081
106.391	0.2056	1099.36	364.562	0.164278	29.5	42.0312	88515.9	3.0941	0.00717728
88.4513	0.1775	1099.36	361.219	0.122919	2.25	37.8125	88702.8	3.0941	0.00732466
45.131	0.146	1099.36	365.625	0.149416	2.125	34.0938	88982.5	3.0941	0.00813059
47.8021	0.148	1099.36	346.188	0.241238	9.125	33.5	88905	3.37294	0.00692056
49.3573	0.164417	1099.36	334.75	0.215604	43	37.3438	88966.9	3.37294	0.00612513
19.4695	0.137833	1099.36	325.531	0.1743	35.625	37.5	88951.2	3.37294	0.00503197
28.0195	0.185111	1099.36	315.219	0.17391	19.75	30.9062	89006.2	3.37294	0.00440528
48.9181	0.136143	1099.36	273.438	0.19356	34	34.0625	89498.8	3.45139	0.00307125
58.493	0.126778	1099.36	273.344	0.0978991	39.375	30.4688	89060	3.45139	0.00191397
69.27	0.1725	1099.36	262.062	0.0804608	22.5	25.5938	89392.5	3.45139	0.00203594
93.8787	0.268833	1099.36	257.094	0.131194	7.875	24.4062	89956.9	3.45139	0.00296866
82.9444	0.119278	1099.36	237.719	0.113716	0.5	22.9062	89814.4	2.78674	0.00183603
111.884	0.181625	1099.36	244.844	0.0279513	0	20.25	89175.6	2.78674	0.00197184
76.25		1099.36	234.031	0.0812842	0	16.9062	90136.2	2.78674	0.00211734
172.348	0.207733	1099.36	231.594	0.0532379	0	17.3438	90130.3	2.78674	0.00225063
160.695	0.224167	1099.36	244.719	0.0350355	0	14.9688	89441.2	2.49432	0.00216416
180.598	0.29725	1099.36	225.906	0.0582267	0	16.3438	89789.1	2.49432	0.00204191
116.596	0.206889	1099.36	217.469	0.0543559	0	15.1562	89994.4	2.49432	0.00172581
106.006	0.273389	1099.36	215.062	0.0330154	0	16.3438	89754.1	2.49432	0.00170972
93.3033	0.246	1099.36	200.844	0.0731305	0	25.0938	90030.6	2.60697	0.00147881
117.653	0.208167	1099.36	199.031	0.0369009	0	28.4688	90166.9	2.60697	0.00143253
111.865	0.171778	1099.36	237.531	0.0363572	0	20.75	89637.5	2.60697	0.00214341
102.016		1099.36	252.219	0.0252003	0	20.5625	89499.1	2.60697	0.00254634
132.401	0.194	1099.36	237.875	0.0414155	0	24.0312	89733.8	2.95802	0.00214462
73.6354	0.148	1099.36	248.625	0.0522316	0	26.4062	89570.9	2.95802	0.0023365
218.49	2.17975	1099.36	242.281	0.0637266	1.375	35.0312	89399.1	3.14723	0.00195875
179.536	2.518	1099.36	257.344	0.0288754	0	32.8438	89066.9	3.14723	0.00213519
67.3574	0.0904334	1099.36	269.031	0.0561631	4.125	31.9062	89109.4	3.14723	0.00169497
65.0396	0.1685	1099.36	307.438	0.0618446	0	31.3125	88927.2	3.14723	0.00345344
59.8988	0.4	1099.36	317.562	0.0459841	0.625	27.7812	88914.7	3.65831	0.00467187
87.4097	0.345778	1099.36	288.594	0.104951	6.625	41.8438	88992.8	3.65831	0.00332609
82.3399	0.445	1099.36	306.562	0.117388	1.75	45.5	88876.6	3.65831	0.00307841
226.064	1.94925	1099.36	322.5	0.120145	9.375	43.7188	88657.2	3.65831	0.00414444
123.745	0.228333	1099.36	336.062	0.140666	10.125	44.25	88645	4.32631	0.00500072
127.689	0.1975	1099.36	324.469	0.0977162	2.875	42.7812	88812.5	4.32631	0.00454966
161.529	0.5585	1099.36	314.594	0.138867	1.375	48.875	88923.8	4.32631	0.00416537
68.3542	0.259	1099.36	335.312	0.164131	5.5	49.7188	88523.8	4.32631	0.00454937
87.1667	0.254867	1099.36	361.406	0.186266	34.75	53.0625	88562.8	4.11635	0.00564497
99.3889	0.143667	1099.36	359	0.159541	41.375	48.625	88270.3	4.11635	0.00506278
68.9226	0.215262	1099.36	347.719	0.176395	19.75	48.5312	88575.6	4.11635	0.00573216
76.6548	0.194278	1099.36	364.094	0.134354	22.25	48.5625	87981.9	4.11635	0.00519116
96.9183	0.174933	1099.36	359.719	0.175132	19.75	52.25	88399.7	3.90258	0.00607509
87.2089	0.216167	1099.36	359.719	0.20712	6.625	42.3125	88172.8	3.90258	0.00579634
55.6095	0.253	1099.36	366.719	0.223869	23.875	46.125	88292.8	3.90258	0.00566256
62.1533	0.280083	1099.36	372.5	0.163298	9.75	38.9375	88422.8	3.90258	0.00778081
57.7171	0.2205	1099.36	364.562	0.148558	5	42.0312	88515.9	3.0941	0.00717728
50.9975	0.210833	1099.36	361.219	0.154746	1.5	37.8125	88702.8	3.0941	0.00732466
51.0279	0.247556	1099.36	365.625	0.182747	1.75	34.0938	88982.5	3.0941	0.00813059
47.3281	0.167139	1099.36	346.188	0.223749	4	33.5	88905	3.37294	0.00692056
49.2679	0.187833	1099.36	334.75	0.203857	30.375	37.3438	88966.9	3.37294	0.00612513
42.2328	0.155875	1099.36	325.531	0.193102	18.75	37.5	88951.2	3.37294	0.00503197
57.1407	0.201917	1099.36	315.219	0.161626	7.75	30.9062	89006.2	3.37294	0.00440528
61.1607	0.153571	1099.36	273.438	0.207149	16.375	34.0625	89498.8	3.45139	0.00307125
82.4033	0.144952	1099.36	273.344	0.10235	17.5	30.4688	89060	3.45139	0.00191397
80.0894	0.18575	1099.36	262.062	0.0921274	2.75	25.5938	89392.5	3.45139	0.00203594
104.237	0.258917	1099.36	257.094	0.144074	0	24.4062	89956.9	3.45139	0.00296866
93.4762	0.130333	1099.36	237.719	0.150656	0	22.9062	89814.4	2.78674	0.00183603
122.958	0.16925	1099.36	244.844	0.0457038	0	20.25	89175.6	2.78674	0.00197184
80.1131		1099.36	234.031	0.0789247	0	16.9062	90136.2	2.78674	0.00211734
143.611	0.228917	1099.36	231.594	0.0952623	0	17.3438	90130.3	2.78674	0.00225063
162.55	0.1972	1099.36	244.719	0.0740407	0	14.9688	89441.2	2.49432	0.00216416
154.804	0.268083	1099.36	225.906	0.0938637	0	16.3438	89789.1	2.49432	0.00204191
121.935	0.2373	1099.36	217.469	0.0697024	0	15.1562	89994.4	2.49432	0.00172581
115.46	0.238417	1099.36	215.062	0.0749843	0	16.3438	89754.1	2.49432	0.00170972
98.6404	0.245	1099.36	200.844	0.115807	0	25.0938	90030.6	2.60697	0.00147881
117.276	0.221	1099.36	199.031	0.0525177	0	28.4688	90166.9	2.60697	0.00143253
129.941	0.143167	1099.36	237.531	0.0589088	0	20.75	89637.5	2.60697	0.00214341
92.9722		1099.36	252.219	0.0148866	0	20.5625	89499.1	2.60697	0.00254634
145.823	0.182	1099.36	237.875	0.053556	0	24.0312	89733.8	2.95802	0.00214462
72.6845	0.156167	1099.36	248.625	0.0685487	0	26.4062	89570.9	2.95802	0.0023365
205.761	1.46064	1487.46	247.938	0.080126	5	61.1875	85187.2	3.54951	0.00229575
401.613	1.71483	1487.46	257.438	0.0264742	0	59.6875	84831.9	3.54951	0.00248738
91.4464	0.0296667	1487.46	266.719	0.0643762	2.375	59.5	84936.9	3.54951	0.00234456
45.2568	0.271833	1487.46	297.25	0.067221	2.75	66.9688	84795	3.54951	0.00354009
77.2583	0.243333	1487.46	307.938	0.0927188	5.75	51.375	84813.4	5.01519	0.00581294
90.9097	0.224375	1487.46	283.5	0.16612	21.375	75.2812	84876.9	5.01519	0.00391712
107.944	0.482333	1487.46	309.156	0.0869301	2.375	67.6562	84848.4	5.01519	0.00377303
272.709	1.19058	1487.46	313.531	0.143442	7	81.25	84650.6	5.01519	0.00396369
34.4772	0.160167	1487.46	330.375	0.176429	44.625	76.7812	84608.4	5.68397	0.00399362
202.979	0.211	1487.46	326.094	0.20376	32.875	69.25	84782.5	5.68397	0.00532688
164.273	1.056	1487.46	323.312	0.100836	9.125	76.2812	84835.6	5.68397	0.00569572
29.1167	0.256167	1487.46	326.531	0.251146	50.375	89.6562	84510.3	5.68397	0.00385244
30.3119	0.4383	1487.46	344.5	0.208693	85.25	91.7188	84675.9	4.83652	0.00573709
38.5476	0.116	1487.46	343.719	0.128102	76	86.875	84390.6	4.83652	0.00568941
24.875	0.169619	1487.46	338.75	0.280159	144.125	91.4375	84575	4.83652	0.00488262
11.3542	0.123938	1487.46	358.188	0.240938	183.375	88.5625	84121.6	4.83652	0.00583497
22.463	0.220667	1487.46	353.625	0.267221	214.5	86.5	84469.7	4.63911	0.00576384
25.0417	0.237567	1487.46	340.469	0.203241	241.375	84.5625	84269.7	4.63911	0.00440525
29.1567	0.227667	1487.46	355.875	0.20294	276.25	82.5	84406.6	4.63911	0.00578028
22.2287	0.105833	1487.46	351.812	0.218839	293.875	73.3125	84524.1	4.63911	0.00711981
19.2859	0.209333	1487.46	349.656	0.248571	261	77.5	84579.4	3.52455	0.00735394
8.32272	0.138375	1487.46	332.812	0.200169	209.75	80.1562	84700.9	3.52455	0.00655244
12.1583	0.1775	1487.46	339.469	0.197463	155.625	56.1562	85031.9	3.52455	0.00697663
12.4219	0.1523	1487.46	324.844	0.25998	153.125	73.6875	84888.8	3.62826	0.00644178
12.0888	0.181938	1487.46	326.125	0.292458	181	67.1875	84983.8	3.62826	0.006856
16.9441	0.162125	1487.46	310.938	0.237659	212.5	69.5312	84992.8	3.62826	0.00444088
33.5435	0.259738	1487.46	307.594	0.221357	218.375	62.4375	84937.8	3.62826	0.00458516
35.7824	0.16175	1487.46	270.125	0.219272	233.25	63.4062	85286.9	4.39242	0.00300869
25.6667	0.139595	1487.46	270.594	0.176742	243.625	56.5	84953.1	4.39242	0.00246681
77.1656	0.277762	1487.46	261.969	0.166333	233.75	49.8125	85112.5	4.39242	0.00252309
76.6228	0.334767	1487.46	263.312	0.110307	221.875	43.6875	85663.8	4.39242	0.00301297
49.9226	0.135929	1487.46	225.906	0.15599	212.25	47.875	85604.4	4.21072	0.00145956
33.2885	0.127583	1487.46	258.281	0.109005	126	37.1875	84932.8	4.21072	0.00208819
63.1719		1487.46	240.625	0.0130282	59.375	39.125	85710	4.21072	0.00259678
60.6358		1487.46	231.844	0.106277	12.875	40.2812	85788.4	4.21072	0.00290181
82.2536	0.218833	1487.46	240.125	0.0919991	0	31.125	85123.1	2.71985	0.00287041
93.1131	0.346042	1487.46	226.75	0.0918575	0	32	85415.6	2.71985	0.00258509
67.5926	0.210333	1487.46	224.094	0.0668916	0	29.4062	85545.9	2.71985	0.00200947
68.9425	0.168458	1487.46	224.688	0.051388	0	31.625	85340.6	2.71985	0.00215134
36.0318		1487.46	202.219	0.0196853	0	48.4062	85589.1	2.11678	0.00159366
24.474		1487.46	201.656	0.0207363	0	61.375	85719.4	2.11678	0.00152281
29.6827		1487.46	250.656	0.0117266	0	58.9062	85260.3	2.11678	0.00249144
41.4635		1487.46	258.281	0.00954697	0	58.2812	85117.2	2.11678	0.00285594
76.7857		1487.46	239.469	0.0697907	0.375	49.2188	85400	3.17388	0.00267422
85.1181	0.02	1487.46	252.219	0.0484949	0	44.6562	85255.9	3.17388	0.00270581
821.294	1.37175	1550.94	251.062	0.0602164	2.125	64.5938	84654.4	3.50981	0.00255703
615.85	2.10825	1550.94	261.531	0.0257143	0	61.3125	84318.1	3.50981	0.00263341
102.459	0.02475	1550.94	268.938	0.0445855	1.75	62.7188	84404.4	3.50981	0.00257809
94.5069	0.228375	1550.94	301.688	0.0435496	3.875	69.2812	84260	3.50981	0.00376741
47.875	0.257	1550.94	311.656	0.0489258	2.625	54.375	84288.4	4.79777	0.00588834
136.451	0.259	1550.94	287.312	0.0962876	6	77.4062	84342.8	4.79777	0.00420009
139.5	0.45975	1550.94	315.875	0.0651169	0.25	67.4062	84322.2	4.79777	0.004154
230.496	1.17225	1550.94	314.656	0.133694	3.5	86.9375	84118.8	4.79777	0.00400341
60.255	0.1699	1550.94	335.094	0.0825867	15	79.375	84087.2	5.14914	0.00442219
179.989	0.116333	1550.94	330.406	0.0870608	3.75	67.4062	84270.9	5.14914	0.00570525
190.661	0.718	1550.94	328.469	0.0855379	1	76.125	84312.5	5.14914	0.00593975
43.75	0.185417	1550.94	330.25	0.124704	28.625	92.2188	83980.6	5.14914	0.00420962
47.6458	0.497033	1550.94	347.688	0.134192	46	92.7812	84154.4	4.45919	0.00565147
58.3111	0.155333	1550.94	345.906	0.0875774	29	87.7188	83885.9	4.45919	0.00612428
40.2361	0.220786	1550.94	336.594	0.117014	28.375	95.75	84060	4.45919	0.00519072
26.8385	0.206437	1550.94	360.656	0.138665	59.875	89.5938	83612.8	4.45919	0.00574897
43.0222	0.2555	1550.94	358.812	0.124138	77.875	84.875	83957.8	4.33482	0.00554816
35.5179	0.268944	1550.94	341.781	0.133156	93.25	86.7188	83755.6	4.33482	0.00442966
58.9905	0.252952	1550.94	358.031	0.0966602	117.375	83.6875	83900	4.33482	0.00619641
42.8353	0.244222	1550.94	355.125	0.119436	121.5	74.375	84021.2	4.33482	0.00693284
31.7495	0.211556	1550.94	353.438	0.117102	77.375	80.5625	84060.6	3.44091	0.0069825
26.2319	0.152533	1550.94	338.344	0.12921	14.875	80.75	84186.2	3.44091	0.00643213
30.0357	0.20125	1550.94	345	0.098752	2.125	56.1875	84521.9	3.44091	0.00699125
27.1875	0.1949	1550.94	328.094	0.134452	16	76.3125	84365.3	3.37993	0.00632412
28.2489	0.186571	1550.94	327.281	0.158513	41.75	71	84465.3	3.37993	0.00717022
55.6824	0.169071	1550.94	313	0.133277	75.625	72.1562	84468.4	3.37993	0.00469897
84.3155	0.293881	1550.94	311.75	0.113377	81.75	65.0625	84421.6	3.37993	0.00509622
75.0069	0.194738	1550.94	273.812	0.140635	95.375	66.4062	84755	3.88188	0.00315697
83.5032	0.18531	1550.94	271.438	0.0882511	107.25	60.25	84431.6	3.88188	0.00275631
120.91	0.316881	1550.94	261.812	0.109873	95.375	53.2188	84588.4	3.88188	0.00276594
143.526	0.363633	1550.94	269.438	0.0743928	81	43.0938	85152.8	3.88188	0.00332062
137.78	0.191786	1550.94	228.469	0.107018	71.75	50.6562	85079.1	3.5477	0.00156419
99.1878	0.145524	1550.94	261.344	0.0704692	10.875	38.2188	84406.9	3.5477	0.00221447
96.2202		1550.94	245.938	0.0114616	0	64.4062	85230.3	3.5477	0.00238231
213.985		1550.94	231.719	0.0735443	0	59.4062	85302.5	3.5477	0.00264459
140.719	0.2341	1550.94	243.781	0.0729496	0	33.125	84638.1	2.40684	0.00301375
184.642	0.379533	1550.94	247	0.0702717	0	31.1562	84940.3	2.40684	0.002931
117.493	0.212375	1550.94	228.062	0.0458985	0	30.75	85058.8	2.40684	0.00215878
121.65	0.187125	1550.94	233.406	0.0344455	0	32.8438	84830.6	2.40684	0.00229309
120.878		1550.94	206.812	0.00718523	0	73.875	85074.1	1.97896	0.00146103
150.62		1550.94	217.688	0.0133837	0	84.6875	85233.8	1.97896	0.00157666
113.983		1550.94	259.031	0.00768016	0	75.8125	84774.4	1.97896	0.00248816
93.1719		1550.94	279.406	0.0211885	0	75.4375	84628.8	1.97896	0.00300219
151.696		1550.94	248.094	0.0307445	0.25	59.1875	84901.2	3.15471	0.00273666
155.368	0.021	1550.94	255.094	0.0288025	0	48.75	84753.4	3.15471	0.00280806
1249.59	1.4081	1346.53	259.156	0.0715189	2.125	66.2188	86780.3	3.45045	0.00274294
1316.2	1.72267	1346.53	263.219	0.01512	0	64.375	86477.8	3.45045	0.00267337
186.698	0.0368333	1346.53	273.312	0.0366099	2.25	66.0938	86560	3.45045	0.00258872
137.937	0.209625	1346.53	305.062	0.0481828	2.875	71.3125	86364.7	3.45045	0.00379375
371.493	0.233667	1346.53	314.281	0.0635162	2.125	58.0938	86413.4	4.67495	0.00585812
172.22	0.3691	1346.53	294.344	0.0925757	5.875	79.5	86442.5	4.67495	0.00424922
220.834	0.377	1346.53	317.75	0.0734015	0	73.1562	86430	4.67495	0.00425953
527.129	0.842667	1346.53	319.656	0.132707	6.25	90.375	86178.8	4.67495	0.00398656
110.231	0.107083	1346.53	340.281	0.107109	13.25	81.5312	86151.9	4.8941	0.00480541
377.231	0.132708	1346.53	334.469	0.117597	3.125	73.0312	86362.5	4.8941	0.00588919
315.013	0.96925	1346.53	333.156	0.127607	0.75	81.4375	86390.3	4.8941	0.00587597
80.8125	0.1377	1346.53	336.812	0.150771	25.625	94	86033.8	4.8941	0.00445831
87.4714	0.419	1346.53	356.344	0.157337	37.75	92.6562	86191.2	4.30528	0.00561459
95.5041	0.155433	1346.53	352.312	0.102473	23.75	93.3438	85922.2	4.30528	0.006214
80.75	0.187476	1346.53	339.656	0.180181	21.75	98.5312	86117.8	4.30528	0.0053985
56.744	0.146875	1346.53	365.75	0.170132	44.25	92.1562	85637.8	4.30528	0.00579609
72.6478	0.226643	1346.53	365.156	0.162766	56.75	85.5938	85991.2	4.20201	0.00547456
56.9761	0.261833	1346.53	348.5	0.164671	67	87.8438	85790.3	4.20201	0.00467178
72.55	0.231214	1346.53	364.219	0.156849	87.375	85.8438	85926.2	4.20201	0.00649581
55.179	0.205	1346.53	359.438	0.139177	89.125	77.4062	86059.4	4.20201	0.00672991
52.7148	0.199583	1346.53	362.312	0.1528	48.125	80.4688	86103.8	3.37779	0.00670669
43.1532	0.140708	1346.53	346.906	0.171755	2.375	81.25	86253.1	3.37779	0.00621394
54.0625	0.18575	1346.53	351.094	0.115027	0.875	57.1875	86594.7	3.37779	0.00691434
43.8906	0.1518	1346.53	336	0.161124	10.125	76.5938	86430	3.24677	0.00628544
42.1386	0.169976	1346.53	333.688	0.181702	31.875	74.0625	86535.3	3.24677	0.00724369
65.5278	0.134452	1346.53	323.062	0.178516	62.25	71.8438	86530	3.24677	0.00493969
99.1362	0.264048	1346.53	318.531	0.144049	67.5	66.9375	86499.4	3.24677	0.00531659
99.2582	0.159452	1346.53	282.125	0.166795	78.875	67.7812	86864.7	3.69133	0.00340341
103.287	0.151354	1346.53	276.219	0.128132	87.625	62.25	86538.1	3.69133	0.00291691
139.372	0.309452	1346.53	259.688	0.1043	75	56.4688	86754.1	3.69133	0.00294013
168.27	0.337867	1346.53	272.5	0.08974	60	44	87307.8	3.69133	0.00346706
146.792	0.161444	1346.53	235.625	0.123842	50.75	51.5938	87248.8	3.35826	0.00166687
129.366	0.100548	1346.53	263.062	0.1034	6.75	40.4688	86550.3	3.35826	0.00221372
120.104		1346.53	246.375	0.0115294	0	77.4375	87500.3	3.35826	0.00238675
189.39		1346.53	234.531	0.045506	0	66.625	87517.2	3.35826	0.00252791
180.658	0.2519	1346.53	242.094	0.0727515	0	36.0625	86844.1	2.33842	0.00302637
201.276	0.371167	1346.53	259.375	0.0232742	0	30.4688	87185.3	2.33842	0.00313856
135.304	0.246167	1346.53	233.656	0.0446813	0	31.3125	87300.9	2.33842	0.00228562
154.367	0.212458	1346.53	235.531	0.0436205	0	35.8125	87070.3	2.33842	0.00239622
135.994		1346.53	207.844	0.00943464	0	81.6875	87357.2	2.00426	0.00154606
170.375		1346.53	222.406	0.0110914	0	91.2812	87523.4	2.00426	0.00169756
132.511		1346.53	262.062	0.00980973	0	88.9688	87031.9	2.00426	0.00248766
120.682		1346.53	284.344	0.000735329	0	88.875	86879.4	2.00426	0.00307431
167.208	0.309	1346.53	249.125	0.0259687	0.25	66.2188	87135.3	3.17685	0.00277063
189.756	0.014	1346.53	253.562	0.0307089	0	55.9688	86974.4	3.17685	0.00287662
920.337	1.36146	1346.53	259.156	0.150866	2.125	66.2188	86780.3	3.45045	0.00274294
937.413	1.6295	1346.53	263.219	0.03109	0	64.375	86477.8	3.45045	0.00267337
99.6692	0.03125	1346.53	273.312	0.109337	2.75	66.0938	86560	3.45045	0.00258872
81.6621	0.19	1346.53	305.062	0.0964621	3.625	71.3125	86364.7	3.45045	0.00379375
183.393	0.3127	1346.53	314.281	0.110942	2.875	58.0938	86413.4	4.67495	0.00585812
139.052	0.3916	1346.53	294.344	0.189145	8	79.5	86442.5	4.67495	0.00424922
222.655	0.45	1346.53	317.75	0.101619	0	73.1562	86430	4.67495	0.00425953
21.8207	1.14483	1346.53	319.656	0.281532	10	90.375	86178.8	4.67495	0.00398656
52.6205	0.160167	1346.53	340.281	0.172757	19	81.5312	86151.9	4.8941	0.00480541
127.577	0.224333	1346.53	334.469	0.215282	6.125	73.0312	86362.5	4.8941	0.00588919
227.287	0.969417	1346.53	333.156	0.234801	1.875	81.4375	86390.3	4.8941	0.00587597
36.2798	0.1768	1346.53	336.812	0.300771	34.75	94	86033.8	4.8941	0.00445831
49.2656	0.571833	1346.53	356.344	0.3293	56.125	92.6562	86191.2	4.30528	0.00561459
58.9497	0.059	1346.53	352.312	0.259436	28.125	93.3438	85922.2	4.30528	0.006214
45.2583	0.1222	1346.53	339.656	0.494051	26	98.5312	86117.8	4.30528	0.0053985
24.9323	0.119438	1346.53	365.75	0.566437	49.875	92.1562	85637.8	4.30528	0.00579609
41.1959	0.1335	1346.53	365.156	0.44072	63.5	85.5938	85991.2	4.20201	0.00547456
35.6694	0.220625	1346.53	348.5	0.443776	78.125	87.8438	85790.3	4.20201	0.00467178
59.4452	0.197286	1346.53	364.219	0.520835	102.75	85.8438	85926.2	4.20201	0.00649581
36.2352	0.176778	1346.53	359.438	0.445868	107.375	77.4062	86059.4	4.20201	0.00672991
30.3139	0.162056	1346.53	362.312	0.543853	66.875	80.4688	86103.8	3.37779	0.00670669
27.4038	0.1176	1346.53	346.906	0.452114	10.875	81.25	86253.1	3.37779	0.00621394
29.0134	0.156	1346.53	351.094	0.276565	1.75	57.1875	86594.7	3.37779	0.00691434
24.2656	0.1212	1346.53	336	0.543007	15.375	76.5938	86430	3.24677	0.00628544
27.1574	0.13131	1346.53	333.688	0.541829	40.375	74.0625	86535.3	3.24677	0.00724369
56.0848	0.115333	1346.53	323.062	0.466321	77.25	71.8438	86530	3.24677	0.00493969
48.5	0.234952	1346.53	318.531	0.359712	88.25	66.9375	86499.4	3.24677	0.00531659
	0.0705714	1346.53	282.125	0.3102	103.75	67.7812	86864.7	3.69133	0.00340341
	0.0684049	1346.53	276.219	0.201747	116.75	62.25	86538.1	3.69133	0.00291691
140.361	0.282722	1346.53	259.688	0.192751	105	56.4688	86754.1	3.69133	0.00294013
177.526	0.306367	1346.53	272.5	0.147372	92.625	44	87307.8	3.69133	0.00346706
149.66	0.130667	1346.53	235.625	0.242419	85.25	51.5938	87248.8	3.35826	0.00166687
126.507	0.0750953	1346.53	263.062	0.178923	27.625	40.4688	86550.3	3.35826	0.00221372
105.734		1346.53	246.375	0.0258443	0	77.4375	87500.3	3.35826	0.00238675
215.561	0.216	1346.53	234.531	0.155561	0	66.625	87517.2	3.35826	0.00252791
187.275	0.212333	1346.53	242.094	0.152456	0	36.0625	86844.1	2.33842	0.00302637
240.483	0.390367	1346.53	259.375	0.111904	0	30.4688	87185.3	2.33842	0.00313856
140.522	0.2305	1346.53	233.656	0.0927082	0	31.3125	87300.9	2.33842	0.00228562
161.625	0.229625	1346.53	235.531	0.0693119	0	35.8125	87070.3	2.33842	0.00239622
103.365		1346.53	207.844	0.0228606	0	81.6875	87357.2	2.00426	0.00154606
156.5		1346.53	222.406	0.0198562	0	91.2812	87523.4	2.00426	0.00169756
115.865		1346.53	262.062	0.0129552	0	88.9688	87031.9	2.00426	0.00248766
115.764		1346.53	284.344	0.0143082	0	88.875	86879.4	2.00426	0.00307431
164.234		1346.53	249.125	0.0676022	0.375	66.2188	87135.3	3.17685	0.00277063
164.881	0.034	1346.53	253.562	0.0642954	0	55.9688	86974.4	3.17685	0.00287662
278.121	0.936333	1399.26	258.562	0.0856483	15.625	70.6562	86045	4.26317	0.00270656
274.915	2.044	1399.26	255.406	0.0594267	5.25	68.3438	85696.9	4.26317	0.00226
114.112	0.12	1399.26	261.688	0.010868	4	73.9062	85789.7	4.26317	0.00210184
61.3283	0.199625	1399.26	287.781	0.056277	16.125	77	85605	4.26317	0.00287397
145.495	0.992583	1399.26	311.875	0.0876717	0	74.5625	85567.5	4.97999	0.00614
240.854	0.898567	1399.26	302.25	0.112436	1.625	76.5	85633.1	4.97999	0.00386062
154.869	0.62825	1399.26	315.844	0.158699	0	82.0625	85590.3	4.97999	0.00408137
179.736	0.919	1399.26	310.125	0.128791	26.125	94.5	85462.8	4.97999	0.00326428
94.8889	0.209375	1399.26	328.594	0.150695	35.5	89.2812	85401.9	5.01794	0.00417306
478.091	1.4375	1399.26	325.312	0.157843	4.5	89.3438	85580	5.01794	0.00451897
173.21	0.65575	1399.26	317.719	0.139741	2.375	91.875	85614.1	5.01794	0.00443866
74.5	0.20369	1399.26	333.312	0.125102	12.875	94.75	85312.5	5.01794	0.00371397
77.2153	0.396	1399.26	367.969	0.178081	3.75	81.5312	85470.6	4.9408	0.00588256
112.217	0.635667	1399.26	363.031	0.118198	4.875	99.5625	85107.8	4.9408	0.00572656
102.738	0.23175	1399.26	351.25	0.147949	19.375	90.2812	85375.9	4.9408	0.00464463
104.488	0.926458	1399.26	368.031	0.157968	30.625	90.6562	84906.2	4.9408	0.00548316
100.444	0.349222	1399.26	366.312	0.154645	28.875	93.8125	85229.1	5.16695	0.00542022
107.947	0.1825	1399.26	364.719	0.162038	34.25	80.125	85133.8	5.16695	0.00578028
79.7972	0.4208	1399.26	354.5	0.178995	59.375	96.8125	85131.2	5.16695	0.00453037
88.7562	0.8692	1399.26	366.406	0.15421	65.75	78.3125	85284.4	5.16695	0.00685737
69.25		1399.26	384.375	0.113956	50.875	51.5938	85485.3	3.84666	0.00970038
19.5448	0.113	1399.26	374.875	0.0709986	5.625	49.8125	85619.7	3.84666	0.00969234
13.8122		1399.26	371.594	0.0950711	0.5	57.0938	85932.5	3.84666	0.00980659
15.5833	0.174375	1399.26	349.719	0.12787	4.5	61.4375	85788.4	3.88571	0.00846791
32.2373	0.1804	1399.26	348.406	0.177035	16.375	66.125	85819.1	3.88571	0.00698469
27.7167	0.0971429	1399.26	318.125	0.203436	39.375	74.7188	85838.1	3.88571	0.00458847
	0.257	1399.26	309.125	0.169665	53.875	74.625	85744.1	3.88571	0.00502897
	0.30325	1399.26	295.406	0.123679	63.875	64.2188	86115.9	3.95222	0.00293922
53.6508	0.113937	1399.26	276.156	0.158945	79.5	67.375	85783.4	3.95222	0.00293912
100.117	0.486917	1399.26	275.688	0.100428	75	58.1875	85936.6	3.95222	0.00410247
86.16	0.352452	1399.26	250.75	0.129897	77.125	56.625	86536.9	3.95222	0.00243284
64.3819	0.138167	1399.26	243.438	0.121122	80	52.7188	86501.9	4.06464	0.00182841
44.8926	0.122714	1399.26	253.281	0.0979133	71.375	51.4062	85824.4	4.06464	0.00261497
100.219	0.481667	1399.26	235.281	0.0490415	55.625	46.0938	86644.7	4.06464	0.00255753
70.5418	0.1461	1399.26	235.031	0.0764642	48.5	42.6875	86689.7	4.06464	0.00179009
58.6448	0.1978	1399.26	222.312	0.0750781	38.625	45.0938	86020	3.42869	0.00252044
49.4208	0.176929	1399.26	230.531	0.0741064	27.75	43.0938	86341.9	3.42869	0.00284331
52.2293	0.197667	1399.26	226.188	0.0664708	5.375	38.2812	86453.4	3.42869	0.00211525
52.8414	0.170917	1399.26	233.938	0.0575371	0	40.4062	86241.2	3.42869	0.00235016
48.8424		1399.26	206.906	0.0273659	0	84.5	86534.4	3.37034	0.00178078
50.9115		1399.26	204.062	0.0641745	0	96.9375	86679.7	3.37034	0.00167222
38.0096	0.141	1399.26	230.125	0.0578082	0	50.8438	86178.1	3.37034	0.00211084
35.4115	0.19125	1399.26	245.188	0.0436197	0	49.1875	86018.1	3.37034	0.00277984
43.1562	0.087	1399.26	232.594	0.0555494	0	56.2188	86327.5	4.16164	0.002668
56.9107		1399.26	256.719	0.0308728	0	58.0625	86123.4	4.16164	0.00299222
228.929	0.890312	1399.26	258.562	0.0948504	15.625	70.6562	86045	4.26317	0.00270656
319.899	2.08767	1399.26	255.406	0.0477758	5.25	68.3438	85696.9	4.26317	0.00226
138.336	0.23275	1399.26	261.688	0.0131797	4	73.9062	85789.7	4.26317	0.00210184
	0.19125	1399.26	287.781	0.0674944	16.125	77	85605	4.26317	0.00287397
171.333	1.03483	1399.26	311.875	0.0883419	0	74.5625	85567.5	4.97999	0.00614
172.875	0.677195	1399.26	302.25	0.119592	1.625	76.5	85633.1	4.97999	0.00386062
146.434	0.594625	1399.26	315.844	0.161586	0.125	82.0625	85590.3	4.97999	0.00408137
253.827	0.925767	1399.26	310.125	0.149354	26.125	94.5	85462.8	4.97999	0.00326428
114.819	0.18675	1399.26	328.594	0.177923	34.875	89.2812	85401.9	5.01794	0.00417306
556.764	0.6845	1399.26	325.312	0.151848	4.5	89.3438	85580	5.01794	0.00451897
207.128	0.606375	1399.26	317.719	0.143709	2.375	91.875	85614.1	5.01794	0.00443866
85.7865	0.200405	1399.26	333.312	0.128206	13.875	94.75	85312.5	5.01794	0.00371397
71.6033	0.4075	1399.26	367.969	0.180144	4.875	81.5312	85470.6	4.9408	0.00588256
101.481	0.488417	1399.26	363.031	0.137732	4.875	99.5625	85107.8	4.9408	0.00572656
69.3264	0.224625	1399.26	351.25	0.13952	19.375	90.2812	85375.9	4.9408	0.00464463
117.266	0.673667	1399.26	368.031	0.160533	29.25	90.6562	84906.2	4.9408	0.00548316
100.799	0.330833	1399.26	366.312	0.153752	25.625	93.8125	85229.1	5.16695	0.00542022
132.4	0.1585	1399.26	364.719	0.135641	30.25	80.125	85133.8	5.16695	0.00578028
70.6512	0.406083	1399.26	354.5	0.165472	55.375	96.8125	85131.2	5.16695	0.00453037
104.543	0.843067	1399.26	366.406	0.165646	61.75	78.3125	85284.4	5.16695	0.00685737
50.583		1399.26	384.375	0.112253	46.875	51.5938	85485.3	3.84666	0.00970038
22.9931	0.1735	1399.26	374.875	0.0903667	5.125	49.8125	85619.7	3.84666	0.00969234
19.9291		1399.26	371.594	0.0936491	0.5	57.0938	85932.5	3.84666	0.00980659
18.7292	0.125722	1399.26	349.719	0.154614	5	61.4375	85788.4	3.88571	0.00846791
35.5358	0.195375	1399.26	348.406	0.158994	16.375	66.125	85819.1	3.88571	0.00698469
30.2639	0.12131	1399.26	318.125	0.226679	39.375	74.7188	85838.1	3.88571	0.00458847
67.6307	0.27625	1399.26	309.125	0.163852	53.875	74.625	85744.1	3.88571	0.00502897
84.0074	0.3579	1399.26	295.406	0.13182	63.875	64.2188	86115.9	3.95222	0.00293922
58.7123	0.121188	1399.26	276.156	0.174652	80.75	67.375	85783.4	3.95222	0.00293912
117.549	0.493167	1399.26	275.688	0.111427	77	58.1875	85936.6	3.95222	0.00410247
116.438	0.370643	1399.26	250.75	0.14018	79.125	56.625	86536.9	3.95222	0.00243284
61.2083	0.154833	1399.26	243.438	0.140305	81.5	52.7188	86501.9	4.06464	0.00182841
66.8822	0.11931	1399.26	253.281	0.105687	72.375	51.4062	85824.4	4.06464	0.00261497
125.161	0.265667	1399.26	235.281	0.058198	60.125	46.0938	86644.7	4.06464	0.00255753
115.68	0.1567	1399.26	235.031	0.0685408	53.5	42.6875	86689.7	4.06464	0.00179009
96.8857	0.2145	1399.26	222.312	0.0774656	43.625	45.0938	86020	3.42869	0.00252044
59.2609	0.187667	1399.26	230.531	0.0814791	32.75	43.0938	86341.9	3.42869	0.00284331
77.0349	0.1715	1399.26	226.188	0.0668277	6.625	38.2812	86453.4	3.42869	0.00211525
81.8854	0.166583	1399.26	233.938	0.0674498	0	40.4062	86241.2	3.42869	0.00235016
59.3816		1399.26	206.906	0.0213598	0	84.5	86534.4	3.37034	0.00178078
87		1399.26	204.062	0.0739617	0	96.9375	86679.7	3.37034	0.00167222
61.6851	0.077	1399.26	230.125	0.0517291	0	50.8438	86178.1	3.37034	0.00211084
54.4583	0.139	1399.26	245.188	0.0560411	0	49.1875	86018.1	3.37034	0.00277984
65.6181	0.08775	1399.26	232.594	0.0527163	0	56.2188	86327.5	4.16164	0.002668
74.375	0.399	1399.26	256.719	0.0320145	0	58.0625	86123.4	4.16164	0.00299222
38.0136	0.105333	539.488	256.031	0.112899	3.75	61.8438	95976.2	5.18178	0.00351497
30.8815	0.069	539.488	284.938	0.138372	8.75	36.6562	95246.9	5.18178	0.00403191
20.2076	0.0655	539.488	276.125	0.0607106	6.125	44.8438	95608.4	5.18178	0.00349278
28.2108	0.0875	539.488	306.781	0.13965	1.5	41.1875	95386.6	5.18178	0.00526506
21.6964	0.387	539.488	301.125	0.119035	4.375	48.6562	95538.8	4.29799	0.00458388
20.5556	0.0630138	539.488	284.719	0.146246	37	59.0938	95485.3	4.29799	0.00368675
19.1775	0.164805	539.488	310.312	0.230382	51	58.9375	95503.4	4.29799	0.00525778
21.428	0.15875	539.488	323.438	0.315118	3.25	55.0625	95280.9	4.29799	0.00602759
13.7708	0.11725	539.488	325.188	0.102792	3.5	57.7188	95272.5	4.97998	0.00613941
17.9121	0.215583	539.488	323.688	0.331809	5.875	59.7188	95310	4.97998	0.00596375
20.2217	0.173945	539.488	309.469	0.307774	32.625	69.9688	95231.6	4.97998	0.00488113
21.3929	0.149833	539.488	336.094	0.250144	24.125	66.2812	95026.6	4.97998	0.00620009
24.8264	0.107444	539.488	359	0.306986	73.5	69.625	94990	3.99853	0.00704791
22.5083	0.170875	539.488	369.75	0.196526	22.875	56.6875	94867.5	3.99853	0.00903512
21.125	0.120333	539.488	341.75	0.253228	9.125	60.625	95107.2	3.99853	0.00657084
22.6458	0.135	539.488	364.344	0.319817	0.75	58.6875	94497.2	3.99853	0.00779856
20.3419	0.0976667	539.488	357.969	0.293671	24.25	72.5938	94775.9	3.36176	0.00695341
17.3333	0.125767	539.488	358.125	0.324916	4.625	63.0312	94629.1	3.36176	0.00756178
29.4417	0.189967	539.488	368.062	0.212979	15.125	60.4688	94718.4	3.36176	0.00811184
29.5833	0.155833	539.488	361.969	0.242005	11.375	49.25	94940.9	3.36176	0.00911831
20.7386	0.146071	539.488	355.094	0.347916	53.375	65.0625	94768.1	3.41407	0.0073405
22.0924	0.16469	539.488	346.594	0.290483	104	58.3125	95047.5	3.41407	0.00684225
28.31	0.15575	539.488	349.688	0.305055	159.875	57.9062	95079.1	3.41407	0.00652741
29.4375	0.135381	539.488	345.625	0.291809	191	52.9062	95045.3	3.69386	0.0065315
29.1012	0.160405	539.488	340.781	0.348019	177.875	51.2812	95206.9	3.69386	0.00624178
29.4885	0.165344	539.488	332.688	0.293111	215	47.5938	95238.8	3.69386	0.00540759
25.0833	0.207333	539.488	320.25	0.13616	160.875	36.0625	95515.6	3.69386	0.00532919
31.3544	0.187714	539.488	271.031	0.283604	135.5	44.9062	96099.4	4.13068	0.00369259
56.6234	0.20825	539.488	288.312	0.104178	16.625	39.4375	95601.9	4.13068	0.00364828
33.0595	0.2315	539.488	244.531	0.100318	0.75	34.0625	96555.6	4.13068	0.00249109
44.6503	0.1616	539.488	265.125	0.172136	2.75	32.2812	96109.1	4.13068	0.00308944
48.0298	0.190958	539.488	250.812	0.111528	0	28.4375	96558.8	5.07311	0.00263934
31.3514	0.164	539.488	260.969	0.0012622	0	33.5	96027.5	5.07311	0.00314206
97.4323		539.488	220.312	0.00722634	0	63.6562	96972.5	5.07311	0.00196637
106.102		539.488	233.75	0.0598369	0	65.5938	96404.4	5.07311	0.00276328
75.7607		539.488	263.656	0.0850117	0	42.375	95808.8	5.24484	0.00327869
62.1809	0.106667	539.488	250.062	0.042279	0	23.0625	96080	5.24484	0.00262184
79.6797		539.488	231.188	0.0190174	0	55.0938	96482.2	5.24484	0.00228259
90.9442		539.488	223.844	0.00805734	0	63.25	96280.3	5.24484	0.00215088
117.817		539.488	205.969	0.0103015	0	75.4062	96439.4	5.28575	0.00175369
189.875		539.488	212.625	0.00976389	0	82.25	96408.4	5.28575	0.00186312
112.103		539.488	235.562	0.00609769	0	84.125	96008.1	5.28575	0.00249953
114.905		539.488	233.656	0.0524465	0	91.875	96088.1	5.28575	0.00235837
128.661		539.488	239.688	-0.00648424	0	111	96165.3	5.09541	0.00268028
73.6369		539.488	235.188	0.00864693	0	124.125	96148.1	5.09541	0.00277994
38.8148	0.0998	539.488	256.031	0.141675	2.75	61.8438	95976.2	4.52678	0.00351497
40.0173	0.0995	539.488	284.938	0.139729	5.125	36.6562	95246.9	4.52678	0.00403191
20.2396	0.086625	539.488	276.125	0.0975548	6.375	44.8438	95608.4	4.52678	0.00349278
29.5059	0.22	539.488	306.781	0.151494	1.375	41.1875	95386.6	4.52678	0.00526506
30.9479		539.488	301.125	0.144953	3	48.6562	95538.8	4.08449	0.00458388
20.2083	0.0639167	539.488	284.719	0.218715	35.875	59.0938	95485.3	4.08449	0.00368675
20.2271	0.111033	539.488	310.312	0.343052	48.75	58.9375	95503.4	4.08449	0.00525778
32.7563	0.199	539.488	323.438	0.384581	3.125	55.0625	95280.9	4.08449	0.00602759
12.923	0.177833	539.488	325.188	0.31001	2.875	57.7188	95272.5	4.70535	0.00613941
20.1111	0.154333	539.488	323.688	0.393606	5.75	59.7188	95310	4.70535	0.00596375
15.0168	0.155233	539.488	309.469	0.473488	31.25	69.9688	95231.6	4.70535	0.00488113
16.8281	0.165583	539.488	336.094	0.325122	14.375	66.2812	95026.6	4.70535	0.00620009
22.2167	0.128694	539.488	359	0.415632	55.5	69.625	94990	3.8099	0.00704791
15.9376	0.216556	539.488	369.75	0.343576	10.75	56.6875	94867.5	3.8099	0.00903512
14.625	0.1753	539.488	341.75	0.373844	8.5	60.625	95107.2	3.8099	0.00657084
13.3125	0.108389	539.488	364.344	0.365858	0.875	58.6875	94497.2	3.8099	0.00779856
15.9301	0.116167	539.488	357.969	0.420524	24.5	72.5938	94775.9	3.10163	0.00695341
14.0111	0.108533	539.488	358.125	0.518207	5.25	63.0312	94629.1	3.10163	0.00756178
14.8194	0.18375	539.488	368.062	0.277249	16.625	60.4688	94718.4	3.10163	0.00811184
27.7222	0.176	539.488	361.969	0.465195	13.125	49.25	94940.9	3.10163	0.00911831
20.5417	0.157125	539.488	355.094	0.471245	54.375	65.0625	94768.1	3.13437	0.0073405
20.0562	0.160024	539.488	346.594	0.380779	101	58.3125	95047.5	3.13437	0.00684225
24.8671	0.168095	539.488	349.688	0.397839	153.25	57.9062	95079.1	3.13437	0.00652741
23.099	0.121345	539.488	345.625	0.48689	179.25	52.9062	95045.3	3.33868	0.0065315
24.4062	0.174792	539.488	340.781	0.454404	157.625	51.2812	95206.9	3.33868	0.00624178
26.8297	0.153562	539.488	332.688	0.418128	193.5	47.5938	95238.8	3.33868	0.00540759
24.25	0.215433	539.488	320.25	0.317886	148.375	36.0625	95515.6	3.33868	0.00532919
42.728	0.178167	539.488	271.031	0.302451	124.5	44.9062	96099.4	3.81189	0.00369259
53.8095	0.1835	539.488	288.312	0.131553	14.5	39.4375	95601.9	3.81189	0.00364828
40.3017	0.2215	539.488	244.531	0.187404	0.5	34.0625	96555.6	3.81189	0.00249109
41.7143	0.1668	539.488	265.125	0.208527	2.5	32.2812	96109.1	3.81189	0.00308944
53.2738	0.191583	539.488	250.812	0.0771872	0	28.4375	96558.8	4.46674	0.00263934
32.0783	0.164	539.488	260.969	0.00254503	0	33.5	96027.5	4.46674	0.00314206
95.5313		539.488	220.312	0.0739227	0	63.6562	96972.5	4.46674	0.00196637
128.573		539.488	233.75	0.0430157	0	65.5938	96404.4	4.46674	0.00276328
61.9633		539.488	263.656	0.160534	0	42.375	95808.8	4.46482	0.00327869
56.5586	0.0853333	539.488	250.062	0.0436732	0	23.0625	96080	4.46482	0.00262184
59.9109		539.488	231.188	0.0193457	0	55.0938	96482.2	4.46482	0.00228259
57.5157		539.488	223.844	0.0296638	0	63.25	96280.3	4.46482	0.00215088
97.7597		539.488	205.969	0.0293887	0	75.4062	96439.4	4.35513	0.00175369
161.542		539.488	212.625	0.032412	0	82.25	96408.4	4.35513	0.00186312
88.0942		539.488	235.562	0.01618	0	84.125	96008.1	4.35513	0.00249953
106.014		539.488	233.656	0.0304455	0	91.875	96088.1	4.35513	0.00235837
116.44		539.488	239.688	0.0110229	0	111	96165.3	4.35837	0.00268028
74.5139		539.488	235.188	0.037863	0	124.125	96148.1	4.35837	0.00277994
23.2639	0.113445	539.488	256.031	0.138028	4.5	61.8438	95976.2	5.05577	0.00351497
	0.067	539.488	284.938	0.147001	10.125	36.6562	95246.9	5.05577	0.00403191
	0.0995	539.488	276.125	0.0627646	6.875	44.8438	95608.4	5.05577	0.00349278
	0.22625	539.488	306.781	0.136975	1.625	41.1875	95386.6	5.05577	0.00526506
		539.488	301.125	0.0911962	3.625	48.6562	95538.8	4.18083	0.00458388
	0.0487083	539.488	284.719	0.166047	31.75	59.0938	95485.3	4.18083	0.00368675
	0.1095	539.488	310.312	0.249892	45.125	58.9375	95503.4	4.18083	0.00525778
	0.14925	539.488	323.438	0.297539	1.25	55.0625	95280.9	4.18083	0.00602759
	0.1325	539.488	325.188	0.179748	3	57.7188	95272.5	4.82664	0.00613941
	0.2158	539.488	323.688	0.361488	4.375	59.7188	95310	4.82664	0.00596375
11.5714	0.134833	539.488	309.469	0.31709	25.625	69.9688	95231.6	4.82664	0.00488113
	0.155056	539.488	336.094	0.297238	13	66.2812	95026.6	4.82664	0.00620009
	0.106333	539.488	359	0.3568	67.5	69.625	94990	3.88573	0.00704791
18.3472	0.17	539.488	369.75	0.18889	20	56.6875	94867.5	3.88573	0.00903512
15.7083	0.159133	539.488	341.75	0.306364	11.875	60.625	95107.2	3.88573	0.00657084
	0.1218	539.488	364.344	0.392152	1	58.6875	94497.2	3.88573	0.00779856
	0.089389	539.488	357.969	0.295873	22.25	72.5938	94775.9	3.31499	0.00695341
15.5565	0.105567	539.488	358.125	0.343029	5	63.0312	94629.1	3.31499	0.00756178
25.5	0.159792	539.488	368.062	0.25687	17.375	60.4688	94718.4	3.31499	0.00811184
24.5046	0.1335	539.488	361.969	0.263006	11.25	49.25	94940.9	3.31499	0.00911831
23.8333	0.162062	539.488	355.094	0.425711	57.125	65.0625	94768.1	3.31701	0.0073405
	0.154857	539.488	346.594	0.35191	111.25	58.3125	95047.5	3.31701	0.00684225
31.375	0.150639	539.488	349.688	0.319302	168.5	57.9062	95079.1	3.31701	0.00652741
	0.11669	539.488	345.625	0.322908	200.25	52.9062	95045.3	3.57966	0.0065315
28.2917	0.157979	539.488	340.781	0.352367	187.125	51.2812	95206.9	3.57966	0.00624178
	0.147094	539.488	332.688	0.308888	224.75	47.5938	95238.8	3.57966	0.00540759
	0.222125	539.488	320.25	0.230788	167.875	36.0625	95515.6	3.57966	0.00532919
	0.178929	539.488	271.031	0.288958	146.75	44.9062	96099.4	4.03454	0.00369259
	0.218	539.488	288.312	0.166276	22.375	39.4375	95601.9	4.03454	0.00364828
17.4211	0.241	539.488	244.531	0.126458	0.625	34.0625	96555.6	4.03454	0.00249109
	0.144583	539.488	265.125	0.15316	3	32.2812	96109.1	4.03454	0.00308944
	0.171556	539.488	250.812	0.117241	0	28.4375	96558.8	4.94497	0.00263934
26.5947	0.138	539.488	260.969	0.00256074	0	33.5	96027.5	4.94497	0.00314206
		539.488	220.312	0.000207428	0	63.6562	96972.5	4.94497	0.00196637
58.2083		539.488	233.75	0.0166582	0	65.5938	96404.4	4.94497	0.00276328
44.375		539.488	263.656	0.177376	0	42.375	95808.8	5.07459	0.00327869
17.9167	0.105	539.488	250.062	0.04859	0	23.0625	96080	5.07459	0.00262184
		539.488	231.188	0.0186787	0	55.0938	96482.2	5.07459	0.00228259
		539.488	223.844	0.0118112	0	63.25	96280.3	5.07459	0.00215088
		539.488	205.969	0.0166248	0	75.4062	96439.4	5.1324	0.00175369
128.573		539.488	212.625	0.013554	0	82.25	96408.4	5.1324	0.00186312
25.2083		539.488	235.562	0.00881314	0	84.125	96008.1	5.1324	0.00249953
102.188		539.488	233.656	0.0115987	0	91.875	96088.1	5.1324	0.00235837
115.625		539.488	239.688	0.000422118	0	111	96165.3	4.9542	0.00268028
		539.488	235.188	0.00848283	0	124.125	96148.1	4.9542	0.00277994
14.6193		438.624	232.375	0.0639147	0	90.125	97224.7	6.12126	0.00256912
16.7459		438.624	246.906	0.0838837	0	42.5938	96495.6	6.12126	0.00298184
14.1825	0.1205	438.624	267.688	0.097203	5	49.7188	96760.9	6.12126	0.00421053
12.6081	0.140556	438.624	293.844	0.0772589	8	46.0938	96460.3	6.12126	0.00578981
13.599	0.124375	438.624	292.094	0.101873	16.25	50.7812	96614.1	4.93921	0.00553244
10.5278	0.101393	438.624	274.344	0.136072	56.25	61.4375	96582.2	4.93921	0.00425537
14.0204	0.140375	438.624	307.156	0.153803	111.75	61.3438	96445.3	4.93921	0.00608003
10.2536	0.186875	438.624	322.781	0.192494	4	48.75	96272.8	4.93921	0.00593838
19.0495	0.0783333	438.624	312.281	0.262602	12.875	61.0625	96250.3	5.35238	0.00600997
16.7601	0.1649	438.624	312.094	0.238035	11.75	62.3438	96365.9	5.35238	0.00573622
15.7896	0.138958	438.624	295.656	0.279359	72	76.6875	96356.2	5.35238	0.00464862
18.6667	0.180945	438.624	339.875	0.28568	65.875	69.5312	95885.3	5.35238	0.00823963
16.326	0.143655	438.624	363.688	0.365435	54.625	77.0312	95863.1	4.52684	0.00960444
18.5159	0.175813	438.624	365.312	0.26707	31	67.8438	95739.4	4.52684	0.00947012
16.25	0.118167	438.624	349.062	0.240684	19.125	69.8125	96002.8	4.52684	0.00882
14.4323	0.144333	438.624	365.594	0.315789	8.125	67.875	95394.4	4.52684	0.00938169
17.3838	0.127611	438.624	363.656	0.38027	29	76.8125	95672.5	3.75955	0.00903722
16.4358	0.201	438.624	366.625	0.300056	3	68.6562	95448.4	3.75955	0.00920963
20.8274	0.264056	438.624	376.156	0.282935	2.75	64.375	95656.2	3.75955	0.0106305
23.5175	0.168119	438.624	364	0.381343	31	64.0938	95957.2	3.75955	0.00945556
18.5367	0.0875	438.624	342.875	0.316552	111.25	69.5	95793.1	4.3661	0.00707672
19.6889	0.119464	438.624	335.406	0.373368	201.375	67.3125	96071.9	4.3661	0.00648087
18.4943	0.106615	438.624	331.562	0.378901	286.25	64	96096.9	4.3661	0.00535175
19.3438	0.0768333	438.624	327.281	0.23304	318.125	59.75	96010.6	4.41613	0.00496628
20.6329	0.107528	438.624	339.125	0.269326	340.625	50.4375	96226.9	4.41613	0.00738425
21.7512	0.109333	438.624	332.469	0.211031	365.75	49.4688	96280.9	4.41613	0.00702669
15.6286	0.107625	438.624	317.625	0.148687	290.25	39.0625	96453.1	4.41613	0.00574662
16.622	0.189	438.624	278.969	0.112101	248.875	37.9375	97105	4.82174	0.00446834
18.0319	0.21125	438.624	287.438	0.0440194	70.25	34.125	96563.4	4.82174	0.00435419
13.562		438.624	256.844	0.166841	25.375	28.7188	97632.5	4.82174	0.00285684
23.3958	0.14775	438.624	265.094	0.0801296	2.625	28.125	97111.6	4.82174	0.00347553
15.6726	0.0905	438.624	260.906	-0.00946818	0	22.7188	97397.5	5.47963	0.00298512
15.9764		438.624	246.844	0.00344935	0	48.625	97145.3	5.47963	0.00230369
27.8229		438.624	201.312	0.00265684	0	65.1875	98195.3	5.47963	0.00128319
27.9738		438.624	236.781	-0.00627075	0	52.0312	97284.7	5.47963	0.00233422
14.1558		438.624	246.469	0.0105646	0	43.7812	96961.9	5.08991	0.00283978
17.5471		438.624	230.094	0.00142497	0	51	97211.2	5.08991	0.00224572
18.3872		438.624	233.531	0.00606576	0	50.5	97465	5.08991	0.00213656
20.5203		438.624	240.719	0.00701137	0	47.0938	97276.6	5.08991	0.00230828
30.8525		438.624	205.594	0.00413309	0	61.4688	97485.9	5.06842	0.00150909
25.6615		438.624	203.594	0.00484762	0	72	97524.7	5.06842	0.00163184
24.7637		438.624	211.156	0.00249191	0	77.625	97260.6	5.06842	0.001895
18.5938		438.624	211.656	0.00773324	0	88.2812	97343.8	5.06842	0.00187541
39.2083		438.624	230.938	-0.000184736	0	96.3438	97377.8	5.14902	0.00200512
15.9688		438.624	230.625	-0.00490255	0	104	97251.9	5.14902	0.00247278
9.32712		1483.74	209.656	-0.0354952	0	63.3438	85431.6	4.66485	0.00207309
8.58799		1483.74	216.719	-0.0309128	0	72.0312	85078.8	4.66485	0.0026385
13.4576		1483.74	262.469	0.00473378	0	41.5625	85367.5	4.66485	0.00385322
8.22192		1483.74	275.438	0.0944435	0	38.7188	85087.2	4.66485	0.00483988
6.54167		1483.74	264.969	0.084738	0.125	27.375	85114.4	4.20075	0.00444084
7.1875	0.096	1483.74	264.938	0.175037	3.875	26.0312	85046.6	4.20075	0.00374603
7.88496	0.123083	1483.74	273.875	0.156845	3.875	32.8125	85074.7	4.20075	0.00492944
6.79257	0.154667	1483.74	263.875	0.15329	0	36.2188	84850.6	4.20075	0.00379022
6.81703	0.131375	1483.74	269.719	0.280191	1.5	36	84918.8	5.21449	0.00423872
8.08273	0.09725	1483.74	279.312	0.153352	1.5	33.9062	84971.6	5.21449	0.00429169
5.16929	0.117417	1483.74	275.719	0.258746	9.75	39.1875	85202.5	5.21449	0.00373666
5.93056	0.189875	1483.74	301.531	0.292729	9.625	43.625	84767.8	5.21449	0.007366
6.675	0.096111	1483.74	325	0.279478	31.875	40.4688	84835	4.07013	0.0101216
5.34722	0.10575	1483.74	330.219	0.344671	61.25	37.4688	84676.2	4.07013	0.00887541
5.4	0.118833	1483.74	316.031	0.290979	13.25	35.0625	84916.9	4.07013	0.00871912
8.28333	0.141333	1483.74	325.688	0.325881	28.5	43.2812	84508.8	4.07013	0.00907556
6.19073	0.127	1483.74	324.438	0.363922	20.75	43.9688	84704.4	3.81474	0.00899981
7.79932	0.152875	1483.74	329.656	0.402997	16.25	43.0625	84537.8	3.81474	0.00948581
7.97333	0.206875	1483.74	334.719	0.469342	9.875	38.9375	84745.6	3.81474	0.0104559
7.68146	0.1053	1483.74	326.438	0.301207	35.375	39.6875	84978.8	3.81474	0.00873509
7.27083	0.114405	1483.74	302.156	0.420502	84.75	40	84851.6	4.42577	0.00656478
7.28514	0.0790666	1483.74	295.094	0.323507	164.25	39.4688	85029.1	4.42577	0.00617556
7.94312	0.0681429	1483.74	292.906	0.254194	243.375	36.5625	85197.8	4.42577	0.00474584
6.875	0.0744062	1483.74	288.688	0.349668	263.375	33.125	85058.8	4.06787	0.00513303
7.853	0.0707	1483.74	297.438	0.181102	245.875	29.8125	85223.4	4.06787	0.00623537
8.95471	0.124083	1483.74	287.281	0.121709	221.125	28.375	85171.6	4.06787	0.00623156
6.85	0.0694443	1483.74	278.438	0.112531	185.25	20.0938	85220.3	4.06787	0.00490038
8.25568	0.126	1483.74	265.219	0.134375	81.375	15.5625	85508.8	3.46117	0.00342434
8.01993	0.19	1483.74	281.656	0.110291	0	10.7188	85148.4	3.46117	0.00396062
7.98904		1483.74	239.438	0.0591939	0	14.4375	85603.1	3.46117	0.00226791
7.1875		1483.74	231.375	-0.0108996	0	32.75	85713.4	3.46117	0.00273375
6.48611		1483.74	252.188	-0.0187193	0	13.4062	85475.6	4.04765	0.00237581
7.20669		1483.74	218.031	-0.0150778	0	24.75	85078.8	4.04765	0.00155253
6.375		1483.74	184.188	-0.0152357	0	34.1875	86019.7	4.04765	0.00112628
6.67794		1483.74	221	-0.020869	0	26.875	85708.8	4.04765	0.00221194
9.53423		1483.74	226.625	-0.0199234	0	25.6562	85299.7	3.90171	0.00225841
11.9418		1483.74	216.875	-0.0157384	0	25.5625	85522.5	3.90171	0.00217347
7.2307		1483.74	220.375	-0.0233139	0	19.125	85578.8	3.90171	0.00170931
7.03193		1483.74	217.156	-0.0164546	0	21.6562	85413.4	3.90171	0.00176153
7.2808		1483.74	189.906	-0.0216992	0	28.9688	85561.9	3.81212	0.00129262
		1483.74	190.938	-0.0267448	0	31.5938	85690	3.81212	0.00134584
		1483.74	197.531	-0.0277437	0	36.3125	85501.6	3.81212	0.00172894
		1483.74	206.594	-0.0182344	0	37.3125	85470.9	3.81212	0.00182347
		1483.74	224.562	-0.0271715	0	39.9375	85545.3	4.14714	0.00212094
		1483.74	212.219	-0.0385202	0	51.4688	85481.9	4.14714	0.00209375
15.7726		801.12	214.312	-0.017335	0	91.5938	93142.8	4.62573	0.00217534
11.8947		801.12	223.25	-0.0207979	0	100.406	92629.1	4.62573	0.00279963
17.971		801.12	265.438	0.0501925	0	42.6875	92787.5	4.62573	0.00425353
9.84757		801.12	275.875	0.0611296	0.25	39.9062	92413.1	4.62573	0.00522053
7.22917	0.115292	801.12	269.469	0.0716586	12	36.2188	92442.8	4.21902	0.00470697
7.36667	0.128833	801.12	264.219	0.104526	16.125	40.0938	92440.3	4.21902	0.00406475
7.86866	0.118292	801.12	286.906	0.137914	58.625	44.0312	92261.9	4.21902	0.00487572
8.56365	0.127667	801.12	271.531	0.0873997	48.375	49.3125	92127.8	4.21902	0.00378341
7.77096	0.09425	801.12	277.719	0.261642	17	49.375	92165.9	5.21307	0.00423828
9.3663	0.140417	801.12	289.531	0.148078	2.625	45.5	92215.9	5.21307	0.00441437
6.40861	0.105262	801.12	290.031	0.230802	43.625	51.6562	92398.1	5.21307	0.00358431
7.69271	0.137833	801.12	323.25	0.241321	51.75	55.5312	91805.6	5.21307	0.00686997
7.36071	0.09805	801.12	345.031	0.29435	106	52.8125	91806.2	4.15703	0.00966553
8.9705	0.10125	801.12	345.469	0.0652586	158.25	49.625	91648.8	4.15703	0.0085345
6.49306	0.18025	801.12	332.969	0.374378	86	48.375	91964.4	4.15703	0.00865388
8.27083	0.153042	801.12	349.438	0.207199	109.375	54.1562	91436.2	4.15703	0.00906478
8.1721	0.129972	801.12	347.312	0.301586	126.5	54.4062	91621.9	3.87447	0.00843522
6.31836	0.1821	801.12	354	0.21953	146.375	53.25	91453.4	3.87447	0.00945225
7.97083	0.215917	801.12	359.625	0.334869	150.375	49.0938	91664.4	3.87447	0.0104644
9.33442	0.145278	801.12	346.969	0.289214	175.375	49.3125	91925.3	3.87447	0.00880669
7.25	0.130542	801.12	317.594	0.255284	241.75	51.25	91869.4	4.47723	0.00640125
8.00023	0.12325	801.12	321.969	0.278366	334.75	44.0625	92070	4.47723	0.00615769
8.85119	0.118906	801.12	316.094	0.252921	419.375	43.5938	92196.9	4.47723	0.00485697
9.55	0.08375	801.12	307.344	0.24263	441.25	42.25	92096.9	4.1487	0.00520956
	0.08735	801.12	317.5	0.221905	430.125	36.4062	92255.3	4.1487	0.00627691
	0.131821	801.12	306.594	0.146101	414.25	35.5625	92278.4	4.1487	0.00624734
	0.0740833	801.12	295.438	0.0941829	397.375	26.5625	92444.1	4.1487	0.00506506
16.2083	0.18775	801.12	262.844	0.0664491	253.375	23.8125	92979.4	3.48921	0.00358359
12.375	0.1945	801.12	287.281	0.0694266	71	15.6562	92518.4	3.48921	0.00427625
7.68991		801.12	238.844	0.081592	23.5	20.8438	93264.1	3.48921	0.00253891
12.2388		801.12	235.938	0.0870503	0.25	20.375	93299.7	3.48921	0.00273456
11.0536		801.12	252.594	-0.0139017	0	12.9688	93100.3	3.96144	0.002644
20.0927		801.12	219.312	-0.0165397	0	30.4688	92850.6	3.96144	0.00193653
33.7083		801.12	186.875	-0.0203504	0	39.0938	93910	3.96144	0.00112259
30.4261		801.12	225.125	-0.0161907	0	29.125	93346.6	3.96144	0.0023405
23.6389		801.12	237.25	-0.0300601	0	23.1562	92911.2	3.80548	0.00253475
22.8475		801.12	224.812	-0.0242594	0	25.6875	93171.9	3.80548	0.00245713
26.1591		801.12	217.719	-0.0205696	0	25.1562	93349.7	3.80548	0.00173837
26.2179		801.12	215.344	-0.0240859	0	28.625	93135.3	3.80548	0.00180028
35.5713		801.12	192.938	-0.0148855	0	35.4062	93351.9	3.56228	0.00127341
26.3229		801.12	194.625	-0.0216779	0	41.6562	93522.8	3.56228	0.0012785
30.9942		801.12	203.531	-0.0197442	0	50.9688	93232.2	3.56228	0.00179706
19.2431		801.12	210.312	-0.0183009	0	57.4375	93199.7	3.56228	0.00186513
25.4931		801.12	225.531	-0.0165004	0	64.375	93224.1	4.00824	0.00217878
22.2708		801.12	215.344	-0.019373	0	75.4062	93165.9	4.00824	0.00219309
63.3059		529.376	243.156	-0.0015988	0	116.719	96369.4	3.37954	0.00227078
36.5558		529.376	246.25	-0.00698162	0	127.344	95750.3	3.37954	0.00246122
21.4137		529.376	271.906	0.0208623	0.375	57	95868.1	3.37954	0.00420675
11.7745	0.0955	529.376	302.469	0.0688642	2.75	37.2188	95484.1	3.37954	0.00629094
10.9861	0.11025	529.376	312.281	0.0398181	23.375	39.1875	95552.2	4.40282	0.00630181
6.92708	0.07975	529.376	290.562	0.136057	63.5	48.5938	95554.4	4.40282	0.00487709
7.5352	0.118976	529.376	306.469	0.221395	181	51.6562	95405	4.40282	0.00357256
9.38889	0.192433	529.376	325.312	0.245482	53.25	42.9688	95247.8	4.40282	0.00626003
10.3478	0.16875	529.376	329.469	0.128709	7	44.2812	95290.3	4.51498	0.00706953
9.60417	0.0995557	529.376	318.344	0.264269	34.75	46.2812	95350.3	4.51498	0.00601219
10.4493	0.124	529.376	304.219	0.360512	140.5	64.4688	95375.9	4.51498	0.00459716
8.80833	0.128833	529.376	346.062	0.382722	199	53.375	94913.4	4.51498	0.00658697
10.6458	0.102071	529.376	364.438	0.29369	308.5	61.5625	94862.2	4.37382	0.00649234
11.8741	0.1399	529.376	376.031	0.335851	338.125	54.75	94759.7	4.37382	0.00934859
7.76667	0.1305	529.376	360.406	0.438426	170.875	53.0625	95037.5	4.37382	0.00844184
9.18333	0.123967	529.376	383.125	0.399623	179.125	56.25	94411.9	4.37382	0.0111293
7.25385	0.139694	529.376	364.031	0.388954	150.75	60.3125	94702.2	3.98768	0.00777244
9.74702	0.114625	529.376	379.406	0.274498	130.375	49.2188	94507.2	3.98768	0.00969025
13.3033	0.191083	529.376	385.5	0.292853	107.5	50.25	94671.9	3.98768	0.0110747
9.68056	0.215569	529.376	380.844	0.378212	93.5	43.125	95014.7	3.98768	0.0120402
9.69444	0.1745	529.376	370.344	0.383795	148.5	48.2188	94817.5	3.75345	0.0102944
11.375	0.223333	529.376	374.875	0.235553	180.375	41.3125	95108.8	3.75345	0.0103787
14.7396	0.2016	529.376	364.406	0.28205	253.875	42	95167.5	3.75345	0.00871353
12	0.137708	529.376	347.844	0.378738	332.625	44.6875	95068.1	3.87593	0.00725281
12.4167	0.162917	529.376	356.688	0.345488	396.625	39.125	95250.9	3.87593	0.00912647
14.5101	0.177771	529.376	352.781	0.370593	448.875	37.5312	95262.8	3.87593	0.00715078
14.5851	0.22275	529.376	332.125	0.192254	450.875	32.8438	95489.1	3.87593	0.00742338
15.7189	0.199952	529.376	277.688	0.35156	451.625	37.1875	96114.7	3.43123	0.00488859
44.8438	0.38475	529.376	292	0.175118	416.875	28.6562	95569.1	3.43123	0.00472662
26.3676	0.302	529.376	268.969	0.0116339	382	20.5	96522.2	3.43123	0.00375912
38.4643	0.373833	529.376	247.312	0.0965504	93.5	27.1562	96358.8	3.43123	0.00301591
52.3417	0.204375	529.376	256.469	0.102057	0	23.8125	96390	2.93394	0.00337131
31.1051	0.1155	529.376	240.625	0.0893001	0	25.0625	96042.8	2.93394	0.00314194
87.5476		529.376	207.938	0.0165548	0	40.3125	97277.5	2.93394	0.00145041
165.482		529.376	221.938	0.011309	0	43.5625	96522.8	2.93394	0.00207472
148.083		529.376	250.469	-0.00173172	0	32.25	96105.9	2.18323	0.0027495
72.7585		529.376	231.188	-0.00109075	0	37.6562	96377.8	2.18323	0.001993
107.554		529.376	218.75	0.000427551	0	44.875	96630.9	2.18323	0.0014945
164.727		529.376	214.281	-0.00215224	0	51.0625	96395.3	2.18323	0.00149044
179.358		529.376	198.562	0.00594801	0	57.0312	96652.5	2.19514	0.00114463
183.292		529.376	194.062	0.00840738	0	68	96792.5	2.19514	0.0009645
187.364		529.376	217.094	-0.00150483	0	70.2188	96469.4	2.19514	0.00142322
121.104		529.376	226.875	-0.00195108	0	77	96486.9	2.19514	0.00158016
145.323		529.376	221.781	-0.000910206	0	89.7188	96465.9	2.56968	0.00154972
71.7812		529.376	227.156	0.0009468	0	98.3125	96441.2	2.56968	0.00182056
125.631		529.376	243.156	-0.000967666	0	116.719	96369.4	3.66926	0.00227078
70.5035		529.376	246.25	-0.012704	0	127.344	95750.3	3.66926	0.00246122
47.945		529.376	271.906	-9.86919e-05	0.625	57	95868.1	3.66926	0.00420675
25.0734	0.083	529.376	302.469	0.0574914	1.875	37.2188	95484.1	3.66926	0.00629094
22.2024	0.112625	529.376	312.281	0.0420721	25.125	39.1875	95552.2	4.61543	0.00630181
14.8056	0.0837666	529.376	290.562	0.114699	69	48.5938	95554.4	4.61543	0.00487709
20.5305	0.130833	529.376	306.469	0.204295	181	51.6562	95405	4.61543	0.00357256
15.871	0.177083	529.376	325.312	0.221975	42.625	42.9688	95247.8	4.61543	0.00626003
19.2334	0.234833	529.376	329.469	0.206185	7.125	44.2812	95290.3	4.69637	0.00706953
14.8333	0.108833	529.376	318.344	0.233551	28.5	46.2812	95350.3	4.69637	0.00601219
14.0595	0.140437	529.376	304.219	0.364396	125.25	64.4688	95375.9	4.69637	0.00459716
16.6354	0.161889	529.376	346.062	0.360828	187	53.375	94913.4	4.69637	0.00658697
18.7071	0.118833	529.376	364.438	0.293364	294	61.5625	94862.2	4.56518	0.00649234
18.4891	0.1684	529.376	376.031	0.325051	327.25	54.75	94759.7	4.56518	0.00934859
11.5417	0.148119	529.376	360.406	0.430073	169.375	53.0625	95037.5	4.56518	0.00844184
15.7708	0.135767	529.376	383.125	0.376804	178.5	56.25	94411.9	4.56518	0.0111293
11.5611	0.158111	529.376	364.031	0.375231	154.875	60.3125	94702.2	4.15931	0.00777244
14.1774	0.139563	529.376	379.406	0.250332	130.875	49.2188	94507.2	4.15931	0.00969025
21.9048	0.208056	529.376	385.5	0.301874	111	50.25	94671.9	4.15931	0.0110747
16.5575	0.184983	529.376	380.844	0.402795	99	43.125	95014.7	4.15931	0.0120402
18.7095	0.184889	529.376	370.344	0.312415	153.75	48.2188	94817.5	3.88495	0.0102944
17.9106	0.225	529.376	374.875	0.288314	183	41.3125	95108.8	3.88495	0.0103787
23.8333	0.205633	529.376	364.406	0.268627	251.75	42	95167.5	3.88495	0.00871353
18.4688	0.130542	529.376	347.844	0.35394	329.25	44.6875	95068.1	4.02227	0.00725281
20.4991	0.16375	529.376	356.688	0.317406	389.25	39.125	95250.9	4.02227	0.00912647
22.8934	0.183	529.376	352.781	0.32471	437.625	37.5312	95262.8	4.02227	0.00715078
24.1408	0.184667	529.376	332.125	0.237326	433.625	32.8438	95489.1	4.02227	0.00742338
19.5795	0.195238	529.376	277.688	0.299465	434.25	37.1875	96114.7	3.66155	0.00488859
37.5784	0.398	529.376	292	0.0905562	406	28.6562	95569.1	3.66155	0.00472662
24.9529	0.36	529.376	268.969	0.0129677	373.625	20.5	96522.2	3.66155	0.00375912
39.596	0.3545	529.376	247.312	0.12994	90.75	27.1562	96358.8	3.66155	0.00301591
40.7153	0.1975	529.376	256.469	0.140088	0	23.8125	96390	3.22936	0.00337131
23.1522	0.116	529.376	240.625	0.0369375	0	25.0625	96042.8	3.22936	0.00314194
87.4167		529.376	207.938	0.0191386	0	40.3125	97277.5	3.22936	0.00145041
114.818		529.376	221.938	0.00527617	0	43.5625	96522.8	3.22936	0.00207472
100.406		529.376	250.469	-0.00657454	0	32.25	96105.9	2.48473	0.0027495
63.2847		529.376	231.188	0.00119002	0	37.6562	96377.8	2.48473	0.001993
109.414		529.376	218.75	-0.00949001	0	44.875	96630.9	2.48473	0.0014945
178.12		529.376	214.281	0.00207429	0	51.0625	96395.3	2.48473	0.00149044
206.503		529.376	198.562	0.00354405	0	57.0312	96652.5	2.49612	0.00114463
216.526		529.376	194.062	0.00352682	0	68	96792.5	2.49612	0.0009645
228.514		529.376	217.094	0.00139681	0	70.2188	96469.4	2.49612	0.00142322
156.812		529.376	226.875	0.00120882	0	77	96486.9	2.49612	0.00158016
203.345		529.376	221.781	-0.0012153	0	89.7188	96465.9	2.81084	0.00154972
117.175		529.376	227.156	0.00271584	0	98.3125	96441.2	2.81084	0.00182056
103.848		505.056	239.906	-0.00921592	0	147.781	96555.3	3.43922	0.00231713
143.467		505.056	233.75	-0.0178471	0	171.438	95928.1	3.43922	0.00243928
84.0999		505.056	274.875	0.0164381	1.5	43.75	96064.1	3.43922	0.00390241
42.2507	0.172833	505.056	313.406	0.0982209	6.375	42.875	95657.5	3.43922	0.00612925
34.7812	0.1303	505.056	317.469	0.0984921	20.75	48.5938	95732.8	4.65408	0.00676944
23.4514	0.125	505.056	294.312	0.097612	57.75	50.6875	95772.5	4.65408	0.00500091
27.1583	0.136571	505.056	305.219	0.220346	158.875	62.9062	95612.8	4.65408	0.00470541
19.4828	0.216667	505.056	325.094	0.132642	90.125	49.4375	95453.1	4.65408	0.00632859
21.5793	0.256125	505.056	327.656	0.180024	8.5	54.1875	95489.1	4.67123	0.00682606
11.9663	0.2035	505.056	322.75	0.223471	24	59.6875	95538.4	4.67123	0.00623187
18.4399	0.156167	505.056	298.156	0.338398	117.875	75.2812	95580.3	4.67123	0.004619
20.9948	0.185	505.056	352.125	0.2554	176.125	63.2812	95096.9	4.67123	0.00738844
21.2948	0.142119	505.056	374	0.30925	283.25	71.375	95052.2	4.56111	0.00778728
21.1302	0.185917	505.056	375.375	0.272329	292	60.8438	94948.8	4.56111	0.00995794
16.0774	0.145476	505.056	359.594	0.287342	92.75	62.8125	95249.4	4.56111	0.00954406
19.0781	0.115071	505.056	376.906	0.276475	80.25	65.875	94608.1	4.56111	0.0111332
16.9586	0.126067	505.056	370.969	0.342314	45.375	66.6562	94916.2	4.15891	0.00910772
18.8245	0.0856666	505.056	380.812	0.269295	75.875	64.5312	94695.9	4.15891	0.0111821
24.9667	0.173472	505.056	389.719	0.324023	81.375	56.9688	94867.2	4.15891	0.0114084
19.8086	0.226875	505.056	386	0.326965	73.5	52.5312	95174.1	4.15891	0.0118193
23.5518	0.138667	505.056	377.875	0.338596	127.375	56.4062	94997.8	3.83955	0.0107167
28.1333	0.146	505.056	376.375	0.193453	174	54.2812	95271.6	3.83955	0.0107606
31.3268	0.111056	505.056	359.938	0.216788	250	53.5938	95363.4	3.83955	0.00857025
30.0781	0.0984286	505.056	344.719	0.315282	342.375	55.9062	95284.4	3.99388	0.00647
33.2156	0.09875	505.056	349.656	0.219	415	48.6875	95447.5	3.99388	0.00813997
31.8653	0.1356	505.056	350.75	0.260208	467.75	48.5625	95461.6	3.99388	0.00823634
33.9912	0.152125	505.056	331.438	0.211877	433.375	38.7812	95669.7	3.99388	0.00693094
28.497	0.205067	505.056	280.281	0.202728	426	41.875	96313.1	3.49309	0.00482878
69.933	0.2666	505.056	289.5	0.147224	332.125	34.0938	95754.1	3.49309	0.00473772
26.0112	0.1935	505.056	263.844	0.0757131	286.375	28.2188	96702.5	3.49309	0.00378059
65.381	0.241	505.056	248.25	0.167874	69.875	33.3438	96550.9	3.49309	0.00269534
50.3631	0.114667	505.056	257.375	0.0980501	0	28.5938	96595.9	2.87379	0.00309131
32.3434	0.169875	505.056	244.312	0.0904189	0	34.3438	96213.1	2.87379	0.00304869
105.703		505.056	208.062	0.0415024	0	58.125	97472.2	2.87379	0.00160869
164.537		505.056	226.875	0.0128018	0	58.625	96713.1	2.87379	0.00249587
89.4028		505.056	245.812	0.0017016	0	52.75	96275.3	2.21635	0.00266497
81.8188		505.056	231.375	0.00385752	0	40.75	96544.1	2.21635	0.00210956
130.272		505.056	218.625	-0.00486196	0	61.75	96816.6	2.21635	0.00166197
221.121		505.056	220.219	-0.00220427	0	65.75	96587.5	2.21635	0.00175378
221.628		505.056	204.938	-0.00590879	0	74.6562	96849.4	2.22877	0.00140669
305.12		505.056	194.375	-0.0023917	0	86.6562	96975.9	2.22877	0.00119841
269.938		505.056	216.188	-0.00234134	0	86.4688	96638.1	2.22877	0.00156666
221.802		505.056	221.969	-0.00274979	0	99.7812	96657.2	2.22877	0.00164537
221.167		505.056	215.781	0.00303246	0	116.719	96648.4	2.48136	0.00161616
159.625		505.056	226.938	0.000240703	0	120.531	96630	2.48136	0.00194053

## Sheet: 17
y	x1	x2	x3	x4	x5	x6	x7	x8	x9
154.256		772.448	213.844	0.0100631	0.25	140.469	93425.3	3.35873	0.00197544
153.141		772.448	213.5	0.0082549	0	148.344	93273.1	3.35873	0.00188547
83.1986		772.448	215.625	0.0155137	0.75	158.406	93254.4	3.35873	0.00204722
104.411		772.448	267.688	0.0387132	0	87.6562	93117.8	3.35873	0.00445381
40.3043	0.074	772.448	290.875	0.0219835	0.875	41.6875	92999.4	4.68583	0.00469
39.993	0.066	772.448	292.562	0.0620638	24.375	45.4688	92900.9	4.68583	0.00486141
26.1188	0.0845	772.448	294.844	0.101193	57	59.7188	92883.4	4.68583	0.00468775
23.7624	0.114834	772.448	295.062	0.142181	35.5	57.4062	93183.4	4.68583	0.00464328
28.4688	0.0683333	772.448	300.844	0.275774	69.875	66.8438	92760.9	5.08139	0.00524344
28.0601	0.0798	772.448	319.875	0.332599	115.75	61.1562	92470.9	5.08139	0.00610984
36.3059	0.134861	772.448	322.25	0.257524	73.5	66.0312	92694.7	5.08139	0.00708906
24.3204	0.0905	772.448	326.031	0.177712	44.125	65	92485.3	5.08139	0.00644569
28.8403	0.14755	772.448	325.875	0.327448	94.625	60.0938	92378.4	4.31913	0.00695437
29.8303	0.165133	772.448	350.594	0.188206	118	68.7188	92039.1	4.31913	0.00884013
26.4085	0.16575	772.448	373.062	0.287269	59.625	59.5938	92013.1	4.31913	0.0112564
21.076	0.13775	772.448	351.531	0.318339	222.125	70.5625	92000	4.31913	0.00915966
31.6295	0.1266	772.448	368.875	0.262842	255	68.625	91883.4	4.2407	0.0087905
18.6037	0.128972	772.448	351.719	0.256295	339.5	60.6875	92345	4.2407	0.00871256
15.6944	0.1558	772.448	357.062	0.243382	442.375	67.4375	91897.5	4.2407	0.00710881
19.0521	0.109945	772.448	346.438	0.267451	506.375	67.375	92082.2	4.2407	0.00733222
17.5	0.2025	772.448	342.375	0.223675	467.875	57.0625	92085.6	3.9571	0.00709166
20.1591	0.106417	772.448	332.906	0.287246	470	56.1562	92658.4	3.9571	0.00710253
16.7778	0.178806	772.448	338.844	0.292957	524.875	55.3125	92518.4	3.9571	0.00744784
22.4028	0.151309	772.448	323.531	0.172686	555.875	55.3438	92281.6	3.76242	0.00531266
20.0347	0.27475	772.448	313.188	0.221148	581.125	48.4375	92803.1	3.76242	0.00550975
28.2014	0.137528	772.448	296.688	0.191912	584.5	46.9062	92694.4	3.76242	0.00414141
23.1667	0.1881	772.448	272.344	0.109327	396.625	43.25	93078.8	3.76242	0.00343553
21.9028	0.1911	772.448	257	0.207402	268.625	38.625	93458.1	4.01423	0.00284259
75.7497	0.195813	772.448	264.781	0.109538	267.5	41.3125	92875.3	4.01423	0.00270659
42.3536	0.2373	772.448	267.969	0.113133	266.375	33.2188	93239.4	4.01423	0.00346394
93.725	0.251531	772.448	266.125	0.0936668	237.875	32.1562	93211.6	4.01423	0.00278028
47.3125	0.159778	772.448	255.25	0.0210525	213.5	30.0625	93406.2	3.29433	0.00339069
70.9702	0.3715	772.448	231.438	0.0544068	184	29.75	93504.4	3.29433	0.00230619
88.2031		772.448	210.156	0.000476611	130.25	44.0625	93606.2	3.29433	0.00183644
107.76		772.448	225.906	0.0106039	47.375	20.375	93822.5	3.29433	0.002102
93.2569		772.448	214.781	0.0101436	8.125	20.0625	93568.4	3.12235	0.00174075
145.033		772.448	204.719	0.0169805	0	43.9688	94256.2	3.12235	0.00161388
96.2083		772.448	219.531	0.00682514	0	47.4062	93571.9	3.12235	0.00191019
78.5583		772.448	168.969	0.00184353	0	67.75	93806.6	3.12235	0.000699562
177.722		772.448	191.125	-0.00155487	0	66.8125	93583.4	2.60107	0.00139266
177.844		772.448	198.75	-0.00113404	0	71.375	93405.6	2.60107	0.00123131
132.196		772.448	163.5	0.00686223	0	83.4062	94277.8	2.60107	0.000541062
201.321		772.448	193.594	0.0155045	0	86.1875	93890.6	2.60107	0.00103566
168.98		772.448	206.562	0.0081724	0	101.281	93347.8	3.3776	0.00167738
92.0764		772.448	203.25	0.0268114	0	110.125	93636.9	3.3776	0.00170112
146.435		1197.15	206.094	0.00900285	273.625	132	88625.3	3.32805	0.00204522
164.312		1197.15	207.781	0.00937977	263	76.4062	88460	3.32805	0.00206353
56.7222		1197.15	209.906	0.0266812	253.375	47.6875	88468.8	3.32805	0.00200075
	0.115	1197.15	260.438	0.0309721	238.125	42.7812	88493.8	3.32805	0.00401291
39.567	0.091	1197.15	281.531	0.0169935	185.75	38.5938	88314.7	4.60269	0.00421722
19.375	0.110125	1197.15	276.281	0.0786663	183.375	44.6875	88341.6	4.60269	0.00450834
27.3542	0.08575	1197.15	275.781	0.142976	241	59.1875	88370	4.60269	0.00436234
23.5139	0.183556	1197.15	276.812	0.153173	214.75	57.0938	88591.2	4.60269	0.00420491
30.5833	0.079119	1197.15	285.906	0.195955	222.75	65.6875	88310.6	5.07084	0.00477144
27.9583	0.0767083	1197.15	304.156	0.229684	246.5	59	88060.9	5.07084	0.00560363
30.4	0.153139	1197.15	306.938	0.239539	182.875	62.4688	88248.8	5.07084	0.00651088
42.0344	0.106	1197.15	308.5	0.226129	96.375	61.4688	88054.4	5.07084	0.00595394
39.6319	0.151367	1197.15	310.406	0.251753	108.625	56.7812	87949.4	4.21809	0.00671503
27.4861	0.188694	1197.15	332.656	0.233659	127.5	65.5625	87719.1	4.21809	0.00853519
32.2364	0.206563	1197.15	352.531	0.317873	68	54.3125	87670.6	4.21809	0.0106045
23.4909	0.168571	1197.15	332.656	0.293719	241.75	67.875	87659.1	4.21809	0.00883019
52.4563	0.160222	1197.15	349.781	0.301049	277.125	66.3125	87596.2	4.05487	0.00841303
17.6023	0.159167	1197.15	335.312	0.218341	354.75	59.0625	87957.5	4.05487	0.00831359
27.7	0.162333	1197.15	339.594	0.221911	453.125	65.125	87620	4.05487	0.00679884
24.0417	0.127967	1197.15	326.688	0.211937	520	65.25	87753.8	4.05487	0.00709909
25.3646	0.1672	1197.15	325.906	0.226017	490.75	54.9375	87714.7	3.7833	0.00685188
19.8919	0.116542	1197.15	318.094	0.291562	503.125	52.3438	88211.9	3.7833	0.00680413
25.4	0.184417	1197.15	321.25	0.24514	555.5	53.25	88124.1	3.7833	0.00714075
34.3064	0.133381	1197.15	305.406	0.156243	584.25	53.4062	87920.3	3.6454	0.00531103
21.7812	0.217375	1197.15	301.312	0.216293	611.625	45.6562	88336.2	3.6454	0.00557594
31.5033	0.124417	1197.15	281.469	0.148693	626.5	45.25	88216.2	3.6454	0.00431163
32.3819	0.1837	1197.15	262.719	0.118338	449.375	41.7188	88478.1	3.6454	0.00337834
26.0208	0.1866	1197.15	249.812	0.15022	330.375	37.0312	88772.8	4.12156	0.00282781
60.6667	0.1465	1197.15	252.25	0.0974872	331.625	40.3438	88351.9	4.12156	0.00268978
54.8859	0.203667	1197.15	256.219	0.102123	333.5	31.4375	88632.5	4.12156	0.00332725
91.8472	0.229452	1197.15	253.219	0.071958	325.375	31.9062	88652.8	4.12156	0.00265928
55.3438	0.139972	1197.15	241.875	0.0481545	310.75	29.8125	88728.1	3.35541	0.00311363
85.8417	0.29625	1197.15	220.906	0.0393454	289.5	29.75	88750.3	3.35541	0.00211619
72.7361		1197.15	197.969	0.00701642	235.5	50.6875	88872.5	3.35541	0.00177487
124.562		1197.15	216.531	0.0129743	174.75	39.5938	89005.6	3.35541	0.00201428
97.9271	0.352	1197.15	204.469	0.0463925	142.375	42.7188	88732.2	3.30286	0.00166969
142.369		1197.15	197.531	0.00532417	113.875	48.9375	89398.4	3.30286	0.00159662
72.5972		1197.15	211.406	0.0129958	75.75	44.6562	88790.3	3.30286	0.00176275
96.6597		1197.15	160.5	0.0219619	32.25	68.8125	88830.6	3.30286	0.000692156
129.033		1197.15	183.531	-0.00486466	1.25	70.1562	88728.1	2.68451	0.00144709
171.618		1197.15	190.281	0.00940207	0	74.5625	88536.6	2.68451	0.00111622
141.696		1197.15	158.594	0.0116022	0	85.5625	89146.9	2.68451	0.000611031
182.81		1197.15	189.531	0.0139314	0	82.1875	88958.1	2.68451	0.00123316
142.291		1197.15	201.094	0.0124027	0	94.0625	88530.9	3.77063	0.00178209
95.8125		1197.15	195.188	0.0320654	0.833333	106.094	88793.1	3.77063	0.00157984
		763.744	216.594	0.00131554	0	137.469	93253.4	3.47181	0.00207475
224		763.744	215.875	0.00529606	0	148.094	93104.4	3.47181	0.00196087
		763.744	219.219	0.00882669	0	159.938	93088.4	3.47181	0.00202178
		763.744	267.219	0.0334499	0	103.562	92952.2	3.47181	0.00436453
	0.146	763.744	290.25	0.0362753	0.875	41.9375	92844.1	4.8324	0.00468934
	0.0925	763.744	293.875	0.086082	17.5	44.2188	92718.4	4.8324	0.00491141
	0.0942143	763.744	295.969	0.160769	23.75	58.125	92700.9	4.8324	0.00474097
	0.198233	763.744	300.031	0.199806	26.375	55.5312	92995.6	4.8324	0.00463987
	0.144821	763.744	303.656	0.25288	94	65	92576.9	5.13927	0.00528925
53.2917	0.1133	763.744	322.375	0.258322	148.875	58.1875	92292.8	5.13927	0.00635109
57.5417	0.19425	763.744	326.188	0.230071	98.625	62.2188	92527.2	5.13927	0.00743862
	0.202111	763.744	327.281	0.193089	53.25	64.0625	92315.6	5.13927	0.00670125
46.0417	0.176195	763.744	327.594	0.308583	130	58.5	92205.3	4.47699	0.00719572
	0.2075	763.744	353.688	0.326615	161.125	68.125	91868.1	4.47699	0.00914644
31.1622	0.192938	763.744	374.781	0.255282	110.375	58.375	91851.2	4.47699	0.0115848
23.1667	0.138528	763.744	353.812	0.406639	271.125	69.7188	91830.3	4.47699	0.00956578
34.4763	0.150833	763.744	373.781	0.329181	294.375	64.0625	91724.7	4.41557	0.00933063
29.4583	0.117917	763.744	355.719	0.420288	359.5	58.25	92197.8	4.41557	0.00911178
17.8333	0.164933	763.744	359.375	0.35555	428.375	65.9375	91734.4	4.41557	0.00753734
	0.108467	763.744	350	0.46068	464.75	65.75	91909.7	4.41557	0.00760378
28.75	0.18	763.744	345.594	0.443982	430.5	55.6875	91928.4	4.1461	0.00737306
20.6407	0.105625	763.744	335.812	0.400207	420	54.375	92499.7	4.1461	0.00745834
31.0938	0.158028	763.744	342.188	0.395309	467.25	53.4062	92353.4	4.1461	0.00771069
40.2242	0.136262	763.744	325.844	0.368923	493.375	54.2812	92102.2	3.92852	0.00552769
18.5833	0.2256	763.744	316.781	0.292043	491.875	47.0625	92640.3	3.92852	0.00577312
40.7292	0.109643	763.744	300.062	0.30325	423.375	45.2188	92526.6	3.92852	0.00431319
37.5521	0.1431	763.744	275.781	0.0948721	203.375	40.9062	92922.2	3.92852	0.00353903
23.5556	0.170542	763.744	262.625	0.262619	56.75	36.0312	93300.3	3.93989	0.00300766
85.6612	0.189786	763.744	265.625	0.196087	43.375	40.5938	92700.3	3.93989	0.00282628
64.4617	0.228033	763.744	270.781	0.138139	18.875	31.4375	93069.7	3.93989	0.00357822
129.933	0.286571	763.744	267.406	0.135271	2	31.125	93035.9	3.93989	0.00291334
53.75	0.182333	763.744	256.781	0.147289	0	29.0312	93229.1	3.26109	0.00349678
89.119	0.3855	763.744	233.656	0.065236	0	29.8125	93337.5	3.26109	0.00237403
79.9688	0.257667	763.744	211.219	0.0931987	0	49.6562	93427.8	3.26109	0.00208469
116.808		763.744	227.875	0.0175903	0	34.2812	93661.6	3.26109	0.00218644
91.1964	0.204	763.744	215.125	0.0231654	0	33.9688	93417.2	3.07917	0.00180447
128.48		763.744	204.781	0.0209085	0	47.0625	94093.1	3.07917	0.00153975
115.133		763.744	220.531	0.00628936	0	49.75	93395.6	3.07917	0.00187716
123.899		763.744	168.906	0.0134533	0	67.8438	93634.7	3.07917	0.000711531
257.854		763.744	190.844	0.00880704	0	67.625	93416.9	2.61239	0.00123331
254.775		763.744	202	0.00449461	0	68.9688	93241.6	2.61239	0.00125781
140.069		763.744	167.75	0.0148856	0	82.3125	94130.6	2.61239	0.000572937
278.275		763.744	195.281	0.0110787	0	86.5938	93733.1	2.61239	0.00105084
177.918		763.744	207.781	0.0114225	0	102.094	93184.7	3.15126	0.00160091
108.903		763.744	206.531	0.0134764	0	110.562	93465.3	3.15126	0.00165628
95.4167		772.448	213.844	0.00146281	0	140.469	93425.3	3.35873	0.00197544
158.521		772.448	213.5	0.00494857	0	148.344	93273.1	3.35873	0.00188547
95.8829		772.448	215.625	0.0203072	0	158.406	93254.4	3.35873	0.00204722
		772.448	267.688	0.0198727	0	87.6562	93117.8	3.35873	0.00445381
46	0.052	772.448	290.875	0.0236934	0.875	41.6875	92999.4	4.68583	0.00469
33.6667	0.0645	772.448	292.562	0.0542371	22.875	45.4688	92900.9	4.68583	0.00486141
22.8333	0.075	772.448	294.844	0.110647	38.5	59.7188	92883.4	4.68583	0.00468775
	0.1255	772.448	295.062	0.153144	20.125	57.4062	93183.4	4.68583	0.00464328
32.3958	0.0716547	772.448	300.844	0.240472	72.875	66.8438	92760.9	5.08139	0.00524344
22.3539	0.0699	772.448	319.875	0.322891	131	61.1562	92470.9	5.08139	0.00610984
27.2379	0.155306	772.448	322.25	0.206665	92.25	66.0312	92694.7	5.08139	0.00708906
27	0.10075	772.448	326.031	0.168709	51.25	65	92485.3	5.08139	0.00644569
35.6944	0.138017	772.448	325.875	0.266138	112.875	60.0938	92378.4	4.31913	0.00695437
36.4768	0.177967	772.448	350.594	0.205832	144.625	68.7188	92039.1	4.31913	0.00884013
25.127	0.178778	772.448	373.062	0.254683	93.5	59.5938	92013.1	4.31913	0.0112564
18.3471	0.150528	772.448	351.531	0.311474	246.25	70.5625	92000	4.31913	0.00915966
26.9937	0.1401	772.448	368.875	0.240842	271.375	68.625	91883.4	4.2407	0.0087905
17.0681	0.132733	772.448	351.719	0.236477	334.25	60.6875	92345	4.2407	0.00871256
30.5333	0.148167	772.448	357.062	0.236311	416.125	67.4375	91897.5	4.2407	0.00710881
27.1833	0.10975	772.448	346.438	0.252865	459.625	67.375	92082.2	4.2407	0.00733222
28.9702	0.1514	772.448	342.375	0.26826	417.125	57.0625	92085.6	3.9571	0.00709166
21.6562	0.112709	772.448	332.906	0.268281	407.875	56.1562	92658.4	3.9571	0.00710253
20.994	0.1747	772.448	338.844	0.279969	454.25	55.3125	92518.4	3.9571	0.00744784
21.6389	0.1465	772.448	323.531	0.181799	480.625	55.3438	92281.6	3.76242	0.00531266
22.119	0.2035	772.448	313.188	0.20917	488	48.4375	92803.1	3.76242	0.00550975
31.1307	0.117555	772.448	296.688	0.129644	458.5	46.9062	92694.4	3.76242	0.00414141
31.1181	0.1815	772.448	272.344	0.146682	246.25	43.25	93078.8	3.76242	0.00343553
29.0667	0.174875	772.448	257	0.144788	108.25	38.625	93458.1	4.01423	0.00284259
76.5939	0.179938	772.448	264.781	0.100074	99.625	41.3125	92875.3	4.01423	0.00270659
59.622	0.2295	772.448	267.969	0.0771514	92	33.2188	93239.4	4.01423	0.00346394
126.16	0.239524	772.448	266.125	0.0750068	24	32.1562	93211.6	4.01423	0.00278028
57.5069	0.136667	772.448	255.25	0.027293	0.375	30.0625	93406.2	3.29433	0.00339069
79.9306	0.431	772.448	231.438	0.0289033	0	29.75	93504.4	3.29433	0.00230619
80.4792	0.267	772.448	210.156	-0.00225993	0	44.0625	93606.2	3.29433	0.00183644
167.858		772.448	225.906	0.0101862	0	20.375	93822.5	3.29433	0.002102
97.0694	0.186333	772.448	214.781	0.00887695	0	20.0625	93568.4	3.12235	0.00174075
157.486		772.448	204.719	0.00100939	0	43.9688	94256.2	3.12235	0.00161388
120.175		772.448	219.531	-0.00440663	0	47.4062	93571.9	3.12235	0.00191019
100.562		772.448	168.969	-0.0083755	0	67.75	93806.6	3.12235	0.000699562
214.042		772.448	191.125	-0.0106952	0	66.8125	93583.4	2.60107	0.00139266
156.299		772.448	198.75	-0.0113467	0	71.375	93405.6	2.60107	0.00123131
80.5298		772.448	163.5	0.00190366	0	83.4062	94277.8	2.60107	0.000541062
125.458		772.448	193.594	0.0026171	0	86.1875	93890.6	2.60107	0.00103566
116.02		772.448	206.562	0.00389511	0	101.281	93347.8	3.3776	0.00167738
126.292		772.448	203.25	0.00449737	0	110.125	93636.9	3.3776	0.00170112
170.583		772.448	213.844	0.00957797	0.25	140.469	93425.3	3.29216	0.00197544
218.167		772.448	213.5	0.00712514	0	148.344	93273.1	3.29216	0.00188547
86.0139		772.448	215.625	0.0200019	0.75	158.406	93254.4	3.29216	0.00204722
119.208		772.448	267.688	0.0314694	0	87.6562	93117.8	3.29216	0.00445381
33.0435		772.448	290.875	0.0100269	0.75	41.6875	92999.4	4.65164	0.00469
30	0.0898333	772.448	292.562	0.0624194	24.625	45.4688	92900.9	4.65164	0.00486141
26.2083	0.0765	772.448	294.844	0.118187	55.25	59.7188	92883.4	4.65164	0.00468775
22.2346	0.185778	772.448	295.062	0.129546	26.5	57.4062	93183.4	4.65164	0.00464328
27.9583	0.0577261	772.448	300.844	0.253091	57.25	66.8438	92760.9	5.07072	0.00524344
20.0417	0.0863666	772.448	319.875	0.253221	90.75	61.1562	92470.9	5.07072	0.00610984
17.6333	0.143722	772.448	322.25	0.20531	47.125	66.0312	92694.7	5.07072	0.00708906
	0.116917	772.448	326.031	0.170363	33.25	65	92485.3	5.07072	0.00644569
	0.145233	772.448	325.875	0.311508	94.75	60.0938	92378.4	4.26266	0.00695437
19.741	0.15175	772.448	350.594	0.225923	112.125	68.7188	92039.1	4.26266	0.00884013
22.6498	0.152625	772.448	373.062	0.272709	45.375	59.5938	92013.1	4.26266	0.0112564
18.8829	0.157917	772.448	351.531	0.292026	199.75	70.5625	92000	4.26266	0.00915966
23.3433	0.16775	772.448	368.875	0.276762	231	68.625	91883.4	4.16484	0.0087905
14.2644	0.151875	772.448	351.719	0.242699	311.875	60.6875	92345	4.16484	0.00871256
22.6528	0.1688	772.448	357.062	0.193712	414.625	67.4375	91897.5	4.16484	0.00710881
21.1667	0.122444	772.448	346.438	0.238659	482.5	67.375	92082.2	4.16484	0.00733222
43.875	0.1589	772.448	342.375	0.230817	446.75	57.0625	92085.6	3.90515	0.00709166
16.9583	0.142084	772.448	332.906	0.273733	448.75	56.1562	92658.4	3.90515	0.00710253
18.25	0.188805	772.448	338.844	0.283939	502.125	55.3125	92518.4	3.90515	0.00744784
23.583	0.139595	772.448	323.531	0.157476	539.125	55.3438	92281.6	3.70966	0.00531266
23.1319	0.2097	772.448	313.188	0.233081	569.25	48.4375	92803.1	3.70966	0.00550975
29.9583	0.125555	772.448	296.688	0.17997	585.125	46.9062	92694.4	3.70966	0.00414141
31.725	0.1805	772.448	272.344	0.180873	405.625	43.25	93078.8	3.70966	0.00343553
31.2604	0.2006	772.448	257	0.181619	278.125	38.625	93458.1	4.06453	0.00284259
66.2829	0.168063	772.448	264.781	0.144815	277.625	41.3125	92875.3	4.06453	0.00270659
45.6062	0.2296	772.448	267.969	0.109925	276.5	33.2188	93239.4	4.06453	0.00346394
78.7292	0.260719	772.448	266.125	0.11909	246.25	32.1562	93211.6	4.06453	0.00278028
51.5	0.130972	772.448	255.25	0.0233662	218	30.0625	93406.2	3.32708	0.00339069
71.4531	0.341667	772.448	231.438	0.0508967	188.375	29.75	93504.4	3.32708	0.00230619
100.633		772.448	210.156	0.00445514	136.625	44.0625	93606.2	3.32708	0.00183644
121.125		772.448	225.906	0.0109325	60.5	20.375	93822.5	3.32708	0.002102
93.8681	0.192	772.448	214.781	0.00858596	19	20.0625	93568.4	3.18168	0.00174075
137.871		772.448	204.719	0.0252209	0	43.9688	94256.2	3.18168	0.00161388
98.8833		772.448	219.531	0.00215898	0	47.4062	93571.9	3.18168	0.00191019
89.8542		772.448	168.969	-0.00322729	0	67.75	93806.6	3.18168	0.000699562
162.479		772.448	191.125	-0.00450585	0	66.8125	93583.4	2.61851	0.00139266
235.133		772.448	198.75	0.00612707	0	71.375	93405.6	2.61851	0.00123131
136.097		772.448	163.5	0.00646493	0	83.4062	94277.8	2.61851	0.000541062
184.75		772.448	193.594	0.0120342	0	86.1875	93890.6	2.61851	0.00103566
165.939		772.448	206.562	0.00611977	0	101.281	93347.8	3.52725	0.00167738
91.1736		772.448	203.25	0.00586222	0	110.125	93636.9	3.52725	0.00170112
		763.744	216.594	0.00496555	0	137.469	93253.4	3.32532	0.00207475
		763.744	215.875	0.00496312	0	148.094	93104.4	3.32532	0.00196087
		763.744	219.219	0.00646278	0	159.938	93088.4	3.32532	0.00202178
		763.744	267.219	0.0544286	0	103.562	92952.2	3.32532	0.00436453
	0.15	763.744	290.25	0.033067	1.5	41.9375	92844.1	4.65501	0.00468934
	0.09225	763.744	293.875	0.0659589	32.125	44.2188	92718.4	4.65501	0.00491141
	0.0927	763.744	295.969	0.125246	55.25	58.125	92700.9	4.65501	0.00474097
	0.1641	763.744	300.031	0.170854	23.75	55.5312	92995.6	4.65501	0.00463987
	0.0917857	763.744	303.656	0.29065	82	65	92576.9	5.01681	0.00528925
	0.102933	763.744	322.375	0.310438	124.375	58.1875	92292.8	5.01681	0.00635109
	0.171833	763.744	326.188	0.31255	56.375	62.2188	92527.2	5.01681	0.00743862
	0.1925	763.744	327.281	0.183072	33.5	64.0625	92315.6	5.01681	0.00670125
	0.153056	763.744	327.594	0.253365	113.125	58.5	92205.3	4.30617	0.00719572
	0.213479	763.744	353.688	0.327554	142.5	68.125	91868.1	4.30617	0.00914644
	0.1265	763.744	374.781	0.237969	80.625	58.375	91851.2	4.30617	0.0115848
	0.148917	763.744	353.812	0.374625	226.375	69.7188	91830.3	4.30617	0.00956578
	0.1607	763.744	373.781	0.212818	244	64.0625	91724.7	4.23185	0.00933063
	0.1292	763.744	355.719	0.338043	302.25	58.25	92197.8	4.23185	0.00911178
	0.158067	763.744	359.375	0.250619	372.625	65.9375	91734.4	4.23185	0.00753734
	0.128972	763.744	350	0.326572	407.375	65.75	91909.7	4.23185	0.00760378
	0.17425	763.744	345.594	0.2636	376.125	55.6875	91928.4	3.94257	0.00737306
	0.122625	763.744	335.812	0.287692	376.375	54.375	92499.7	3.94257	0.00745834
	0.191	763.744	342.188	0.346806	423.125	53.4062	92353.4	3.94257	0.00771069
	0.147595	763.744	325.844	0.317943	447.75	54.2812	92102.2	3.76107	0.00552769
	0.2105	763.744	316.781	0.266132	438.25	47.0625	92640.3	3.76107	0.00577312
	0.131857	763.744	300.062	0.277091	371.5	45.2188	92526.6	3.76107	0.00431319
	0.1848	763.744	275.781	0.167527	148.75	40.9062	92922.2	3.76107	0.00353903
	0.189125	763.744	262.625	0.171226	13	36.0312	93300.3	3.87273	0.00300766
	0.2	763.744	265.625	0.215644	11.875	40.5938	92700.3	3.87273	0.00282628
	0.2674	763.744	270.781	0.161055	4.75	31.4375	93069.7	3.87273	0.00357822
	0.243857	763.744	267.406	0.129182	1.875	31.125	93035.9	3.87273	0.00291334
	0.159805	763.744	256.781	0.130731	0	29.0312	93229.1	3.19929	0.00349678
	0.409	763.744	233.656	0.0792477	0	29.8125	93337.5	3.19929	0.00237403
		763.744	211.219	0.0946642	0	49.6562	93427.8	3.19929	0.00208469
		763.744	227.875	0.00335735	0	34.2812	93661.6	3.19929	0.00218644
		763.744	215.125	0.0316746	0	33.9688	93417.2	2.98848	0.00180447
		763.744	204.781	0.0170276	0	47.0625	94093.1	2.98848	0.00153975
		763.744	220.531	0.00381987	0	49.75	93395.6	2.98848	0.00187716
		763.744	168.906	0.00854272	0	67.8438	93634.7	2.98848	0.000711531
		763.744	190.844	0.00996186	0	67.625	93416.9	2.5062	0.00123331
		763.744	202	-0.00144448	0	68.9688	93241.6	2.5062	0.00125781
		763.744	167.75	0.00893691	0	82.3125	94130.6	2.5062	0.000572937
		763.744	195.281	0.013727	0	86.5938	93733.1	2.5062	0.00105084
		763.744	207.781	0.0118049	0	102.094	93184.7	3.18879	0.00160091
		763.744	206.531	0.00570719	0	110.562	93465.3	3.18879	0.00165628
138.979		772.448	213.844	-0.00340698	0	140.469	93425.3	3.45823	0.00197544
120.792		772.448	213.5	0.0046758	0	148.344	93273.1	3.45823	0.00188547
47.6979		772.448	215.625	0.0300014	0	158.406	93254.4	3.45823	0.00204722
86.0417		772.448	267.688	0.0388924	0	87.6562	93117.8	3.45823	0.00445381
	0.234	772.448	290.875	0.0243458	0.125	41.6875	92999.4	4.82303	0.00469
	0.20175	772.448	292.562	0.0783111	5.75	45.4688	92900.9	4.82303	0.00486141
20.2708	0.129714	772.448	294.844	0.114426	1	59.7188	92883.4	4.82303	0.00468775
11.4583	0.1846	772.448	295.062	0.188697	14.875	57.4062	93183.4	4.82303	0.00464328
	0.0780596	772.448	300.844	0.280559	58.5	66.8438	92760.9	5.18051	0.00524344
19.6528	0.0714666	772.448	319.875	0.221542	96.875	61.1562	92470.9	5.18051	0.00610984
26.0833	0.147722	772.448	322.25	0.242866	68.5	66.0312	92694.7	5.18051	0.00708906
23.4656	0.09925	772.448	326.031	0.227498	39.875	65	92485.3	5.18051	0.00644569
22.4792	0.148042	772.448	325.875	0.223094	99.875	60.0938	92378.4	4.39844	0.00695437
23.4583	0.141333	772.448	350.594	0.301244	119.875	68.7188	92039.1	4.39844	0.00884013
22.7812	0.1515	772.448	373.062	0.206255	62	59.5938	92013.1	4.39844	0.0112564
19.0357	0.143833	772.448	351.531	0.336167	218.125	70.5625	92000	4.39844	0.00915966
26.6528	0.202958	772.448	368.875	0.237948	248.75	68.625	91883.4	4.34195	0.0087905
20.0216	0.131	772.448	351.719	0.276342	336.75	60.6875	92345	4.34195	0.00871256
	0.167733	772.448	357.062	0.230047	432.375	67.4375	91897.5	4.34195	0.00710881
21.1319	0.131055	772.448	346.438	0.266832	488.125	67.375	92082.2	4.34195	0.00733222
16.7708	0.1621	772.448	342.375	0.216995	442.625	57.0625	92085.6	4.09999	0.00709166
13.3144	0.127959	772.448	332.906	0.255678	431.25	56.1562	92658.4	4.09999	0.00710253
16.3264	0.190667	772.448	338.844	0.277638	477.125	55.3125	92518.4	4.09999	0.00744784
23.4405	0.142972	772.448	323.531	0.193176	511.25	55.3438	92281.6	3.86436	0.00531266
23.7396	0.22825	772.448	313.188	0.23368	532.25	48.4375	92803.1	3.86436	0.00550975
32.9407	0.122833	772.448	296.688	0.193261	534.375	46.9062	92694.4	3.86436	0.00414141
20.2083	0.1821	772.448	272.344	0.140995	348	43.25	93078.8	3.86436	0.00343553
35.6111	0.186133	772.448	257	0.225695	210.625	38.625	93458.1	4.12382	0.00284259
59.0476	0.208896	772.448	264.781	0.10599	205.375	41.3125	92875.3	4.12382	0.00270659
56.5286	0.239	772.448	267.969	0.0753009	187.625	33.2188	93239.4	4.12382	0.00346394
97.0417	0.292821	772.448	266.125	0.119817	102.75	32.1562	93211.6	4.12382	0.00278028
74.0417	0.184633	772.448	255.25	0.064132	63.75	30.0625	93406.2	3.40552	0.00339069
72.0583	0.34275	772.448	231.438	0.0645107	27.375	29.75	93504.4	3.40552	0.00230619
102.099	0.259625	772.448	210.156	0.0188352	1.125	44.0625	93606.2	3.40552	0.00183644
109.594	0.375	772.448	225.906	0.0273256	0	20.375	93822.5	3.40552	0.002102
95.9643	0.213333	772.448	214.781	0.0424285	0	20.0625	93568.4	3.23502	0.00174075
143.19		772.448	204.719	0.00675504	0	43.9688	94256.2	3.23502	0.00161388
25.8264		772.448	219.531	-0.00542853	0	47.4062	93571.9	3.23502	0.00191019
47.8274		772.448	168.969	-0.00362984	0	67.75	93806.6	3.23502	0.000699562
213.323		772.448	191.125	-0.000450174	0	66.8125	93583.4	2.71642	0.00139266
218.979		772.448	198.75	-0.00466035	0	71.375	93405.6	2.71642	0.00123131
103.13		772.448	163.5	-0.000161676	0	83.4062	94277.8	2.71642	0.000541062
225.533		772.448	193.594	0.000969562	0	86.1875	93890.6	2.71642	0.00103566
187.708		772.448	206.562	0.00124926	0	101.281	93347.8	3.46789	0.00167738
103.083		772.448	203.25	-0.000308244	0	110.125	93636.9	3.46789	0.00170112
67.1153		426.848	214.219	0.0109768	0	158.812	97584.4	4.78506	0.00152256
54.37		426.848	235.406	0.0105711	0	163	97433.8	4.78506	0.00204434
50.8102		426.848	238.719	0.0506697	0	177.938	97432.2	4.78506	0.00246138
41.6406	0.136833	426.848	296.344	0.0871441	0	38.25	97134.1	4.78506	0.004589
23.1498		426.848	295.281	0.0660666	3.875	44.6875	96955	6.97786	0.00430966
15.5299	0.150167	426.848	308.25	0.0933777	56.125	43.3125	96655.3	6.97786	0.00525622
11.8432	0.0905	426.848	304.719	0.150047	113.75	56.7812	96633.4	6.97786	0.005419
11.6097	0.152125	426.848	301.188	0.184097	162.375	61.6562	96968.8	6.97786	0.00464481
14.0917	0.103694	426.848	323.594	0.322826	265	62.5938	96475	6.46405	0.00509319
14.4796	0.0931668	426.848	337.844	0.318281	116.25	65.0312	96163.8	6.46405	0.00549103
13.2257	0.15475	426.848	340.219	0.103491	133.875	68.1562	96372.2	6.46405	0.00621825
13.7308	0.174875	426.848	352.531	0.249132	136.375	64.8438	96077.2	6.46405	0.00602662
15.1771	0.117222	426.848	344	0.385794	180	62.0312	96019.1	5.85351	0.00627009
21.0178	0.183533	426.848	387.906	0.129443	166.625	69.5938	95616.6	5.85351	0.00879259
12.9345	0.147667	426.848	400.344	0.273965	117.875	62.75	95561.2	5.85351	0.0103577
12.6156	0.125958	426.848	372.281	0.229082	257.875	70.7812	95567.8	5.85351	0.00830431
16.6006	0.134375	426.848	398.219	0.253133	271.5	70.7812	95427.8	5.00237	0.00723353
12.1146	0.151333	426.848	372.344	0.273534	312.875	64.4375	95987.5	5.00237	0.00741759
14.0278	0.121555	426.848	380.438	0.198443	408.625	72.9688	95435.3	5.00237	0.00660216
13.7656	0.12625	426.848	374.875	0.255068	394.75	64.1562	95673.1	5.00237	0.00792081
12.7619	0.126367	426.848	364.094	0.313358	355.375	57.6875	95756.9	5.10921	0.00692984
10.5788	0.140333	426.848	346	0.27699	408.625	59.625	96396.6	5.10921	0.00595606
14.9653	0.181833	426.848	358.375	0.268131	464.5	55.5938	96144.4	5.10921	0.00655853
17.6763	0.123	426.848	346.031	0.243619	340.125	54.4375	95913.1	5.50539	0.00597537
15.1786	0.142125	426.848	336.062	0.33423	361.125	42.1875	96634.1	5.50539	0.00651353
16.2255	0.115583	426.848	315.531	0.1071	380.625	47.5625	96471.2	5.50539	0.00515219
16.5357	0.153667	426.848	291.344	0.230653	251.75	37.5	97084.7	5.50539	0.00438281
13.2778	0.120667	426.848	280.281	0.165246	238.5	32.9688	97521.2	5.38237	0.00348331
28.6555	0.204667	426.848	274.188	0.153285	237.5	38.625	96792.5	5.38237	0.00388706
19.0417	0.1775	426.848	284.75	0.0844572	220.625	28.5938	97144.4	5.38237	0.00439031
29.8194	0.26825	426.848	290.188	0.0579244	152.25	20.125	97228.4	5.38237	0.00457231
15.7708	0.0753335	426.848	276.688	0.063646	89.875	25.5	97408.8	4.77436	0.00414156
35.0417	0.322667	426.848	248.125	0.0969462	54.5	20.7812	97625	4.77436	0.00267081
33.6786	0.204056	426.848	221.906	0.0533921	11.5	23.4062	97733.1	4.77436	0.00183347
33.9643	0.3135	426.848	230.562	0.0673425	0	19.1562	98014.1	4.77436	0.00200747
38.1528	0.323	426.848	221.906	0.0748005	0	17.0312	97799.1	4.85554	0.00161853
65.5869		426.848	202.188	0.0823152	0	40.6562	98548.4	4.85554	0.00122241
59.7024		426.848	226.938	0.0197408	0	42.5	97762.5	4.85554	0.00178044
24.925		426.848	192.781	0.0174741	0	29.4375	98178.4	4.85554	0.00117166
112.62		426.848	204.094	0.0103368	0	54.75	97912.8	3.73714	0.00109456
44.9643		426.848	199.656	0.0276173	0	66.375	97743.1	3.73714	0.000980281
30.5885		426.848	151.094	0.0121653	0	88.375	98823.8	3.73714	0.000421469
70.0885		426.848	190.656	0.0159618	0	91.25	98267.2	3.73714	0.000855594
65.5481		426.848	201.594	0.0289197	0	104.969	97606.2	4.88354	0.00121988
27.9323		426.848	211.469	0.0332918	0	116.938	97890	4.88354	0.00151884
45.5605		426.848	208	0.0137451	0	158.812	97584.4	5.12815	0.00152256
31.4374		426.848	232.969	0.0139452	0	163	97433.8	5.12815	0.00204434
27.1803		426.848	229.531	0.0601831	0	177.938	97432.2	5.12815	0.00246138
19.506	0.162	426.848	280.281	0.119684	0	38.25	97134.1	5.12815	0.004589
7.38442	0.1885	426.848	285.438	0.0874778	4.125	44.6875	96955	6.95088	0.00430966
10.8148	0.153667	426.848	280.406	0.0865155	56.75	43.3125	96655.3	6.95088	0.00525622
11.1042	0.0614443	426.848	267.094	0.161943	120.875	56.7812	96633.4	6.95088	0.005419
9.31341	0.124583	426.848	264.625	0.242207	173.125	61.6562	96968.8	6.95088	0.00464481
10.7667	0.0982778	426.848	285.281	0.328583	286.25	62.5938	96475	6.48623	0.00509319
11.6458	0.110639	426.848	296.469	0.373935	134.875	65.0312	96163.8	6.48623	0.00549103
7.81515	0.149875	426.848	298.375	0.157766	158.25	68.1562	96372.2	6.48623	0.00621825
9.91667	0.203125	426.848	308.688	0.288216	171.625	64.8438	96077.2	6.48623	0.00602662
7.70833	0.0975417	426.848	304.469	0.312733	221.25	62.0312	96019.1	5.83949	0.00627009
12.7701	0.1824	426.848	339.969	0.251745	211.625	69.5938	95616.6	5.83949	0.00879259
12.2738	0.179444	426.848	346.719	0.286959	170.75	62.75	95561.2	5.83949	0.0103577
9.94643	0.19275	426.848	324.812	0.33454	315.875	70.7812	95567.8	5.83949	0.00830431
15.2777	0.176	426.848	356.281	0.31479	330.375	70.7812	95427.8	4.99401	0.00723353
10.5417	0.145875	426.848	337.375	0.392619	371.25	64.4375	95987.5	4.99401	0.00741759
15.0667	0.131333	426.848	331.406	0.306031	460	72.9688	95435.3	4.99401	0.00660216
14.3988	0.13525	426.848	325.125	0.246048	440	64.1562	95673.1	4.99401	0.00792081
14.7847	0.146333	426.848	322.625	0.338349	399	57.6875	95756.9	5.10791	0.00692984
12.1591	0.12925	426.848	304.844	0.353966	453.375	59.625	96396.6	5.10791	0.00595606
15.375	0.176611	426.848	314.125	0.338914	502	55.5938	96144.4	5.10791	0.00655853
15.2679	0.0945	426.848	303.656	0.280695	366.25	54.4375	95913.1	5.6839	0.00597537
12.7708	0.147467	426.848	309.562	0.38923	384.75	42.1875	96634.1	5.6839	0.00651353
12.3329	0.107107	426.848	274.469	0.149616	404.5	47.5625	96471.2	5.6839	0.00515219
15.0625	0.164875	426.848	274.125	0.26805	271	37.5	97084.7	5.6839	0.00438281
10.1319	0.100042	426.848	261.531	0.20657	256.5	32.9688	97521.2	5.72525	0.00348331
25.1603	0.167972	426.848	260.75	0.204317	253.625	38.625	96792.5	5.72525	0.00388706
18.4375	0.135833	426.848	259.938	0.107588	238.625	28.5938	97144.4	5.72525	0.00439031
26.4833	0.266458	426.848	284.594	0.0804414	180.875	20.125	97228.4	5.72525	0.00457231
19.7778	0.0354165	426.848	252.188	0.101902	122.375	25.5	97408.8	5.14548	0.00414156
35.7014	0.3105	426.848	237.875	0.106844	90.125	20.7812	97625	5.14548	0.00267081
34.75	0.142778	426.848	202.844	0.0757158	52.375	23.4062	97733.1	5.14548	0.00183347
32.3631	0.27	426.848	221.5	0.0678217	6.375	19.1562	98014.1	5.14548	0.00200747
33.0069	0.2865	426.848	208.594	0.0975154	0	17.0312	97799.1	5.34592	0.00161853
29.5111		426.848	192.344	0.0552513	0	40.6562	98548.4	5.34592	0.00122241
32.2333		426.848	221.781	0.0453187	0	42.5	97762.5	5.34592	0.00178044
17.0139		426.848	172.219	0.0292799	0	29.4375	98178.4	5.34592	0.00117166
94.7		426.848	196.719	0.0296993	0	54.75	97912.8	4.26546	0.00109456
35.1146		426.848	194.875	0.0488517	0	66.375	97743.1	4.26546	0.000980281
24.8393		426.848	136.906	0.0332788	0	88.375	98823.8	4.26546	0.000421469
59.9762		426.848	193.938	0.022518	0	91.25	98267.2	4.26546	0.000855594
56.904		426.848	203.562	0.0370037	0	104.969	97606.2	5.33156	0.00121988
26.7321		426.848	202.094	0.036125	0	116.938	97890	5.33156	0.00151884
44.1927		1547.74	224.469	0.0572114	0	156.594	84935.3	4.47332	0.00185594
26.0967		1547.74	248.438	0.0524676	0	154.938	84773.1	4.47332	0.00217347
25.1737		1547.74	249.125	0.0355377	0	129.25	84789.4	4.47332	0.00213912
12.9479	0.092375	1547.74	300.469	0.0332493	0	41.5938	84893.4	4.47332	0.00430259
8.29318	0.2435	1547.74	303.469	0.0410681	4.625	41.5	84762.2	6.80998	0.00381181
8.43954	0.176917	1547.74	315.406	0.0945063	36.125	54.4375	84732.8	6.80998	0.00462359
6.55833	0.0910557	1547.74	312.625	0.094274	73.25	59.0938	84836.2	6.80998	0.00518394
5.91123	0.154333	1547.74	312.406	0.119756	90	63.4062	85025	6.80998	0.00462353
6.51389	0.162119	1547.74	331.812	0.128236	162.125	62.0312	84802.2	6.37803	0.00565753
7.68623	0.13907	1547.74	347.719	0.0864896	36.75	63.4688	84638.4	6.37803	0.00591869
6.8004	0.1841	1547.74	347.844	0.0972049	37.5	66.2812	84792.8	6.37803	0.00579894
6.51268	0.226	1547.74	362.344	0.0965235	48.5	62.9062	84580	6.37803	0.00632666
5.67262	0.148	1547.74	352.906	0.0888739	131.375	59.5	84480.9	5.28957	0.0066685
8.89461	0.166125	1547.74	392.75	0.122188	76.875	68.1562	84350	5.28957	0.00912012
12.7	0.190444	1547.74	405.719	0.0883387	46.25	64.625	84298.8	5.28957	0.0100927
20.4305	0.157222	1547.74	385.906	0.0581516	238.75	74.25	84254.1	5.28957	0.00857841
23.978	0.1755	1547.74	405	0.120198	264.25	64.8438	84255.3	4.66807	0.00794584
16.973	0.165333	1547.74	383.312	0.122322	283.375	44.4062	84592.5	4.66807	0.00757747
19.5069	0.1449	1547.74	386.25	0.112103	365	77.6875	84267.8	4.66807	0.00748722
18.7396	0.11025	1547.74	382.875	0.104615	329	67.3438	84374.4	4.66807	0.00835756
18.9931	0.157667	1547.74	372.75	0.154243	255.375	59.7188	84350.6	4.67039	0.00760937
15.0444	0.1025	1547.74	355.625	0.125137	251.75	55.4375	84799.1	4.67039	0.00603203
19.4643	0.2576	1547.74	364.969	0.140705	315	54.7188	84704.4	4.67039	0.00717678
19.4121	0.111067	1547.74	356.125	0.185007	217.125	52.7812	84488.8	5.22883	0.00630209
21.2	0.137056	1547.74	337.219	0.0378537	220.75	37.4688	84895.3	5.22883	0.00695163
17.6875	0.128476	1547.74	323.938	0.120299	230.25	53.9688	84742.8	5.22883	0.004987
19.6667	0.191	1547.74	294.469	0.120778	66.625	38.5938	84946.6	5.22883	0.00431556
19.4306	0.0985	1547.74	284.062	0.104897	50.5	32.7812	85214.7	4.53617	0.00336059
31.4121	0.199357	1547.74	277.969	0.0597331	59	38.3438	84815.9	4.53617	0.00418594
27.8363	0.16	1547.74	290.062	0.0371805	31.125	29.2188	85049.4	4.53617	0.00410003
31.3036	0.2915	1547.74	291.938	0.0347146	1.5	33.1875	85042.2	4.53617	0.00483497
19.5573	0.07575	1547.74	284.812	0.0803708	0	30.6562	85080.6	4.57244	0.00363856
36.381	0.28125	1547.74	250	0.0407769	0	23.3125	85066.2	4.57244	0.00253194
38.0521	0.179125	1547.74	228.344	0.039645	0	25	85161.6	4.57244	0.00174613
36.0536	0.352	1547.74	235.719	0.059585	0	20.4062	85318.4	4.57244	0.00207978
46.5476	0.299833	1547.74	224.375	0.0430982	0	31.8438	85048.4	4.21831	0.00166819
69.0119	0.23725	1547.74	205.062	0.0191951	0	53.9688	85655	4.21831	0.00132534
62.1198	0.05	1547.74	229.281	-0.00031423	0	50.75	85007.8	4.21831	0.00180653
38.8869	0.126	1547.74	189.312	-0.00165252	0	59.5	85031.2	4.21831	0.00085725
114.167		1547.74	201.062	0.00607179	0	67.625	84948.4	3.40713	0.00118931
46.4286		1547.74	203.844	0.0243891	0	75.5312	84766.9	3.40713	0.00115681
41.6979		1547.74	154.125	0.0733417	0	96.7188	85279.4	3.40713	0.000374125
87.25		1547.74	193.75	0.066607	0	91.0938	85190	3.40713	0.00111088
71.6925		1547.74	200.406	0.0310297	0	99.9688	84809.7	4.36056	0.00143325
38.5573		1547.74	215.219	0.0203259	0.166667	119.688	85015.9	4.36056	0.00163922
62.4629		245.728	230.062	-0.00748093	0	154.75	99911.2	3.11074	0.00165166
66.1769		245.728	267.062	0.00452656	0	159.156	99756.6	3.11074	0.00219475
49.8114		245.728	265.469	0.000750704	0	172.594	99748.1	3.11074	0.00248222
57.5655		245.728	303.031	0.0105451	0	37.4062	99375.3	3.11074	0.00467844
21.6479		245.728	291.312	0.0346757	2.125	41.0938	99195	3.81135	0.00460397
22.7731	0.0754443	245.728	308.844	0.0377847	21.875	39.4688	98858.4	3.81135	0.00551256
14.176	0.173833	245.728	302.562	0.136812	63.375	53.3125	98812.5	3.81135	0.00576053
16.9612	0.134444	245.728	308.312	0.188466	73.75	57.5	99177.8	3.81135	0.00483412
17.4464	0.131583	245.728	317.625	0.302211	170.375	62.7188	98602.5	3.98001	0.0051715
19.0978	0.0752666	245.728	338.219	0.345193	120.125	61.75	98257.8	3.98001	0.00576788
16.123	0.19225	245.728	337.906	0.262815	10.875	66	98491.6	3.98001	0.00667684
14.8543	0.136778	245.728	348.188	0.164691	27.75	57.375	98200.3	3.98001	0.00608525
14.2344	0.09675	245.728	346.188	0.285088	43.5	58.1562	98136.9	3.75362	0.00625975
18.8537	0.135167	245.728	387	0.267713	21.375	67.2812	97674.4	3.75362	0.00884616
15.7299	0.125944	245.728	399.312	0.20596	45.5	61.6562	97630.6	3.75362	0.0101208
16.364	0.121548	245.728	371.656	0.325309	203.5	62.5312	97628.8	3.75362	0.00824975
22.5435	0.104667	245.728	391.781	0.338294	139.5	68.7188	97467.8	3.66753	0.00760441
17.1027	0.1515	245.728	369.5	0.271521	218	58.3125	98069.4	3.66753	0.00791456
18.725	0.145406	245.728	376.625	0.407824	335.125	69.9375	97473.4	3.66753	0.00646097
18.1875	0.120119	245.728	373.75	0.390788	308.25	61.875	97737.5	3.66753	0.00778931
19.1528	0.137639	245.728	360.75	0.315382	183.5	53.4375	97834.7	3.46351	0.00741194
12.9735	0.1191	245.728	340.188	0.312384	218.5	56.6875	98515	3.46351	0.00672094
15	0.182036	245.728	357.531	0.319337	336.125	54.0312	98237.8	3.46351	0.00673819
19.6755	0.126429	245.728	340.75	0.368251	404.875	51.7188	97995.3	3.49501	0.00602694
19.2083	0.204167	245.728	337.844	0.349802	458.75	45.2188	98756.6	3.49501	0.0063815
19.9808	0.111429	245.728	307.219	0.338128	485.875	44.7188	98610.3	3.49501	0.00500484
22.1845	0.214667	245.728	283.5	0.175822	469.875	36.5625	99286.6	3.49501	0.00455059
19.7202	0.18375	245.728	273.938	0.125993	450.875	33.2188	99760.6	2.96791	0.00367088
39.212	0.199833	245.728	271.375	0.285595	419	37.625	98969.7	2.96791	0.00390206
32.2946	0.252167	245.728	283.656	0.150863	403.875	27.5	99351.6	2.96791	0.00449194
52.0238	0.280375	245.728	283.344	0.07223	282.125	20.9688	99443.8	2.96791	0.00466044
32.3889	0.0661665	245.728	266	0.0959547	176.25	22.0625	99670.3	2.46925	0.00453147
45.7202	0.175	245.728	239.281	0.0172685	142.625	21.6875	99920.6	2.46925	0.00280191
61.125	0.1995	245.728	211.969	0.0768959	89.875	22.0625	100034	2.46925	0.00191
59.3274		245.728	219.531	0.00291412	20.75	18.2188	100334	2.46925	0.00200444
50.5729		245.728	217.219	0.00716453	0	16.9062	100131	2.46287	0.00167081
103.731		245.728	203.188	0.00971223	0	23.0938	100907	2.46287	0.00108497
50.724		245.728	230.875	0.00921508	0	26.4062	100100	2.46287	0.00178112
59.75		245.728	194.5	0.0133454	0	33.5625	100593	2.46287	0.00115544
146.917		245.728	199.219	0.000889089	0	55.75	100296	2.51483	0.00105087
114.506		245.728	189.094	-0.00373172	0	65.7188	100144	2.51483	0.000963594
83.9524		245.728	148.812	0.00401945	0	87.4688	101323	2.51483	0.00043225
119.508		245.728	189.625	-0.00268059	0	89.5938	100673	2.51483	0.000824437
108.667		245.728	202.969	-0.000996522	0	107.625	99960.3	2.74774	0.00115244
50.7667		245.728	208.531	-0.00317758	0	118.406	100254	2.74774	0.001487
43.3349		432.096	236.25	0.0287411	0	149.875	97658.4	3.52703	0.00171569
25.5865		432.096	244.312	0.0345248	0	146.125	97499.1	3.52703	0.00260219
22.1669		432.096	240.75	0.0185278	0.25	157.031	97512.2	3.52703	0.00267403
20.1964	0.104333	432.096	279.438	0.0314149	0	41.7812	97212.2	3.52703	0.00445006
13.5065		432.096	296.844	0.0909112	13.75	50.25	96987.8	5.33659	0.00456931
21.6964	0.154125	432.096	296.156	0.0552304	44.5	49.0312	96653.4	5.33659	0.00547587
19.36	0.116667	432.096	314.75	0.079671	57.5	65.6875	96633.4	5.33659	0.00497991
15.7083	0.20275	432.096	295.094	0.121024	114.125	61.9062	96955.3	5.33659	0.004861
16.9167	0.125278	432.096	306.219	0.113721	304.125	69.9375	96500.3	5.13134	0.00503419
18.5729	0.146667	432.096	325.969	0.207014	262.375	71.2188	96180.9	5.13134	0.00518328
21.3041	0.1685	432.096	325.25	0.246149	306.5	77.0312	96364.1	5.13134	0.00484862
19.1827	0.12225	432.096	342.844	0.201936	301	75.6562	96035.3	5.13134	0.00543409
21.5	0.192	432.096	339.125	0.20223	341.625	67.1875	95996.2	4.82408	0.00662244
23.929	0.22525	432.096	359.25	0.264779	361.625	76.0625	95600.9	4.82408	0.00907216
23.7304	0.226375	432.096	380.406	0.168467	291	65.0625	95541.9	4.82408	0.0114012
17.1053	0.161867	432.096	372.844	0.248739	439.375	73.4375	95585.3	4.82408	0.00873662
23.5732	0.1725	432.096	381.625	0.367406	488.75	76.875	95433.1	4.65449	0.00733997
17.31		432.096	386.594	0.283878	541.25	71.2188	95984.1	4.65449	0.00710916
21.1736	0.1171	432.096	381.625	0.358744	595.75	79.9062	95450.3	4.65449	0.00726481
19.6146	0.112556	432.096	358.656	0.378317	549.875	69.1875	95672.5	4.65449	0.00787494
21.756	0.117	432.096	370.562	0.328295	492.125	65.9062	95763.4	4.4225	0.00610063
20.3066	0.1439	432.096	351.125	0.304362	474.875	66.1562	96405	4.4225	0.00544413
20.9107	0.18	432.096	342.25	0.237839	524.75	59.4375	96149.4	4.4225	0.00628475
28.2348	0.1995	432.096	336.562	0.357256	483.125	58.6875	95934.7	4.69691	0.00578612
25.8125	0.15125	432.096	331.219	0.221133	476	43.2812	96698.4	4.69691	0.00672703
23.9792	0.115733	432.096	316.062	0.385723	492.625	54.6562	96533.4	4.69691	0.00531516
37.2381	0.165375	432.096	288.25	0.321007	465.75	42.7812	97154.4	4.69691	0.00397675
17.7857	0.0890207	432.096	290.219	0.076039	474.875	36.3438	97585.3	4.40097	0.00326866
26.3266	0.160286	432.096	273.562	0.304339	474	42.5938	96858.8	4.40097	0.00345878
21.9613	0.1791	432.096	271.625	0.165794	459.25	32.25	97183.1	4.40097	0.004105
34.0179	0.190666	432.096	263.031	0.171119	399.5	26.375	97319.4	4.40097	0.00426641
22.7986	0.038	432.096	261.031	0.113764	379	28.3125	97460.9	3.82597	0.00374766
31.2202	0.20925	432.096	233.125	0.0903432	360.875	22.875	97718.1	3.82597	0.00229878
30.7976	0.154056	432.096	217.281	0.119782	333.25	26.3125	97826.2	3.82597	0.00159728
28.8333	0.176375	432.096	228.25	0.140485	290.75	21.9062	98106.6	3.82597	0.00189938
45.6845	0.298167	432.096	217.562	0.0857733	260.375	19.2188	97891.2	3.47739	0.00155038
53.3179	0.17	432.096	214.125	0.156033	155.375	20.3438	98627.5	3.47739	0.00107372
44.6845		432.096	215.469	0.0689014	34	22.1562	97860	3.47739	0.00162028
22.6771		432.096	186.656	0.0389362	1.75	53.125	98272.5	3.47739	0.00109466
112.986		432.096	187.125	0.0201939	0	60.5625	98011.9	2.93972	0.000928656
33.7857		432.096	212.625	0.0180504	0	70.125	97865.6	2.93972	0.000779906
37.8988		432.096	205.375	0.026381	0	87.5	98929.1	2.93972	0.000357219
70.3333		432.096	196.688	0.034676	0	90.3438	98360.6	2.93972	0.0007275
57.097		432.096	213.969	0.0249539	0	100.781	97705.3	3.58224	0.00105575
25.7857		432.096	237.312	0.0260703	0	115.219	97982.5	3.58224	0.00133184
47.3817	0.152222	905.056	236.25	0.0482354	191.125	30.1875	91030.3	3.6806	0.00202122
41.8175	0.127389	905.056	244.312	0.0587376	186.875	33.25	90786.9	3.6806	0.00186372
108.798	0.362	905.056	240.75	0.0486598	190.5	35.75	90737.8	3.6806	0.00160041
97.6302	0.229	905.056	279.438	0.0511934	157.75	34.25	90934.7	3.6806	0.00286153
33.757	0.27225	905.056	296.844	0.0473751	120.125	31.1562	90425.3	4.72739	0.003175
33.4861	0.124708	905.056	296.156	0.110999	127.875	33.0938	90737.5	4.72739	0.00346216
37.1729	0.06225	905.056	314.75	0.14394	165.75	36.25	90711.6	4.72739	0.00472828
30.7349	0.205945	905.056	295.094	0.245149	175.625	44.375	90744.7	4.72739	0.00436544
46.1875	0.120361	905.056	306.219	0.209323	279.875	48.0938	90686.6	5.04654	0.00367991
36.1413	0.132786	905.056	325.969	0.220748	237.125	49.1562	90233.8	5.04654	0.00403778
40.0885	0.257584	905.056	325.25	0.20817	267.5	51.4062	90377.5	5.04654	0.00381072
45.1293	0.109778	905.056	342.844	0.182248	201.875	44.4688	90165.6	5.04654	0.00582491
32.2619	0.161055	905.056	339.125	0.244034	275.125	44.6875	90129.1	4.88161	0.0064815
29.3708	0.235542	905.056	359.25	0.240561	297.5	52.8125	89878.1	4.88161	0.00580666
36.4917	0.195125	905.056	380.406	0.175165	321.25	40.1875	89830.9	4.88161	0.00928778
27.1789	0.174833	905.056	372.844	0.252038	391.5	47.0625	89817.5	4.88161	0.00792112
45.6752	0.238762	905.056	381.625	0.186186	354.75	49.0312	89620.6	4.27844	0.00725503
20.9963	0.204583	905.056	386.594	0.153368	345.625	41.125	90018.1	4.27844	0.00908684
33.6833	0.1975	905.056	381.625	0.235987	316.75	42.4375	89898.4	4.27844	0.00868738
23.9583	0.15025	905.056	358.656	0.202248	374.5	48.0938	89968.8	4.27844	0.00609847
24.5357	0.157833	905.056	370.562	0.129211	340	39.8125	89790	4.21604	0.00683634
23.3148	0.132833	905.056	351.125	0.208791	310.5	38.6875	90377.5	4.21604	0.00662075
29.5298	0.193167	905.056	342.25	0.228894	380.625	39.25	90403.4	4.21604	0.00539991
31.6046	0.175929	905.056	336.562	0.280287	423	40.5312	90229.1	4.39477	0.00506003
25.2321	0.239	905.056	331.219	0.220593	463.25	37.6562	90542.2	4.39477	0.00510556
31.3714	0.169881	905.056	316.062	0.211757	468.375	36.5938	90439.1	4.39477	0.00376644
48.3452	0.305	905.056	288.25	0.108105	470.25	34.25	90801.6	4.39477	0.00302466
74.5208	0.485167	905.056	290.219	0.158841	470	27.4375	91089.7	3.74661	0.00341716
54.6108	0.20019	905.056	273.562	0.182163	479.75	29.5312	90974.7	3.74661	0.00341956
43.8835	0.2235	905.056	271.625	0.172622	485.125	26.7812	91059.7	3.74661	0.00291469
64.1528	0.234929	905.056	263.031	0.150279	486.875	24.0938	91411.6	3.74661	0.00270147
57.0952	0.130548	905.056	261.031	0.179024	486.5	22.0625	91219.4	2.75842	0.00313369
46.75	0.142119	905.056	233.125	0.134994	479.5	20.0625	91334.7	2.75842	0.00223187
57.9948	0.139214	905.056	217.281	0.0839824	471.125	18.6875	91714.4	2.75842	0.001647
61.2024	0.2	905.056	228.25	0.0976961	460.875	14.9062	91610.9	2.75842	0.00176356
62.3229	0.0955832	905.056	217.562	0.0569654	450.75	14.625	91386.2	2.65156	0.00112503
47.8012	0.217625	905.056	214.125	0.0266581	425.25	14.5312	92333.4	2.65156	0.00162894
80.4948	0.217933	905.056	215.469	0.0769765	391	13.6875	91684.1	2.65156	0.00152594
45.4333	0.166278	905.056	186.656	0.0652656	375	16.625	91397.2	2.65156	0.00103928
64.5714	0.2	905.056	187.125	0.0549566	359.5	17.0312	91759.4	3.03184	0.00101884
62.006	0.1501	905.056	212.625	0.047587	346.875	16.5938	91177.8	3.03184	0.0015325
35.9722	0.191	905.056	205.375	0.0196693	330.25	20.3125	91605.3	3.03184	0.00118372
61.7024		905.056	196.688	0.0396327	313.75	32.4375	91890	3.03184	0.00114497
58.3113	0.235	905.056	213.969	0.0461636	296.75	27.6875	91338.4	2.5814	0.00157103
33.5952	0.14725	905.056	237.312	0.0418654	288.667	21.9062	91406.6	2.5814	0.00201762
41.8916	0.1665	905.056	236.25	0.0662659	199.625	30.1875	91030.3	3.73575	0.00202122
34.7503	0.175433	905.056	244.312	0.0587472	197.375	33.25	90786.9	3.73575	0.00186372
100.541	0.435945	905.056	240.75	0.0509228	201.25	35.75	90737.8	3.73575	0.00160041
94.7708	0.254167	905.056	279.438	0.0319481	170.375	34.25	90934.7	3.73575	0.00286153
36.7772	0.296667	905.056	296.844	0.0687387	134	31.1562	90425.3	4.83024	0.003175
30.4464	0.187625	905.056	296.156	0.0760211	148	33.0938	90737.5	4.83024	0.00346216
33.7893	0.12275	905.056	314.75	0.0942279	177.875	36.25	90711.6	4.83024	0.00472828
36.3265	0.254639	905.056	295.094	0.151413	187.5	44.375	90744.7	4.83024	0.00436544
46.1548	0.185889	905.056	306.219	0.128357	304.125	48.0938	90686.6	5.12212	0.00367991
43.3973	0.163786	905.056	325.969	0.192351	268.375	49.1562	90233.8	5.12212	0.00403778
58.9456	0.280305	905.056	325.25	0.153181	309.625	51.4062	90377.5	5.12212	0.00381072
56.9744	0.123667	905.056	342.844	0.118843	244.125	44.4688	90165.6	5.12212	0.00582491
28.3802	0.181278	905.056	339.125	0.179189	307.375	44.6875	90129.1	4.97295	0.0064815
36.0958	0.253095	905.056	359.25	0.231514	328.875	52.8125	89878.1	4.97295	0.00580666
49.525	0.2265	905.056	380.406	0.141992	357.125	40.1875	89830.9	4.97295	0.00928778
41.2742	0.202833	905.056	372.844	0.175257	433.625	47.0625	89817.5	4.97295	0.00792112
52.2064	0.278905	905.056	381.625	0.187288	411.875	49.0312	89620.6	4.32113	0.00725503
30.5763	0.209111	905.056	386.594	0.138738	409.875	41.125	90018.1	4.32113	0.00908684
39.3333	0.204667	905.056	381.625	0.125675	379.125	42.4375	89898.4	4.32113	0.00868738
39.506	0.157389	905.056	358.656	0.175158	433.25	48.0938	89968.8	4.32113	0.00609847
33.7917	0.214	905.056	370.562	0.141641	397.25	39.8125	89790	4.25805	0.00683634
32.5237	0.186583	905.056	351.125	0.0842389	371.125	38.6875	90377.5	4.25805	0.00662075
37.119	0.241	905.056	342.25	0.184767	437.25	39.25	90403.4	4.25805	0.00539991
41.2489	0.203952	905.056	336.562	0.20939	481.5	40.5312	90229.1	4.42673	0.00506003
35.7569	0.234611	905.056	331.219	0.194422	518.875	37.6562	90542.2	4.42673	0.00510556
60.8	0.205762	905.056	316.062	0.174895	526.75	36.5938	90439.1	4.42673	0.00376644
51.6806	0.305762	905.056	288.25	0.121731	531	34.25	90801.6	4.42673	0.00302466
69.0833	0.573417	905.056	290.219	0.101706	531.625	27.4375	91089.7	3.81032	0.00341716
58.0224	0.214188	905.056	273.562	0.151265	541.75	29.5312	90974.7	3.81032	0.00341956
42.4583	0.211643	905.056	271.625	0.139335	548.25	26.7812	91059.7	3.81032	0.00291469
64.4702	0.242208	905.056	263.031	0.120934	551.75	24.0938	91411.6	3.81032	0.00270147
49.9514	0.137429	905.056	261.031	0.128789	552.625	22.0625	91219.4	2.80033	0.00313369
43.2656	0.116639	905.056	233.125	0.104575	550	20.0625	91334.7	2.80033	0.00223187
53.9948	0.146083	905.056	217.281	0.100655	543.75	18.6875	91714.4	2.80033	0.001647
66.3698	0.166071	905.056	228.25	0.0569282	535.375	14.9062	91610.9	2.80033	0.00176356
62.3958	0.1389	905.056	217.562	0.0622671	526.125	14.625	91386.2	2.68547	0.00112503
44.6393	0.217375	905.056	214.125	0.0621312	503.125	14.5312	92333.4	2.68547	0.00162894
71.4583	0.225867	905.056	215.469	0.0344068	477	13.6875	91684.1	2.68547	0.00152594
47.1875	0.175048	905.056	186.656	0.0818451	465.75	16.625	91397.2	2.68547	0.00103928
55.5357	0.199571	905.056	187.125	0.0754402	456	17.0312	91759.4	3.10963	0.00101884
60.7798	0.137528	905.056	212.625	0.0625823	445.375	16.5938	91177.8	3.10963	0.0015325
34.2798	0.155084	905.056	205.375	0.02899	430	20.3125	91605.3	3.10963	0.00118372
58.5885		905.056	196.688	0.0234077	416.25	32.4375	91890	3.10963	0.00114497
54.3542	0.191	905.056	213.969	0.0525311	404.375	27.6875	91338.4	2.60114	0.00157103
40.1667	0.203	905.056	237.312	0.0601835	397.833	21.9062	91406.6	2.60114	0.00201762
38.9867	0.154667	905.056	257.875	0.0804669	197.625	30.1875	91030.3	3.73575	0.00202122
31.8232	0.167833	905.056	260.031	0.0475542	195.375	33.25	90786.9	3.73575	0.00186372
102.803	0.360694	905.056	259.719	0.0575814	199.25	35.75	90737.8	3.73575	0.00160041
92.0238	0.18975	905.056	302.406	0.0431548	164.625	34.25	90934.7	3.73575	0.00286153
30.728	0.277667	905.056	313.469	0.0472834	123.625	31.1562	90425.3	4.83024	0.003175
27.5513	0.1491	905.056	324.906	0.104764	138	33.0938	90737.5	4.83024	0.00346216
24.4307	0.091375	905.056	328	0.100265	161.75	36.25	90711.6	4.83024	0.00472828
33.7842	0.223767	905.056	329.312	0.162196	170.5	44.375	90744.7	4.83024	0.00436544
33.8177	0.154778	905.056	332.875	0.143369	291.375	48.0938	90686.6	5.12212	0.00367991
28.6827	0.120444	905.056	360.5	0.169079	262.75	49.1562	90233.8	5.12212	0.00403778
31.6381	0.262	905.056	361.781	0.186774	305.125	51.4062	90377.5	5.12212	0.00381072
38.4228	0.174542	905.056	378.062	0.126145	242.25	44.4688	90165.6	5.12212	0.00582491
22.3194	0.157583	905.056	378.469	0.233413	306.625	44.6875	90129.1	4.97295	0.0064815
26.4655	0.228667	905.056	399.344	0.21482	326.5	52.8125	89878.1	4.97295	0.00580666
32.5179	0.215708	905.056	413.438	0.188447	354.25	40.1875	89830.9	4.97295	0.00928778
29.9206	0.176	905.056	411.5	0.238698	431.75	47.0625	89817.5	4.97295	0.00792112
44.7137	0.253417	905.056	422.406	0.209311	411.625	49.0312	89620.6	4.32113	0.00725503
15.757	0.229333	905.056	417.781	0.124889	407.625	41.125	90018.1	4.32113	0.00908684
28.425	0.22	905.056	415.406	0.227164	377.375	42.4375	89898.4	4.32113	0.00868738
24.2031	0.194944	905.056	392.75	0.206647	434.625	48.0938	89968.8	4.32113	0.00609847
21.2321	0.1606	905.056	401.875	0.122674	399.125	39.8125	89790	4.25805	0.00683634
18.7622	0.180333	905.056	380.125	0.125156	371.375	38.6875	90377.5	4.25805	0.00662075
28.744	0.253875	905.056	378.75	0.211321	436.625	39.25	90403.4	4.25805	0.00539991
39.2185	0.200729	905.056	365.312	0.24599	482.5	40.5312	90229.1	4.42673	0.00506003
28.8929	0.227167	905.056	359.188	0.217907	519.125	37.6562	90542.2	4.42673	0.00510556
37.0752	0.174222	905.056	337.344	0.218021	530.875	36.5938	90439.1	4.42673	0.00376644
42.4653	0.324762	905.056	307.656	0.138407	535.625	34.25	90801.6	4.42673	0.00302466
50.3021	0.591167	905.056	294.969	0.103309	536.625	27.4375	91089.7	3.81032	0.00341716
49.0845	0.2035	905.056	290.562	0.181341	546.75	29.5312	90974.7	3.81032	0.00341956
31.6097	0.231095	905.056	300.531	0.171818	553.25	26.7812	91059.7	3.81032	0.00291469
68.375	0.274881	905.056	287.094	0.142476	556.75	24.0938	91411.6	3.81032	0.00270147
35.7708	0.14969	905.056	283.781	0.171818	557.625	22.0625	91219.4	2.80033	0.00313369
31.849	0.161881	905.056	255.688	0.141703	555	20.0625	91334.7	2.80033	0.00223187
38.1964	0.152452	905.056	236.594	0.0999899	548.75	18.6875	91714.4	2.80033	0.001647
50.5774	0.166583	905.056	251.875	0.0910373	540.375	14.9062	91610.9	2.80033	0.00176356
49.0139	0.124292	905.056	242.094	0.109193	531.125	14.625	91386.2	2.68547	0.00112503
32.6667	0.1615	905.056	230.188	0.0473882	509.875	14.5312	92333.4	2.68547	0.00162894
59.9097	0.173667	905.056	240.406	0.0674658	485.875	13.6875	91684.1	2.68547	0.00152594
35.4702	0.1012	905.056	208.344	0.109064	474.75	16.625	91397.2	2.68547	0.00103928
38.7431	0.1631	905.056	210.812	0.0762706	465	17.0312	91759.4	3.10963	0.00101884
42.1548	0.1096	905.056	229.844	0.0792817	454.375	16.5938	91177.8	3.10963	0.0015325
23.5298	0.13175	905.056	206.969	0.027216	439	20.3125	91605.3	3.10963	0.00118372
47.0952		905.056	214.469	0.0462995	425.25	32.4375	91890	3.10963	0.00114497
39.1954	0.1685	905.056	233.625	0.0602933	413.375	27.6875	91338.4	2.60114	0.00157103
26.4702	0.198	905.056	239.656	0.0581389	406.833	21.9062	91406.6	2.60114	0.00201762
48.7158	0.161917	-292	352.438	0.101715	495.125	59.125	105886	3.38821	0.00178822
42.631	0.181111	-292	357.906	0.100019	514.375	62.8125	105645	3.38821	0.00189281
60.7277	0.185583	-292	358.25	0.0838669	522.875	66.6875	105572	3.38821	0.00181894
54.9167	0.136556	-292	391.531	0.0792757	530.875	65.5	105376	3.38821	0.00337344
69.1966	0.121	-292	408.594	0.0562479	494.875	66.5625	104852	4.61123	0.00343769
24.5972	0.145833	-292	412.969	0.0751268	483.25	67.9688	105020	4.61123	0.00432844
53.4028	0.109055	-292	430.906	0.0892093	504.375	78.2812	104868	4.61123	0.00392844
59.65	0.176458	-292	425.438	0.19432	487	74.0312	105055	4.61123	0.00403759
49.6131	0.141042	-292	448.906	0.234033	611.875	89.8125	104755	5.2291	0.00410812
45.3152	0.122472	-292	470.719	0.247745	625.125	88.8125	104141	5.2291	0.00507156
52.5387	0.190694	-292	474.625	0.199393	628.5	90.7812	104274	5.2291	0.00471691
59.4375	0.220833	-292	480.344	0.185353	609.875	79.7188	103916	5.2291	0.00595575
32.9948	0.129167	-292	480.062	0.158486	666.125	83.4062	103921	5.0479	0.00658266
40.9274	0.223972	-292	507.312	0.226777	673.625	87.5	103441	5.0479	0.00754006
44.6828	0.23	-292	503.312	0.174546	638.125	81.75	103388	5.0479	0.00976319
26.3905	0.170714	-292	512.688	0.176382	687.875	85.5625	103359	5.0479	0.00877575
27.0962	0.219429	-292	532.719	0.270354	667	88.375	102973	5.07105	0.00809853
22.4579	0.225867	-292	516.969	0.224519	690	86.6562	103527	5.07105	0.00846325
31.8403	0.205333	-292	512.531	0.237674	669.5	82.75	103309	5.07105	0.00831216
49.5677	0.214643	-292	488.844	0.203673	698.25	83.5625	103575	5.07105	0.00730628
28.276	0.1474	-292	499.219	0.157443	670.75	78.5625	103318	4.4271	0.00717412
22.0179	0.185195	-292	476.656	0.234276	643.25	73.75	104203	4.4271	0.00683475
27.3229	0.1762	-292	474.125	0.142459	692.625	72.7188	104116	4.4271	0.0063975
31.8904	0.133786	-292	460.75	0.235665	711.75	72.8438	103918	4.07445	0.00630594
29.6667	0.188305	-292	448.125	0.211192	728.25	67.4375	104472	4.07445	0.00629206
40.4173	0.147667	-292	433.688	0.215588	735.625	65.4688	104392	4.07445	0.00543416
75.1905	0.241929	-292	404.844	0.224878	732.125	61.3438	105154	4.07445	0.00418563
45.4226	0.325633	-292	378.25	0.153752	732.125	53.9688	105654	3.6905	0.00365347
39.464	0.186643	-292	376.312	0.225054	733.75	54.2188	105274	3.6905	0.00373084
40.9583	0.244417	-292	383.5	0.185739	733	48	105398	3.6905	0.00414456
58.7569	0.230583	-292	361.125	0.15563	731.5	44.0938	105913	3.6905	0.00384941
64.125	0.153167	-292	360.219	0.159014	730.625	39.125	105835	2.92932	0.00359394
58.9236	0.196083	-292	330.188	0.151244	726.25	37.4062	106198	2.92932	0.00260037
94.1071	0.211619	-292	314.938	0.144013	713.25	35.6562	106638	2.92932	0.00186587
121.583	0.273889	-292	324.906	0.102583	689.5	30.2188	106628	2.92932	0.00207844
133.625	0.242417	-292	314.75	0.0505485	681.5	26.75	106433	2.9467	0.001275
131.548	0.304528	-292	304.438	0.0621223	670.875	28.625	107623	2.9467	0.00154966
148.823	0.280917	-292	313.531	0.0739948	658.5	27.7812	106776	2.9467	0.00162984
71.8403	0.2195	-292	290.219	0.0938985	650.5	31.1562	106983	2.9467	0.00116984
87.9062	0.2124	-292	286.344	0.101928	642.5	31.875	107080	2.64133	0.00107266
81.1042	0.1625	-292	302.188	0.0659923	634.5	33.6875	106367	2.64133	0.00173066
67.5833	0.154	-292	289.219	0.0672683	626.5	39.25	107332	2.64133	0.00113084
75.7	0.122063	-292	294.688	0.0681	619.375	41.8125	107283	2.64133	0.00109722
56.4167	0.121333	-292	315.312	0.0929966	575.75	45.5625	106382	2.87533	0.00147316
43.3452	0.0415	-292	324.312	0.0732311	576.833	49.125	106530	2.87533	0.00170456
47.4143	0.108055	-183.456	255.438	0.112261	495.125	56.9688	104460	3.38821	0.00168675
49.3209	0.173278	-183.456	258.75	0.10616	514.375	59.9375	104224	3.38821	0.00171831
69.25	0.180083	-183.456	257.219	0.0855684	522.875	64.5	104149	3.38821	0.00164406
66.5347	0.140167	-183.456	300.75	0.0696582	530.875	62.0938	103988	3.38821	0.00322763
112.377	0.1215	-183.456	312.719	0.0667965	494.875	63.125	103479	4.61123	0.00345956
29.7603	0.0405	-183.456	323.156	0.0723432	483.25	65	103640	4.61123	0.00421103
62.1644	0.104583	-183.456	326.344	0.145948	504.375	75.2812	103502	4.61123	0.00389541
50.8808	0.197833	-183.456	328.906	0.234151	487	70.2188	103677	4.61123	0.00396791
56.7798	0.156125	-183.456	330.062	0.240667	611.875	86.875	103401	5.2291	0.00404116
60.2249	0.139	-183.456	358.406	0.307106	625.125	85	102817	5.2291	0.00508031
65.1828	0.204583	-183.456	360.562	0.227608	628.5	87.1562	102945	5.2291	0.00478253
61.2083	0.226	-183.456	375.594	0.23593	609.875	76.625	102600	5.2291	0.0058225
35.4115	0.142667	-183.456	375.562	0.250213	666.125	79.4688	102593	5.0479	0.00644647
42.1073	0.198267	-183.456	396.5	0.230023	673.625	84.7812	102137	5.0479	0.00749013
	0.22625	-183.456	412.062	0.191126	638.125	77.9688	102087	5.0479	0.00980869
35.9116	0.166611	-183.456	407.625	0.360131	687.875	82.8438	102053	5.0479	0.00859272
35.6042	0.2	-183.456	419.844	0.418583	667	84.7812	101693	5.07105	0.00798175
37.2728	0.202667	-183.456	415.406	0.251653	690	83.25	102228	5.07105	0.00830631
42.4375	0.208917	-183.456	412.906	0.227055	669.5	79.5625	102010	5.07105	0.00805287
27.5917	0.210222	-183.456	391.281	0.268406	698.25	80.4062	102258	5.07105	0.00715509
38.4167	0.1674	-183.456	399.656	0.186421	670.75	76.0938	102019	4.4271	0.00702656
28.5415	0.175833	-183.456	379.219	0.262813	643.25	70.0938	102874	4.4271	0.00676256
29.6845	0.13475	-183.456	377.688	0.323083	692.625	69.5625	102790	4.4271	0.00629938
35.6324	0.132619	-183.456	363.688	0.240496	711.75	70.125	102590	4.07445	0.00578531
28.6	0.196967	-183.456	358.094	0.283017	728.25	64.4688	103138	4.07445	0.00582631
35.2614	0.15075	-183.456	336.906	0.279752	735.625	63.1562	103049	4.07445	0.00447059
108.528	0.236524	-183.456	306.75	0.229023	732.125	59.2812	103783	4.07445	0.00337131
44.1667	0.294667	-183.456	294.375	0.199624	732.125	51.5312	104259	3.6905	0.00298134
41.8087	0.170714	-183.456	288.562	0.208987	733.75	52.4688	103896	3.6905	0.00276766
61.3333	0.230143	-183.456	299.156	0.181935	733	46.4062	104019	3.6905	0.00334781
63.2083	0.223771	-183.456	284.906	0.16382	731.5	42.5625	104514	3.6905	0.00323062
63.225	0.149562	-183.456	283.125	0.162334	730.625	37.5	104425	2.92932	0.00315797
65.4375	0.1865	-183.456	254.844	0.125516	726.25	35.9688	104764	2.92932	0.00236256
108.143	0.205571	-183.456	234.156	0.115124	713.25	34.4688	105190	2.92932	0.00152741
144.219	0.275861	-183.456	251.25	0.0647358	689.5	28.7188	105182	2.92932	0.00192991
154.5	0.235208	-183.456	241.188	0.0666239	681.5	25.6562	104986	2.9467	0.00120997
147.061	0.3085	-183.456	228.469	0.0852092	670.875	27.5312	106147	2.9467	0.00144088
159.992	0.290333	-183.456	238.219	0.0622951	658.5	26.5625	105317	2.9467	0.00152316
81.875	0.2349	-183.456	205.5	0.110828	650.5	30.0938	105488	2.9467	0.00111866
96.6458	0.23675	-183.456	209.625	0.0713664	642.5	30.5	105592	2.64133	0.00109113
104.549	0.1876	-183.456	228.812	0.0900774	634.5	31.9375	104896	2.64133	0.00168569
70.5714	0.170111	-183.456	205.5	0.0672181	626.5	37.5312	105832	2.64133	0.00108975
78.75	0.120375	-183.456	212.906	0.0894131	619.375	39.8125	105799	2.64133	0.00102112
65.8385	0.126583	-183.456	232.094	0.0973297	575.75	43.8438	104928	2.87533	0.00139328
43.1607	0.0413333	-183.456	238.438	0.0828406	576.833	46.8125	105070	2.87533	0.00159231
33.442	0.0854584	675.168	229.906	0.135063	505.25	53.5	94074.4	3.96665	0.00156959
46.2252	0.2275	675.168	244.25	0.114223	518.375	55.5312	93835	3.96665	0.00192725
41.3442	0.2025	675.168	236.438	0.068992	521.75	60.875	93786.2	3.96665	0.00141738
49.625	0.163143	675.168	276.75	0.100894	532.25	63.125	93955	3.96665	0.00267509
29.6279		675.168	295.25	0.0980131	537.5	62.375	93346.9	4.42772	0.00351434
20.2391	0.108166	675.168	295.531	0.114191	555.5	65.9375	93610.3	4.42772	0.00416094
18.6236	0.11725	675.168	295.906	0.186799	585.625	72.5312	93581.9	4.42772	0.00306594
23.9668	0.216834	675.168	314.062	0.207946	600.125	64.25	93614.1	4.42772	0.00396862
19.1302	0.113167	675.168	292.719	0.218635	659.5	84.6562	93593.8	4.95512	0.00262619
20.9833	0.111472	675.168	327.5	0.253886	706.875	81.625	93111.2	4.95512	0.00418669
18.9236	0.1396	675.168	327.031	0.265519	727.25	81.375	93242.2	4.95512	0.00345744
24.7385	0.15725	675.168	355.781	0.260544	722.375	78.3438	92856.9	4.95512	0.00602919
19.8403	0.1407	675.168	341.094	0.148358	723.625	79.3438	92873.4	4.45895	0.00489919
22.4201	0.140417	675.168	373.188	0.277285	709.625	80.5312	92666.6	4.45895	0.00663444
36.0759	0.1945	675.168	374.812	0.210601	696.25	76.5312	92580.3	4.45895	0.00664469
17.4736	0.100889	675.168	363	0.210486	714.75	84.1875	92533.4	4.45895	0.00692447
22.0621	0.18625	675.168	381.375	0.326807	711.375	84.4688	92277.5	4.62161	0.00611247
22.9627	0.179833	675.168	391.25	0.277848	707	73.0625	92672.2	4.62161	0.00749703
20.875	0.123333	675.168	386.062	0.235895	657	74.0938	92585.9	4.62161	0.00746853
21.6111	0.17625	675.168	364.344	0.230951	660.5	78.0312	92758.4	4.62161	0.00698609
18.8646	0.1155	675.168	370.438	0.262724	598.625	72.3125	92483.8	4.48192	0.00597491
14.8701	0.148167	675.168	354.781	0.234976	585.75	67.7812	93162.8	4.48192	0.00708941
18.5938	0.145375	675.168	348.375	0.329153	609.125	68.6562	93163.1	4.48192	0.00524947
21.3048	0.120361	675.168	331.938	0.314924	615.875	67.0938	92989.4	4.18063	0.00483606
18.1786	0.1575	675.168	332.531	0.278318	641	60.5312	93408.1	4.18063	0.00474878
20.4874	0.139095	675.168	310.531	0.276805	658.375	59.8438	93290	4.18063	0.00359959
23.1562	0.147806	675.168	284.406	0.232178	637.75	54.2188	93785.9	4.18063	0.00268766
22.5729	0.25025	675.168	286.344	0.188281	607	45.6875	94085.3	3.08579	0.00289297
38.5556	0.122688	675.168	262.438	0.272698	621	48.7812	93945.6	3.08579	0.00207547
34.7217	0.137583	675.168	276.969	0.206935	623.5	41.5938	93979.4	3.08579	0.00287375
50.6406	0.150222	675.168	259.156	0.20719	588.125	38.7812	94426.9	3.08579	0.0026145
37.9881	0.11175	675.168	257.781	0.148647	574.5	29.4375	94176.6	2.64795	0.00272894
44.8281	0.144857	675.168	228.281	0.151901	569.375	31.2188	94387.2	2.64795	0.00195309
52.0833	0.110357	675.168	208.031	0.17199	559.625	30.2188	94751.6	2.64795	0.00138503
50.4583	0.108595	675.168	214.656	0.150726	550.375	26.7188	94740.3	2.64795	0.00157166
59.0365	0.112278	675.168	216.375	0.112451	541	24.2188	94481.9	2.13835	0.00101681
60.4344	0.122944	675.168	196.094	0.123543	531.375	24.5938	95480	2.13835	0.00104816
65.8869	0.132667	675.168	210.531	0.101831	520.375	24.3438	94739.7	2.13835	0.00124853
38.9167	0.174222	675.168	187.188	0.109092	505	26.1562	94606.9	2.13835	0.00102762
61.625	0.127071	675.168	183.844	0.128839	490.625	27.4062	94895.6	2.28476	0.000724469
44.5357	0.108055	675.168	196.875	0.0994366	479.5	29.375	94305.3	2.28476	0.00103853
36.8393	0.1592	675.168	186.031	0.105076	466	37.375	94898.4	2.28476	0.000864031
32.2798	0.126833	675.168	184.188	0.131083	455.25	36.7188	95058.1	2.28476	0.000850281
27.671	0.0746	675.168	202.094	0.0828457	446.75	39.9062	94449.1	2.43085	0.000942
24.0208	0.0813571	675.168	210.844	0.084194	451.167	49.5625	94516.9	2.43085	0.00134906
22.4391	0.111562	675.168	229.906	0.0985469	468.25	53.5	94074.4	3.94565	0.00156959
37.0965	0.167292	675.168	244.25	0.0994154	481.375	55.5312	93835	3.94565	0.00192725
39.9301	0.216833	675.168	236.438	0.0510702	484.875	60.875	93786.2	3.94565	0.00141738
44.3229	0.152524	675.168	276.75	0.0795783	494.125	63.125	93955	3.94565	0.00267509
31.3166		675.168	295.25	0.0694326	497	62.375	93346.9	4.50129	0.00351434
21.5299	0.106875	675.168	295.531	0.0861384	514.5	65.9375	93610.3	4.50129	0.00416094
21.6071	0.0943333	675.168	295.906	0.118262	545	72.5312	93581.9	4.50129	0.00306594
37.014	0.19975	675.168	314.062	0.155024	563.125	64.25	93614.1	4.50129	0.00396862
27.0655	0.122071	675.168	292.719	0.150741	630.375	84.6562	93593.8	5.03762	0.00262619
25.4695	0.114976	675.168	327.5	0.154001	684.125	81.625	93111.2	5.03762	0.00418669
18.6557	0.1355	675.168	327.031	0.160747	709.75	81.375	93242.2	5.03762	0.00345744
27.264	0.163417	675.168	355.781	0.196234	706.375	78.3438	92856.9	5.03762	0.00602919
24.8333	0.140111	675.168	341.094	0.101786	707.25	79.3438	92873.4	4.51915	0.00489919
25.9633	0.132	675.168	373.188	0.205254	695	80.5312	92666.6	4.51915	0.00663444
40.7478	0.232333	675.168	374.812	0.147331	682.375	76.5312	92580.3	4.51915	0.00664469
19.9265	0.111306	675.168	363	0.193402	701.125	84.1875	92533.4	4.51915	0.00692447
23.2228	0.184357	675.168	381.375	0.232134	698.75	84.4688	92277.5	4.71233	0.00611247
24.635	0.1875	675.168	391.25	0.208396	694.375	73.0625	92672.2	4.71233	0.00749703
18.9583	0.146667	675.168	386.062	0.16924	645.5	74.0938	92585.9	4.71233	0.00746853
24.4896	0.195833	675.168	364.344	0.176193	648.625	78.0312	92758.4	4.71233	0.00698609
20.1042	0.135733	675.168	370.438	0.191073	586.625	72.3125	92483.8	4.46058	0.00597491
17.1142	0.174286	675.168	354.781	0.174984	572.25	67.7812	93162.8	4.46058	0.00708941
20.2812	0.175611	675.168	348.375	0.225358	592.75	68.6562	93163.1	4.46058	0.00524947
25.1528	0.134194	675.168	331.938	0.176267	602.25	67.0938	92989.4	4.29598	0.00483606
22.9444	0.170417	675.168	332.531	0.216746	628.875	60.5312	93408.1	4.29598	0.00474878
23.2557	0.140524	675.168	310.531	0.155235	644.125	59.8438	93290	4.29598	0.00359959
23.9226	0.157806	675.168	284.406	0.189082	624	54.2188	93785.9	4.29598	0.00268766
22.6607	0.245958	675.168	286.344	0.113654	593	45.6875	94085.3	3.16968	0.00289297
36.8062	0.124958	675.168	262.438	0.189347	607	48.7812	93945.6	3.16968	0.00207547
35.9955	0.161452	675.168	276.969	0.15524	609.5	41.5938	93979.4	3.16968	0.00287375
46.244	0.192262	675.168	259.156	0.138881	573.25	38.7812	94426.9	3.16968	0.0026145
36.5104	0.121111	675.168	257.781	0.0861949	558	29.4375	94176.6	2.71125	0.00272894
44.4479	0.147667	675.168	228.281	0.113478	552.375	31.2188	94387.2	2.71125	0.00195309
52.1354	0.143979	675.168	208.031	0.11013	542.625	30.2188	94751.6	2.71125	0.00138503
54.1012	0.103571	675.168	214.656	0.113268	533.25	26.7188	94740.3	2.71125	0.00157166
58.3452	0.128028	675.168	216.375	0.0759562	523	24.2188	94481.9	2.16415	0.00101681
62.0238	0.135278	675.168	196.094	0.0920813	513	24.5938	95480	2.16415	0.00104816
70.3681	0.153976	675.168	210.531	0.08835	501.375	24.3438	94739.7	2.16415	0.00124853
34.0833	0.180405	675.168	187.188	0.0881222	486	26.1562	94606.9	2.16415	0.00102762
54.0625	0.123357	675.168	183.844	0.0817782	471.625	27.4062	94895.6	2.25418	0.000724469
49.0476	0.108389	675.168	196.875	0.0958957	460.5	29.375	94305.3	2.25418	0.00103853
42.9427	0.161733	675.168	186.031	0.0807777	446.25	37.375	94898.4	2.25418	0.000864031
39.1905	0.127929	675.168	184.188	0.0807086	435.25	36.7188	95058.1	2.25418	0.000850281
29.5736	0.0888666	675.168	202.094	0.0804923	427.5	39.9062	94449.1	2.46342	0.000942
20.5893	0.0908571	675.168	210.844	0.0775292	430.167	49.5625	94516.9	2.46342	0.00134906
20.8758		1499.74	218.906	0.00901761	0	134.875	90050.3	3.48145	0.00199356
18.3214		1499.74	221.188	0.00847725	0	136.875	89896.2	3.48145	0.00195797
22.2896		1499.74	222.875	0.00592242	0.25	153.844	89901.6	3.48145	0.00215088
35.45	0.08825	1499.74	265.844	0.0419176	0.125	108.969	89867.8	3.48145	0.00421331
23.5157	0.11	1499.74	297.656	0.0819601	0.25	36.8438	89678.1	4.83777	0.00461453
15.625	0.088	1499.74	297	0.0830764	26.25	47.9688	89639.7	4.83777	0.00487494
	0.0749167	1499.74	293.656	0.096436	47.75	62.2812	89650.9	4.83777	0.00481456
13.913	0.212	1499.74	304.062	0.17998	27.375	49.6562	89896.2	4.83777	0.00490341
13.5	0.106208	1499.74	290.188	0.208637	89.125	76.5625	89565.3	5.22563	0.00494653
14.9692	0.156361	1499.74	315.5	0.386817	132.875	65.375	89306.2	5.22563	0.00586288
14.0194	0.225133	1499.74	316.938	0.30552	156.125	71.8438	89503.8	5.22563	0.00699181
8.58333	0.160111	1499.74	328.875	0.252831	87.25	62.625	89298.4	5.22563	0.00682962
7.52083	0.164889	1499.74	322.219	0.233709	149	65.4688	89198.8	4.40421	0.00677922
14.9082	0.182361	1499.74	343.688	0.449608	181.5	71.5	88929.7	4.40421	0.00866731
	0.193417	1499.74	374.531	0.337679	136.875	59.0312	88888.4	4.40421	0.0114974
11.0114	0.152267	1499.74	345.875	0.240405	286	73.4688	88879.4	4.40421	0.00917094
11.0257	0.164833	1499.74	360.781	0.447617	307.625	76.1562	88795.3	4.18201	0.00853756
10.2871	0.136	1499.74	345.906	0.331987	379.625	64.8125	89199.7	4.18201	0.00852925
9.81944	0.1699	1499.74	348.844	0.38394	474.125	74.7812	88809.4	4.18201	0.00720313
	0.164667	1499.74	340.875	0.305932	523.625	71.9688	88967.5	4.18201	0.00730381
10.125	0.127472	1499.74	337.781	0.425453	503	63.875	88957.5	4.12645	0.00710591
9.36364	0.124267	1499.74	328.562	0.309972	508	60.3438	89470.6	4.12645	0.00698256
10.2188	0.160067	1499.74	334.438	0.333517	552	62	89357.8	4.12645	0.007409
16.3333	0.120778	1499.74	315.188	0.341677	590.625	62.0625	89140.9	3.82768	0.00530309
	0.1737	1499.74	306.906	0.231957	616	52.2812	89619.7	3.82768	0.00523837
9.125	0.102405	1499.74	287.25	0.329487	615.5	56.2188	89504.4	3.82768	0.00399128
	0.1073	1499.74	266.5	0.27923	436.75	49	89833.4	3.82768	0.00337962
14.8333	0.165933	1499.74	253.969	0.203293	323.5	44.2812	90156.9	4.12127	0.00278569
13.0417	0.175708	1499.74	257.438	0.291087	297	47.1562	89663.1	4.12127	0.00273178
13.4673	0.214042	1499.74	264.188	0.14819	249.875	37.875	89971.6	4.12127	0.003444
20.6667	0.255639	1499.74	260.188	0.180971	135.125	36.5	89983.4	4.12127	0.00300425
	0.1791	1499.74	257.438	0.204044	87.5	31.75	90102.8	3.64342	0.00357172
13.3472	0.310333	1499.74	232.031	0.108514	47.25	31.3125	90159.1	3.64342	0.00235587
11.7917	0.267357	1499.74	206.969	0.187318	10.5	60.1875	90270.9	3.64342	0.00205728
17.3438		1499.74	220.438	0.082202	0	49	90450.3	3.64342	0.00211681
18.6667	0.2525	1499.74	211.75	0.0560647	0	51.0312	90190.3	3.43859	0.00179622
9.83333		1499.74	201.094	0.0770942	0	53.75	90853.4	3.43859	0.00155028
12.0417		1499.74	217.469	0.059721	0	51.4375	90216.9	3.43859	0.00182678
12.5		1499.74	170.281	0.0092113	0	65.25	90330.9	3.43859	0.000833375
15		1499.74	187.625	0.00797717	0	67.8125	90199.7	2.93422	0.00133975
11.3229		1499.74	201.125	0.00451148	0	68.6875	90035.3	2.93422	0.00137988
19.4375		1499.74	162.5	0.0202501	0	80.3125	90740.3	2.93422	0.000642875
14.9722		1499.74	195.25	0.00960371	0	84.0312	90467.2	2.93422	0.00116303
17.2649		1499.74	202.281	0.0158058	0	99.6562	89996.6	3.85896	0.00166613
16.9833		1499.74	209.469	-0.000168627	0	106.469	90244.7	3.85896	0.00166794
128.733		535.904	228.438	-0.00183411	0	149.906	95226.9	3.30753	0.00208741
83.5725		535.904	228.406	0.0043377	0	156.125	95084.4	3.30753	0.00205612
52.5282		535.904	232.562	0.00276113	0	176.75	95065.9	3.30753	0.00217838
90.675	0.182	535.904	277.031	0.0210469	0	102.562	94862.8	3.30753	0.00432416
28.8251	0.066	535.904	307.031	0.0693462	1.625	35.9375	94740.6	4.83151	0.00508794
39.8685	0.114	535.904	307.969	0.0303377	30.75	39.3438	94540.9	4.83151	0.00538794
26.9624	0.0993571	535.904	311.344	0.0804611	54.625	52.75	94495.3	4.83151	0.00519391
24.928	0.1287	535.904	324.844	0.107534	61.625	44.8438	94810.3	4.83151	0.00508653
29.975	0.0636388	535.904	316.906	0.16065	162.375	62.9062	94337.8	4.99487	0.00542769
26.75	0.0673666	535.904	334.531	0.283187	189.75	54.125	94050.6	4.99487	0.00711081
28.9438	0.198055	535.904	338.969	0.296139	120.875	57.1562	94292.8	4.99487	0.00833128
26.6492	0.117611	535.904	341.281	0.29862	56	57.875	94056.2	4.99487	0.00773675
30.2014	0.160555	535.904	339.969	0.169947	124.375	57.9688	93959.7	4.47004	0.00781919
30.4887	0.174583	535.904	369.594	0.284485	138.25	65.0938	93572.8	4.47004	0.0100056
26.05	0.17625	535.904	390.562	0.337313	61.375	53.0625	93581.2	4.47004	0.0128743
24.1111	0.140786	535.904	367.5	0.236937	196.625	67.8438	93542.5	4.47004	0.0107046
33.3679	0.138767	535.904	389.969	0.310271	208.625	59.0625	93413.4	4.3544	0.0105236
27.2128	0.1367	535.904	372.938	0.281468	275.5	50.4062	93943.8	4.3544	0.010407
33.3542	0.157533	535.904	374.844	0.229147	339.875	63.625	93420.3	4.3544	0.00882469
29.3393	0.131944	535.904	366.594	0.269818	362	60.2188	93616.2	4.3544	0.00817647
24.5833	0.1543	535.904	360.625	0.253658	323.75	53.2188	93668.4	4.12745	0.00796959
21.4305	0.192762	535.904	351.906	0.252346	324.5	50.4375	94266.6	4.12745	0.00834841
23.9333	0.194083	535.904	357.281	0.284036	375.875	49.625	94097.2	4.12745	0.00844856
26.2594	0.154806	535.904	337.812	0.278589	404.625	53.25	93820	3.9304	0.0058445
25.1875	0.22275	535.904	331.156	0.333838	420.125	44.2812	94434.7	3.9304	0.00599672
29.872	0.140524	535.904	313.281	0.240604	395.625	43.9375	94321.6	3.9304	0.00443853
33.7656	0.1876	535.904	288.156	0.291841	235.875	36.9688	94810	3.9304	0.00370672
29.6562	0.192267	535.904	278.844	0.138811	122.125	31.8125	95226.9	3.55088	0.00329406
66.8384	0.22731	535.904	271.656	0.156489	125.25	39.7188	94541.6	3.55088	0.00313116
58.8495	0.2617	535.904	282.562	0.221332	85.375	28.7188	94936.6	3.55088	0.00402269
73.8333	0.282143	535.904	274.375	0.124863	11.25	29.7188	94914.4	3.55088	0.003401
49.125	0.172667	535.904	268.125	0.112618	0	26.8438	95135.6	3.06599	0.00409584
72.631	0.381833	535.904	246.188	0.1511	0	23.0625	95293.4	3.06599	0.00268853
100.486	0.286361	535.904	221.844	0.0582706	0	24.1875	95380.6	3.06599	0.00186356
111.774	0.359	535.904	238.75	0.132512	0	18.4375	95659.7	3.06599	0.00222872
97.4271	0.184	535.904	223.375	0.0415939	0	18	95438.8	2.75624	0.00188131
133.925		535.904	209.875	0.0226618	0	39.25	96128.8	2.75624	0.00144437
102.406		535.904	226.469	0.00167514	0	45.3438	95388.8	2.75624	0.00186097
122.924		535.904	173.031	0.00988049	0	70.4062	95706.2	2.75624	0.000823938
274.327		535.904	192.938	0.00878714	0	73.7188	95470.6	2.36106	0.00113363
204.276		535.904	210.156	-0.00657417	0	73.4062	95295.6	2.36106	0.001329
144.156		535.904	176.188	-0.000777688	0	86.9688	96307.8	2.36106	0.000609188
250.734		535.904	206.75	-0.00639283	0	90.1875	95829.4	2.36106	0.00118038
170.604		535.904	211.438	0.00323917	0	109.875	95218.1	2.81422	0.00156834
122.578		535.904	224.719	0.0171256	0	115.75	95473.4	2.81422	0.00175584
119.397		535.904	228.438	0.00409994	0	149.906	95226.9	3.30753	0.00208741
78.4269		535.904	228.406	0.00562614	0	156.125	95084.4	3.30753	0.00205612
48.1155		535.904	232.562	0.00679749	0	176.75	95065.9	3.30753	0.00217838
61.7292	0.188	535.904	277.031	0.0172271	0	102.562	94862.8	3.30753	0.00432416
24.6936	0.052	535.904	307.031	0.051277	1.625	35.9375	94740.6	4.83151	0.00508794
29.7808	0.0745	535.904	307.969	0.0632763	30.75	39.3438	94540.9	4.83151	0.00538794
22.1343	0.0775	535.904	311.344	0.143704	54.625	52.75	94495.3	4.83151	0.00519391
16.0958	0.175083	535.904	324.844	0.25039	61.625	44.8438	94810.3	4.83151	0.00508653
18.526	0.102472	535.904	316.906	0.266809	162.375	62.9062	94337.8	4.99487	0.00542769
22.3388	0.0904445	535.904	334.531	0.3661	189.75	54.125	94050.6	4.99487	0.00711081
21.2512	0.199667	535.904	338.969	0.294967	120.875	57.1562	94292.8	4.99487	0.00833128
20.7782	0.1255	535.904	341.281	0.263366	56	57.875	94056.2	4.99487	0.00773675
22.5625	0.152917	535.904	339.969	0.222987	124.375	57.9688	93959.7	4.47004	0.00781919
22.1215	0.190778	535.904	369.594	0.34596	138.25	65.0938	93572.8	4.47004	0.0100056
22.4048	0.16825	535.904	390.562	0.2781	61.375	53.0625	93581.2	4.47004	0.0128743
22.475	0.120139	535.904	367.5	0.291041	196.625	67.8438	93542.5	4.47004	0.0107046
26.4496	0.1437	535.904	389.969	0.328871	208.625	59.0625	93413.4	4.3544	0.0105236
21.9543	0.1196	535.904	372.938	0.293732	275.5	50.4062	93943.8	4.3544	0.010407
24.0556	0.1544	535.904	374.844	0.306421	339.875	63.625	93420.3	4.3544	0.00882469
19.2202	0.127361	535.904	366.594	0.233189	362	60.2188	93616.2	4.3544	0.00817647
21.6786	0.134	535.904	360.625	0.346131	323.75	53.2188	93668.4	4.12745	0.00796959
16.0874	0.180667	535.904	351.906	0.299451	324.5	50.4375	94266.6	4.12745	0.00834841
18	0.178528	535.904	357.281	0.378402	375.875	49.625	94097.2	4.12745	0.00844856
23.1617	0.149667	535.904	337.812	0.374711	404.625	53.25	93820	3.9304	0.0058445
20.8988	0.227333	535.904	331.156	0.32043	420.125	44.2812	94434.7	3.9304	0.00599672
28.8087	0.124929	535.904	313.281	0.349558	395.625	43.9375	94321.6	3.9304	0.00443853
30.2986	0.1688	535.904	288.156	0.20111	235.875	36.9688	94810	3.9304	0.00370672
19.5714	0.1916	535.904	278.844	0.16281	122.125	31.8125	95226.9	3.55088	0.00329406
49.7527	0.212619	535.904	271.656	0.258905	125.25	39.7188	94541.6	3.55088	0.00313116
37.4236	0.2365	535.904	282.562	0.183941	85.375	28.7188	94936.6	3.55088	0.00402269
61.4167	0.272738	535.904	274.375	0.138236	11.25	29.7188	94914.4	3.55088	0.003401
33.6615	0.1735	535.904	268.125	0.202836	0	26.8438	95135.6	3.06599	0.00409584
54.8281	0.347833	535.904	246.188	0.0668525	0	23.0625	95293.4	3.06599	0.00268853
53.3036	0.290917	535.904	221.844	0.15074	0	24.1875	95380.6	3.06599	0.00186356
91.6528	0.356	535.904	238.75	0.106307	0	18.4375	95659.7	3.06599	0.00222872
74.3854	0.2285	535.904	223.375	0.0397505	0	18	95438.8	2.75624	0.00188131
90.4698		535.904	209.875	0.0124214	0	39.25	96128.8	2.75624	0.00144437
77.494		535.904	226.469	0.0250255	0	45.3438	95388.8	2.75624	0.00186097
94.9115		535.904	173.031	0.0119917	0	70.4062	95706.2	2.75624	0.000823938
227.908		535.904	192.938	0.00503283	0	73.7188	95470.6	2.36106	0.00113363
167.073		535.904	210.156	0.00545711	0	73.4062	95295.6	2.36106	0.001329
111.479		535.904	176.188	0.0032001	0	86.9688	96307.8	2.36106	0.000609188
192.771		535.904	206.75	0.0172952	0	90.1875	95829.4	2.36106	0.00118038
119.448		535.904	211.438	0.0163617	0	109.875	95218.1	2.81422	0.00156834
96.2344		535.904	224.719	0.00714594	0	115.75	95473.4	2.81422	0.00175584
		401.888	222.875	0.0127781	0	152.969	95600.3	2.32098	0.00220284
33.2083		401.888	225.719	0.011948	0	164.25	95460.6	2.32098	0.00226534
42.6667		401.888	245.031	0.0123282	0	154.156	95439.1	2.32098	0.00290638
32.4583	0.234	401.888	286.406	0.0291899	0	61.3438	95236.6	2.32098	0.00496506
14.5139	0.18	401.888	277.5	0.091191	5.125	102.781	95189.7	2.69515	0.00399581
19	0.0818	401.888	301.812	0.0300691	20.875	48.9375	94969.4	2.69515	0.00450719
19.2708	0.139555	401.888	300.344	0.117873	57.25	57.4062	94961.9	2.69515	0.00448112
15.8068	0.176467	401.888	293.812	0.168164	83.625	61.7812	95295	2.69515	0.00411284
15.8333	0.190861	401.888	316.469	0.167606	113.5	62.7812	94799.7	2.99327	0.00517513
11.6667	0.223881	401.888	339.344	0.224551	17.375	55.9688	94492.5	2.99327	0.00594172
14.7319	0.198889	401.888	331.344	0.265441	6.625	63.25	94700	2.99327	0.00616416
16.2222	0.1649	401.888	344.688	0.266434	24.125	61.4375	94485.9	2.99327	0.00622944
14.6667	0.141584	401.888	338.594	0.211044	22	61.7812	94412.8	2.51635	0.00657303
17.069	0.179	401.888	378.406	0.315907	9	69.5938	94063.1	2.51635	0.00950738
14.8155	0.132167	401.888	377.844	0.248279	19.125	68.6562	93985	2.51635	0.00872584
12.8239	0.142417	401.888	367.625	0.352246	96	72	93949.1	2.51635	0.00775553
21.2675	0.168733	401.888	383.844	0.315374	83.125	68.3438	93865	2.7931	0.00759819
11.6796	0.171639	401.888	364.438	0.305016	91.875	67.8438	94364.7	2.7931	0.00721081
12.9	0.143729	401.888	364.5	0.363853	154.375	75	93853.8	2.7931	0.00606425
14.1667	0.1268	401.888	364.344	0.348035	147.875	67.0938	94068.8	2.7931	0.00688106
14.651	0.1668	401.888	358.312	0.293549	116.5	59.0312	94108.4	2.73698	0.00738256
11.1593	0.158333	401.888	337.469	0.299099	54.25	57.8125	94750.6	2.73698	0.00602812
11.6562	0.187238	401.888	340.969	0.329619	115.875	61.125	94527.2	2.73698	0.00570931
15.9804	0.150452	401.888	337.812	0.338351	110.125	57.6875	94275.6	2.84519	0.00576334
15.8403	0.208833	401.888	325.844	0.291565	135.375	47.5625	94859.1	2.84519	0.00626678
18.8942	0.120333	401.888	316.312	0.265132	133.125	46.6875	94759.1	2.84519	0.00458188
16.4323	0.165416	401.888	284.438	0.144543	47.625	41.9375	95243.4	2.84519	0.00433728
17.0573	0.209	401.888	269.625	0.0746711	33.375	39.6875	95630	2.38784	0.00369606
29.9878	0.258139	401.888	284.688	0.240105	27.125	38	94960	2.38784	0.00389566
18.5618	0.245267	401.888	279.125	0.172684	5.875	31.4375	95353.1	2.38784	0.00398512
34.6146	0.349	401.888	295.062	0.0763982	0	27.0625	95318.8	2.38784	0.00498028
22.6823	0.18675	401.888	274.062	0.0835982	0	24.7812	95556.9	1.97732	0.00380897
20.6488		401.888	243.156	0.0342778	0	24.7188	95689.1	1.97732	0.00272166
26.0486	0.21	401.888	228.438	0.0777782	0	23.2812	95769.7	1.97732	0.00212422
34.8229		401.888	234.031	0.0162017	0	17.4375	96036.6	1.97732	0.00201591
29.2188		401.888	219.875	0.00613451	0	23.1875	95814.7	1.79174	0.00187309
33.3615		401.888	211.219	0.014689	0	51.1875	96548.8	1.79174	0.00160391
27.6719		401.888	226.719	0.0021499	0	52	95778.8	1.79174	0.00204475
20.2083		401.888	183.438	0.0156906	0	68.3438	96079.1	1.79174	0.000949688
53.0833		401.888	203.656	0.011773	0	69.9688	95865.3	1.52633	0.00141687
40.25		401.888	214.688	0.0116862	0	76.25	95669.7	1.52633	0.00155622
35.4167		401.888	163.625	0.0179615	0	90.125	96631.2	1.52633	0.000564344
54.1528		401.888	194.281	0.00844814	0	95.5	96202.5	1.52633	0.00100794
38.9767		401.888	210.906	0.0107737	0	108.125	95569.1	1.98682	0.00158966
24.9323		401.888	217.469	0.0121621	0	127.594	95858.4	1.98682	0.00178275
45.1146		401.888	222.875	0.0125079	0	152.969	95600.3	2.00268	0.00220284
37.0571		401.888	225.719	0.0725148	0	164.25	95460.6	2.00268	0.00226534
41.1771		401.888	245.031	0.0301985	0	154.156	95439.1	2.00268	0.00290638
		401.888	286.406	0.110917	0.375	61.3438	95236.6	2.00268	0.00496506
18.7222	0.224	401.888	277.5	0.0597082	7.375	102.781	95189.7	2.39599	0.00399581
15.1458	0.0542915	401.888	301.812	0.0936095	22.375	48.9375	94969.4	2.39599	0.00450719
25.1528	0.102556	401.888	300.344	0.117417	69.25	57.4062	94961.9	2.39599	0.00448112
17.0556	0.131267	401.888	293.812	0.179341	103.125	61.7812	95295	2.39599	0.00411284
28.6458	0.116667	401.888	316.469	0.193326	130.625	62.7812	94799.7	2.74735	0.00517513
23.467	0.178167	401.888	339.344	0.271939	18.5	55.9688	94492.5	2.74735	0.00594172
19.7833	0.179139	401.888	331.344	0.307703	6.125	63.25	94700	2.74735	0.00616416
22.2917	0.0943333	401.888	344.688	0.233023	22.75	61.4375	94485.9	2.74735	0.00622944
16.7292	0.185667	401.888	338.594	0.312742	20.375	61.7812	94412.8	2.35815	0.00657303
22.4908	0.222333	401.888	378.406	0.284435	9.875	69.5938	94063.1	2.35815	0.00950738
18.2185	0.103	401.888	377.844	0.283225	19.25	68.6562	93985	2.35815	0.00872584
16.7518	0.126976	401.888	367.625	0.347098	96.625	72	93949.1	2.35815	0.00775553
25.4494	0.182111	401.888	383.844	0.296863	86.375	68.3438	93865	2.5526	0.00759819
16.3385	0.183195	401.888	364.438	0.289136	89.375	67.8438	94364.7	2.5526	0.00721081
17.9653	0.149	401.888	364.5	0.380888	150.625	75	93853.8	2.5526	0.00606425
18.8698	0.158267	401.888	364.344	0.356143	147.25	67.0938	94068.8	2.5526	0.00688106
21.474	0.189278	401.888	358.312	0.264066	121.625	59.0312	94108.4	2.48016	0.00738256
15.7694	0.173667	401.888	337.469	0.280705	60.25	57.8125	94750.6	2.48016	0.00602812
17.0521	0.202771	401.888	340.969	0.340984	124.25	61.125	94527.2	2.48016	0.00570931
21.869	0.153433	401.888	337.812	0.291609	121.75	57.6875	94275.6	2.59111	0.00576334
22.4306	0.186033	401.888	325.844	0.251256	148.125	47.5625	94859.1	2.59111	0.00626678
23.9318	0.158095	401.888	316.312	0.254841	141.375	46.6875	94759.1	2.59111	0.00458188
24.9115	0.23375	401.888	284.438	0.153737	44.25	41.9375	95243.4	2.59111	0.00433728
25.6823	0.25	401.888	269.625	0.106017	32.375	39.6875	95630	2.0702	0.00369606
47.0041	0.288153	401.888	284.688	0.198657	26.125	38	94960	2.0702	0.00389566
32.8631	0.241417	401.888	279.125	0.183528	4.375	31.4375	95353.1	2.0702	0.00398512
49.3274	0.332	401.888	295.062	0.0756406	0	27.0625	95318.8	2.0702	0.00498028
37.026	0.1595	401.888	274.062	0.0890935	0	24.7812	95556.9	1.70181	0.00380897
35.2381		401.888	243.156	0.0534197	0	24.7188	95689.1	1.70181	0.00272166
43.6198	0.25125	401.888	228.438	0.0444141	0	23.2812	95769.7	1.70181	0.00212422
48.5677	0.288	401.888	234.031	0.0183172	0	17.4375	96036.6	1.70181	0.00201591
43.5208		401.888	219.875	0.00473929	0	23.1875	95814.7	1.577	0.00187309
46.5583		401.888	211.219	0.0125266	0	51.1875	96548.8	1.577	0.00160391
46.256		401.888	226.719	0.00546413	0	52	95778.8	1.577	0.00204475
36.7917		401.888	183.438	0.0172389	0	68.3438	96079.1	1.577	0.000949688
88.3214		401.888	203.656	0.00431603	0	69.9688	95865.3	1.23863	0.00141687
67.4345		401.888	214.688	0.0136006	0	76.25	95669.7	1.23863	0.00155622
56.0938		401.888	163.625	0.0136669	0	90.125	96631.2	1.23863	0.000564344
87.5952		401.888	194.281	0.00536279	0	95.5	96202.5	1.23863	0.00100794
60.0274		401.888	210.906	0.00781501	0	108.125	95569.1	1.67813	0.00158966
37.6548		401.888	217.469	0.0189113	0	127.594	95858.4	1.67813	0.00178275
73.1988	0.2499	1099.36	255.406	0.0479569	0	28.2188	89447.8	3.20533	0.00195306
51.7647	0.11975	1099.36	255.969	0.0449833	0.125	31.9062	89214.7	3.20533	0.00193097
151.97	0.2395	1099.36	257.438	0.0641907	0.375	36.375	89090.6	3.20533	0.00229106
135.292	0.384533	1099.36	290.031	0.0422728	0.5	36.75	89344.4	3.20533	0.00306191
49.207	0.09575	1099.36	300.844	0.0708471	4.5	27.75	88900.3	3.90217	0.00381088
41.6021	0.126875	1099.36	289.5	0.103936	3.75	42.125	89154.7	3.90217	0.00357053
50.9643	0.0993333	1099.36	312.562	0.126593	20.75	39.375	89205.6	3.90217	0.00504625
88.9035	0.4592	1099.36	293.5	0.146278	9.625	43.5938	89172.8	3.90217	0.00381291
55.5885	0.283334	1099.36	322.75	0.161791	49.25	44.9062	89140.6	4.32119	0.00443934
62.75	0.197333	1099.36	318.188	0.177168	85.5	52.9062	88661.9	4.32119	0.00278834
103.729	0.855976	1099.36	321.344	0.163746	63.5	53.7812	88799.4	4.32119	0.00327859
41.0134	0.159792	1099.36	339.062	0.170115	3.25	40.125	88699.1	4.32119	0.00624363
32.0521	0.115333	1099.36	328.188	0.205168	24.125	52.5625	88596.2	4.2959	0.00519078
51.3004	0.346733	1099.36	353.281	0.146327	8.625	52.6875	88393.1	4.2959	0.00483062
23.2398	0.252833	1099.36	365.781	0.158183	1.75	41.1875	88408.4	4.2959	0.00758344
28.8544	0.223375	1099.36	355.781	0.190528	26.5	50.5	88394.4	4.2959	0.00686169
40.4802	0.253067	1099.36	371.5	0.187774	0.375	51.8438	88197.2	3.62249	0.00725472
19.1537	0.15525	1099.36	365.562	0.180503	2.75	48.3438	88606.2	3.62249	0.00875366
19.1736	0.150833	1099.36	370.625	0.204051	7.125	49.25	88469.1	3.62249	0.00826713
31.1607	0.18925	1099.36	359.25	0.183944	9.375	45.5938	88496.9	3.62249	0.00666719
26.9306	0.1425	1099.36	353.25	0.139225	2.25	43.2812	88330	3.58485	0.00588109
22.1792	0.21275	1099.36	348.688	0.180514	1.75	36.6562	88905.6	3.58485	0.00624653
32.2083	0.23419	1099.36	341	0.19762	6.125	43.6875	88958.4	3.58485	0.00706216
39.3362	0.154417	1099.36	323.438	0.181236	9	43.25	88769.4	3.54054	0.00450091
36.3	0.175556	1099.36	317.469	0.194341	18.125	40.2188	89014.1	3.54054	0.00415591
37.7083	0.144595	1099.36	320.094	0.126347	32.5	36.5312	88931.9	3.54054	0.00470963
73.2857	0.558548	1099.36	295.25	0.0824793	2.875	34.4375	89200.9	3.54054	0.00291609
82.244	1.01	1099.36	298.5	0.138352	0.375	25.75	89470.3	3.2445	0.00395163
57.9214	0.267476	1099.36	285.5	0.127386	3.125	30.1875	89389.1	3.2445	0.00375209
51.3621	0.213357	1099.36	266.375	0.134745	4.75	28.2188	89483.1	3.2445	0.00252416
84.2679	0.237786	1099.36	274.781	0.125604	7.25	24.125	89784.7	3.2445	0.00352147
63.7292	0.14925	1099.36	258.938	0.14646	2.75	21.6562	89614.7	2.64926	0.00237841
65.4821	0.155548	1099.36	241.531	0.0973418	0	20.3125	89685.3	2.64926	0.00259766
90.6071	0.169333	1099.36	227.812	0.0550445	0	20.0938	90038.1	2.64926	0.0021065
113.679	0.173875	1099.36	233.531	0.0986237	0	15.625	90008.4	2.64926	0.00160728
102.494	0.196583	1099.36	220.438	0.0655248	0	16.5938	89756.2	2.5021	0.00133487
75.075	0.26875	1099.36	225.594	0.0686328	0	14.5938	90634.7	2.5021	0.00183972
106.476	0.203458	1099.36	218.469	0.068515	0	16.0625	90012.5	2.5021	0.00186256
82.2	0.278333	1099.36	197	0.0619817	0	18	89708.4	2.5021	0.00143619
98.5417	0.218792	1099.36	199.844	0.0724864	0	19.3125	90049.1	2.94587	0.00131484
81.625	0.134433	1099.36	219.125	0.0103249	0	18.1875	89508.8	2.94587	0.00174641
62.5893	0.23325	1099.36	209.531	0.0621768	0	21.75	89887.8	2.94587	0.00142312
61.5238		1099.36	210.844	0.0481234	0	25.5938	90197.2	2.94587	0.001698
69.8918	0.1935	1099.36	221.531	0.0609552	0	25.5	89655.9	3.03288	0.00197978
49.0119	0.123875	1099.36	240.969	0.0760789	0	26.6562	89732.8	3.03288	0.00233859
80.464	0.250833	1099.36	255.406	0.0515453	0	28.2188	89447.8	3.20533	0.00195306
57.1624	0.138833	1099.36	255.969	0.0810415	0.125	31.9062	89214.7	3.20533	0.00193097
118.172	0.2358	1099.36	257.438	0.0747589	0.375	36.375	89090.6	3.20533	0.00229106
155.024	0.392833	1099.36	290.031	0.070474	0.875	36.75	89344.4	3.20533	0.00306191
60.8373	0.123	1099.36	300.844	0.0601277	3.25	27.75	88900.3	3.90217	0.00381088
47.7982	0.0973333	1099.36	289.5	0.072587	2.625	42.125	89154.7	3.90217	0.00357053
76.4105	0.18275	1099.36	312.562	0.0976216	16.125	39.375	89205.6	3.90217	0.00504625
118.472	0.454767	1099.36	293.5	0.163645	5.125	43.5938	89172.8	3.90217	0.00381291
63.4167	0.241556	1099.36	322.75	0.186677	39.125	44.9062	89140.6	4.32119	0.00443934
76.3292	0.198	1099.36	318.188	0.188102	73.875	52.9062	88661.9	4.32119	0.00278834
153.012	0.830476	1099.36	321.344	0.179826	46.75	53.7812	88799.4	4.32119	0.00327859
53.5811	0.159792	1099.36	339.062	0.17139	1.875	40.125	88699.1	4.32119	0.00624363
29.9323	0.142111	1099.36	328.188	0.209241	19.5	52.5625	88596.2	4.2959	0.00519078
49.8054	0.335333	1099.36	353.281	0.190656	5.875	52.6875	88393.1	4.2959	0.00483062
28.8784	0.201667	1099.36	365.781	0.1631	1.75	41.1875	88408.4	4.2959	0.00758344
30.6651	0.2395	1099.36	355.781	0.240574	25.25	50.5	88394.4	4.2959	0.00686169
47.0195	0.30025	1099.36	371.5	0.190833	0.125	51.8438	88197.2	3.62249	0.00725472
25.9304	0.162625	1099.36	365.562	0.215207	3.125	48.3438	88606.2	3.62249	0.00875366
30.2986	0.1744	1099.36	370.625	0.22087	6.5	49.25	88469.1	3.62249	0.00826713
40.3177	0.213333	1099.36	359.25	0.212381	8	45.5938	88496.9	3.62249	0.00666719
36.7321	0.142667	1099.36	353.25	0.195761	1.875	43.2812	88330	3.58485	0.00588109
25.3206	0.1882	1099.36	348.688	0.221043	1.625	36.6562	88905.6	3.58485	0.00624653
31.9062	0.227444	1099.36	341	0.217356	5	43.6875	88958.4	3.58485	0.00706216
46.7231	0.163214	1099.36	323.438	0.182711	7.125	43.25	88769.4	3.54054	0.00450091
36.2083	0.192952	1099.36	317.469	0.196958	15.375	40.2188	89014.1	3.54054	0.00415591
34.0159	0.13819	1099.36	320.094	0.159548	27.25	36.5312	88931.9	3.54054	0.00470963
70.8083	0.560639	1099.36	295.25	0.0578375	1.25	34.4375	89200.9	3.54054	0.00291609
82.3177	0.235	1099.36	298.5	0.175577	0.25	25.75	89470.3	3.2445	0.00395163
63.1395	0.2651	1099.36	285.5	0.177989	2.375	30.1875	89389.1	3.2445	0.00375209
55.7381	0.217104	1099.36	266.375	0.130517	3.75	28.2188	89483.1	3.2445	0.00252416
85.2431	0.228429	1099.36	274.781	0.142601	4.25	24.125	89784.7	3.2445	0.00352147
71.369	0.1345	1099.36	258.938	0.132353	0.625	21.6562	89614.7	2.64926	0.00237841
72.9219	0.130222	1099.36	241.531	0.12739	0	20.3125	89685.3	2.64926	0.00259766
81.8988	0.149361	1099.36	227.812	0.0879845	0	20.0938	90038.1	2.64926	0.0021065
104.369	0.169125	1099.36	233.531	0.0840054	0	15.625	90008.4	2.64926	0.00160728
68.9167	0.190333	1099.36	220.438	0.051214	0	16.5938	89756.2	2.5021	0.00133487
68.8048	0.283	1099.36	225.594	0.0953946	0	14.5938	90634.7	2.5021	0.00183972
101.917	0.204833	1099.36	218.469	0.0770968	0	16.0625	90012.5	2.5021	0.00186256
76.6875	0.242139	1099.36	197	0.0968895	0	18	89708.4	2.5021	0.00143619
78.1964	0.198048	1099.36	199.844	0.0672541	0	19.3125	90049.1	2.94587	0.00131484
88.1875	0.1605	1099.36	219.125	0.0430654	0	18.1875	89508.8	2.94587	0.00174641
63.4464	0.1605	1099.36	209.531	0.0686123	0	21.75	89887.8	2.94587	0.00142312
67.7381		1099.36	210.844	0.0919934	0	25.5938	90197.2	2.94587	0.001698
60.3833	0.295	1099.36	221.531	0.0737106	0	25.5	89655.9	3.03288	0.00197978
50.5729	0.120875	1099.36	240.969	0.103063	0	26.6562	89732.8	3.03288	0.00233859
36.5007		1487.46	263.844	0.084935	0	47.9062	85143.8	3.74319	0.00319909
24.5565	0.1875	1487.46	260.281	0.0541806	0	53.2812	84915.6	3.74319	0.00315306
87.9917	0.196833	1487.46	275.781	0.0494227	0.375	54.9062	84833.1	3.74319	0.00355684
112.024	0.396611	1487.46	296.969	0.0585355	1.5	61.2812	85160	3.74319	0.00408472
24.2812	0.119	1487.46	285.875	0.0524493	10.5	58.5625	84700.6	4.84362	0.00352353
31.975	0.1094	1487.46	283.312	0.0873179	13.5	74.0625	85052.2	4.84362	0.00302116
120.152	0.167833	1487.46	305.562	0.156216	50.625	67.8125	85084.4	4.84362	0.00520738
40.6333	0.136972	1487.46	271.969	0.178687	102.625	88.9688	85084.4	4.84362	0.00243656
30.9062	0.243643	1487.46	320.531	0.193224	201	78.2188	85061.6	5.74582	0.00472891
43.4406	0.224429	1487.46	301.156	0.20954	290.875	94.1562	84729.7	5.74582	0.00253444
104.476	0.920905	1487.46	306.844	0.231064	303.375	94	84805.6	5.74582	0.00303881
23.1628	0.152667	1487.46	321.094	0.272465	289.75	85.9688	84635	5.74582	0.00361347
31.1597	0.157548	1487.46	312.719	0.315117	343.125	94.7188	84585.9	5.06381	0.00341484
36.3578	0.1284	1487.46	345.562	0.192777	363.875	85.5938	84518.4	5.06381	0.00458747
18.6354	0.192	1487.46	350.906	0.204986	294.125	77.9375	84495	5.06381	0.00607366
15.7008	0.127	1487.46	347.969	0.236178	218.875	79.6562	84526.2	5.06381	0.00661422
25.7739	0.251722	1487.46	360.375	0.229712	239.75	87.3125	84364.4	3.83941	0.0066225
15.3897	0.19275	1487.46	344.062	0.300052	203	92.375	84610.9	3.83941	0.00694284
11.4583	0.236583	1487.46	352.594	0.217097	223.25	84.1875	84547.8	3.83941	0.00712637
36.7431	0.257479	1487.46	347.812	0.341461	220.5	85.5625	84538.4	3.83941	0.00621603
17.7262	0.157167	1487.46	346.844	0.275509	192.125	78.5	84406.9	3.78711	0.0059155
12.2955	0.21525	1487.46	332.656	0.287437	138.75	75.2188	84828.8	3.78711	0.005664
20.0417	0.261262	1487.46	322.156	0.263875	133.5	79.5312	84936.6	3.78711	0.00595166
15.7397	0.243396	1487.46	312.031	0.321959	169	78.375	84812.8	4.22431	0.00416997
22.7583	0.204695	1487.46	309.031	0.297681	145.375	74.2812	85001.6	4.22431	0.00388222
29.0042	0.17775	1487.46	318.906	0.230619	125.75	59.9062	84967.5	4.22431	0.00473891
119.49	0.817708	1487.46	287.688	0.205866	76.625	66.0312	85057.2	4.22431	0.00346397
101.354	0.521	1487.46	293.906	0.133897	0.25	49.8125	85234.4	3.99713	0.00448019
54.7027	0.232444	1487.46	274.062	0.18161	0.125	57.1875	85250.6	3.99713	0.00377766
23.7361	0.177405	1487.46	258.156	0.207821	1.375	53.5312	85356.2	3.99713	0.00243713
83.4219	0.256194	1487.46	260	0.177341	0	49.2812	85597.8	3.99713	0.002937
37.5972	0.133333	1487.46	267.094	0.181526	0	43.6562	85379.7	3.0528	0.00294281
45.0139	0.134639	1487.46	232.406	0.160171	0	41.4375	85360	3.0528	0.00246934
35.5677	0.158104	1487.46	219.25	0.155681	0	40.6562	85685.9	3.0528	0.002186
53.349	0.208417	1487.46	238.5	0.113873	0	31.1875	85653.4	3.0528	0.00252541
62.6094	0.235333	1487.46	221.344	0.0893895	0	32.0938	85361.6	2.63884	0.00166903
55.6094		1487.46	217.406	0.0488068	0	33.875	86185.3	2.63884	0.00197928
66.1406	0.024	1487.46	214.875	0.109294	0	38.9688	85656.2	2.63884	0.00211672
47.1667	0.2545	1487.46	195.562	0.105695	0	36.4062	85166.6	2.63884	0.00135469
55.1094	0.191417	1487.46	198.156	0.114999	0	38.5	85557.2	2.78571	0.00122831
64.2292	0.1284	1487.46	217.312	0.0820602	0	39.0938	85118.1	2.78571	0.00171019
51.2604	0.136111	1487.46	218.938	0.0512684	0	38.8438	85307.8	2.78571	0.00160884
52.5119		1487.46	203.625	0.0197411	0	55.4062	85690.6	2.78571	0.00163619
40.6501	0.228	1487.46	223.906	0.0582154	0	58.3438	85308.8	2.89482	0.00240684
48.1354	0.155833	1487.46	227.406	0.101642	0	53.625	85293.8	2.89482	0.0020475
116.477	0.438	1550.94	271.594	0.0700939	0	54.5	84612.5	3.55612	0.00326872
78.4514	0.241333	1550.94	263.438	0.0414697	0	67.9062	84384.1	3.55612	0.00316525
350.889	0.158778	1550.94	282	0.0658942	0	56.5938	84305.9	3.55612	0.00373222
341.63	0.49425	1550.94	301.219	0.0301446	0	62.5625	84643.8	3.55612	0.00456694
43.4479	0.1345	1550.94	288.438	0.0511361	8.375	59.875	84170.3	4.29267	0.00357797
60.5299	0.12275	1550.94	287.406	0.0632566	8.75	77.0938	84533.8	4.29267	0.00326594
212.833	0.18675	1550.94	308	0.113857	28.5	68.8125	84559.4	4.29267	0.00521938
61.0186	0.117583	1550.94	271.156	0.107099	46.875	94.5312	84545.9	4.29267	0.00242269
57.9583	0.2495	1550.94	324.25	0.100431	90.875	79.3125	84527.5	5.42044	0.00495281
54.0072	0.224972	1550.94	301.5	0.139304	124.25	98.25	84206.6	5.42044	0.002708
211.819	1.06706	1550.94	308.375	0.132174	94	96.8438	84277.5	5.42044	0.00312856
34.3155	0.22375	1550.94	320.312	0.1238	64.375	89.25	84107.2	5.42044	0.00340022
33.8155	0.16575	1550.94	315.031	0.116364	90.25	97.6562	84055.6	4.6361	0.00342341
44.2538	0.158625	1550.94	348.406	0.120552	70.625	85.1562	84001.9	4.6361	0.004696
22.4762	0.215167	1550.94	352.312	0.11055	22.5	83.0312	83978.8	4.6361	0.00572856
19.3899	0.180167	1550.94	354.312	0.156814	17.875	76.0312	84012.5	4.6361	0.00646919
40.7363	0.321667	1550.94	361.344	0.0732891	30.375	90.5938	83860.3	3.75548	0.00701278
21.9885	0.202167	1550.94	346.312	0.15704	25.125	94.8438	84098.4	3.75548	0.00669678
25.2014	0.2163	1550.94	355.469	0.121716	32.125	84.5625	84036.2	3.75548	0.00708678
67.2865	0.294048	1550.94	350.375	0.153003	4.75	86.8125	84027.8	3.75548	0.00600184
30.125	0.2485	1550.94	348.656	0.157526	3.125	82.75	83896.6	3.74809	0.00593709
23.3476	0.232	1550.94	332.875	0.144795	4.125	77.1562	84312.8	3.74809	0.00564628
37.8095	0.264445	1550.94	324.219	0.104403	6.625	81.5625	84414.7	3.74809	0.00581144
28.3024	0.218214	1550.94	315.625	0.16509	40	81.875	84282.8	3.76265	0.00421428
36.4097	0.249381	1550.94	310.469	0.181045	19.375	78.1875	84475.9	3.76265	0.00389644
38.7699	0.21775	1550.94	322.062	0.150121	18	59.5312	84446.6	3.76265	0.00498825
135.026	0.860625	1550.94	287.906	0.138356	7.875	70.375	84537.8	3.76265	0.00389012
118.826	0.49725	1550.94	292.719	0.111269	0.875	53.875	84725	3.72535	0.00464709
65.9167	0.2585	1550.94	278.125	0.0933665	0.75	59.5625	84728.1	3.72535	0.00418997
59.1105	0.246111	1550.94	260.125	0.113737	8.375	56.4688	84830.3	3.72535	0.00264109
112.302	0.261929	1550.94	260.188	0.115262	7.625	52.1562	85076.6	3.72535	0.00303191
69.775	0.1695	1550.94	270.406	0.0885403	2.75	48.2812	84843.8	2.6801	0.00310459
88.3802	0.165167	1550.94	235.406	0.103339	0	42.875	84828.8	2.6801	0.00260744
103.994	0.17425	1550.94	223.031	0.0996598	0	42.7812	85180	2.6801	0.00228444
111.188	0.1807	1550.94	246.188	0.0898999	0	33.5312	85152.2	2.6801	0.00280019
158.021	0.18425	1550.94	225.625	0.0501898	0	32.9688	84872.8	2.54843	0.00178122
85.65	0.219	1550.94	224.25	0.0492023	0	40.7188	85689.1	2.54843	0.0020385
134.958	0.079	1550.94	213.719	0.025354	0	56	85158.8	2.54843	0.00207163
115.444	0.245417	1550.94	199.25	0.0785521	0	39.3438	84671.6	2.54843	0.00140159
100.542	0.238976	1550.94	199.031	0.0552694	0	43.6875	85072.8	2.33603	0.00125219
108.979	0.133542	1550.94	218.188	0.0683095	0	41.5	84613.4	2.33603	0.00176456
80.4821	0.147833	1550.94	226	0.0728278	0	44.9375	84817.5	2.33603	0.00162575
94.4427		1550.94	218.812	0.0101102	0	83.5625	85206.9	2.33603	0.00165941
77.3657		1550.94	229.312	0.0215591	0	85.1875	84806.9	2.71856	0.00229784
75.0893	0.13075	1550.94	239.406	0.0779797	0.166667	57.1562	84785.3	2.71856	0.00228909
110	0.404333	1346.53	270.844	0.0334293	0	67.8438	86837.2	3.45834	0.00326222
	0.2355	1346.53	265.156	0.0256044	0	81.2812	86603.1	3.45834	0.00312131
	0.175278	1346.53	285.75	0.0540216	0	60.1875	86452.2	3.45834	0.00370706
	0.563875	1346.53	301.438	0.0392498	0	66.4375	86782.5	3.45834	0.00475
	0.1385	1346.53	292.688	0.055848	7	62.5312	86319.4	4.102	0.00358222
	0.0885555	1346.53	293.562	0.0564494	8.625	80.3125	86634.1	4.102	0.00344575
	0.1555	1346.53	312.969	0.127619	22.75	74.5625	86665.9	4.102	0.00513516
	0.0940833	1346.53	276.938	0.0960145	19.875	95.9375	86656.2	4.102	0.00236409
	0.238429	1346.53	329.438	0.130153	43	81.875	86612.2	5.24062	0.00507028
	0.105033	1346.53	310.312	0.168101	55.875	99.4062	86261.9	5.24062	0.00291669
	0.976639	1346.53	316.25	0.15434	27.75	98.0312	86326.2	5.24062	0.00327844
	0.126381	1346.53	326.875	0.138501	11.25	91.4688	86163.8	5.24062	0.00339375
	0.132194	1346.53	324.875	0.129754	23.875	98.0625	86105.6	4.45235	0.00361228
	0.112875	1346.53	355.188	0.150072	6	87.375	86033.4	4.45235	0.00478394
	0.158917	1346.53	356.688	0.133915	4.375	87.4375	86018.1	4.45235	0.00545525
	0.114334	1346.53	360.5	0.161812	14	78.25	86060.6	4.45235	0.00625028
	0.280722	1346.53	370.531	0.0971095	16.875	94.0312	85879.1	3.6915	0.00728453
	0.172042	1346.53	355.062	0.20262	17	96.2188	86147.8	3.6915	0.00663731
	0.21325	1346.53	363.438	0.180901	16	86.3125	86061.2	3.6915	0.00717869
	0.253146	1346.53	360.406	0.1644	0.625	87.4375	86055.9	3.6915	0.00596916
	0.2163	1346.53	353.875	0.204735	1.875	87.5625	85940.6	3.69605	0.00610575
	0.207417	1346.53	336.25	0.174861	2.25	79.8125	86386.6	3.69605	0.00568356
	0.242714	1346.53	334.875	0.140014	4.875	81.5625	86478.1	3.69605	0.00585812
	0.187095	1346.53	326.5	0.178312	25.5	81.5938	86335.3	3.58915	0.00449406
	0.191267	1346.53	318.125	0.20681	9.25	79.4062	86548.8	3.58915	0.00406778
	0.174833	1346.53	327.031	0.164906	11	62.6875	86530	3.58915	0.00512244
	0.865875	1346.53	292.188	0.167293	1.75	72.0625	86648.4	3.58915	0.00403769
	0.422	1346.53	294.25	0.113648	0.25	58.5938	86844.4	3.56668	0.00457491
	0.240889	1346.53	284.469	0.0923192	0.625	60.5	86853.8	3.56668	0.00437347
	0.202305	1346.53	265.812	0.137891	8.375	58.0938	86961.6	3.56668	0.00275709
	0.239778	1346.53	264.25	0.134136	6.75	53.875	87205.9	3.56668	0.003029
	0.148313	1346.53	271.906	0.11422	2	55.5625	86981.2	2.59562	0.00324113
	0.151583	1346.53	240.938	0.137784	0	44.375	87008.4	2.59562	0.00286303
	0.167687	1346.53	225.625	0.108075	0	43.9375	87392.2	2.59562	0.00235684
	0.175667	1346.53	243.688	0.102179	0	37.9062	87403.4	2.59562	0.00290903
	0.204417	1346.53	226.938	0.0683524	0	35.0312	87111.2	2.51303	0.00182441
	0.25	1346.53	225.125	0.0683406	0	50.7188	87975.3	2.51303	0.00204966
	0.0945	1346.53	215	0.0168704	0	70.5625	87392.2	2.51303	0.0019715
	0.212867	1346.53	199.969	0.0457113	0	38.75	86909.7	2.51303	0.001417
	0.229028	1346.53	198.406	0.0480903	0	41	87350.6	2.40711	0.00129809
	0.1794	1346.53	219.844	0.0674826	0	42.9688	86836.6	2.40711	0.00186797
	0.152944	1346.53	230.375	0.0561889	0	52.5312	87100	2.40711	0.00173109
		1346.53	221.25	0.0321863	0	106.188	87519.4	2.40711	0.00166263
		1346.53	231.188	0.0100195	0	65.4375	87050	2.71185	0.00216675
	0.166	1346.53	244.75	0.0415537	0	59.1562	87002.2	2.71185	0.00244106
79.4117	0.415667	1346.53	270.844	0.185022	0	67.8438	86837.2	3.45834	0.00326222
56.9339	0.287833	1346.53	265.156	0.072537	0	81.2812	86603.1	3.45834	0.00312131
137.037	0.174722	1346.53	285.75	0.138879	0.125	60.1875	86452.2	3.45834	0.00370706
184.786	0.559	1346.53	301.438	0.072806	0	66.4375	86782.5	3.45834	0.00475
45.4209	0.146	1346.53	292.688	0.113066	9.5	62.5312	86319.4	4.102	0.00358222
74.9535	0.134111	1346.53	293.562	0.155067	12.5	80.3125	86634.1	4.102	0.00344575
186.725	0.2015	1346.53	312.969	0.207324	29.5	74.5625	86665.9	4.102	0.00513516
115.958	0.150861	1346.53	276.938	0.274994	33.875	95.9375	86656.2	4.102	0.00236409
153.292	0.290071	1346.53	329.438	0.255462	57.5	81.875	86612.2	5.24062	0.00507028
87.0619	0.192467	1346.53	310.312	0.327742	77	99.4062	86261.9	5.24062	0.00291669
212.055	0.989833	1346.53	316.25	0.296699	39.375	98.0312	86326.2	5.24062	0.00327844
57.4441	0.165033	1346.53	326.875	0.318118	11.25	91.4688	86163.8	5.24062	0.00339375
46.5208	0.141967	1346.53	324.875	0.29969	22.375	98.0625	86105.6	4.45235	0.00361228
63.9643	0.110833	1346.53	355.188	0.281091	4	87.375	86033.4	4.45235	0.00478394
26.3418	0.147	1346.53	356.688	0.368119	4	87.4375	86018.1	4.45235	0.00545525
25.2183	0.0945	1346.53	360.5	0.492677	10.5	78.25	86060.6	4.45235	0.00625028
46.4987	0.194476	1346.53	370.531	0.304643	7.5	94.0312	85879.1	3.6915	0.00728453
23.8873	0.132542	1346.53	355.062	0.595242	3.375	96.2188	86147.8	3.6915	0.00663731
29.375	0.119467	1346.53	363.438	0.438189	9	86.3125	86061.2	3.6915	0.00717869
71.4236	0.232714	1346.53	360.406	0.59121	0.5	87.4375	86055.9	3.6915	0.00596916
36.7381	0.206	1346.53	353.875	0.66361	1.75	87.5625	85940.6	3.69605	0.00610575
[truncated: 519 more rows]

## Sheet: 18
y	x1	x2	x3	x4	x5	x6	x7	x8	x9
[truncated: 1,845 more rows]

## Sheet: 19
y	x1	x2	x3	x4	x5	x6	x7	x8	x9
[truncated: 1,845 more rows]

## Sheet: 20
y	x1	x2	x3	x4	x5	x6	x7	x8	x9
[truncated: 1,845 more rows]
